# Supplementary material for: scRNA+TCR-seq reveals the pivotal role of dual receptor T lymphocytes in the pathogenesis of Kawasaki disease and during IVIG treatment
Source: Front Immunol. 2024 Oct 3;15:1457687. doi: 10.3389/fimmu.2024.1457687 (PMC11484261; doi:10.3389/fimmu.2024.1457687)
Supplement: Supplementary file 2 [file Table1.xlsx]

## Sheet: Sheet1
Donor	Treatment	CDR3	TRBV	Percentage
P1	before	CAVLNAGNNRKLIW;CASSWTEQETQYF;CASSPLPPGNEQFF	TRAV1-2;TRBV2;TRBV27	0
P1	before	CAVRRQAGTALIF;CVVNSWGKLQF;CATSDGTNSYNEQFF	TRAV12-2;TRAV12-1;TRBV24-1	0
P1	after	CAVLNAGNNRKLIW;CASSWTEQETQYF;CASSPLPPGNEQFF	TRAV1-2;TRBV2;TRBV27	0.004914
P1	after	CAVRRQAGTALIF;CVVNSWGKLQF;CATSDGTNSYNEQFF	TRAV12-2;TRAV12-1;TRBV24-1	0.004914
P2	before	CAAPNNARLMF;CAATLQTGANNLFF;CAAGAQSQRYTF	TRAV1-2;TRAV13-1;TRBV6-1	0
P2	before	CAASADQGGSEKLVF;CAGGRSRSGRKAYLRT;CASSPGGINQPQHF	TRAV29/DV5;TRAV27;TRBV28	0
P2	before	CAASEGGGADGLTF;CLLGAQGNKLVF;CSARLLGQGSEKLFF	TRAV29/DV5;TRAV40;TRBV20-1	0
P2	before	CAASMDSSYKLIF;CASSVLLGQNVNGGQETQYF;CASSEFPRATASRYNEQFF	TRAV23/DV6;TRBV9;TRBV25-1	0
P2	before	CAASMTNDKIIF;CASSRSYEQYF;CASSLTETQYF	TRAV13-1;TRBV11-2;TRBV23-1	0
P2	before	CAENYGGATNKLIF;CATHSAGLWEEKLFF;CASRPRTGEVNEQYF;CSASSGTSGHPSYNEQFF	TRAV39;TRBV10-3;TRBV6-5;TRBV20-1	0
P2	before	CAGDGSSNTGKLIF;CLVGERQDTGRRALTF;CASSGPGGQAYEQYF	TRAV3;TRAV4;TRBV9	0
P2	before	CAGHRGRTSYGKLTF;CASSDPQGNQPQHF;CASSLERAGVFNEQFF	TRAV27;TRBV25-1;TRBV11-3	0
P2	before	CALPLFGNEKLTF;CIVRTIYNQGGKLIF;CASSETGHGETQYF	TRAV16;TRAV26-1;TRBV6-1	0
P2	before	CALSDRTGRRALTF;CASSPAGAAPQETQYF;CASSFRPQGSPYEQYF	TRAV9-2;TRBV9;TRBV6-1	0
P2	before	CAMRALFGNEKLTF;CASSQKALLYNEQFF;CSATKQGVGWNTEAFF	TRAV14/DV4;TRBV3-1;TRBV20-1	0
P2	before	CATVLQTGANNLFF;CSARVGGTYEQYF;CASSPGLAGSYEQYF	TRAV17;TRBV20-1;TRBV10-2	0
P2	before	CAVEREGNNRLAF;CVVRDSWGKFQF;CASSFGFSNQPQHF	TRAV22;TRAV12-1;TRBV12-3	0
P2	before	CAVGTGFQKLVF;CASSSKGAGYNEQFF;CAGSGTGFNRIYGYTF	TRAV8-3;TRBV7-2;TRBV30	0
P2	before	CAVKGEGNNRLAF;CAYRSVEGGTSYGKLTF;CASSPYGQGPAKNIQYF;CASSPGYSNQPQHF	TRAV12-2;TRAV38-2/DV8;TRBV4-2;TRBV18	0
P2	before	CAVNDWNTGNQFYF;CAPCLGAEIYNQGGKLIF;CATSLGDVGKPQHF	TRAV12-2;TRAV16;TRBV24-1	0
P2	before	CAVRDIDNDMRF;CATDPFSGGYQKVTF;CASYGTGESYEQYF	TRAV3;TRAV17;TRBV28	0
P2	before	CAVRDPRGGSQGNLIF;CARGSQGNLIF;CASSLASGAGSYTF	TRAV3;TRAV36/DV7;TRBV12-3	0
P2	before	CAVREGDMRF;CALSPFNTGRRALTF;CASSVAGAGGIAGELFF	TRAV3;TRAV19;TRBV9	0
P2	before	CAVRKKNQGAQKLVF;CASSLGVWRTSSKLPDTQYF;CASSSPVATSNTEAFF	TRAV20;TRBV7-2;TRBV28	0
P2	before	CAVRRVGNQFYF;CASSFLFREGGPDNEQFF;CSATNPGLAGSSYEQYF	TRAV21;TRBV5-6;TRBV20-1	0
P2	before	CAVRYGGATNKLIF;CIAPNSGYSTLTF;CASSSPGQGADEQFF;CASSPGDRGTEAFF	TRAV20;TRAV26-1;TRBV28;TRBV27	0
P2	before	CAVSAGGYQKVTF;CASKGRQSEAFF;CSGGRKYNEQFF	TRAV8-4;TRBV19;TRBV20-1	0
P2	before	CAVSANTGGFKTIF;CAVSEGTGNQFYF;CASSLAQGIGDEQYF;CSVTGPGRETQYF	TRAV3;TRAV8-4;TRBV12-3;TRBV20-1	0
P2	before	CAVSEGKNTGFQKLVF;CVAPFLYNQGGKLIF;CSAREGRGEKLFF	TRAV3;TRAV12-1;TRBV20-1	0
P2	before	CAVSKTGTASKLTF;CASSYSSFRVTGELFF;CSAPGTGEQYF	TRAV8-4;TRBV6-6;TRBV20-1	0
P2	before	CAVSNTGFQKLVF;CAVRDLGRYGNNRLAF;CASSLSSGTGTDTQYF	TRAV2;TRAV1-1;TRBV4-1	0
P2	before	CGTERPLKGANSKLTF;CATHSAGLWEEKLFF;CASRPRTGEVNEQYF	TRAV30;TRBV10-3;TRBV6-5	0
P2	before	CLVGGSSGSARQLTF;CASSQESPSQGSKNIQYF;CATSENRDRGSYGYTF	TRAV4;TRBV4-3;TRBV15	0
P2	before	CVVNLDSWGKFQF;CASSLFGRADEQFF;CASSQGLNQPQHF	TRAV12-1;TRBV5-4;TRBV6-2	0
P2	before	CVVSAWGGGFKTIF;CATSDLQPIRGYF;CASSTRDTQYF	TRAV8-2;TRBV24-1;TRBV6-5	0
P2	after	CAAPNNARLMF;CAATLQTGANNLFF;CAAGAQSQRYTF	TRAV1-2;TRAV13-1;TRBV6-1	0.00186741
P2	after	CAASADQGGSEKLVF;CAGGRSRSGRKAYLRT;CASSPGGINQPQHF	TRAV29/DV5;TRAV27;TRBV28	0.00186741
P2	after	CAASEGGGADGLTF;CLLGAQGNKLVF;CSARLLGQGSEKLFF	TRAV29/DV5;TRAV40;TRBV20-1	0.00186741
P2	after	CAASMDSSYKLIF;CASSVLLGQNVNGGQETQYF;CASSEFPRATASRYNEQFF	TRAV23/DV6;TRBV9;TRBV25-1	0.00186741
P2	after	CAASMTNDKIIF;CASSRSYEQYF;CASSLTETQYF	TRAV13-1;TRBV11-2;TRBV23-1	0.00186741
P2	after	CAENYGGATNKLIF;CATHSAGLWEEKLFF;CASRPRTGEVNEQYF;CSASSGTSGHPSYNEQFF	TRAV39;TRBV10-3;TRBV6-5;TRBV20-1	0.00186741
P2	after	CAGDGSSNTGKLIF;CLVGERQDTGRRALTF;CASSGPGGQAYEQYF	TRAV3;TRAV4;TRBV9	0.00186741
P2	after	CAGHRGRTSYGKLTF;CASSDPQGNQPQHF;CASSLERAGVFNEQFF	TRAV27;TRBV25-1;TRBV11-3	0.00280112
P2	after	CALPLFGNEKLTF;CIVRTIYNQGGKLIF;CASSETGHGETQYF	TRAV16;TRAV26-1;TRBV6-1	0.00186741
P2	after	CALSDRTGRRALTF;CASSPAGAAPQETQYF;CASSFRPQGSPYEQYF	TRAV9-2;TRBV9;TRBV6-1	0.00280112
P2	after	CAMRALFGNEKLTF;CASSQKALLYNEQFF;CSATKQGVGWNTEAFF	TRAV14/DV4;TRBV3-1;TRBV20-1	0.00186741
P2	after	CATVLQTGANNLFF;CSARVGGTYEQYF;CASSPGLAGSYEQYF	TRAV17;TRBV20-1;TRBV10-2	0.00186741
P2	after	CAVEREGNNRLAF;CVVRDSWGKFQF;CASSFGFSNQPQHF	TRAV22;TRAV12-1;TRBV12-3	0.00186741
P2	after	CAVGTGFQKLVF;CASSSKGAGYNEQFF;CAGSGTGFNRIYGYTF	TRAV8-3;TRBV7-2;TRBV30	0.00186741
P2	after	CAVKGEGNNRLAF;CAYRSVEGGTSYGKLTF;CASSPYGQGPAKNIQYF;CASSPGYSNQPQHF	TRAV12-2;TRAV38-2/DV8;TRBV4-2;TRBV18	0.00186741
P2	after	CAVNDWNTGNQFYF;CAPCLGAEIYNQGGKLIF;CATSLGDVGKPQHF	TRAV12-2;TRAV16;TRBV24-1	0.00186741
P2	after	CAVRDIDNDMRF;CATDPFSGGYQKVTF;CASYGTGESYEQYF	TRAV3;TRAV17;TRBV28	0.00186741
P2	after	CAVRDPRGGSQGNLIF;CARGSQGNLIF;CASSLASGAGSYTF	TRAV3;TRAV36/DV7;TRBV12-3	0.00186741
P2	after	CAVREGDMRF;CALSPFNTGRRALTF;CASSVAGAGGIAGELFF	TRAV3;TRAV19;TRBV9	0.00186741
P2	after	CAVRKKNQGAQKLVF;CASSLGVWRTSSKLPDTQYF;CASSSPVATSNTEAFF	TRAV20;TRBV7-2;TRBV28	0.00186741
P2	after	CAVRRVGNQFYF;CASSFLFREGGPDNEQFF;CSATNPGLAGSSYEQYF	TRAV21;TRBV5-6;TRBV20-1	0.00186741
P2	after	CAVRYGGATNKLIF;CIAPNSGYSTLTF;CASSSPGQGADEQFF;CASSPGDRGTEAFF	TRAV20;TRAV26-1;TRBV28;TRBV27	0.00186741
P2	after	CAVSAGGYQKVTF;CASKGRQSEAFF;CSGGRKYNEQFF	TRAV8-4;TRBV19;TRBV20-1	0.00186741
P2	after	CAVSANTGGFKTIF;CAVSEGTGNQFYF;CASSLAQGIGDEQYF;CSVTGPGRETQYF	TRAV3;TRAV8-4;TRBV12-3;TRBV20-1	0.00186741
P2	after	CAVSEGKNTGFQKLVF;CVAPFLYNQGGKLIF;CSAREGRGEKLFF	TRAV3;TRAV12-1;TRBV20-1	0.00186741
P2	after	CAVSKTGTASKLTF;CASSYSSFRVTGELFF;CSAPGTGEQYF	TRAV8-4;TRBV6-6;TRBV20-1	0.00186741
P2	after	CAVSNTGFQKLVF;CAVRDLGRYGNNRLAF;CASSLSSGTGTDTQYF	TRAV2;TRAV1-1;TRBV4-1	0.00186741
P2	after	CGTERPLKGANSKLTF;CATHSAGLWEEKLFF;CASRPRTGEVNEQYF	TRAV30;TRBV10-3;TRBV6-5	0.00186741
P2	after	CLVGGSSGSARQLTF;CASSQESPSQGSKNIQYF;CATSENRDRGSYGYTF	TRAV4;TRBV4-3;TRBV15	0.00186741
P2	after	CVVNLDSWGKFQF;CASSLFGRADEQFF;CASSQGLNQPQHF	TRAV12-1;TRBV5-4;TRBV6-2	0.00186741
P2	after	CVVSAWGGGFKTIF;CATSDLQPIRGYF;CASSTRDTQYF	TRAV8-2;TRBV24-1;TRBV6-5	0.00280112
P3	before	CAASGHGTASKLTF;CILRVHSGGGADGLTF;CASCTGTLTDTQYF	TRAV29/DV5;TRAV26-2;TRBV28	0
P3	before	CAENGANDYKLSF;CSAPGGGVEETQYF;CASSIPDRGTGEQYF	TRAV5;TRBV20-1;TRBV19	0
P3	before	CAVNKDSNDYKLSF;CALSQGGKLIF;CASSFGTGRDNEQFF	TRAV12-2;TRAV9-2;TRBV5-1	0
P3	before	CAVSLPNNDMRF;CAASTQGGSEKLVF;CASSQDERGTTYEQYF;CASSPPAGGVKNEQFF	TRAV8-6;TRAV13-1;TRBV4-3;TRBV28	0
P3	after	CAASGHGTASKLTF;CILRVHSGGGADGLTF;CASCTGTLTDTQYF	TRAV29/DV5;TRAV26-2;TRBV28	0.00269179
P3	after	CAENGANDYKLSF;CSAPGGGVEETQYF;CASSIPDRGTGEQYF	TRAV5;TRBV20-1;TRBV19	0.00269179
P3	after	CAVNKDSNDYKLSF;CALSQGGKLIF;CASSFGTGRDNEQFF	TRAV12-2;TRAV9-2;TRBV5-1	0.00538358
P3	after	CAVSLPNNDMRF;CAASTQGGSEKLVF;CASSQDERGTTYEQYF;CASSPPAGGVKNEQFF	TRAV8-6;TRAV13-1;TRBV4-3;TRBV28	0.00269179
P4	before	CIVRVNAGNMLTF;CASTPPPLAGDATDTQYF;CASSQEWGAVYTF	TRAV26-1;TRBV9;TRBV3-1	0
P4	after	CIVRVNAGNMLTF;CASTPPPLAGDATDTQYF;CASSQEWGAVYTF	TRAV26-1;TRBV9;TRBV3-1	0.0078125
P5	before	CAVPTGNQFYF;CAIWDIAKNIQYF;CASSIEQRNTGELFF	TRAV21;TRBV27;TRBV19	0
P5	before	CAVRDLYGGATNKLIF;CATDLMIKAAGNKLTF;CASSIEVGQPQHF	TRAV1-2;TRAV17;TRBV5-1	0
P5	after	CAVPTGNQFYF;CAIWDIAKNIQYF;CASSIEQRNTGELFF	TRAV21;TRBV27;TRBV19	0.00527704
P5	after	CAVRDLYGGATNKLIF;CATDLMIKAAGNKLTF;CASSIEVGQPQHF	TRAV1-2;TRAV17;TRBV5-1	0.00527704
P6	before	CAADGRNQFYF;CASSPSGANVLTF;CASSQASGQGYTEAFF	TRAV13-1;TRBV12-3;TRBV14	0
P6	before	CAASYGNTPLVF;CSARGVRGSHEQFF;CASSLAGGHDTQYF	TRAV29/DV5;TRBV20-1;TRBV5-1	0
P6	before	CAVGNAGNNRKLIW;CVVIYRANQAGTALIF;CASSLVWNGNSPLHF	TRAV20;TRAV12-1;TRBV7-2	0
P6	before	CAVRAWGFNKFYF;CAGPNSGNTPLVF;CASSPEGGTYEQYF	TRAV3;TRAV13-2;TRBV7-2	0
P6	after	CAADGRNQFYF;CASSPSGANVLTF;CASSQASGQGYTEAFF	TRAV13-1;TRBV12-3;TRBV14	0.00732601
P6	after	CAASYGNTPLVF;CSARGVRGSHEQFF;CASSLAGGHDTQYF	TRAV29/DV5;TRBV20-1;TRBV5-1	0.00732601
P6	after	CAVGNAGNNRKLIW;CVVIYRANQAGTALIF;CASSLVWNGNSPLHF	TRAV20;TRAV12-1;TRBV7-2	0.00732601
P6	after	CAVRAWGFNKFYF;CAGPNSGNTPLVF;CASSPEGGTYEQYF	TRAV3;TRAV13-2;TRBV7-2	0.00732601
