# Supplementary material for: scRNA+TCR-seq reveals the pivotal role of dual receptor T lymphocytes in the pathogenesis of Kawasaki disease and during IVIG treatment
Source: Front Immunol. 2024 Oct 3;15:1457687. doi: 10.3389/fimmu.2024.1457687 (PMC11484261; doi:10.3389/fimmu.2024.1457687)
Supplement: Supplementary file 3 [file Table2.xlsx]

## Sheet: KD1 before
barcode	is_cell	contig_id	high_confidence	length	chain	v_gene	d_gene	j_gene	c_gene	full_length	productive	cdr3	cdr3_nt	reads	umis	raw_clonotype_id	raw_consensus_id	TCR group
AAACCTGAGTGTCCAT-1	TRUE	AAACCTGAGTGTCCAT-1_contig_1	TRUE	804	TRB	TRBV30*01	TRBD1*01	TRBJ2-2*01	TRBC2*01	TRUE	TRUE	CAWSVMGHSTGELFF	TGTGCCTGGAGTGTAATGGGACATAGCACCGGGGAGCTGTTTTTT	3686	2	clonotype12	clonotype12_consensus_1	single TCR
AAACCTGAGTGTCCAT-1	TRUE	AAACCTGAGTGTCCAT-1_contig_3	TRUE	542	TRA	TRAV12-2*01	None	TRAJ30*01	TRAC*01	TRUE	TRUE	CAAYRDDKIIF	TGTGCCGCTTACAGAGATGACAAGATCATCTTT	3636	1	clonotype12	clonotype12_consensus_2	single TCR
AAACCTGGTATGCTTG-1	TRUE	AAACCTGGTATGCTTG-1_contig_1	TRUE	540	TRB	TRBV3-1*01	TRBD2*01	TRBJ2-4*01	TRBC2*01	TRUE	TRUE	CASSQLSSGGVAKNIQYF	TGTGCCAGCAGCCAACTGTCTAGCGGGGGGGTTGCCAAAAACATTCAGTACTTC	8946	3	clonotype13	clonotype13_consensus_2	single TCR
AAACCTGGTATGCTTG-1	TRUE	AAACCTGGTATGCTTG-1_contig_2	TRUE	891	TRA	TRAV8-6*01	None	TRAJ49*01	TRAC*01	TRUE	TRUE	CAVRTFGDTGNQFYF	TGTGCTGTGAGGACGTTTGGGGACACCGGTAACCAGTTCTATTTT	6830	3	clonotype13	clonotype13_consensus_1	single TCR
AAACCTGGTCACTTCC-1	TRUE	AAACCTGGTCACTTCC-1_contig_1	TRUE	710	TRB	TRBV20-1*02	TRBD1*01	TRBJ2-6*01	TRBC2*01	TRUE	TRUE	CSARAGTGGSGANVLTF	TGCAGTGCTAGAGCCGGGACAGGGGGCTCTGGGGCCAACGTCCTGACTTTC	11263	4	clonotype14	clonotype14_consensus_2	single TCR
AAACCTGGTCACTTCC-1	TRUE	AAACCTGGTCACTTCC-1_contig_3	TRUE	571	TRA	TRAV26-1*01	None	TRAJ11*01	TRAC*01	TRUE	TRUE	CIVKSTLTF	TGCATCGTCAAGAGCACCCTCACCTTT	2846	1	clonotype14	clonotype14_consensus_1	single TCR
AAACCTGGTGGTGTAG-1	TRUE	AAACCTGGTGGTGTAG-1_contig_1	TRUE	489	TRA	TRAV4*01	None	TRAJ34*01	TRAC*01	TRUE	TRUE	CLVGAGTDKLIF	TGCCTCGTGGGTGCCGGCACCGACAAGCTCATCTTT	4337	1	clonotype15	clonotype15_consensus_2	single TCR
AAACCTGGTGGTGTAG-1	TRUE	AAACCTGGTGGTGTAG-1_contig_2	TRUE	520	TRB	TRBV12-3*01	TRBD2*01	TRBJ1-1*01	TRBC1*01	TRUE	TRUE	CASSLKGRRVNTEAFF	TGTGCCAGCAGTTTGAAAGGGCGGCGGGTGAACACTGAAGCTTTCTTT	5367	2	clonotype15	clonotype15_consensus_1	single TCR
AAACGGGGTATAGGGC-1	TRUE	AAACGGGGTATAGGGC-1_contig_1	TRUE	694	TRB	TRBV3-1*01	TRBD1*01	TRBJ1-1*01	TRBC1*01	TRUE	TRUE	CASSHSGGATEAFF	TGTGCCAGCAGCCACTCAGGGGGAGCGACTGAAGCTTTCTTT	10784	4	clonotype18	clonotype18_consensus_2	single TCR
AAACGGGGTATAGGGC-1	TRUE	AAACGGGGTATAGGGC-1_contig_2	TRUE	522	TRA	TRAV26-1*01	None	TRAJ47*01	TRAC*01	TRUE	TRUE	CIVREGDKLVF	TGCATCGTCAGAGAAGGGGACAAACTGGTCTTT	8479	2	clonotype18	clonotype18_consensus_1	single TCR
AAACGGGGTCTTCTCG-1	TRUE	AAACGGGGTCTTCTCG-1_contig_1	TRUE	567	TRA	TRAV5*01	None	TRAJ20*01	TRAC*01	TRUE	TRUE	CAGGARNDYKLSF	TGTGCAGGGGGGGCCCGTAACGACTACAAGCTCAGCTTT	12574	3	clonotype19	clonotype19_consensus_2	single TCR
AAACGGGGTCTTCTCG-1	TRUE	AAACGGGGTCTTCTCG-1_contig_2	TRUE	676	TRB	TRBV11-2*03	None	TRBJ2-5*01	TRBC2*01	TRUE	TRUE	CASSVLHVETQYF	TGTGCCAGCAGCGTATTACATGTGGAGACCCAGTACTTC	10100	3	clonotype19	clonotype19_consensus_1	single TCR
AAAGATGAGAAGGTTT-1	TRUE	AAAGATGAGAAGGTTT-1_contig_2	TRUE	803	TRB	TRBV19*01	None	TRBJ2-3*01	TRBC2*01	TRUE	TRUE	CASRTRDTQYF	TGTGCCAGTAGAACGCGAGATACGCAGTATTTT	2303	1	clonotype21	clonotype21_consensus_1	single TCR
AAAGATGAGAAGGTTT-1	TRUE	AAAGATGAGAAGGTTT-1_contig_3	TRUE	470	TRA	TRAV35*01	None	TRAJ41*01	TRAC*01	TRUE	TRUE	CAGLTLSNSGYALNF	TGTGCAGGCCTCACCCTCTCAAATTCCGGGTATGCACTCAACTTC	4761	1	clonotype21	clonotype21_consensus_2	single TCR
AAAGATGCAGTCGTGC-1	TRUE	AAAGATGCAGTCGTGC-1_contig_1	TRUE	686	TRA	TRAV3*01	None	TRAJ8*01	TRAC*01	TRUE	TRUE	CAVSDTGFQKLVF	TGTGCTGTGAGTGACACAGGCTTTCAGAAACTTGTATTT	8583	3	clonotype23	clonotype23_consensus_1	single TCR
AAAGATGCAGTCGTGC-1	TRUE	AAAGATGCAGTCGTGC-1_contig_2	TRUE	571	TRB	TRBV12-3*01	TRBD1*01	TRBJ2-7*01	TRBC2*01	TRUE	TRUE	CASSPSGTGSGEQYF	TGTGCCAGCAGTCCATCCGGGACAGGGTCGGGCGAGCAGTACTTC	11013	4	clonotype23	clonotype23_consensus_2	single TCR
AAAGATGCATTCGACA-1	TRUE	AAAGATGCATTCGACA-1_contig_1	TRUE	696	TRB	TRBV7-9*01	TRBD2*01	TRBJ2-3*01	TRBC2*01	TRUE	TRUE	CASSLFGGADTQYF	TGTGCCAGCAGCCTCTTCGGGGGGGCAGATACGCAGTATTTT	40015	14	clonotype24	clonotype24_consensus_2	single TCR
AAAGATGCATTCGACA-1	TRUE	AAAGATGCATTCGACA-1_contig_2	TRUE	741	TRA	TRAV5*01	None	TRAJ42*01	TRAC*01	TRUE	TRUE	CAENGGSQGNLIF	TGTGCAGAGAATGGAGGAAGCCAAGGAAATCTCATCTTT	5799	3	clonotype24	clonotype24_consensus_1	single TCR
AAAGATGTCGAATGGG-1	TRUE	AAAGATGTCGAATGGG-1_contig_1	TRUE	648	TRB	TRBV2*01	None	TRBJ2-7*01	TRBC2*01	TRUE	TRUE	CASYHPYEQYF	TGTGCCAGCTATCACCCGTACGAGCAGTACTTC	3395	1	clonotype28	clonotype28_consensus_1	single TCR
AAAGATGTCGAATGGG-1	TRUE	AAAGATGTCGAATGGG-1_contig_5	TRUE	553	TRA	TRAV12-1*01	None	TRAJ35*01	TRAC*01	TRUE	TRUE	CVVNIGFGNVLHC	TGTGTGGTGAACATAGGCTTTGGGAATGTGCTGCATTGC	3569	1	clonotype28	clonotype28_consensus_2	single TCR
AAAGATGTCTCCCTGA-1	TRUE	AAAGATGTCTCCCTGA-1_contig_1	TRUE	740	TRB	TRBV7-2*01	TRBD2*01	TRBJ2-2*01	TRBC2*01	TRUE	TRUE	CASSWASGGSGELFF	TGTGCCAGCAGCTGGGCTAGCGGGGGATCCGGGGAGCTGTTTTTT	48847	15	clonotype30	clonotype30_consensus_1	single TCR
AAAGATGTCTCCCTGA-1	TRUE	AAAGATGTCTCCCTGA-1_contig_3	TRUE	479	TRA	TRAV13-1*01	None	TRAJ49*01	TRAC*01	TRUE	TRUE	CAAKRANTGNQFYF	TGTGCAGCCAAACGAGCGAACACCGGTAACCAGTTCTATTTT	4089	1	clonotype30	clonotype30_consensus_2	single TCR
AAAGCAACATGACATC-1	TRUE	AAAGCAACATGACATC-1_contig_1	TRUE	672	TRA	TRAV12-1*01	None	TRAJ30*01	TRAC*01	TRUE	TRUE	CVVNIRDDKIIF	TGTGTGGTGAACATAAGAGATGACAAGATCATCTTT	5604	1	clonotype32	clonotype32_consensus_2	single TCR
AAAGCAACATGACATC-1	TRUE	AAAGCAACATGACATC-1_contig_3	TRUE	577	TRB	TRBV2*01	None	TRBJ2-2*01	TRBC2*01	TRUE	TRUE	CASMLGTGELFF	TGTGCCAGCATGTTGGGGACCGGGGAGCTGTTTTTT	9976	3	clonotype32	clonotype32_consensus_1	single TCR
AAAGCAACATGGGAAC-1	TRUE	AAAGCAACATGGGAAC-1_contig_1	TRUE	460	TRA	TRAV21*01	None	TRAJ10*01	TRAC*01	TRUE	TRUE	CAVEGGGNKLTF	TGTGCTGTGGAGGGAGGAGGAAACAAACTCACCTTT	3956	1	clonotype33	clonotype33_consensus_1	single TCR
AAAGCAACATGGGAAC-1	TRUE	AAAGCAACATGGGAAC-1_contig_2	TRUE	671	TRB	TRBV20-1*02	TRBD2*02	TRBJ2-3*01	TRBC1*01	TRUE	TRUE	CSAKRGTDTQYF	TGCAGTGCGAAGAGGGGCACAGATACGCAGTATTTT	5401	2	clonotype33	clonotype33_consensus_2	single TCR
AAAGTAGTCTTCGAGA-1	TRUE	AAAGTAGTCTTCGAGA-1_contig_1	TRUE	526	TRA	TRAV22*01	None	TRAJ22*01	TRAC*01	TRUE	TRUE	CAVLARQLTF	TGTGCTGTGCTCGCAAGGCAACTGACCTTT	4348	1	clonotype35	clonotype35_consensus_1	single TCR
AAAGTAGTCTTCGAGA-1	TRUE	AAAGTAGTCTTCGAGA-1_contig_2	TRUE	488	TRB	TRBV24-1*02	TRBD1*01	TRBJ1-1*01	TRBC1*01	TRUE	TRUE	CATSNGANTEAFF	TGTGCCACCAGTAACGGGGCAAACACTGAAGCTTTCTTT	4229	2	clonotype35	clonotype35_consensus_2	single TCR
AAATGCCCAACGCACC-1	TRUE	AAATGCCCAACGCACC-1_contig_1	TRUE	434	TRB	TRBV6-2*01	TRBD1*01	TRBJ1-2*01	TRBC1*01	TRUE	TRUE	CASSQGTNYGYTF	TGTGCCAGCAGCCAGGGGACTAACTATGGCTACACCTTC	7136	2	clonotype36	clonotype36_consensus_1	single TCR
AAATGCCCAACGCACC-1	TRUE	AAATGCCCAACGCACC-1_contig_2	TRUE	548	TRA	TRAV5*01	None	TRAJ29*01	TRAC*01	TRUE	TRUE	CAEGGNTPLVF	TGTGCAGAAGGGGGAAACACACCTCTTGTCTTT	1256	1	clonotype36	clonotype36_consensus_2	single TCR
AAATGCCGTAAGGATT-1	TRUE	AAATGCCGTAAGGATT-1_contig_1	TRUE	737	TRA	TRAV12-2*01	None	TRAJ9*01	TRAC*01	TRUE	TRUE	CAVKGGGFKTIF	TGTGCCGTGAAGGGTGGAGGCTTCAAAACTATCTTT	22149	6	clonotype37	clonotype37_consensus_2	single TCR
AAATGCCGTAAGGATT-1	TRUE	AAATGCCGTAAGGATT-1_contig_3	TRUE	670	TRB	TRBV3-1*01	TRBD2*01	TRBJ2-5*01	TRBC1*01	TRUE	TRUE	CASRSYGTETKTQYF	TGTGCCAGCAGGTCCTACGGGACTGAAACAAAGACCCAGTACTTC	609	1	clonotype37	clonotype37_consensus_1	single TCR
AAATGCCGTAGTGAAT-1	TRUE	AAATGCCGTAGTGAAT-1_contig_1	TRUE	668	TRA	TRAV8-3*01	None	TRAJ47*01	TRAC*01	TRUE	TRUE	CAHMEYGNKLVF	TGTGCCCACATGGAATATGGAAACAAACTGGTCTTT	2858	1	clonotype38	clonotype38_consensus_1	single TCR
AAATGCCGTAGTGAAT-1	TRUE	AAATGCCGTAGTGAAT-1_contig_2	TRUE	698	TRB	TRBV11-3*01	TRBD1*01	TRBJ1-1*01	TRBC1*01	TRUE	TRUE	CASSPGARNTEAFF	TGTGCCAGCAGCCCTGGGGCACGGAACACTGAAGCTTTCTTT	12148	4	clonotype38	clonotype38_consensus_2	single TCR
AAATGCCTCCTGCCAT-1	TRUE	AAATGCCTCCTGCCAT-1_contig_1	TRUE	681	TRB	TRBV20-1*02	None	TRBJ2-7*01	TRBC2*01	TRUE	TRUE	CSARDPTASSYEQYF	TGCAGTGCTAGAGATCCAACGGCGAGCTCCTACGAGCAGTACTTC	8291	3	clonotype41	clonotype41_consensus_2	single TCR
AAATGCCTCCTGCCAT-1	TRUE	AAATGCCTCCTGCCAT-1_contig_4	TRUE	702	TRA	TRAV26-2*01	None	TRAJ44*01	TRAC*01	TRUE	TRUE	CILRPLTGTASKLTF	TGCATCCTGAGACCTCTTACCGGCACTGCCAGTAAACTCACCTTT	1916	1	clonotype41	clonotype41_consensus_1	single TCR
AAATGCCTCGCGGATC-1	TRUE	AAATGCCTCGCGGATC-1_contig_1	TRUE	697	TRB	TRBV11-2*03	TRBD2*01	TRBJ2-2*01	TRBC2*01	TRUE	TRUE	CASSSGGASTGELFF	TGTGCCAGCAGCTCCGGGGGGGCAAGCACCGGGGAGCTGTTTTTT	13890	4	clonotype42	clonotype42_consensus_2	single TCR
AAATGCCTCGCGGATC-1	TRUE	AAATGCCTCGCGGATC-1_contig_3	TRUE	520	TRA	TRAV9-2*01	None	TRAJ47*02	TRAC*01	TRUE	TRUE	CALWKEYGNKLVF	TGTGCTCTTTGGAAGGAATATGGAAACAAGCTGGTCTTT	2518	1	clonotype42	clonotype42_consensus_1	single TCR
AAATGCCTCTTGCAAG-1	TRUE	AAATGCCTCTTGCAAG-1_contig_1	TRUE	590	TRB	TRBV30*01	None	TRBJ1-1*01	TRBC1*01	TRUE	TRUE	CAWRSAGSEAFF	TGTGCCTGGAGATCGGCCGGCTCTGAAGCTTTCTTT	7278	2	clonotype3	clonotype3_consensus_1	single TCR
AAATGCCTCTTGCAAG-1	TRUE	AAATGCCTCTTGCAAG-1_contig_2	TRUE	566	TRA	TRAV17*01	None	TRAJ44*01	TRAC*01	TRUE	TRUE	CATYTGTASKLTF	TGTGCTACCTATACCGGCACTGCCAGTAAACTCACCTTT	2617	1	clonotype3	clonotype3_consensus_2	single TCR
AACACGTAGTACATGA-1	TRUE	AACACGTAGTACATGA-1_contig_1	TRUE	547	TRA	TRAV12-2*01	None	TRAJ3*01	TRAC*01	TRUE	TRUE	CAVSSSASKIIF	TGTGCCGTGAGCAGCAGTGCTTCCAAGATAATCTTT	6213	2	clonotype45	clonotype45_consensus_1	single TCR
AACACGTAGTACATGA-1	TRUE	AACACGTAGTACATGA-1_contig_2	TRUE	657	TRB	TRBV5-1*01	TRBD1*01	TRBJ2-7*01	TRBC2*01	TRUE	TRUE	CASSVGGVWEQYF	TGCGCCAGCAGCGTAGGTGGCGTTTGGGAGCAGTACTTC	11493	4	clonotype45	clonotype45_consensus_2	single TCR
AACACGTGTTCATGGT-1	TRUE	AACACGTGTTCATGGT-1_contig_1	TRUE	729	TRB	TRBV3-1*01	TRBD1*01	TRBJ1-4*01	TRBC1*01	TRUE	TRUE	CASSQDPGGNEKLFF	TGTGCCAGCAGCCAAGATCCTGGGGGTAATGAAAAACTGTTTTTT	12574	5	clonotype49	clonotype49_consensus_1	single TCR
AACACGTGTTCATGGT-1	TRUE	AACACGTGTTCATGGT-1_contig_3	TRUE	728	TRA	TRAV13-2*01	None	TRAJ28*01	TRAC*01	TRUE	TRUE	CAENMGYSGAGSYQLTF	TGTGCAGAGAATATGGGATACTCTGGGGCTGGGAGTTACCAACTCACTTTC	11598	4	clonotype49	clonotype49_consensus_2	single TCR
AACCATGCAACGATGG-1	TRUE	AACCATGCAACGATGG-1_contig_1	TRUE	686	TRA	TRAV8-6*01	None	TRAJ6*01	TRAC*01	TRUE	TRUE	CAVSDKGSYIPTF	TGTGCTGTGAGTGATAAAGGAAGCTACATACCTACATTT	10034	3	clonotype51	clonotype51_consensus_2	single TCR
AACCATGCAACGATGG-1	TRUE	AACCATGCAACGATGG-1_contig_2	TRUE	650	TRB	TRBV23-1*01	None	TRBJ1-6*02	TRBC1*01	TRUE	TRUE	CISAPAVNRSPLHF	TGTATCTCTGCGCCAGCAGTCAATCGTTCACCCCTCCACTTT	25492	8	clonotype51	clonotype51_consensus_1	single TCR
AACCATGCATTGGCGC-1	TRUE	AACCATGCATTGGCGC-1_contig_1	TRUE	517	TRA	TRAV17*01	None	TRAJ30*01	TRAC*01	TRUE	TRUE	CATDDRSRDDKIIF	TGTGCTACGGACGATAGGAGCAGAGATGACAAGATCATCTTT	9123	2	clonotype53	clonotype53_consensus_2	single TCR
AACCATGCATTGGCGC-1	TRUE	AACCATGCATTGGCGC-1_contig_2	TRUE	471	TRB	TRBV27*01	TRBD2*01	TRBJ1-6*01	TRBC1*01	TRUE	TRUE	CASSLGGNSPLHF	TGTGCCAGCAGTCTCGGGGGGAATTCACCCCTCCACTTT	1478	1	clonotype53	clonotype53_consensus_1	single TCR
AACCATGGTGCAGACA-1	TRUE	AACCATGGTGCAGACA-1_contig_1	TRUE	539	TRA	TRAV23/DV6*01	None	TRAJ40*01	TRAC*01	TRUE	TRUE	CAAREQGSGTYKYIF	TGTGCAGCAAGGGAACAGGGGTCAGGAACCTACAAATACATCTTT	3813	1	clonotype55	clonotype55_consensus_1	single TCR
AACCATGGTGCAGACA-1	TRUE	AACCATGGTGCAGACA-1_contig_2	TRUE	487	TRB	TRBV6-1*01	TRBD1*01	TRBJ1-2*01	TRBC1*01	TRUE	TRUE	CASLPDRVPYYGYTF	TGTGCCAGCCTGCCGGACAGGGTGCCGTACTATGGCTACACCTTC	4559	1	clonotype55	clonotype55_consensus_2	single TCR
AACCGCGCACCTTGTC-1	TRUE	AACCGCGCACCTTGTC-1_contig_1	TRUE	537	TRB	TRBV11-2*03	TRBD2*01	TRBJ2-1*01	TRBC2*01	TRUE	TRUE	CASRSGTSGGAEQFF	TGTGCCAGCAGATCCGGGACTAGCGGGGGGGCTGAGCAGTTCTTC	7330	2	clonotype56	clonotype56_consensus_1	single TCR
AACCGCGCACCTTGTC-1	TRUE	AACCGCGCACCTTGTC-1_contig_3	TRUE	571	TRA	TRAV13-1*01	None	TRAJ42*01	TRAC*01	TRUE	TRUE	CAASNRELGGSQGNLIF	TGTGCAGCAAGTAATAGGGAGCTCGGAGGAAGCCAAGGAAATCTCATCTTT	4084	1	clonotype56	clonotype56_consensus_2	single TCR
AACCGCGTCTGATACG-1	TRUE	AACCGCGTCTGATACG-1_contig_1	TRUE	677	TRB	TRBV7-6*01	None	TRBJ1-1*01	TRBC1*01	TRUE	TRUE	CASSRELNTEAFF	TGTGCCAGCAGCAGGGAATTGAACACTGAAGCTTTCTTT	13119	6	clonotype57	clonotype57_consensus_1	single TCR
AACCGCGTCTGATACG-1	TRUE	AACCGCGTCTGATACG-1_contig_2	TRUE	517	TRA	TRAV20*01	None	TRAJ8*01	TRAC*01	TRUE	TRUE	CAVQADTGFQKLVF	TGTGCTGTGCAGGCCGACACAGGCTTTCAGAAACTTGTATTT	8260	2	clonotype57	clonotype57_consensus_2	single TCR
AACGTTGAGAATTGTG-1	TRUE	AACGTTGAGAATTGTG-1_contig_1	TRUE	473	TRA	TRAV5*01	None	TRAJ52*01	TRAC*01	TRUE	TRUE	CAESDAGGTSYGKLTF	TGTGCAGAGAGTGATGCTGGTGGTACTAGCTATGGAAAGCTGACATTT	4755	1	clonotype58	clonotype58_consensus_1	single TCR
AACGTTGAGAATTGTG-1	TRUE	AACGTTGAGAATTGTG-1_contig_3	TRUE	665	TRB	TRBV29-1*01	TRBD1*01	TRBJ2-3*01	TRBC2*01	TRUE	TRUE	CSVAFQGAIDTQYF	TGCAGCGTTGCTTTTCAGGGGGCCATAGATACGCAGTATTTT	6444	2	clonotype58	clonotype58_consensus_2	single TCR
AACTCAGGTGGCTCCA-1	TRUE	AACTCAGGTGGCTCCA-1_contig_1	TRUE	838	TRB	TRBV5-4*01	TRBD1*01	TRBJ1-3*01	TRBC1*01	TRUE	TRUE	CASSFQTGSGNTIYF	TGTGCCAGCAGCTTTCAAACAGGGAGCGGAAACACCATATATTTT	9571	4	clonotype65	clonotype65_consensus_1	single TCR
AACTCAGGTGGCTCCA-1	TRUE	AACTCAGGTGGCTCCA-1_contig_3	TRUE	741	TRA	TRAV29/DV5*01	None	TRAJ13*02	TRAC*01	TRUE	TRUE	CAASDWGYQKVTF	TGTGCAGCAAGCGATTGGGGTTACCAGAAAGTTACCTTT	2063	1	clonotype65	clonotype65_consensus_2	single TCR
AACTCAGGTTGTTTGG-1	TRUE	AACTCAGGTTGTTTGG-1_contig_1	TRUE	563	TRA	TRAV12-2*01	None	TRAJ40*01	TRAC*01	TRUE	TRUE	CAVKGSGTYKYIF	TGTGCCGTGAAGGGCTCAGGAACCTACAAATACATCTTT	12241	4	clonotype66	clonotype66_consensus_1	single TCR
AACTCAGGTTGTTTGG-1	TRUE	AACTCAGGTTGTTTGG-1_contig_2	TRUE	696	TRB	TRBV5-1*01	None	TRBJ1-1*01	TRBC1*01	TRUE	TRUE	CASSLDSRSLNTEAFF	TGCGCCAGCAGCTTGGATTCCCGTTCCCTGAACACTGAAGCTTTCTTT	14070	5	clonotype66	clonotype66_consensus_2	single TCR
AACTCCCAGTTCGCAT-1	TRUE	AACTCCCAGTTCGCAT-1_contig_1	TRUE	672	TRB	TRBV4-1*01	TRBD2*02	TRBJ2-1*01	TRBC2*01	TRUE	TRUE	CASSQYLMAGPGDGNEQFF	TGCGCCAGCAGCCAATACCTCATGGCGGGACCGGGAGATGGCAATGAGCAGTTCTTC	8584	4	clonotype68	clonotype68_consensus_2	single TCR
AACTCCCAGTTCGCAT-1	TRUE	AACTCCCAGTTCGCAT-1_contig_4	TRUE	501	TRA	TRAV13-1*01	None	TRAJ22*01	TRAC*01	TRUE	TRUE	CAASILASRQLTF	TGTGCAGCAAGTATCCTCGCGTCAAGGCAACTGACCTTT	3925	1	clonotype68	clonotype68_consensus_1	single TCR
AACTCCCGTTCAACCA-1	TRUE	AACTCCCGTTCAACCA-1_contig_1	TRUE	553	TRB	TRBV7-9*01	TRBD1*01	TRBJ2-7*01	TRBC2*01	TRUE	TRUE	CASSHWTGGIDEQYF	TGTGCCAGCAGCCATTGGACAGGGGGCATCGACGAGCAGTACTTC	8280	3	clonotype69	clonotype69_consensus_1	single TCR
AACTCCCGTTCAACCA-1	TRUE	AACTCCCGTTCAACCA-1_contig_2	TRUE	623	TRA	TRAV38-2/DV8*01	None	TRAJ15*01	TRAC*01	TRUE	TRUE	CAYREINQAGTALIF	TGTGCTTATCGCGAGATCAACCAGGCAGGAACTGCTCTGATCTTT	4753	1	clonotype69	clonotype69_consensus_2	single TCR
AACTCCCGTTCGTCTC-1	TRUE	AACTCCCGTTCGTCTC-1_contig_1	TRUE	686	TRB	TRBV7-2*01	None	TRBJ2-3*01	TRBC2*01	TRUE	TRUE	CASSLAGIGDTQYF	TGTGCCAGCAGCTTAGCGGGGATTGGAGATACGCAGTATTTT	15528	6	clonotype70	clonotype70_consensus_2	single TCR
AACTCCCGTTCGTCTC-1	TRUE	AACTCCCGTTCGTCTC-1_contig_2	TRUE	551	TRA	TRAV12-3*01	None	TRAJ34*01	TRAC*01	TRUE	TRUE	CAMSENTDKLIF	TGTGCAATGAGCGAGAACACCGACAAGCTCATCTTT	3184	1	clonotype70	clonotype70_consensus_1	single TCR
AACTCCCTCAAAGTAG-1	TRUE	AACTCCCTCAAAGTAG-1_contig_1	TRUE	531	TRA	TRAV26-1*01	None	TRAJ38*01	TRAC*01	TRUE	TRUE	CIVNNAGNNRKLIW	TGCATCGTCAATAATGCTGGCAACAACCGTAAGCTGATTTGG	3616	1	clonotype71	clonotype71_consensus_2	single TCR
AACTCCCTCAAAGTAG-1	TRUE	AACTCCCTCAAAGTAG-1_contig_2	TRUE	476	TRB	TRBV28*01	TRBD1*01	TRBJ1-2*01	TRBC1*01	TRUE	TRUE	CASSLTQGALSYTF	TGTGCCAGCAGCCTCACACAGGGCGCCCTGAGCTACACCTTC	7934	3	clonotype71	clonotype71_consensus_1	single TCR
AACTCTTTCCTAGTGA-1	TRUE	AACTCTTTCCTAGTGA-1_contig_1	TRUE	663	TRB	TRBV4-1*01	None	TRBJ1-3*01	TRBC1*01	TRUE	TRUE	CASSRRPISGNTIYF	TGCGCCAGCAGCCGCAGACCTATCTCTGGAAACACCATATATTTT	22339	8	clonotype73	clonotype73_consensus_1	single TCR
AACTCTTTCCTAGTGA-1	TRUE	AACTCTTTCCTAGTGA-1_contig_2	TRUE	703	TRA	TRAV29/DV5*01	None	TRAJ13*02	TRAC*01	TRUE	TRUE	CAASATGYQKVTF	TGTGCAGCAAGCGCGACGGGTTACCAGAAAGTTACCTTT	8138	2	clonotype73	clonotype73_consensus_2	single TCR
AACTGGTCAATACGCT-1	TRUE	AACTGGTCAATACGCT-1_contig_1	TRUE	540	TRB	TRBV20-1*02	None	TRBJ2-5*01	TRBC2*01	TRUE	TRUE	CSARAPYQRSETQYF	TGCAGTGCTAGAGCCCCGTACCAAAGGTCAGAGACCCAGTACTTC	13363	5	clonotype74	clonotype74_consensus_1	single TCR
AACTGGTCAATACGCT-1	TRUE	AACTGGTCAATACGCT-1_contig_2	TRUE	484	TRA	TRAV24*01	None	TRAJ28*01	TRAC*01	TRUE	TRUE	CAFTGAGSYQLTF	TGTGCCTTTACTGGGGCTGGGAGTTACCAACTCACTTTC	9155	2	clonotype74	clonotype74_consensus_2	single TCR
AACTGGTCAGGAATCG-1	TRUE	AACTGGTCAGGAATCG-1_contig_1	TRUE	672	TRB	TRBV24-1*01	TRBD1*01	TRBJ2-6*01	TRBC2*01	TRUE	TRUE	CATSEVGAPGANVLTF	TGTGCCACCAGTGAGGTCGGGGCTCCTGGGGCCAACGTCCTGACTTTC	11164	4	clonotype75	clonotype75_consensus_2	single TCR
AACTGGTCAGGAATCG-1	TRUE	AACTGGTCAGGAATCG-1_contig_2	TRUE	560	TRA	TRAV13-1*01	None	TRAJ42*01	TRAC*01	TRUE	TRUE	CAAWNNYGGSQGNLIF	TGTGCAGCATGGAATAATTATGGAGGAAGCCAAGGAAATCTCATCTTT	6489	2	clonotype75	clonotype75_consensus_1	single TCR
AACTGGTGTACCGTTA-1	TRUE	AACTGGTGTACCGTTA-1_contig_1	TRUE	708	TRB	TRBV13*01	TRBD2*02	TRBJ1-3*01	TRBC1*01	TRUE	TRUE	CASSLAVSGGSGNTIYF	TGTGCCAGCAGCTTAGCGGTATCCGGAGGCTCTGGAAACACCATATATTTT	16382	6	clonotype76	clonotype76_consensus_1	single TCR
AACTGGTGTACCGTTA-1	TRUE	AACTGGTGTACCGTTA-1_contig_2	TRUE	423	TRA	TRAV9-2*01	None	TRAJ39*01	TRAC*01	TRUE	TRUE	CTSVLSFRMNNNAGNMLTF	TGTACTTCTGTGCTCTCATTTCGCATGAATAATAATGCAGGCAACATGCTCACCTTT	4226	1	clonotype76	clonotype76_consensus_2	single TCR
AACTGGTGTAGCGTGA-1	TRUE	AACTGGTGTAGCGTGA-1_contig_1	TRUE	721	TRB	TRBV6-1*01	TRBD1*01	TRBJ1-3*01	TRBC1*01	TRUE	TRUE	CASGGQGRGNTIYF	TGTGCCAGCGGCGGACAGGGACGTGGAAACACCATATATTTT	11001	5	clonotype77	clonotype77_consensus_1	single TCR
AACTGGTGTAGCGTGA-1	TRUE	AACTGGTGTAGCGTGA-1_contig_3	TRUE	556	TRA	TRAV19*01	None	TRAJ10*01	TRAC*01	TRUE	TRUE	CALSDVRMDILTGGGNKLTF	TGTGCTCTGAGTGACGTAAGGATGGACATACTCACGGGAGGAGGAAACAAACTCACCTTT	3349	1	clonotype77	clonotype77_consensus_2	single TCR
AACTGGTGTGTGCGTC-1	TRUE	AACTGGTGTGTGCGTC-1_contig_1	TRUE	686	TRB	TRBV14*01	TRBD2*01	TRBJ1-1*01	TRBC1*01	TRUE	TRUE	CASSAGGWAFF	TGTGCCAGCAGTGCGGGGGGATGGGCTTTCTTT	21921	7	clonotype78	clonotype78_consensus_2	single TCR
AACTGGTGTGTGCGTC-1	TRUE	AACTGGTGTGTGCGTC-1_contig_2	TRUE	846	TRA	TRAV8-1*01	None	TRAJ5*01	TRAC*01	TRUE	TRUE	CAVNLPMDTGRRALTF	TGTGCCGTGAATTTACCTATGGACACGGGCAGGAGAGCACTTACTTTT	9783	3	clonotype78	clonotype78_consensus_1	single TCR
AACTGGTTCCAAACTG-1	TRUE	AACTGGTTCCAAACTG-1_contig_1	TRUE	618	TRB	TRBV18*01	TRBD1*01	TRBJ1-1*01	TRBC1*01	TRUE	TRUE	CASSLKGAQNTEAFF	TGTGCCAGCTCACTTAAGGGGGCCCAGAACACTGAAGCTTTCTTT	9930	3	clonotype79	clonotype79_consensus_2	single TCR
AACTGGTTCCAAACTG-1	TRUE	AACTGGTTCCAAACTG-1_contig_4	TRUE	464	TRA	TRAV13-1*01	None	TRAJ45*01	TRAC*01	TRUE	TRUE	CAPGGGGADGLTF	TGTGCACCTGGGGGAGGAGGTGCTGACGGACTCACCTTT	3720	1	clonotype79	clonotype79_consensus_1	single TCR
AACTTTCGTTGATTGC-1	TRUE	AACTTTCGTTGATTGC-1_contig_1	TRUE	740	TRA	TRAV5*01	None	TRAJ15*01	TRAC*01	TRUE	TRUE	CAVNQAGTALIF	TGTGCAGTGAACCAGGCAGGAACTGCTCTGATCTTT	12248	3	clonotype83	clonotype83_consensus_2	single TCR
AACTTTCGTTGATTGC-1	TRUE	AACTTTCGTTGATTGC-1_contig_3	TRUE	687	TRB	TRBV10-3*01	TRBD2*02	TRBJ2-3*01	TRBC2*01	TRUE	TRUE	CAISDAERETPDTQYF	TGTGCCATCAGTGACGCCGAGCGGGAGACCCCAGATACGCAGTATTTT	19944	6	clonotype83	clonotype83_consensus_1	single TCR
AAGACCTAGTCCGTAT-1	TRUE	AAGACCTAGTCCGTAT-1_contig_1	TRUE	718	TRB	TRBV5-1*01	None	TRBJ2-2*01	TRBC2*01	TRUE	TRUE	CASSKDGTGELFF	TGCGCCAGCAGCAAGGACGGCACCGGGGAGCTGTTTTTT	25708	8	clonotype86	clonotype86_consensus_1	single TCR
AAGACCTAGTCCGTAT-1	TRUE	AAGACCTAGTCCGTAT-1_contig_3	TRUE	580	TRA	TRAV19*01	None	TRAJ52*01	TRAC*01	TRUE	TRUE	CALSEEWEGTSYGKLTF	TGTGCTCTGAGTGAGGAGTGGGAGGGTACTAGCTATGGAAAGCTGACATTT	6374	2	clonotype86	clonotype86_consensus_2	single TCR
AAGACCTCACCATGTA-1	TRUE	AAGACCTCACCATGTA-1_contig_1	TRUE	529	TRA	TRAV22*01	None	TRAJ43*01	TRAC*01	TRUE	TRUE	CAVGDNDMRF	TGTGCTGTGGGGGACAATGACATGCGCTTT	4622	1	clonotype88	clonotype88_consensus_1	single TCR
AAGACCTCACCATGTA-1	TRUE	AAGACCTCACCATGTA-1_contig_3	TRUE	535	TRB	TRBV30*01	TRBD1*01	TRBJ1-1*01	TRBC1*01	TRUE	TRUE	CAWSQTGRAFF	TGTGCCTGGAGTCAGACAGGGAGGGCTTTCTTT	1684	1	clonotype88	clonotype88_consensus_2	single TCR
AAGCCGCTCGACAGCC-1	TRUE	AAGCCGCTCGACAGCC-1_contig_1	TRUE	697	TRB	TRBV5-1*01	TRBD2*01	TRBJ2-3*01	TRBC2*01	TRUE	TRUE	CASSDGLAGGRTDTQYF	TGCGCCAGCAGCGATGGACTAGCGGGGGGCCGCACAGATACGCAGTATTTT	37009	13	clonotype94	clonotype94_consensus_2	single TCR
AAGCCGCTCGACAGCC-1	TRUE	AAGCCGCTCGACAGCC-1_contig_2	TRUE	516	TRA	TRAV1-1*01	None	TRAJ20*01	TRAC*01	TRUE	TRUE	CAVNGDYKLSF	TGCGCTGTGAACGGCGACTACAAGCTCAGCTTT	4333	1	clonotype94	clonotype94_consensus_1	single TCR
AAGCCGCTCTTTACAC-1	TRUE	AAGCCGCTCTTTACAC-1_contig_1	TRUE	471	TRA	TRAV21*01	None	TRAJ9*01	TRAC*01	TRUE	TRUE	CAVSDTGGFKTIF	TGTGCTGTGAGCGATACTGGAGGCTTCAAAACTATCTTT	3940	1	clonotype95	clonotype95_consensus_2	single TCR
AAGCCGCTCTTTACAC-1	TRUE	AAGCCGCTCTTTACAC-1_contig_2	TRUE	690	TRB	TRBV20-1*02	None	TRBJ1-2*01	TRBC1*01	TRUE	TRUE	CSASKGNGYTF	TGCAGTGCTAGTAAAGGGAATGGCTACACCTTC	8142	3	clonotype95	clonotype95_consensus_1	single TCR
AAGGAGCAGCCAACAG-1	TRUE	AAGGAGCAGCCAACAG-1_contig_2	TRUE	533	TRB	TRBV27*01	TRBD1*01	TRBJ2-1*01	TRBC2*01	TRUE	TRUE	CASSYSGLNEQFF	TGTGCCAGCAGTTATTCAGGGCTCAATGAGCAGTTCTTC	3466	1	clonotype96	clonotype96_consensus_2	single TCR
AAGGAGCAGCCAACAG-1	TRUE	AAGGAGCAGCCAACAG-1_contig_3	TRUE	557	TRA	TRAV5*01	None	TRAJ37*02	TRAC*01	TRUE	TRUE	CAELISSNTGKLIF	TGTGCAGAGCTTATCTCTAGCAACACAGGCAAACTAATCTTT	3227	1	clonotype96	clonotype96_consensus_1	single TCR
AAGGAGCCATAAGACA-1	TRUE	AAGGAGCCATAAGACA-1_contig_1	TRUE	657	TRB	TRBV5-1*01	None	TRBJ1-5*01	TRBC1*01	TRUE	TRUE	CASSLSADQPQHF	TGCGCCAGCAGCTTGTCGGCAGATCAGCCCCAGCATTTT	4227	2	clonotype97	clonotype97_consensus_1	single TCR
AAGGAGCCATAAGACA-1	TRUE	AAGGAGCCATAAGACA-1_contig_3	TRUE	535	TRA	TRAV12-3*01	None	TRAJ54*01	TRAC*01	TRUE	TRUE	CAMIQGAQKLVF	TGTGCAATGATCCAGGGAGCCCAGAAGCTGGTATTT	2945	1	clonotype97	clonotype97_consensus_2	single TCR
AAGGCAGGTAGCCTAT-1	TRUE	AAGGCAGGTAGCCTAT-1_contig_1	TRUE	684	TRB	TRBV5-1*01	TRBD2*02	TRBJ2-2*01	TRBC2*01	TRUE	TRUE	CASSLGAGRNTGELFF	TGCGCCAGCAGCTTAGGGGCGGGACGGAACACCGGGGAGCTGTTTTTT	10341	3	clonotype103	clonotype103_consensus_2	single TCR
AAGGCAGGTAGCCTAT-1	TRUE	AAGGCAGGTAGCCTAT-1_contig_3	TRUE	552	TRA	TRAV12-2*01	None	TRAJ38*01	TRAC*01	TRUE	TRUE	CATSNAGNNRKLIW	TGTGCCACATCTAATGCTGGCAACAACCGTAAGCTGATTTGG	5966	2	clonotype103	clonotype103_consensus_1	single TCR
AAGGCAGTCTAAGCCA-1	TRUE	AAGGCAGTCTAAGCCA-1_contig_1	TRUE	653	TRB	TRBV4-1*01	TRBD1*01	TRBJ2-1*01	TRBC2*01	TRUE	TRUE	CASSGPGDEQFF	TGCGCCAGCAGCGGACCGGGCGATGAGCAGTTCTTC	31929	10	clonotype105	clonotype105_consensus_2	single TCR
AAGGCAGTCTAAGCCA-1	TRUE	AAGGCAGTCTAAGCCA-1_contig_4	TRUE	558	TRA	TRAV12-3*01	None	TRAJ45*01	TRAC*01	TRUE	TRUE	CAIHSGGGADGLTF	TGTGCAATACATTCAGGAGGAGGTGCTGACGGACTCACCTTT	2064	1	clonotype105	clonotype105_consensus_1	single TCR
AAGGTTCAGTAGGTGC-1	TRUE	AAGGTTCAGTAGGTGC-1_contig_1	TRUE	634	TRB	TRBV19*01	TRBD1*01	TRBJ2-1*01	TRBC2*01	TRUE	TRUE	CASTGTGYNEQFF	TGTGCCAGTACTGGGACAGGTTACAATGAGCAGTTCTTC	2144	1	clonotype106	clonotype106_consensus_2	single TCR
AAGGTTCAGTAGGTGC-1	TRUE	AAGGTTCAGTAGGTGC-1_contig_2	TRUE	581	TRA	TRAV8-3*01	None	TRAJ5*01	TRAC*01	TRUE	TRUE	CAAPEDTGRRALTF	TGTGCCGCCCCTGAGGACACGGGCAGGAGAGCACTTACTTTT	7013	2	clonotype106	clonotype106_consensus_1	single TCR
AAGGTTCGTCCCTACT-1	TRUE	AAGGTTCGTCCCTACT-1_contig_1	TRUE	873	TRB	TRBV9*01	TRBD2*01	TRBJ2-7*01	TRBC2*01	TRUE	TRUE	CASSVDGTSTYEQYF	TGTGCCAGCAGCGTAGACGGGACTAGTACCTACGAGCAGTACTTC	12992	4	clonotype107	clonotype107_consensus_2	single TCR
AAGGTTCGTCCCTACT-1	TRUE	AAGGTTCGTCCCTACT-1_contig_2	TRUE	634	TRA	TRAV3*01	None	TRAJ9*01	TRAC*01	TRUE	TRUE	CAVSANTGGFKTIF	TGTGCTGTGAGTGCTAATACTGGAGGCTTCAAAACTATCTTT	2471	1	clonotype107	clonotype107_consensus_1	single TCR
AAGTCTGGTACCAGTT-1	TRUE	AAGTCTGGTACCAGTT-1_contig_1	TRUE	692	TRB	TRBV12-4*01	None	TRBJ1-6*02	TRBC1*01	TRUE	TRUE	CASSLAVQNNSPLHF	TGTGCCAGCAGTTTAGCCGTACAGAATAATTCACCCCTCCACTTT	22354	7	clonotype109	clonotype109_consensus_2	single TCR
AAGTCTGGTACCAGTT-1	TRUE	AAGTCTGGTACCAGTT-1_contig_4	TRUE	526	TRA	TRAV23/DV6*01	None	TRAJ52*01	TRAC*01	TRUE	TRUE	CAASQGGTSYGKLTF	TGTGCAGCAAGCCAAGGTGGTACTAGCTATGGAAAGCTGACATTT	2869	1	clonotype109	clonotype109_consensus_1	single TCR
AATCCAGCAGCTATTG-1	TRUE	AATCCAGCAGCTATTG-1_contig_1	TRUE	701	TRB	TRBV7-9*03	TRBD1*01	TRBJ2-7*01	TRBC2*01	TRUE	TRUE	CASSLRAGAGGSGEQYF	TGTGCCAGCAGCTTACGGGCTGGGGCCGGGGGCTCGGGGGAGCAGTACTTC	6966	2	clonotype112	clonotype112_consensus_2	single TCR
AATCCAGCAGCTATTG-1	TRUE	AATCCAGCAGCTATTG-1_contig_3	TRUE	535	TRA	TRAV17*01	None	TRAJ24*02	TRAC*01	TRUE	TRUE	CATDASWGTTDSWGKLQF	TGTGCTACGGACGCGTCGTGGGGGACAACTGACAGCTGGGGGAAATTGCAGTTT	3393	1	clonotype112	clonotype112_consensus_1	single TCR
AATCGGTAGTGGAGTC-1	TRUE	AATCGGTAGTGGAGTC-1_contig_1	TRUE	517	TRA	TRAV21*01	None	TRAJ53*01	TRAC*01	TRUE	TRUE	CAVRGSNYKLTF	TGTGCTGTGAGAGGTAGCAACTATAAACTGACATTT	9976	3	clonotype116	clonotype116_consensus_2	single TCR
AATCGGTAGTGGAGTC-1	TRUE	AATCGGTAGTGGAGTC-1_contig_2	TRUE	548	TRB	TRBV7-8*01	TRBD2*01	TRBJ1-1*01	TRBC1*01	TRUE	TRUE	CASSLVGGGTEAFF	TGTGCCAGCAGCTTAGTAGGTGGGGGGACTGAAGCTTTCTTT	18097	6	clonotype116	clonotype116_consensus_1	single TCR
AATCGGTGTACCGTTA-1	TRUE	AATCGGTGTACCGTTA-1_contig_1	TRUE	665	TRB	TRBV4-1*01	TRBD2*01	TRBJ2-7*01	TRBC2*01	TRUE	TRUE	CASSQEGVAGVYEQYF	TGCGCCAGCAGCCAAGAGGGGGTAGCGGGGGTCTACGAGCAGTACTTC	7106	4	clonotype117	clonotype117_consensus_1	single TCR
AATCGGTGTACCGTTA-1	TRUE	AATCGGTGTACCGTTA-1_contig_2	TRUE	534	TRA	TRAV1-2*01	None	TRAJ8*01	TRAC*01	TRUE	TRUE	CAVRGVNTGFQKLVF	TGTGCTGTGAGAGGGGTGAACACAGGCTTTCAGAAACTTGTATTT	1189	1	clonotype117	clonotype117_consensus_2	single TCR
AATCGGTGTATCGCAT-1	TRUE	AATCGGTGTATCGCAT-1_contig_1	TRUE	718	TRA	TRAV8-6*02	None	TRAJ26*01	TRAC*01	TRUE	TRUE	CAVSGEYGQNFVF	TGTGCTGTGAGTGGAGAATATGGTCAGAATTTTGTCTTT	11499	3	clonotype118	clonotype118_consensus_2	single TCR
AATCGGTGTATCGCAT-1	TRUE	AATCGGTGTATCGCAT-1_contig_2	TRUE	662	TRB	TRBV2*01	TRBD2*02	TRBJ2-3*01	TRBC2*01	TRUE	TRUE	CASRTTASGKADTQYF	TGTGCCAGCAGGACGACGGCTAGCGGGAAGGCAGATACGCAGTATTTT	6410	3	clonotype118	clonotype118_consensus_1	single TCR
AATCGGTGTCGAGATG-1	TRUE	AATCGGTGTCGAGATG-1_contig_1	TRUE	705	TRB	TRBV20-1*02	TRBD1*01	TRBJ2-5*01	TRBC2*01	TRUE	TRUE	CSALKYLGAQETQYF	TGCAGTGCTTTAAAGTATTTGGGGGCCCAAGAGACCCAGTACTTC	19556	6	clonotype120	clonotype120_consensus_2	single TCR
AATCGGTGTCGAGATG-1	TRUE	AATCGGTGTCGAGATG-1_contig_3	TRUE	525	TRA	TRAV38-2/DV8*01	None	TRAJ45*01	TRAC*01	TRUE	TRUE	CAYRSPIWVGGGADGLTF	TGTGCTTATAGGAGCCCGATTTGGGTAGGAGGAGGTGCTGACGGACTCACCTTT	7576	2	clonotype120	clonotype120_consensus_1	single TCR
AATCGGTGTCTCTTAT-1	TRUE	AATCGGTGTCTCTTAT-1_contig_1	TRUE	667	TRA	TRAV8-3*01	None	TRAJ43*01	TRAC*01	TRUE	TRUE	CAVEDMRF	TGTGCTGTAGAGGACATGCGCTTT	2105	1	clonotype121	clonotype121_consensus_2	single TCR
AATCGGTGTCTCTTAT-1	TRUE	AATCGGTGTCTCTTAT-1_contig_2	TRUE	683	TRB	TRBV7-9*03	TRBD2*02	TRBJ2-1*01	TRBC1*01	TRUE	TRUE	CASSMTRGSGNEQFF	TGTGCCAGCAGCATGACTCGCGGGAGTGGCAATGAGCAGTTCTTC	7646	2	clonotype121	clonotype121_consensus_1	single TCR
ACACCAACATGATCCA-1	TRUE	ACACCAACATGATCCA-1_contig_1	TRUE	662	TRB	TRBV29-1*01	TRBD1*01	TRBJ2-5*01	TRBC2*01	TRUE	TRUE	CSVSSQRGVRETQYF	TGCAGTGTTTCTTCACAGAGGGGCGTTCGGGAGACCCAGTACTTC	4747	2	clonotype124	clonotype124_consensus_2	single TCR
ACACCAACATGATCCA-1	TRUE	ACACCAACATGATCCA-1_contig_2	TRUE	591	TRA	TRAV14/DV4*01	None	TRAJ9*01	TRAC*01	TRUE	TRUE	CAMREGGRTGGFKTIF	TGTGCAATGAGAGAGGGCGGTCGTACTGGAGGCTTCAAAACTATCTTT	2800	1	clonotype124	clonotype124_consensus_1	single TCR
ACACCAATCTTGCAAG-1	TRUE	ACACCAATCTTGCAAG-1_contig_1	TRUE	725	TRB	TRBV6-5*01	TRBD2*01	TRBJ1-6*01	TRBC1*01	TRUE	TRUE	CASSYKRGAGNSPLHF	TGTGCCAGCAGTTATAAAAGGGGCGCGGGGAATTCACCCCTCCACTTT	14280	5	clonotype4	clonotype4_consensus_1	single TCR
ACACCAATCTTGCAAG-1	TRUE	ACACCAATCTTGCAAG-1_contig_3	TRUE	567	TRA	TRAV19*01	None	TRAJ56*01	TRAC*01	TRUE	TRUE	CVTSSGANSKLTF	TGTGTCACTTCCTCTGGAGCCAATAGTAAGCTGACATTT	6371	2	clonotype4	clonotype4_consensus_2	single TCR
ACACCCTCATTCCTCG-1	TRUE	ACACCCTCATTCCTCG-1_contig_2	TRUE	687	TRB	TRBV27*01	TRBD2*02	TRBJ1-2*01	TRBC1*01	TRUE	TRUE	CASTTGRGAGYTF	TGTGCCAGCACCACAGGGAGGGGCGCGGGCTACACCTTC	6231	2	clonotype127	clonotype127_consensus_1	single TCR
ACACCCTCATTCCTCG-1	TRUE	ACACCCTCATTCCTCG-1_contig_3	TRUE	600	TRA	TRAV41*01	None	TRAJ58*01	TRAC*01	TRUE	TRUE	CAVGVRETSGSRLTF	TGTGCTGTCGGGGTGAGGGAAACCAGTGGCTCTAGGTTGACCTTT	7180	2	clonotype127	clonotype127_consensus_2	single TCR
ACACCCTTCATAAAGG-1	TRUE	ACACCCTTCATAAAGG-1_contig_1	TRUE	807	TRB	TRBV6-6*02	TRBD2*01	TRBJ2-7*01	TRBC1*01	TRUE	TRUE	CASSRDYSYEQYF	TGTGCCAGCAGCCGTGACTACTCCTACGAGCAGTACTTC	8289	3	clonotype128	clonotype128_consensus_2	single TCR
ACACCCTTCATAAAGG-1	TRUE	ACACCCTTCATAAAGG-1_contig_2	TRUE	572	TRA	TRAV22*01	None	TRAJ43*01	TRAC*01	TRUE	TRUE	CAVDPPYNNNDMRF	TGTGCTGTGGACCCACCCTACAATAACAATGACATGCGCTTT	2871	1	clonotype128	clonotype128_consensus_1	single TCR
ACACCCTTCGCATGAT-1	TRUE	ACACCCTTCGCATGAT-1_contig_1	TRUE	530	TRB	TRBV6-1*01	None	TRBJ1-5*01	TRBC1*01	TRUE	TRUE	CASKGGNQPQHF	TGTGCAAGCAAAGGAGGCAATCAGCCCCAGCATTTT	6009	2	clonotype129	clonotype129_consensus_1	single TCR
ACACCCTTCGCATGAT-1	TRUE	ACACCCTTCGCATGAT-1_contig_2	TRUE	536	TRA	TRAV13-1*01	None	TRAJ10*01	TRAC*01	TRUE	TRUE	CAASRGGGNKLTF	TGTGCAGCAAGTAGAGGAGGAGGAAACAAACTCACCTTT	14486	4	clonotype129	clonotype129_consensus_2	single TCR
ACACCGGAGAGTACCG-1	TRUE	ACACCGGAGAGTACCG-1_contig_1	TRUE	765	TRB	TRBV7-9*03	TRBD1*01	TRBJ2-1*01	TRBC2*01	TRUE	TRUE	CASSRLGSLVNEQFF	TGTGCCAGCAGCCGACTGGGTAGTCTGGTCAATGAGCAGTTCTTC	32782	9	clonotype130	clonotype130_consensus_1	single TCR
ACACCGGAGAGTACCG-1	TRUE	ACACCGGAGAGTACCG-1_contig_4	TRUE	569	TRA	TRAV26-1*01	None	TRAJ56*01	TRAC*01	TRUE	TRUE	CSPLDYTGANSKLTF	TGCAGTCCCCTCGATTATACTGGAGCCAATAGTAAGCTGACATTT	3637	1	clonotype130	clonotype130_consensus_2	single TCR
ACACCGGTCGCTGATA-1	TRUE	ACACCGGTCGCTGATA-1_contig_1	TRUE	546	TRA	TRAV12-2*01	None	TRAJ31*01	TRAC*01	TRUE	TRUE	CAVRNNNARLMF	TGTGCCGTACGGAATAACAATGCCAGACTCATGTTT	2343	1	clonotype132	clonotype132_consensus_1	single TCR
ACACCGGTCGCTGATA-1	TRUE	ACACCGGTCGCTGATA-1_contig_2	TRUE	687	TRB	TRBV4-2*01	TRBD2*02	TRBJ2-5*01	TRBC2*01	TRUE	TRUE	CASSQDAPAGGGGRETQYF	TGTGCCAGCAGCCAAGATGCACCAGCGGGAGGGGGGGGGCGAGAGACCCAGTACTTC	6652	3	clonotype132	clonotype132_consensus_2	single TCR
ACACTGACAACTGGCC-1	TRUE	ACACTGACAACTGGCC-1_contig_1	TRUE	705	TRB	TRBV11-2*03	TRBD2*01	TRBJ2-1*01	TRBC2*01	TRUE	TRUE	CASSLSFLRGLPYNEQFF	TGTGCCAGCAGCTTATCTTTTCTGCGGGGGTTACCCTACAATGAGCAGTTCTTC	20341	6	clonotype133	clonotype133_consensus_1	single TCR
ACACTGACAACTGGCC-1	TRUE	ACACTGACAACTGGCC-1_contig_2	TRUE	714	TRA	TRAV30*01	None	TRAJ45*01	TRAC*01	TRUE	TRUE	CGTPPRGSGGGADGLTF	TGTGGCACACCTCCACGGGGATCAGGAGGAGGTGCTGACGGACTCACCTTT	3522	2	clonotype133	clonotype133_consensus_2	single TCR
ACACTGAGTCTAGTCA-1	TRUE	ACACTGAGTCTAGTCA-1_contig_1	TRUE	685	TRA	TRAV8-3*01	None	TRAJ23*01	TRAC*01	TRUE	TRUE	CAVGARNQGGKLIF	TGTGCTGTGGGTGCACGGAACCAGGGAGGAAAGCTTATCTTC	6922	2	clonotype135	clonotype135_consensus_1	single TCR
ACACTGAGTCTAGTCA-1	TRUE	ACACTGAGTCTAGTCA-1_contig_2	TRUE	579	TRB	TRBV18*01	TRBD2*01	TRBJ2-5*01	TRBC2*01	TRUE	TRUE	CASSMGLGETQYF	TGTGCCAGCTCAATGGGACTAGGAGAGACCCAGTACTTC	6899	2	clonotype135	clonotype135_consensus_2	single TCR
ACAGCCGGTAAGCACG-1	TRUE	ACAGCCGGTAAGCACG-1_contig_3	TRUE	671	TRB	TRBV12-5*01	TRBD1*01	TRBJ1-5*01	TRBC1*01	TRUE	TRUE	CASGTGYSNQPQHF	TGTGCTAGTGGGACAGGGTACAGCAATCAGCCCCAGCATTTT	638	2	clonotype140	clonotype140_consensus_1	single TCR
ACAGCCGGTAAGCACG-1	TRUE	ACAGCCGGTAAGCACG-1_contig_4	TRUE	542	TRA	TRAV13-2*01	None	TRAJ43*01	TRAC*01	TRUE	TRUE	CAEIPQYNNNDMRF	TGTGCAGAGATCCCTCAGTACAATAACAATGACATGCGCTTT	4708	1	clonotype140	clonotype140_consensus_2	single TCR
ACAGCTAAGAGATGAG-1	TRUE	ACAGCTAAGAGATGAG-1_contig_1	TRUE	510	TRA	TRAV13-1*01	None	TRAJ23*01	TRAC*01	TRUE	TRUE	CAASRIYNQGGKLIF	TGTGCAGCAAGTAGGATTTATAACCAGGGAGGAAAGCTTATCTTC	8456	2	clonotype142	clonotype142_consensus_2	single TCR
ACAGCTAAGAGATGAG-1	TRUE	ACAGCTAAGAGATGAG-1_contig_2	TRUE	560	TRB	TRBV6-5*01	TRBD1*01	TRBJ2-7*01	TRBC2*01	TRUE	TRUE	CASSYSEVGDEQYF	TGTGCCAGCAGTTACTCGGAGGTGGGGGACGAGCAGTACTTC	7927	4	clonotype142	clonotype142_consensus_1	single TCR
ACAGCTAAGCCATCGC-1	TRUE	ACAGCTAAGCCATCGC-1_contig_1	TRUE	558	TRB	TRBV6-5*01	TRBD1*01	TRBJ1-1*01	TRBC1*01	TRUE	TRUE	CVARREPGAPNTEAFF	TGTGTCGCGCGAAGGGAGCCTGGGGCCCCGAACACTGAAGCTTTCTTT	6904	2	clonotype143	clonotype143_consensus_1	single TCR
ACAGCTAAGCCATCGC-1	TRUE	ACAGCTAAGCCATCGC-1_contig_2	TRUE	525	TRA	TRAV38-1*01	None	TRAJ45*01	TRAC*01	TRUE	TRUE	CAFMKRGADGLTF	TGTGCTTTCATGAAGCGGGGTGCTGACGGACTCACCTTT	3993	1	clonotype143	clonotype143_consensus_2	single TCR
ACAGCTAGTATCTGCA-1	TRUE	ACAGCTAGTATCTGCA-1_contig_1	TRUE	665	TRB	TRBV28*01	TRBD1*01	TRBJ2-3*01	TRBC1*01	TRUE	TRUE	CASSWGRGPDTQYF	TGTGCCAGCAGTTGGGGCAGGGGGCCAGATACGCAGTATTTT	6926	3	clonotype145	clonotype145_consensus_2	single TCR
ACAGCTAGTATCTGCA-1	TRUE	ACAGCTAGTATCTGCA-1_contig_4	TRUE	578	TRA	TRAV17*01	None	TRAJ30*01	TRAC*01	TRUE	TRUE	CAPVRDDKIIF	TGTGCTCCTGTTAGAGATGACAAGATCATCTTT	7372	2	clonotype145	clonotype145_consensus_1	single TCR
ACAGCTAGTGAAGGCT-1	TRUE	ACAGCTAGTGAAGGCT-1_contig_1	TRUE	692	TRB	TRBV14*01	None	TRBJ1-5*01	TRBC1*01	TRUE	TRUE	CASSQMNQPQHF	TGTGCCAGCAGCCAGATGAATCAGCCCCAGCATTTT	17167	6	clonotype146	clonotype146_consensus_1	single TCR
ACAGCTAGTGAAGGCT-1	TRUE	ACAGCTAGTGAAGGCT-1_contig_2	TRUE	447	TRA	TRAV12-2*01	None	TRAJ32*01	TRAC*01	TRUE	TRUE	CADYYGGATNKLIF	TGTGCCGATTATTATGGTGGTGCTACAAACAAGCTCATCTTT	3573	1	clonotype146	clonotype146_consensus_2	single TCR
ACAGCTATCGCCGTGA-1	TRUE	ACAGCTATCGCCGTGA-1_contig_1	TRUE	649	TRB	TRBV27*01	TRBD1*01	TRBJ2-7*01	TRBC2*01	TRUE	TRUE	CASSAPGGSHEQYF	TGTGCCAGCAGTGCCCCAGGTGGTTCCCACGAGCAGTACTTC	7222	3	clonotype148	clonotype148_consensus_2	single TCR
ACAGCTATCGCCGTGA-1	TRUE	ACAGCTATCGCCGTGA-1_contig_3	TRUE	762	TRA	TRAV29/DV5*01	None	TRAJ54*01	TRAC*01	TRUE	TRUE	CAANQGAQKLVF	TGTGCAGCAAACCAGGGAGCCCAGAAGCTGGTATTT	3672	1	clonotype148	clonotype148_consensus_1	single TCR
ACATACGTCTAGAGTC-1	TRUE	ACATACGTCTAGAGTC-1_contig_1	TRUE	550	TRA	TRAV13-2*01	None	TRAJ20*01	TRAC*01	TRUE	TRUE	CAEIDNDYKLSF	TGTGCAGAGATCGATAACGACTACAAGCTCAGCTTT	3734	1	clonotype151	clonotype151_consensus_2	single TCR
ACATACGTCTAGAGTC-1	TRUE	ACATACGTCTAGAGTC-1_contig_2	TRUE	708	TRB	TRBV5-1*01	TRBD2*01	TRBJ2-5*01	TRBC2*01	TRUE	TRUE	CASSLDRGIQETQYF	TGCGCCAGCAGCTTGGACCGGGGGATCCAAGAGACCCAGTACTTC	18830	7	clonotype151	clonotype151_consensus_1	single TCR
ACATCAGCATCGGACC-1	TRUE	ACATCAGCATCGGACC-1_contig_1	TRUE	733	TRB	TRBV15*01	TRBD1*01	TRBJ1-5*01	TRBC1*01	TRUE	TRUE	CATSRAGQGVHF	TGTGCCACCAGCAGAGCCGGACAGGGGGTCCATTTT	9529	4	clonotype154	clonotype154_consensus_2	single TCR
ACATCAGCATCGGACC-1	TRUE	ACATCAGCATCGGACC-1_contig_2	TRUE	497	TRA	TRAV10*01	None	TRAJ26*01	TRAC*01	TRUE	TRUE	CVVSGYNYGQNFVF	TGTGTGGTGAGCGGGTACAACTATGGTCAGAATTTTGTCTTT	2919	1	clonotype154	clonotype154_consensus_1	single TCR
ACATCAGTCGTCGTTC-1	TRUE	ACATCAGTCGTCGTTC-1_contig_1	TRUE	660	TRB	TRBV4-1*01	None	TRBJ1-1*01	TRBC1*01	TRUE	TRUE	CASSLGGENTEAFF	TGCGCCAGCAGCCTCGGCGGAGAGAACACTGAAGCTTTCTTT	15671	5	clonotype158	clonotype158_consensus_1	single TCR
ACATCAGTCGTCGTTC-1	TRUE	ACATCAGTCGTCGTTC-1_contig_2	TRUE	463	TRA	TRAV13-1*01	None	TRAJ9*01	TRAC*01	TRUE	TRUE	CAAPNTGGFKTIF	TGTGCAGCACCTAATACTGGAGGCTTCAAAACTATCTTT	4085	1	clonotype158	clonotype158_consensus_2	single TCR
ACATCAGTCTTTAGTC-1	TRUE	ACATCAGTCTTTAGTC-1_contig_1	TRUE	492	TRA	TRAV10*01	None	TRAJ30*01	TRAC*01	TRUE	TRUE	CVVSRRDDKIIF	TGTGTGGTGAGTCGAAGAGATGACAAGATCATCTTT	3806	1	clonotype159	clonotype159_consensus_2	single TCR
ACATCAGTCTTTAGTC-1	TRUE	ACATCAGTCTTTAGTC-1_contig_2	TRUE	822	TRB	TRBV19*01	TRBD2*02	TRBJ2-1*01	TRBC2*01	TRUE	TRUE	CASSLGTSGSSYNEQFF	TGTGCCAGTAGCCTAGGGACTAGCGGGAGCTCCTACAATGAGCAGTTCTTC	4560	3	clonotype159	clonotype159_consensus_1	single TCR
ACCAGTAAGAGGTTAT-1	TRUE	ACCAGTAAGAGGTTAT-1_contig_1	TRUE	645	TRA	TRAV8-3*01	None	TRAJ15*01	TRAC*01	TRUE	TRUE	CAVGADQAGTALIF	TGTGCTGTGGGTGCGGACCAGGCAGGAACTGCTCTGATCTTT	2609	1	clonotype162	clonotype162_consensus_1	single TCR
ACCAGTAAGAGGTTAT-1	TRUE	ACCAGTAAGAGGTTAT-1_contig_2	TRUE	640	TRB	TRBV12-5*01	TRBD1*01	TRBJ2-1*01	TRBC2*01	TRUE	TRUE	CATRARANVNEQFF	TGTGCTACGAGGGCCAGGGCAAATGTCAATGAGCAGTTCTTC	9411	3	clonotype162	clonotype162_consensus_2	single TCR
ACCAGTAGTAAAGGAG-1	TRUE	ACCAGTAGTAAAGGAG-1_contig_1	TRUE	505	TRB	TRBV5-1*01	TRBD2*01	TRBJ2-3*01	TRBC2*01	TRUE	TRUE	CASSLARGGTDTQYF	TGCGCCAGCAGCTTGGCGCGGGGGGGCACAGATACGCAGTATTTT	6366	2	clonotype163	clonotype163_consensus_1	single TCR
ACCAGTAGTAAAGGAG-1	TRUE	ACCAGTAGTAAAGGAG-1_contig_2	TRUE	659	TRA	TRAV8-4*01	None	TRAJ53*01	TRAC*01	TRUE	TRUE	CAVTANSGGSNYKLTF	TGTGCTGTGACCGCCAATAGTGGAGGTAGCAACTATAAACTGACATTT	3455	1	clonotype163	clonotype163_consensus_2	single TCR
ACCAGTAGTGCGAAAC-1	TRUE	ACCAGTAGTGCGAAAC-1_contig_1	TRUE	498	TRA	TRAV2*01	None	TRAJ28*01	TRAC*01	TRUE	TRUE	CAVEDKGYSGAGSYQLTF	TGTGCTGTGGAGGATAAGGGATACTCTGGGGCTGGGAGTTACCAACTCACTTTC	3405	1	clonotype164	clonotype164_consensus_1	single TCR
ACCAGTAGTGCGAAAC-1	TRUE	ACCAGTAGTGCGAAAC-1_contig_2	TRUE	696	TRB	TRBV6-5*01	TRBD2*01	TRBJ2-7*01	TRBC2*01	TRUE	TRUE	CASRPPGLRYEQYF	TGTGCCAGCAGACCTCCGGGACTGCGCTACGAGCAGTACTTC	15413	5	clonotype164	clonotype164_consensus_2	single TCR
ACCAGTATCTTACCGC-1	TRUE	ACCAGTATCTTACCGC-1_contig_1	TRUE	769	TRA	TRAV8-4*01	None	TRAJ8*01	TRAC*01	TRUE	TRUE	CAVRALWDNTGFQKLVF	TGTGCTGTGAGGGCCCTATGGGATAACACAGGCTTTCAGAAACTTGTATTT	7681	3	clonotype165	clonotype165_consensus_1	single TCR
ACCAGTATCTTACCGC-1	TRUE	ACCAGTATCTTACCGC-1_contig_3	TRUE	719	TRB	TRBV6-1*01	TRBD2*01	TRBJ2-1*01	TRBC2*01	TRUE	TRUE	CASSSSGLTYNEQFF	TGTGCCAGCAGTTCTAGCGGGCTAACCTACAATGAGCAGTTCTTC	22090	6	clonotype165	clonotype165_consensus_2	single TCR
ACCCACTAGCTAACTC-1	TRUE	ACCCACTAGCTAACTC-1_contig_1	TRUE	489	TRA	TRAV30*01	None	TRAJ27*01	TRAC*01	TRUE	TRUE	CGTEGSTNAGKSTF	TGTGGCACAGAGGGAAGCACCAATGCAGGCAAATCAACCTTT	8951	2	clonotype166	clonotype166_consensus_2	single TCR
ACCCACTAGCTAACTC-1	TRUE	ACCCACTAGCTAACTC-1_contig_2	TRUE	540	TRB	TRBV6-1*01	TRBD1*01	TRBJ2-6*01	TRBC2*01	TRUE	TRUE	CATDSTSGANVLTF	TGTGCCACCGACAGTACTTCTGGGGCCAACGTCCTGACTTTC	7237	2	clonotype166	clonotype166_consensus_1	single TCR
ACCCACTAGGATGCGT-1	TRUE	ACCCACTAGGATGCGT-1_contig_1	TRUE	670	TRA	TRAV12-1*01	None	TRAJ28*01	TRAC*01	TRUE	TRUE	CVVNKVGGSGAGSYQLTF	TGTGTGGTGAACAAAGTTGGTGGCTCTGGGGCTGGGAGTTACCAACTCACTTTC	11806	3	clonotype167	clonotype167_consensus_1	single TCR
ACCCACTAGGATGCGT-1	TRUE	ACCCACTAGGATGCGT-1_contig_2	TRUE	691	TRB	TRBV27*01	None	TRBJ1-2*01	TRBC1*01	TRUE	TRUE	CASSSSPVLYGYTF	TGTGCCAGCAGTTCTTCACCCGTCCTCTATGGCTACACCTTC	8063	2	clonotype167	clonotype167_consensus_2	single TCR
ACCCACTTCTCGTTTA-1	TRUE	ACCCACTTCTCGTTTA-1_contig_1	TRUE	755	TRB	TRBV18*01	TRBD1*01	TRBJ1-1*01	TRBC1*01	TRUE	TRUE	CASSQGPNTEAFF	TGTGCCAGCTCACAGGGGCCGAACACTGAAGCTTTCTTT	27221	10	clonotype169	clonotype169_consensus_1	single TCR
ACCCACTTCTCGTTTA-1	TRUE	ACCCACTTCTCGTTTA-1_contig_4	TRUE	575	TRA	TRAV25*01	None	TRAJ53*01	TRAC*01	TRUE	TRUE	CAFNSGGSNYKLTF	TGTGCATTTAATAGTGGAGGTAGCAACTATAAACTGACATTT	3281	2	clonotype169	clonotype169_consensus_2	single TCR
ACCCACTTCTGAGGGA-1	TRUE	ACCCACTTCTGAGGGA-1_contig_1	TRUE	733	TRB	TRBV6-1*01	None	TRBJ1-3*01	TRBC1*01	TRUE	TRUE	CASSEMPVSGNTIYF	TGTGCCAGCAGTGAAATGCCGGTCTCTGGAAACACCATATATTTT	4930	2	clonotype171	clonotype171_consensus_2	single TCR
ACCCACTTCTGAGGGA-1	TRUE	ACCCACTTCTGAGGGA-1_contig_3	TRUE	598	TRA	TRAV6*01	None	TRAJ45*01	TRAC*01	TRUE	TRUE	CASMYSGGGADGLTF	TGTGCTTCGATGTATTCAGGAGGAGGTGCTGACGGACTCACCTTT	3694	1	clonotype171	clonotype171_consensus_1	single TCR
ACCTTTACACACGCTG-1	TRUE	ACCTTTACACACGCTG-1_contig_1	TRUE	764	TRB	TRBV11-3*01	TRBD2*02	TRBJ2-1*01	TRBC2*01	TRUE	TRUE	CASSFLFGGSSYNEQFF	TGTGCCAGCAGCTTCTTGTTCGGCGGGAGCTCCTACAATGAGCAGTTCTTC	1428	1	clonotype176	clonotype176_consensus_1	single TCR
ACCTTTACACACGCTG-1	TRUE	ACCTTTACACACGCTG-1_contig_3	TRUE	532	TRA	TRAV23/DV6*01	None	TRAJ40*01	TRAC*01	TRUE	TRUE	CAATRSGTYKYIF	TGTGCAGCAACCCGCTCAGGAACCTACAAATACATCTTT	1855	1	clonotype176	clonotype176_consensus_2	single TCR
ACCTTTATCGAGGTAG-1	TRUE	ACCTTTATCGAGGTAG-1_contig_1	TRUE	645	TRB	TRBV28*01	TRBD1*01	TRBJ1-1*01	TRBC1*01	TRUE	TRUE	CASSPWTGVSTEAFF	TGTGCCAGCAGTCCATGGACAGGGGTAAGCACTGAAGCTTTCTTT	3281	1	clonotype177	clonotype177_consensus_2	single TCR
ACCTTTATCGAGGTAG-1	TRUE	ACCTTTATCGAGGTAG-1_contig_3	TRUE	556	TRA	TRAV12-3*01	None	TRAJ17*01	TRAC*01	TRUE	TRUE	CAMSVAAGNKLTF	TGTGCAATGAGCGTCGCTGCAGGCAACAAGCTAACTTTT	9398	3	clonotype177	clonotype177_consensus_1	single TCR
ACCTTTATCGCACTCT-1	TRUE	ACCTTTATCGCACTCT-1_contig_1	TRUE	722	TRB	TRBV6-6*02	None	TRBJ1-4*01	TRBC1*01	TRUE	TRUE	CASKQIRIGSATNEKLFF	TGTGCCAGCAAACAGATCCGGATCGGATCCGCAACTAATGAAAAACTGTTTTTT	16895	6	clonotype178	clonotype178_consensus_1	single TCR
ACCTTTATCGCACTCT-1	TRUE	ACCTTTATCGCACTCT-1_contig_2	TRUE	613	TRA	TRAV14/DV4*02	None	TRAJ31*01	TRAC*01	TRUE	TRUE	CAMREGYNNARLMF	TGTGCAATGAGAGAGGGCTATAACAATGCCAGACTCATGTTT	3093	2	clonotype178	clonotype178_consensus_2	single TCR
ACCTTTATCGCCGTGA-1	TRUE	ACCTTTATCGCCGTGA-1_contig_1	TRUE	493	TRA	TRAV10*01	None	TRAJ4*01	TRAC*01	TRUE	TRUE	CVVSGWDSGGYNKLIF	TGTGTGGTGAGCGGATGGGATTCTGGTGGCTACAATAAGCTGATTTTT	12195	3	clonotype179	clonotype179_consensus_2	single TCR
ACCTTTATCGCCGTGA-1	TRUE	ACCTTTATCGCCGTGA-1_contig_2	TRUE	666	TRB	TRBV19*01	TRBD2*01	TRBJ2-5*01	TRBC2*01	TRUE	TRUE	CASSGTLKETQYF	TGTGCCAGCTCCGGGACTCTAAAAGAGACCCAGTACTTC	10621	5	clonotype179	clonotype179_consensus_1	single TCR
ACCTTTATCGTAGGTT-1	TRUE	ACCTTTATCGTAGGTT-1_contig_2	TRUE	649	TRA	TRAV8-2*01	None	TRAJ31*01	TRAC*01	TRUE	TRUE	CVVSFRNNNARLMF	TGTGTTGTGAGCTTTCGGAATAACAATGCCAGACTCATGTTT	1639	1	clonotype1	clonotype1_consensus_2	single TCR
ACCTTTATCGTAGGTT-1	TRUE	ACCTTTATCGTAGGTT-1_contig_3	TRUE	508	TRB	TRBV11-2*03	None	TRBJ2-3*01	TRBC2*01	TRUE	TRUE	CASSLTPPDTQYF	TGTGCCAGCAGCCTTACCCCCCCGGATACGCAGTATTTT	4634	2	clonotype1	clonotype1_consensus_1	single TCR
ACGAGCCAGTGAAGTT-1	TRUE	ACGAGCCAGTGAAGTT-1_contig_1	TRUE	619	TRA	TRAV8-4*01	None	TRAJ45*01	TRAC*01	TRUE	TRUE	CSGGGADGLTF	TGTTCAGGAGGAGGTGCTGACGGACTCACCTTT	3999	1	clonotype180	clonotype180_consensus_1	single TCR
ACGAGCCAGTGAAGTT-1	TRUE	ACGAGCCAGTGAAGTT-1_contig_2	TRUE	488	TRB	TRBV29-1*01	TRBD2*02	TRBJ1-2*01	TRBC1*01	TRUE	TRUE	CSVVVGEGGYTF	TGCAGCGTTGTAGTTGGGGAGGGTGGCTACACCTTC	6096	2	clonotype180	clonotype180_consensus_2	single TCR
ACGAGCCGTCTCTCTG-1	TRUE	ACGAGCCGTCTCTCTG-1_contig_1	TRUE	589	TRB	TRBV6-5*01	TRBD2*01	TRBJ2-3*01	TRBC2*01	TRUE	TRUE	CASSSERGTQYF	TGTGCCAGCAGTTCTGAGCGGGGTACGCAGTATTTT	5964	2	clonotype182	clonotype182_consensus_2	single TCR
ACGAGCCGTCTCTCTG-1	TRUE	ACGAGCCGTCTCTCTG-1_contig_2	TRUE	576	TRA	TRAV29/DV5*01	None	TRAJ37*02	TRAC*01	TRUE	TRUE	CAASVSNTGKLIF	TGTGCAGCAAGCGTGAGCAACACAGGCAAACTAATCTTT	7127	3	clonotype182	clonotype182_consensus_1	single TCR
ACGAGCCGTTCCGGCA-1	TRUE	ACGAGCCGTTCCGGCA-1_contig_1	TRUE	685	TRB	TRBV7-9*01	None	TRBJ1-1*01	TRBC1*01	TRUE	TRUE	CASSAGTEAFF	TGTGCCAGCAGCGCCGGGACTGAAGCTTTCTTT	29466	7	clonotype183	clonotype183_consensus_2	single TCR
ACGAGCCGTTCCGGCA-1	TRUE	ACGAGCCGTTCCGGCA-1_contig_2	TRUE	742	TRA	TRAV12-3*01	None	TRAJ24*01	TRAC*01	TRUE	TRUE	CAITSTDSWGKFQF	TGTGCAATTACTTCAACTGACAGCTGGGGGAAATTCCAGTTT	6151	4	clonotype183	clonotype183_consensus_1	single TCR
ACGAGCCGTTCGCGAC-1	TRUE	ACGAGCCGTTCGCGAC-1_contig_1	TRUE	693	TRB	TRBV7-9*01	TRBD2*01	TRBJ2-1*01	TRBC2*01	TRUE	TRUE	CASSYLAGGMVNEQFF	TGTGCCAGCAGCTACCTAGCGGGGGGGATGGTAAATGAGCAGTTCTTC	18601	6	clonotype184	clonotype184_consensus_1	single TCR
ACGAGCCGTTCGCGAC-1	TRUE	ACGAGCCGTTCGCGAC-1_contig_3	TRUE	526	TRA	TRAV30*01	None	TRAJ53*01	TRAC*01	TRUE	TRUE	CGTEGLDSGGSNYKLTF	TGTGGCACAGAGGGGTTGGATAGTGGAGGTAGCAACTATAAACTGACATTT	3530	1	clonotype184	clonotype184_consensus_2	single TCR
ACGAGGATCGATAGAA-1	TRUE	ACGAGGATCGATAGAA-1_contig_1	TRUE	525	TRA	TRAV29/DV5*01	None	TRAJ42*01	TRAC*01	TRUE	TRUE	CAAKGRGGGSQGNLIF	TGTGCAGCAAAAGGGCGGGGTGGAGGAAGCCAAGGAAATCTCATCTTT	4216	1	clonotype189	clonotype189_consensus_2	single TCR
ACGAGGATCGATAGAA-1	TRUE	ACGAGGATCGATAGAA-1_contig_2	TRUE	805	TRB	TRBV19*01	TRBD2*02	TRBJ2-3*01	TRBC2*01	TRUE	TRUE	CASSILAGGTDTQYF	TGTGCCAGTAGTATTCTAGCGGGAGGCACAGATACGCAGTATTTT	3073	1	clonotype189	clonotype189_consensus_1	single TCR
ACGATACAGTGAAGAG-1	TRUE	ACGATACAGTGAAGAG-1_contig_1	TRUE	674	TRB	TRBV9*01	TRBD2*01	TRBJ2-1*01	TRBC2*01	TRUE	TRUE	CASSPTSGNEQFF	TGTGCCAGCAGCCCAACAAGCGGGAACGAGCAGTTCTTC	18972	6	clonotype192	clonotype192_consensus_1	single TCR
ACGATACAGTGAAGAG-1	TRUE	ACGATACAGTGAAGAG-1_contig_6	TRUE	518	TRA	TRAV23/DV6*01	None	TRAJ20*01	TRAC*01	TRUE	TRUE	CAASNYDYKLSF	TGTGCAGCAAGCAACTACGACTACAAGCTCAGCTTT	3805	1	clonotype192	clonotype192_consensus_2	single TCR
ACGATACCACATTCGA-1	TRUE	ACGATACCACATTCGA-1_contig_1	TRUE	607	TRA	TRAV27*01	None	TRAJ4*01	TRAC*01	TRUE	TRUE	CAGVAPLFSGGYNKLIF	TGTGCAGGAGTCGCCCCCTTGTTTTCTGGTGGCTACAATAAGCTGATTTTT	17224	5	clonotype193	clonotype193_consensus_2	single TCR
ACGATACCACATTCGA-1	TRUE	ACGATACCACATTCGA-1_contig_3	TRUE	901	TRB	TRBV28*01	TRBD2*02	TRBJ2-1*01	TRBC2*01	TRUE	TRUE	CASSSISGRDEQFF	TGTGCCAGCAGTTCAATTAGCGGGAGGGATGAGCAGTTCTTC	31879	10	clonotype193	clonotype193_consensus_1	single TCR
ACGATACCATGACGGA-1	TRUE	ACGATACCATGACGGA-1_contig_1	TRUE	710	TRB	TRBV20-1*02	TRBD2*01	TRBJ2-3*01	TRBC2*01	TRUE	TRUE	CSARVSSGGTDTQYF	TGCAGTGCTAGAGTATCAAGCGGGGGCACAGATACGCAGTATTTT	10934	4	clonotype195	clonotype195_consensus_2	single TCR
ACGATACCATGACGGA-1	TRUE	ACGATACCATGACGGA-1_contig_2	TRUE	694	TRA	TRAV3*01	None	TRAJ5*01	TRAC*01	TRUE	TRUE	CAVRDGRRDTGRRALTF	TGTGCTGTGAGAGACGGTCGTAGGGACACGGGCAGGAGAGCACTTACTTTT	9975	3	clonotype195	clonotype195_consensus_1	single TCR
ACGATGTCACTAAGTC-1	TRUE	ACGATGTCACTAAGTC-1_contig_1	TRUE	563	TRA	TRAV27*01	None	TRAJ23*01	TRAC*01	TRUE	TRUE	CAGVRNQGGKLIF	TGTGCAGGAGTAAGGAACCAGGGAGGAAAGCTTATCTTC	10809	4	clonotype197	clonotype197_consensus_1	single TCR
ACGATGTCACTAAGTC-1	TRUE	ACGATGTCACTAAGTC-1_contig_3	TRUE	482	TRB	TRBV10-2*01	TRBD1*01	TRBJ1-6*02	TRBC1*01	TRUE	TRUE	CASSYQGDNSPLHF	TGCGCCAGCAGTTACCAGGGTGATAATTCACCCCTCCACTTT	3593	1	clonotype197	clonotype197_consensus_2	single TCR
ACGATGTCAGCGTAAG-1	TRUE	ACGATGTCAGCGTAAG-1_contig_1	TRUE	702	TRB	TRBV7-6*01	TRBD2*01	TRBJ2-1*01	TRBC2*01	TRUE	TRUE	CASSSPSGGPSGTSEFEQFF	TGTGCCAGCAGCTCTCCATCTGGGGGGCCTTCAGGGACTAGCGAGTTTGAGCAGTTCTTC	37265	13	clonotype198	clonotype198_consensus_2	single TCR
ACGATGTCAGCGTAAG-1	TRUE	ACGATGTCAGCGTAAG-1_contig_2	TRUE	476	TRA	TRAV13-1*01	None	TRAJ50*01	TRAC*01	TRUE	TRUE	CAASTTSYDKVIF	TGTGCAGCAAGTACAACCTCCTACGACAAGGTGATATTT	2936	1	clonotype198	clonotype198_consensus_1	single TCR
ACGATGTTCGGTTAAC-1	TRUE	ACGATGTTCGGTTAAC-1_contig_1	TRUE	668	TRB	TRBV4-2*01	TRBD2*02	TRBJ2-2*01	TRBC2*01	TRUE	TRUE	CASSQDSEREGGELFF	TGTGCCAGCAGCCAAGATTCCGAGCGGGAAGGCGGGGAGCTGTTTTTT	13202	4	clonotype199	clonotype199_consensus_1	single TCR
ACGATGTTCGGTTAAC-1	TRUE	ACGATGTTCGGTTAAC-1_contig_3	TRUE	509	TRA	TRAV38-2/DV8*01	None	TRAJ53*01	TRAC*01	TRUE	TRUE	CAYRSAGGSNYKLTF	TGTGCTTATAGGAGCGCGGGAGGTAGCAACTATAAACTGACATTT	7747	2	clonotype199	clonotype199_consensus_2	single TCR
ACGCAGCAGGGTCGAT-1	TRUE	ACGCAGCAGGGTCGAT-1_contig_1	TRUE	550	TRA	TRAV14/DV4*01	None	TRAJ49*01	TRAC*01	TRUE	TRUE	CAMREYTGNQFYF	TGTGCAATGAGAGAGTATACCGGTAACCAGTTCTATTTT	3406	1	clonotype200	clonotype200_consensus_1	single TCR
ACGCAGCAGGGTCGAT-1	TRUE	ACGCAGCAGGGTCGAT-1_contig_2	TRUE	659	TRB	TRBV5-1*01	TRBD1*01	TRBJ1-1*01	TRBC1*01	TRUE	TRUE	CASSLAGERNTEAFF	TGCGCCAGCAGCTTGGCAGGGGAGAGGAACACTGAAGCTTTCTTT	3006	1	clonotype200	clonotype200_consensus_2	single TCR
ACGCAGCAGTAACCCT-1	TRUE	ACGCAGCAGTAACCCT-1_contig_1	TRUE	715	TRB	TRBV28*01	TRBD2*02	TRBJ2-1*01	TRBC2*01	TRUE	TRUE	CASSRHGVGDINEQFF	TGTGCCAGCAGCAGACACGGAGTGGGAGATATCAATGAGCAGTTCTTC	10663	2	clonotype201	clonotype201_consensus_2	single TCR
ACGCAGCAGTAACCCT-1	TRUE	ACGCAGCAGTAACCCT-1_contig_2	TRUE	518	TRA	TRAV29/DV5*01	None	TRAJ8*01	TRAC*01	TRUE	TRUE	CAASPQTGFQKLVF	TGTGCAGCAAGCCCTCAAACAGGCTTTCAGAAACTTGTATTT	4146	1	clonotype201	clonotype201_consensus_1	single TCR
ACGCAGCTCACTGGGC-1	TRUE	ACGCAGCTCACTGGGC-1_contig_1	TRUE	640	TRA	TRAV8-6*01	None	TRAJ48*01	TRAC*01	TRUE	TRUE	CAVKSVFGNEKLTF	TGTGCTGTGAAATCAGTCTTTGGAAATGAGAAATTAACCTTT	9646	3	clonotype204	clonotype204_consensus_2	single TCR
ACGCAGCTCACTGGGC-1	TRUE	ACGCAGCTCACTGGGC-1_contig_2	TRUE	842	TRB	TRBV5-6*01	None	TRBJ2-4*01	TRBC2*01	TRUE	TRUE	CASSFPEWMGGNIQYF	TGTGCCAGCAGCTTTCCTGAGTGGATGGGCGGAAACATTCAGTACTTC	2840	1	clonotype204	clonotype204_consensus_1	single TCR
ACGCAGCTCCGTACAA-1	TRUE	ACGCAGCTCCGTACAA-1_contig_1	TRUE	567	TRB	TRBV12-3*01	TRBD1*01	TRBJ1-4*01	TRBC1*01	TRUE	TRUE	CASSETGAWREKLFF	TGTGCCAGCAGTGAAACAGGGGCTTGGAGAGAAAAACTGTTTTTT	13088	4	clonotype205	clonotype205_consensus_1	single TCR
ACGCAGCTCCGTACAA-1	TRUE	ACGCAGCTCCGTACAA-1_contig_3	TRUE	651	TRA	TRAV8-4*01	None	TRAJ42*01	TRAC*01	TRUE	TRUE	CALTGGSQGNLIF	TGTGCTCTCACTGGAGGAAGCCAAGGAAATCTCATCTTT	3868	1	clonotype205	clonotype205_consensus_2	single TCR
ACGCCGACAAGACGTG-1	TRUE	ACGCCGACAAGACGTG-1_contig_2	TRUE	693	TRB	TRBV6-5*01	TRBD1*01	TRBJ1-2*01	TRBC1*01	TRUE	TRUE	CASSTTGGYGYTF	TGTGCCAGCAGCACGACAGGGGGCTATGGCTACACCTTC	3900	2	clonotype211	clonotype211_consensus_1	single TCR
ACGCCGACAAGACGTG-1	TRUE	ACGCCGACAAGACGTG-1_contig_3	TRUE	561	TRA	TRAV12-3*01	None	TRAJ17*01	TRAC*01	TRUE	TRUE	CAMSRVRTAGNKLTF	TGTGCAATGAGCCGCGTTCGGACTGCAGGCAACAAGCTAACTTTT	3760	1	clonotype211	clonotype211_consensus_2	single TCR
ACGCCGACAAGTCATC-1	TRUE	ACGCCGACAAGTCATC-1_contig_1	TRUE	706	TRB	TRBV27*01	TRBD1*01	TRBJ2-2*01	TRBC2*01	TRUE	TRUE	CASSRPVGQGVAGELFF	TGTGCCAGCAGTCGCCCCGTAGGACAGGGGGTTGCCGGGGAGCTGTTTTTT	8127	2	clonotype212	clonotype212_consensus_1	single TCR
ACGCCGACAAGTCATC-1	TRUE	ACGCCGACAAGTCATC-1_contig_3	TRUE	679	TRA	TRAV8-3*01	None	TRAJ48*01	TRAC*01	TRUE	TRUE	CAVGAKGNEKLTF	TGTGCTGTGGGTGCGAAGGGAAATGAGAAATTAACCTTT	6349	2	clonotype212	clonotype212_consensus_2	single TCR
ACGCCGAGTAAATGAC-1	TRUE	ACGCCGAGTAAATGAC-1_contig_1	TRUE	719	TRB	TRBV19*01	TRBD2*01	TRBJ2-3*01	TRBC2*01	TRUE	TRUE	CASSATSGDTDTQYF	TGTGCCAGTAGTGCGACTAGCGGGGACACAGATACGCAGTATTTT	5288	2	clonotype213	clonotype213_consensus_1	single TCR
ACGCCGAGTAAATGAC-1	TRUE	ACGCCGAGTAAATGAC-1_contig_2	TRUE	504	TRA	TRAV25*01	None	TRAJ29*01	TRAC*01	TRUE	TRUE	CAAQGLVF	TGTGCCGCGCAAGGTCTTGTCTTT	3904	1	clonotype213	clonotype213_consensus_2	single TCR
ACGGAGAGTCTTCTCG-1	TRUE	ACGGAGAGTCTTCTCG-1_contig_1	TRUE	701	TRB	TRBV13*01	TRBD1*01	TRBJ2-7*01	TRBC2*01	TRUE	TRUE	CASSFRTGMSYEQYF	TGTGCCAGCAGTTTTCGGACAGGGATGTCTTACGAGCAGTACTTC	20020	7	clonotype216	clonotype216_consensus_1	single TCR
ACGGAGAGTCTTCTCG-1	TRUE	ACGGAGAGTCTTCTCG-1_contig_2	TRUE	481	TRA	TRAV21*01	None	TRAJ17*01	TRAC*01	TRUE	TRUE	CAVKAAGNKLTF	TGTGCTGTGAAAGCTGCAGGCAACAAGCTAACTTTT	7928	2	clonotype216	clonotype216_consensus_2	single TCR
ACGGAGATCAATCACG-1	TRUE	ACGGAGATCAATCACG-1_contig_1	TRUE	578	TRA	TRAV1-2*01	None	TRAJ18*01	TRAC*01	TRUE	TRUE	CAGPADRGSTLGRLYF	TGTGCTGGGCCGGCCGACAGAGGCTCAACCCTGGGGAGGCTATACTTT	7326	3	clonotype217	clonotype217_consensus_1	single TCR
ACGGAGATCAATCACG-1	TRUE	ACGGAGATCAATCACG-1_contig_2	TRUE	704	TRB	TRBV7-2*02	TRBD2*01	TRBJ2-1*01	TRBC2*01	TRUE	TRUE	CASSSTSGLAGFSYNEQFF	TGTGCCAGCAGCTCGACCTCGGGACTAGCGGGCTTCTCCTACAATGAGCAGTTCTTC	18824	6	clonotype217	clonotype217_consensus_2	single TCR
ACGGCCAAGATGGCGT-1	TRUE	ACGGCCAAGATGGCGT-1_contig_1	TRUE	665	TRB	TRBV4-1*01	TRBD1*01	TRBJ2-1*01	TRBC1*01	TRUE	TRUE	CASSQQPGYSNEQFF	TGCGCCAGCAGCCAACAACCAGGGTATAGCAATGAGCAGTTCTTC	6410	2	clonotype219	clonotype219_consensus_2	single TCR
ACGGCCAAGATGGCGT-1	TRUE	ACGGCCAAGATGGCGT-1_contig_4	TRUE	570	TRA	TRAV19*01	None	TRAJ49*01	TRAC*01	TRUE	TRUE	CALYTLDTGNQFYF	TGTGCTCTATATACTCTTGACACCGGTAACCAGTTCTATTTT	6200	2	clonotype219	clonotype219_consensus_1	single TCR
ACGGCCAAGGCTCAGA-1	TRUE	ACGGCCAAGGCTCAGA-1_contig_1	TRUE	673	TRB	TRBV5-1*01	TRBD2*01	TRBJ2-1*01	TRBC2*01	TRUE	TRUE	CASSSETSLVSHEQFF	TGCGCCAGCAGCTCAGAGACTAGCTTAGTTTCCCATGAGCAGTTCTTC	6352	2	clonotype221	clonotype221_consensus_2	single TCR
ACGGCCAAGGCTCAGA-1	TRUE	ACGGCCAAGGCTCAGA-1_contig_3	TRUE	569	TRA	TRAV23/DV6*01	None	TRAJ40*01	TRAC*01	TRUE	TRUE	CAARATSGTYKYIF	TGTGCAGCAAGAGCTACCTCAGGAACCTACAAATACATCTTT	6639	2	clonotype221	clonotype221_consensus_1	single TCR
ACGGCCACAAGGACTG-1	TRUE	ACGGCCACAAGGACTG-1_contig_1	TRUE	654	TRB	TRBV10-3*01	TRBD1*01	TRBJ1-2*01	TRBC1*01	TRUE	TRUE	CATGQGGDGYTF	TGTGCCACGGGACAGGGGGGAGATGGCTACACCTTC	51153	17	clonotype223	clonotype223_consensus_1	single TCR
ACGGCCACAAGGACTG-1	TRUE	ACGGCCACAAGGACTG-1_contig_4	TRUE	574	TRA	TRAV8-1*01	None	TRAJ15*01	TRAC*01	TRUE	TRUE	CAVNQAGTALIF	TGTGCCGTGAACCAGGCAGGAACTGCTCTGATCTTT	4089	1	clonotype223	clonotype223_consensus_2	single TCR
ACGGCCACATTTGCTT-1	TRUE	ACGGCCACATTTGCTT-1_contig_1	TRUE	696	TRA	TRAV3*01	None	TRAJ34*01	TRAC*01	TRUE	TRUE	CAVSQLIPDKLIF	TGTGCTGTGAGTCAACTCATCCCCGACAAGCTCATCTTT	13457	3	clonotype225	clonotype225_consensus_1	single TCR
ACGGCCACATTTGCTT-1	TRUE	ACGGCCACATTTGCTT-1_contig_3	TRUE	649	TRB	TRBV28*01	TRBD1*01	TRBJ1-1*01	TRBC1*01	TRUE	TRUE	CASSLAAVGANTEAFF	TGTGCCAGCAGTTTAGCGGCCGTCGGGGCGAACACTGAAGCTTTCTTT	6928	3	clonotype225	clonotype225_consensus_2	single TCR
ACGGCCATCTTCTGGC-1	TRUE	ACGGCCATCTTCTGGC-1_contig_3	TRUE	709	TRB	TRBV18*01	TRBD1*01	TRBJ2-7*01	TRBC2*01	TRUE	TRUE	CASSPLIGDRVVYEQYF	TGTGCCAGCTCACCCTTAATTGGAGACAGGGTAGTTTACGAGCAGTACTTC	2715	1	clonotype227	clonotype227_consensus_2	single TCR
ACGGCCATCTTCTGGC-1	TRUE	ACGGCCATCTTCTGGC-1_contig_5	TRUE	528	TRA	TRAV29/DV5*01	None	TRAJ28*01	TRAC*01	TRUE	TRUE	CAASHFDSGAGSYQLTF	TGTGCAGCAAGCCACTTCGATTCTGGGGCTGGGAGTTACCAACTCACTTTC	3905	1	clonotype227	clonotype227_consensus_1	single TCR
ACGGGCTTCAACCAAC-1	TRUE	ACGGGCTTCAACCAAC-1_contig_1	TRUE	663	TRB	TRBV5-1*01	TRBD1*01	TRBJ1-4*01	TRBC1*01	TRUE	TRUE	CASSLTGGVDEKLFF	TGCGCCAGCAGCTTGACAGGGGGCGTCGATGAAAAACTGTTTTTT	6199	2	clonotype228	clonotype228_consensus_2	single TCR
ACGGGCTTCAACCAAC-1	TRUE	ACGGGCTTCAACCAAC-1_contig_3	TRUE	682	TRA	TRAV8-3*01	None	TRAJ6*01	TRAC*01	TRUE	TRUE	CAVGKGGSYIPTF	TGTGCTGTGGGTAAAGGAGGAAGCTACATACCTACATTT	2854	1	clonotype228	clonotype228_consensus_1	single TCR
ACGGGTCAGAATCTCC-1	TRUE	ACGGGTCAGAATCTCC-1_contig_1	TRUE	854	TRB	TRBV19*01	None	TRBJ2-7*01	TRBC2*01	TRUE	TRUE	CASSSPHDSYEQYF	TGTGCCAGTAGTTCGCCCCACGACTCCTACGAGCAGTACTTC	4802	2	clonotype231	clonotype231_consensus_1	single TCR
ACGGGTCAGAATCTCC-1	TRUE	ACGGGTCAGAATCTCC-1_contig_5	TRUE	513	TRA	TRAV26-1*01	None	TRAJ27*01	TRAC*01	TRUE	TRUE	CIVRVGKRGTNAGKSTF	TGCATCGTCAGAGTCGGAAAGAGGGGAACCAATGCAGGCAAATCAACCTTT	1240	1	clonotype231	clonotype231_consensus_2	single TCR
ACGGGTCAGGGCTTGA-1	TRUE	ACGGGTCAGGGCTTGA-1_contig_1	TRUE	581	TRA	TRAV14/DV4*01	None	TRAJ9*01	TRAC*01	TRUE	TRUE	CAMREGSGFKTIF	TGTGCAATGAGAGAGGGCAGTGGCTTCAAAACTATCTTT	13664	3	clonotype233	clonotype233_consensus_2	single TCR
ACGGGTCAGGGCTTGA-1	TRUE	ACGGGTCAGGGCTTGA-1_contig_2	TRUE	580	TRB	TRBV6-2*01	TRBD2*01	TRBJ2-3*01	TRBC2*01	TRUE	TRUE	CASSLPEDVAGGLTDTQYF	TGTGCCAGCAGTCTACCGGAAGATGTAGCGGGGGGGCTCACAGATACGCAGTATTTT	10206	4	clonotype233	clonotype233_consensus_1	single TCR
ACGGGTCGTGGCGAAT-1	TRUE	ACGGGTCGTGGCGAAT-1_contig_1	TRUE	589	TRA	TRAV41*01	None	TRAJ33*01	TRAC*01	TRUE	TRUE	CAVFMDSNYQLIW	TGTGCTGTCTTCATGGATAGCAACTATCAGTTAATCTGG	9428	3	clonotype237	clonotype237_consensus_2	single TCR
ACGGGTCGTGGCGAAT-1	TRUE	ACGGGTCGTGGCGAAT-1_contig_2	TRUE	655	TRB	TRBV19*01	None	TRBJ2-4*01	TRBC2*01	TRUE	TRUE	CASSMVYGAKNIQYF	TGTGCCAGTAGTATGGTTTACGGGGCCAAAAACATTCAGTACTTC	5506	2	clonotype237	clonotype237_consensus_1	single TCR
ACGGGTCGTTGTGGCC-1	TRUE	ACGGGTCGTTGTGGCC-1_contig_1	TRUE	687	TRB	TRBV5-1*01	TRBD1*01	TRBJ1-1*01	TRBC1*01	TRUE	TRUE	CASSSNRDRGTNTEAFF	TGCGCCAGCAGCTCGAACCGGGACAGGGGAACGAACACTGAAGCTTTCTTT	24957	8	clonotype238	clonotype238_consensus_1	single TCR
ACGGGTCGTTGTGGCC-1	TRUE	ACGGGTCGTTGTGGCC-1_contig_3	TRUE	680	TRA	TRAV8-3*01	None	TRAJ39*01	TRAC*01	TRUE	TRUE	CAVDRLNAGNMLTF	TGTGCTGTGGACCGTCTGAATGCAGGCAACATGCTCACCTTT	2879	1	clonotype238	clonotype238_consensus_2	single TCR
ACGTCAAAGACTAGAT-1	TRUE	ACGTCAAAGACTAGAT-1_contig_1	TRUE	899	TRB	TRBV5-6*01	TRBD1*01	TRBJ1-1*01	TRBC1*01	TRUE	TRUE	CASSSSPRVGFEAFF	TGTGCCAGCAGCTCCTCGCCCAGGGTGGGGTTTGAAGCTTTCTTT	17250	7	clonotype240	clonotype240_consensus_2	single TCR
ACGTCAAAGACTAGAT-1	TRUE	ACGTCAAAGACTAGAT-1_contig_2	TRUE	734	TRA	TRAV13-2*01	None	TRAJ23*01	TRAC*01	TRUE	TRUE	CAESYNQGGKLIF	TGTGCAGAGAGTTATAACCAGGGAGGAAAGCTTATCTTC	7508	2	clonotype240	clonotype240_consensus_1	single TCR
ACGTCAAAGTGCCATT-1	TRUE	ACGTCAAAGTGCCATT-1_contig_1	TRUE	537	TRA	TRAV26-1*01	None	TRAJ45*01	TRAC*01	TRUE	TRUE	CIVRDNSGGGADGLTF	TGCATCGTCAGAGATAATTCAGGAGGAGGTGCTGACGGACTCACCTTT	3470	1	clonotype242	clonotype242_consensus_1	single TCR
ACGTCAAAGTGCCATT-1	TRUE	ACGTCAAAGTGCCATT-1_contig_2	TRUE	524	TRB	TRBV10-2*01	TRBD2*01	TRBJ2-3*01	TRBC2*01	TRUE	TRUE	CASSLAGASTDTQYF	TGCGCCAGCAGCCTAGCGGGGGCGAGCACAGATACGCAGTATTTT	13448	4	clonotype242	clonotype242_consensus_2	single TCR
ACGTCAAAGTGTCTCA-1	TRUE	ACGTCAAAGTGTCTCA-1_contig_1	TRUE	683	TRB	TRBV7-2*02	None	TRBJ1-5*01	TRBC1*01	TRUE	TRUE	CASSPRPGGNQPQHF	TGTGCCAGCAGCCCCCGCCCCGGAGGCAATCAGCCCCAGCATTTT	15303	7	clonotype243	clonotype243_consensus_2	single TCR
ACGTCAAAGTGTCTCA-1	TRUE	ACGTCAAAGTGTCTCA-1_contig_2	TRUE	498	TRA	TRAV9-2*01	None	TRAJ3*01	TRAC*01	TRUE	TRUE	CALSEVSSASKIIF	TGTGCTCTGAGTGAGGTCAGCAGTGCTTCCAAGATAATCTTT	6442	2	clonotype243	clonotype243_consensus_1	single TCR
ACGTCAAGTTGGGACA-1	TRUE	ACGTCAAGTTGGGACA-1_contig_2	TRUE	656	TRB	TRBV2*01	TRBD2*02	TRBJ1-4*01	TRBC1*01	TRUE	TRUE	CASNNRGGWEKLFF	TGTGCCAGCAACAATAGGGGAGGTTGGGAAAAACTGTTTTTT	6885	2	clonotype245	clonotype245_consensus_1	single TCR
ACGTCAAGTTGGGACA-1	TRUE	ACGTCAAGTTGGGACA-1_contig_4	TRUE	573	TRA	TRAV19*01	None	TRAJ20*01	TRAC*01	TRUE	TRUE	CALSEARSNDYKLSF	TGTGCTCTGAGTGAGGCCCGTTCTAACGACTACAAGCTCAGCTTT	2020	1	clonotype245	clonotype245_consensus_2	single TCR
ACGTCAATCGGCATCG-1	TRUE	ACGTCAATCGGCATCG-1_contig_1	TRUE	565	TRB	TRBV3-1*01	None	TRBJ1-1*01	TRBC1*01	TRUE	TRUE	CASSRFGSEVSEAFF	TGTGCCAGCAGCCGGTTCGGCAGTGAGGTGTCTGAAGCTTTCTTT	9694	3	clonotype247	clonotype247_consensus_2	single TCR
ACGTCAATCGGCATCG-1	TRUE	ACGTCAATCGGCATCG-1_contig_2	TRUE	553	TRA	TRAV26-1*01	None	TRAJ53*01	TRAC*01	TRUE	TRUE	CIVAYSGGSNYKLTF	TGCATCGTTGCATATAGTGGAGGTAGCAACTATAAACTGACATTT	2916	1	clonotype247	clonotype247_consensus_1	single TCR
ACTATCTCACTACAGT-1	TRUE	ACTATCTCACTACAGT-1_contig_1	TRUE	834	TRB	TRBV30*01	TRBD1*01	TRBJ2-3*01	TRBC2*01	TRUE	TRUE	CAWSVTGMGTDTQYF	TGTGCCTGGAGTGTCACAGGGATGGGCACAGATACGCAGTATTTT	17309	6	clonotype249	clonotype249_consensus_1	single TCR
ACTATCTCACTACAGT-1	TRUE	ACTATCTCACTACAGT-1_contig_2	TRUE	603	TRA	TRAV8-4*01	None	TRAJ7*01	TRAC*01	TRUE	TRUE	CAVTNRLAF	TGTGCTGTGACCAACAGACTCGCTTTT	3387	1	clonotype249	clonotype249_consensus_2	single TCR
ACTATCTGTCATCGGC-1	TRUE	ACTATCTGTCATCGGC-1_contig_1	TRUE	515	TRB	TRBV27*01	None	TRBJ2-1*01	TRBC2*01	TRUE	TRUE	CASSLATTTREQFF	TGTGCCAGCAGTTTGGCGACCACTACTCGCGAGCAGTTCTTC	3221	1	clonotype250	clonotype250_consensus_2	single TCR
ACTATCTGTCATCGGC-1	TRUE	ACTATCTGTCATCGGC-1_contig_2	TRUE	645	TRA	TRAV8-3*01	None	TRAJ11*01	TRAC*01	TRUE	TRUE	CAVGAPSGYSTLTF	TGTGCTGTGGGTGCCCCGTCAGGATACAGCACCCTCACCTTT	4696	2	clonotype250	clonotype250_consensus_1	single TCR
ACTATCTTCGCTTGTC-1	TRUE	ACTATCTTCGCTTGTC-1_contig_1	TRUE	452	TRA	TRAV2*01	None	TRAJ29*01	TRAC*01	TRUE	TRUE	CAVEDSGNTPLVF	TGTGCTGTGGAGGACTCAGGAAACACACCTCTTGTCTTT	5659	2	clonotype251	clonotype251_consensus_1	single TCR
ACTATCTTCGCTTGTC-1	TRUE	ACTATCTTCGCTTGTC-1_contig_2	TRUE	731	TRB	TRBV19*01	TRBD1*01	TRBJ2-7*01	TRBC2*01	TRUE	TRUE	CASSIDVGPTYEQYF	TGTGCCAGTAGTATAGATGTGGGGCCCACATACGAGCAGTACTTC	6060	2	clonotype251	clonotype251_consensus_2	single TCR
ACTATCTTCTTGGGTA-1	TRUE	ACTATCTTCTTGGGTA-1_contig_1	TRUE	699	TRB	TRBV20-1*02	TRBD1*01	TRBJ2-5*01	TRBC2*01	TRUE	TRUE	CSAHPVTGEETQYF	TGCAGTGCCCACCCGGTCACAGGAGAAGAGACCCAGTACTTC	17492	7	clonotype252	clonotype252_consensus_1	single TCR
ACTATCTTCTTGGGTA-1	TRUE	ACTATCTTCTTGGGTA-1_contig_2	TRUE	473	TRA	TRAV5*01	None	TRAJ26*01	TRAC*01	TRUE	TRUE	CAESIRNGQNFVF	TGTGCAGAGAGTATAAGAAATGGTCAGAATTTTGTCTTT	4163	1	clonotype252	clonotype252_consensus_2	single TCR
ACTGAACCAAGTTGTC-1	TRUE	ACTGAACCAAGTTGTC-1_contig_1	TRUE	771	TRA	TRAV19*01	None	TRAJ52*01	TRAC*01	TRUE	TRUE	CALSEPAGGTSYGKLTF	TGTGCTCTGAGTGAGCCTGCTGGTGGTACTAGCTATGGAAAGCTGACATTT	3173	1	clonotype254	clonotype254_consensus_1	single TCR
ACTGAACCAAGTTGTC-1	TRUE	ACTGAACCAAGTTGTC-1_contig_2	TRUE	582	TRB	TRBV2*01	TRBD2*01	TRBJ2-6*01	TRBC2*01	TRUE	TRUE	CASSDLPGTGANVLTF	TGTGCCAGCAGTGACCTTCCGGGGACTGGGGCCAACGTCCTGACTTTC	21765	7	clonotype254	clonotype254_consensus_2	single TCR
ACTGAACCATGCAATC-1	TRUE	ACTGAACCATGCAATC-1_contig_1	TRUE	468	TRA	TRAV41*01	None	TRAJ53*01	TRAC*01	TRUE	TRUE	CAVSSGGSNYKLTF	TGTGCTGTCAGCAGTGGAGGTAGCAACTATAAACTGACATTT	4397	1	clonotype256	clonotype256_consensus_1	single TCR
ACTGAACCATGCAATC-1	TRUE	ACTGAACCATGCAATC-1_contig_2	TRUE	856	TRB	TRBV9*01	TRBD2*01	TRBJ2-5*01	TRBC1*01	TRUE	TRUE	CASSVVGVSQETQYF	TGTGCCAGCAGCGTAGTCGGGGTGTCACAAGAGACCCAGTACTTC	2589	1	clonotype256	clonotype256_consensus_2	single TCR
ACTGAACGTCCCTTGT-1	TRUE	ACTGAACGTCCCTTGT-1_contig_1	TRUE	725	TRA	TRAV27*01	None	TRAJ23*01	TRAC*01	TRUE	TRUE	CAGDSYNQGGKLIF	TGTGCAGGAGATTCTTATAACCAGGGAGGAAAGCTTATCTTC	6251	3	clonotype257	clonotype257_consensus_2	single TCR
ACTGAACGTCCCTTGT-1	TRUE	ACTGAACGTCCCTTGT-1_contig_2	TRUE	525	TRB	TRBV20-1*02	None	TRBJ2-3*01	TRBC2*01	TRUE	TRUE	CSASVGPVRDTQYF	TGCAGTGCTAGTGTCGGTCCGGTCAGAGATACGCAGTATTTT	3225	1	clonotype257	clonotype257_consensus_1	single TCR
ACTGAACGTCTTGTCC-1	TRUE	ACTGAACGTCTTGTCC-1_contig_1	TRUE	693	TRB	TRBV12-3*01	TRBD1*01	TRBJ1-5*01	TRBC1*01	TRUE	TRUE	CASTTDGGYSNQPQHF	TGTGCCAGCACCACGGATGGGGGTTATAGCAATCAGCCCCAGCATTTT	9314	4	clonotype258	clonotype258_consensus_2	single TCR
ACTGAACGTCTTGTCC-1	TRUE	ACTGAACGTCTTGTCC-1_contig_3	TRUE	548	TRA	TRAV14/DV4*02	None	TRAJ20*01	TRAC*01	TRUE	TRUE	CAMREVSGDGPNDYKLSF	TGTGCAATGAGAGAGGTCAGCGGGGATGGCCCCAACGACTACAAGCTCAGCTTT	3704	1	clonotype258	clonotype258_consensus_1	single TCR
ACTGAACGTTAGATGA-1	TRUE	ACTGAACGTTAGATGA-1_contig_1	TRUE	700	TRB	TRBV11-2*01	TRBD2*01	TRBJ2-3*01	TRBC2*01	TRUE	TRUE	CASSRAGVAYPQRDTQYF	TGTGCCAGCAGCCGAGCGGGGGTAGCCTACCCTCAGCGGGATACGCAGTATTTT	16289	5	clonotype259	clonotype259_consensus_1	single TCR
ACTGAACGTTAGATGA-1	TRUE	ACTGAACGTTAGATGA-1_contig_2	TRUE	508	TRA	TRAV4*01	None	TRAJ9*01	TRAC*01	TRUE	TRUE	CLVAPNTGGFKTIF	TGCCTCGTGGCCCCTAATACTGGAGGCTTCAAAACTATCTTT	3384	1	clonotype259	clonotype259_consensus_2	single TCR
ACTGAACTCCAAAGTC-1	TRUE	ACTGAACTCCAAAGTC-1_contig_1	TRUE	688	TRA	TRAV3*01	None	TRAJ22*01	TRAC*01	TRUE	TRUE	CAVRDVSGSARQLTF	TGTGCTGTGAGAGATGTTTCTGGTTCTGCAAGGCAACTGACCTTT	7036	2	clonotype260	clonotype260_consensus_1	single TCR
ACTGAACTCCAAAGTC-1	TRUE	ACTGAACTCCAAAGTC-1_contig_2	TRUE	653	TRB	TRBV2*01	TRBD2*02	TRBJ2-7*01	TRBC1*01	TRUE	TRUE	CASRTSGTYEQYF	TGTGCCAGCCGGACTAGCGGGACCTACGAGCAGTACTTC	3317	1	clonotype260	clonotype260_consensus_2	single TCR
ACTGAACTCTTCCTTC-1	TRUE	ACTGAACTCTTCCTTC-1_contig_1	TRUE	562	TRA	TRAV29/DV5*01	None	TRAJ43*01	TRAC*01	TRUE	TRUE	CAASSNDMRF	TGTGCAGCAAGCAGCAATGACATGCGCTTT	3934	1	clonotype261	clonotype261_consensus_1	single TCR
ACTGAACTCTTCCTTC-1	TRUE	ACTGAACTCTTCCTTC-1_contig_2	TRUE	706	TRB	TRBV6-6*01	TRBD1*01	TRBJ1-5*01	TRBC1*01	TRUE	TRUE	CASQGAFNQPQHF	TGTGCCAGCCAGGGGGCCTTCAATCAGCCCCAGCATTTT	9607	3	clonotype261	clonotype261_consensus_2	single TCR
ACTGAGTAGAAACCTA-1	TRUE	ACTGAGTAGAAACCTA-1_contig_1	TRUE	664	TRB	TRBV4-1*01	TRBD1*01	TRBJ1-1*01	TRBC1*01	TRUE	TRUE	CASSARQGSNTEAFF	TGCGCCAGCAGCGCCCGACAGGGATCAAACACTGAAGCTTTCTTT	14705	5	clonotype262	clonotype262_consensus_1	single TCR
ACTGAGTAGAAACCTA-1	TRUE	ACTGAGTAGAAACCTA-1_contig_4	TRUE	736	TRA	TRAV8-1*01	None	TRAJ43*01	TRAC*01	TRUE	TRUE	CAVSPSILYNNDMRF	TGTGCCGTGAGTCCGTCTATCCTCTATAACAATGACATGCGCTTT	4085	1	clonotype262	clonotype262_consensus_2	single TCR
ACTGAGTAGCAACGGT-1	TRUE	ACTGAGTAGCAACGGT-1_contig_1	TRUE	610	TRA	TRAV27*01	None	TRAJ39*01	TRAC*01	TRUE	TRUE	CAGDSNNAGNMLTF	TGTGCAGGGGATTCTAATAATGCAGGCAACATGCTCACCTTT	6411	2	clonotype263	clonotype263_consensus_2	single TCR
ACTGAGTAGCAACGGT-1	TRUE	ACTGAGTAGCAACGGT-1_contig_3	TRUE	668	TRB	TRBV2*01	TRBD1*01	TRBJ2-1*01	TRBC2*01	TRUE	TRUE	CASSDRVEQFF	TGTGCCAGCAGCGACAGGGTAGAGCAGTTCTTC	8915	3	clonotype263	clonotype263_consensus_1	single TCR
ACTGAGTCATGCAATC-1	TRUE	ACTGAGTCATGCAATC-1_contig_1	TRUE	700	TRB	TRBV20-1*02	TRBD1*01	TRBJ2-3*01	TRBC2*01	TRUE	TRUE	CSARGTPDTQYF	TGCAGTGCGAGAGGGACGCCAGATACGCAGTATTTT	12814	5	clonotype265	clonotype265_consensus_2	single TCR
ACTGAGTCATGCAATC-1	TRUE	ACTGAGTCATGCAATC-1_contig_4	TRUE	636	TRA	TRAV13-2*01	None	TRAJ13*02	TRAC*01	TRUE	TRUE	CAELVSGGYQKVTF	TGTGCAGAGCTGGTTTCTGGGGGTTACCAGAAAGTTACCTTT	3634	1	clonotype265	clonotype265_consensus_1	single TCR
ACTGAGTGTCAAGCGA-1	TRUE	ACTGAGTGTCAAGCGA-1_contig_1	TRUE	691	TRB	TRBV11-2*03	None	TRBJ2-1*01	TRBC2*01	TRUE	TRUE	CASSFVSFHEQFF	TGTGCCAGCAGCTTCGTTAGTTTCCATGAGCAGTTCTTC	30278	9	clonotype266	clonotype266_consensus_2	single TCR
ACTGAGTGTCAAGCGA-1	TRUE	ACTGAGTGTCAAGCGA-1_contig_2	TRUE	463	TRA	TRAV22*01	None	TRAJ36*01	TRAC*01	TRUE	TRUE	CAVELTGANNLFF	TGTGCTGTGGAGCTGACTGGGGCAAACAACCTCTTCTTT	477	1	clonotype266	clonotype266_consensus_1	single TCR
ACTGAGTTCGACCAGC-1	TRUE	ACTGAGTTCGACCAGC-1_contig_1	TRUE	747	TRB	TRBV6-6*02	TRBD2*01	TRBJ1-1*01	TRBC1*01	TRUE	TRUE	CASSKGLPYEAFF	TGTGCCAGCAGCAAGGGACTTCCCTATGAAGCTTTCTTT	14012	5	clonotype267	clonotype267_consensus_2	single TCR
ACTGAGTTCGACCAGC-1	TRUE	ACTGAGTTCGACCAGC-1_contig_2	TRUE	540	TRA	TRAV23/DV6*01	None	TRAJ28*01	TRAC*01	TRUE	TRUE	CAALAGGAGSYQLTF	TGTGCAGCACTCGCCGGGGGGGCTGGGAGTTACCAACTCACTTTC	11199	3	clonotype267	clonotype267_consensus_1	single TCR
ACTGATGAGATGTGTA-1	TRUE	ACTGATGAGATGTGTA-1_contig_1	TRUE	513	TRB	TRBV6-5*01	None	TRBJ1-2*01	TRBC1*01	TRUE	TRUE	CASSYDGNYGYTF	TGTGCCAGCAGTTACGACGGAAACTATGGCTACACCTTC	5597	2	clonotype269	clonotype269_consensus_1	single TCR
ACTGATGAGATGTGTA-1	TRUE	ACTGATGAGATGTGTA-1_contig_2	TRUE	479	TRA	TRAV36/DV7*01	None	TRAJ53*01	TRAC*01	TRUE	TRUE	CAVEAPSGGSNYKLTF	TGTGCTGTGGAGGCCCCTAGTGGAGGTAGCAACTATAAACTGACATTT	3293	1	clonotype269	clonotype269_consensus_2	single TCR
ACTGATGTCTTGTTTG-1	TRUE	ACTGATGTCTTGTTTG-1_contig_1	TRUE	701	TRA	TRAV26-1*01	None	TRAJ50*01	TRAC*01	TRUE	TRUE	CIVRVEGETSYDKVIF	TGCATCGTCAGAGTCGAAGGAGAAACCTCCTACGACAAGGTGATATTT	2275	1	clonotype272	clonotype272_consensus_1	single TCR
ACTGATGTCTTGTTTG-1	TRUE	ACTGATGTCTTGTTTG-1_contig_2	TRUE	838	TRB	TRBV5-6*01	TRBD1*01	TRBJ1-5*01	TRBC1*01	TRUE	TRUE	CASSLFNRGHNQPQHF	TGTGCCAGCAGCTTATTTAACAGGGGGCACAATCAGCCCCAGCATTTT	8331	3	clonotype272	clonotype272_consensus_2	single TCR
ACTGCTCCACATCTTT-1	TRUE	ACTGCTCCACATCTTT-1_contig_1	TRUE	673	TRB	TRBV7-9*03	TRBD1*01	TRBJ2-7*01	TRBC1*01	TRUE	TRUE	CASSLDSSYEQYF	TGTGCCAGCAGCTTGGACAGCTCCTACGAGCAGTACTTC	13543	5	clonotype273	clonotype273_consensus_1	single TCR
ACTGCTCCACATCTTT-1	TRUE	ACTGCTCCACATCTTT-1_contig_2	TRUE	504	TRA	TRAV21*01	None	TRAJ53*01	TRAC*01	TRUE	TRUE	CALNSGGSNYKLTF	TGTGCGCTTAATAGTGGAGGTAGCAACTATAAACTGACATTT	7255	3	clonotype273	clonotype273_consensus_2	single TCR
ACTGCTCCAGGTTTCA-1	TRUE	ACTGCTCCAGGTTTCA-1_contig_1	TRUE	495	TRA	TRAV10*01	None	TRAJ7*01	TRAC*01	TRUE	TRUE	CVVSQYYGNNRLAF	TGTGTGGTGAGCCAGTACTATGGGAACAACAGACTCGCTTTT	4750	1	clonotype274	clonotype274_consensus_2	single TCR
ACTGCTCCAGGTTTCA-1	TRUE	ACTGCTCCAGGTTTCA-1_contig_3	TRUE	506	TRB	TRBV27*01	TRBD2*02	TRBJ2-3*01	TRBC2*01	TRUE	TRUE	CASLAGHTDTQYF	TGTGCCAGTCTAGCGGGACACACAGATACGCAGTATTTT	3453	1	clonotype274	clonotype274_consensus_1	single TCR
ACTGTCCAGAGACTTA-1	TRUE	ACTGTCCAGAGACTTA-1_contig_1	TRUE	531	TRB	TRBV5-1*01	TRBD1*01	TRBJ1-1*01	TRBC1*01	TRUE	TRUE	CASSPQVRGVNTEAFF	TGCGCCAGCAGCCCGCAGGTGAGGGGAGTGAACACTGAAGCTTTCTTT	6549	2	clonotype276	clonotype276_consensus_2	single TCR
ACTGTCCAGAGACTTA-1	TRUE	ACTGTCCAGAGACTTA-1_contig_2	TRUE	560	TRA	TRAV13-2*01	None	TRAJ52*01	TRAC*01	TRUE	TRUE	CAEIRGGTSYGKLTF	TGTGCAGAGATCCGTGGGGGTACTAGCTATGGAAAGCTGACATTT	3966	1	clonotype276	clonotype276_consensus_1	single TCR
ACTGTCCCAATGTTGC-1	TRUE	ACTGTCCCAATGTTGC-1_contig_1	TRUE	706	TRB	TRBV3-1*01	TRBD2*02	TRBJ1-3*01	TRBC1*01	TRUE	TRUE	CASSRLGGATRNTIYF	TGTGCCAGCAGCCGCTTGGGAGGGGCGACTAGAAACACCATATATTTT	9348	4	clonotype277	clonotype277_consensus_1	single TCR
ACTGTCCCAATGTTGC-1	TRUE	ACTGTCCCAATGTTGC-1_contig_3	TRUE	478	TRA	TRAV38-2/DV8*01	None	TRAJ53*01	TRAC*01	TRUE	TRUE	CAYLGSNYKLTF	TGTGCTTATCTAGGTAGCAACTATAAACTGACATTT	3083	1	clonotype277	clonotype277_consensus_2	single TCR
ACTGTCCCACCCATTC-1	TRUE	ACTGTCCCACCCATTC-1_contig_1	TRUE	667	TRB	TRBV4-1*01	TRBD1*01	TRBJ1-3*01	TRBC1*01	TRUE	TRUE	CASSQEGRAGRNTIYF	TGCGCCAGCAGCCAAGAAGGAAGGGCAGGGAGAAACACCATATATTTT	15550	5	clonotype278	clonotype278_consensus_1	single TCR
ACTGTCCCACCCATTC-1	TRUE	ACTGTCCCACCCATTC-1_contig_6	TRUE	483	TRA	TRAV4*01	None	TRAJ10*01	TRAC*01	TRUE	TRUE	CLVGDIVPTGGGNKLTF	TGCCTCGTGGGTGACATAGTTCCCACGGGAGGAGGAAACAAACTCACCTTT	3654	1	clonotype278	clonotype278_consensus_2	single TCR
ACTGTCCGTTCTGTTT-1	TRUE	ACTGTCCGTTCTGTTT-1_contig_2	TRUE	629	TRA	TRAV8-4*01	None	TRAJ45*01	TRAC*01	TRUE	TRUE	CAVLPPSGGGADGLTF	TGTGCTGTTCTACCCCCTTCAGGAGGAGGTGCTGACGGACTCACCTTT	3399	1	clonotype279	clonotype279_consensus_2	single TCR
ACTGTCCGTTCTGTTT-1	TRUE	ACTGTCCGTTCTGTTT-1_contig_3	TRUE	706	TRB	TRBV20-1*02	TRBD1*01	TRBJ1-2*01	TRBC1*01	TRUE	TRUE	CSAREPNYGYTF	TGCAGTGCTAGAGAGCCTAACTATGGCTACACCTTC	15630	5	clonotype279	clonotype279_consensus_1	single TCR
ACTTACTCAAGTACCT-1	TRUE	ACTTACTCAAGTACCT-1_contig_1	TRUE	691	TRB	TRBV12-4*01	TRBD1*01	TRBJ1-5*01	TRBC1*01	TRUE	TRUE	CASTEGDRGPNQPQHF	TGTGCCAGCACCGAGGGGGACAGGGGGCCCAATCAGCCCCAGCATTTT	12210	5	clonotype282	clonotype282_consensus_1	single TCR
ACTTACTCAAGTACCT-1	TRUE	ACTTACTCAAGTACCT-1_contig_3	TRUE	487	TRA	TRAV10*01	None	TRAJ42*01	TRAC*01	TRUE	TRUE	CVVSAYGGSQGNLIF	TGTGTGGTGAGCGCGTATGGAGGAAGCCAAGGAAATCTCATCTTT	2301	1	clonotype282	clonotype282_consensus_2	single TCR
ACTTACTGTAGCTAAA-1	TRUE	ACTTACTGTAGCTAAA-1_contig_1	TRUE	488	TRA	TRAV12-1*01	None	TRAJ36*01	TRAC*01	TRUE	TRUE	CVVNRPGANNLFF	TGTGTGGTGAACAGGCCCGGGGCAAACAACCTCTTCTTT	3791	1	clonotype285	clonotype285_consensus_1	single TCR
ACTTACTGTAGCTAAA-1	TRUE	ACTTACTGTAGCTAAA-1_contig_3	TRUE	552	TRB	TRBV6-2*01	None	TRBJ1-2*01	TRBC1*01	TRUE	TRUE	CASSYAAKYGYTF	TGTGCCAGCAGTTACGCAGCTAAATATGGCTACACCTTC	1429	1	clonotype285	clonotype285_consensus_2	single TCR
ACTTACTTCAGCAACT-1	TRUE	ACTTACTTCAGCAACT-1_contig_1	TRUE	691	TRB	TRBV5-1*01	TRBD2*01	TRBJ2-3*01	TRBC2*01	TRUE	TRUE	CASSLGLAFTDTQYF	TGCGCCAGCAGCCTGGGACTAGCCTTCACAGATACGCAGTATTTT	10662	4	clonotype288	clonotype288_consensus_1	single TCR
ACTTACTTCAGCAACT-1	TRUE	ACTTACTTCAGCAACT-1_contig_2	TRUE	450	TRA	TRAV21*01	None	TRAJ31*01	TRAC*01	TRUE	TRUE	CAVNKNNARLMF	TGTGCTGTGAATAAGAACAATGCCAGACTCATGTTT	4228	1	clonotype288	clonotype288_consensus_2	single TCR
ACTTGTTCATGTCCTC-1	TRUE	ACTTGTTCATGTCCTC-1_contig_1	TRUE	678	TRB	TRBV7-9*03	None	TRBJ1-1*01	TRBC1*01	TRUE	TRUE	CASSPRTDTEAFF	TGTGCCAGCAGCCCCCGAACAGATACTGAAGCTTTCTTT	10958	3	clonotype290	clonotype290_consensus_1	single TCR
ACTTGTTCATGTCCTC-1	TRUE	ACTTGTTCATGTCCTC-1_contig_4	TRUE	494	TRA	TRAV13-1*01	None	TRAJ36*01	TRAC*01	TRUE	TRUE	CAASIRTGANNLFF	TGTGCAGCAAGTATAAGAACTGGGGCAAACAACCTCTTCTTT	3503	1	clonotype290	clonotype290_consensus_2	single TCR
ACTTTCACAGACAAGC-1	TRUE	ACTTTCACAGACAAGC-1_contig_1	TRUE	465	TRA	TRAV38-1*01	None	TRAJ49*01	TRAC*01	TRUE	TRUE	CAFVDTGNQFYF	TGTGCTTTCGTGGACACCGGTAACCAGTTCTATTTT	4459	1	clonotype292	clonotype292_consensus_1	single TCR
ACTTTCACAGACAAGC-1	TRUE	ACTTTCACAGACAAGC-1_contig_2	TRUE	640	TRB	TRBV28*01	None	TRBJ2-7*01	TRBC2*01	TRUE	TRUE	CASSTDYEQYF	TGTGCCAGCAGTACTGACTACGAGCAGTACTTC	8398	5	clonotype292	clonotype292_consensus_2	single TCR
ACTTTCAGTCCAGTTA-1	TRUE	ACTTTCAGTCCAGTTA-1_contig_1	TRUE	446	TRA	TRAV9-2*01	None	TRAJ43*01	TRAC*01	TRUE	TRUE	CASYNNNDMRF	TGTGCTTCCTACAATAACAATGACATGCGCTTT	3811	1	clonotype293	clonotype293_consensus_1	single TCR
ACTTTCAGTCCAGTTA-1	TRUE	ACTTTCAGTCCAGTTA-1_contig_2	TRUE	779	TRB	TRBV4-2*01	TRBD1*01	TRBJ1-6*02	TRBC1*01	TRUE	TRUE	CASSQDIGRGLYNSPLHF	TGTGCCAGCAGCCAAGATATAGGCAGGGGGCTCTATAATTCACCCCTCCACTTT	10604	4	clonotype293	clonotype293_consensus_2	single TCR
ACTTTCAGTTCGTGAT-1	TRUE	ACTTTCAGTTCGTGAT-1_contig_1	TRUE	516	TRB	TRBV5-1*01	TRBD2*02	TRBJ1-3*01	TRBC1*01	TRUE	TRUE	CASSLREGISGNTIYF	TGCGCCAGCAGCTTGAGAGAGGGAATATCTGGAAACACCATATATTTT	1763	1	clonotype294	clonotype294_consensus_1	single TCR
ACTTTCAGTTCGTGAT-1	TRUE	ACTTTCAGTTCGTGAT-1_contig_2	TRUE	509	TRA	TRAV6*01	None	TRAJ16*01	TRAC*01	TRUE	TRUE	CALGSSDGQKLLF	TGTGCTCTAGGATCTTCAGATGGCCAGAAGCTGCTCTTT	4301	1	clonotype294	clonotype294_consensus_2	single TCR
AGAATAGAGTGGAGTC-1	TRUE	AGAATAGAGTGGAGTC-1_contig_1	TRUE	545	TRA	TRAV12-1*01	None	TRAJ32*02	TRAC*01	TRUE	TRUE	CVVKGVGGATNKLIF	TGTGTGGTGAAGGGAGTAGGTGGTGCTACAAACAAGCTCATCTTT	3896	1	clonotype297	clonotype297_consensus_2	single TCR
AGAATAGAGTGGAGTC-1	TRUE	AGAATAGAGTGGAGTC-1_contig_2	TRUE	749	TRB	TRBV18*01	None	TRBJ2-7*01	TRBC2*01	TRUE	TRUE	CASSPAYEQYF	TGTGCCAGCTCACCGGCCTACGAGCAGTACTTC	6176	2	clonotype297	clonotype297_consensus_1	single TCR
AGAATAGGTCCAGTGC-1	TRUE	AGAATAGGTCCAGTGC-1_contig_1	TRUE	499	TRA	TRAV21*01	None	TRAJ56*01	TRAC*01	TRUE	TRUE	CAAYTGANSKLTF	TGTGCTGCCTACACTGGAGCCAATAGTAAGCTGACATTT	6670	2	clonotype299	clonotype299_consensus_1	single TCR
AGAATAGGTCCAGTGC-1	TRUE	AGAATAGGTCCAGTGC-1_contig_3	TRUE	652	TRB	TRBV15*01	TRBD2*01	TRBJ2-7*01	TRBC2*01	TRUE	TRUE	CATGRLISYEQYF	TGTGCCACTGGGAGACTAATCTCCTACGAGCAGTACTTC	2959	1	clonotype299	clonotype299_consensus_2	single TCR
AGAATAGGTGCAGTAG-1	TRUE	AGAATAGGTGCAGTAG-1_contig_1	TRUE	670	TRB	TRBV5-1*01	TRBD1*01	TRBJ1-5*01	TRBC1*01	TRUE	TRUE	CASSLGLGQAPQPQHF	TGCGCCAGCAGCTTGGGACTGGGACAGGCCCCACAGCCCCAGCATTTT	11956	4	clonotype300	clonotype300_consensus_1	single TCR
AGAATAGGTGCAGTAG-1	TRUE	AGAATAGGTGCAGTAG-1_contig_4	TRUE	559	TRA	TRAV12-3*01	None	TRAJ30*01	TRAC*01	TRUE	TRUE	CAMSIDDKIIF	TGTGCAATGAGCATAGATGACAAGATCATCTTT	3762	1	clonotype300	clonotype300_consensus_2	single TCR
AGACGTTCAGCGAACA-1	TRUE	AGACGTTCAGCGAACA-1_contig_1	TRUE	643	TRB	TRBV12-3*01	None	TRBJ2-7*01	TRBC2*01	TRUE	TRUE	CASSLGAVYEQYF	TGTGCCAGCAGTTTAGGGGCGGTCTACGAGCAGTACTTC	8300	3	clonotype302	clonotype302_consensus_2	single TCR
AGACGTTCAGCGAACA-1	TRUE	AGACGTTCAGCGAACA-1_contig_2	TRUE	512	TRA	TRAV24*01	None	TRAJ54*01	TRAC*01	TRUE	TRUE	CAFGGAQKLVF	TGTGCCTTTGGGGGAGCCCAGAAGCTGGTATTT	4147	1	clonotype302	clonotype302_consensus_1	single TCR
AGACGTTCAGTATCTG-1	TRUE	AGACGTTCAGTATCTG-1_contig_1	TRUE	614	TRB	TRBV7-2*01	TRBD1*01	TRBJ1-3*01	TRBC1*01	TRUE	TRUE	CASSLVGGPGNTIYF	TGTGCCAGCAGCTTAGTAGGGGGGCCTGGAAACACCATATATTTT	3817	1	clonotype303	clonotype303_consensus_2	single TCR
AGACGTTCAGTATCTG-1	TRUE	AGACGTTCAGTATCTG-1_contig_3	TRUE	523	TRA	TRAV13-1*01	None	TRAJ27*01	TRAC*01	TRUE	TRUE	CAANTNAGKSTF	TGTGCAGCAAACACCAATGCAGGCAAATCAACCTTT	4003	1	clonotype303	clonotype303_consensus_1	single TCR
AGAGCGAAGATGCCAG-1	TRUE	AGAGCGAAGATGCCAG-1_contig_1	TRUE	588	TRA	TRAV38-2/DV8*01	None	TRAJ53*01	TRAC*01	TRUE	TRUE	CAFDGSNYKLTF	TGTGCTTTTGATGGTAGCAACTATAAACTGACATTT	17578	5	clonotype305	clonotype305_consensus_1	single TCR
AGAGCGAAGATGCCAG-1	TRUE	AGAGCGAAGATGCCAG-1_contig_2	TRUE	518	TRB	TRBV9*02	None	TRBJ2-6*01	TRBC2*01	TRUE	TRUE	CASSVYNSGANVLTF	TGTGCCAGCAGCGTTTACAACTCTGGGGCCAACGTCCTGACTTTC	8110	2	clonotype305	clonotype305_consensus_2	single TCR
AGAGCGACACAGGCCT-1	TRUE	AGAGCGACACAGGCCT-1_contig_1	TRUE	468	TRA	TRAV38-1*01	None	TRAJ48*01	TRAC*01	TRUE	TRUE	CASPFREKLTF	TGTGCTTCCCCTTTCCGTGAGAAATTAACCTTT	2341	1	clonotype306	clonotype306_consensus_2	single TCR
AGAGCGACACAGGCCT-1	TRUE	AGAGCGACACAGGCCT-1_contig_2	TRUE	497	TRB	TRBV20-1*02	None	TRBJ2-7*01	TRBC2*01	TRUE	TRUE	CSARYQLYEQYF	TGCAGTGCTAGATACCAACTCTACGAGCAGTACTTC	6916	2	clonotype306	clonotype306_consensus_1	single TCR
AGAGCGATCTGTCAAG-1	TRUE	AGAGCGATCTGTCAAG-1_contig_1	TRUE	691	TRB	TRBV7-9*01	TRBD1*01	TRBJ1-1*01	TRBC1*01	TRUE	TRUE	CASSGQMNTEAFF	TGTGCCAGCAGCGGACAAATGAACACTGAAGCTTTCTTT	23207	6	clonotype308	clonotype308_consensus_1	single TCR
AGAGCGATCTGTCAAG-1	TRUE	AGAGCGATCTGTCAAG-1_contig_2	TRUE	673	TRA	TRAV8-3*01	None	TRAJ36*01	TRAC*01	TRUE	TRUE	CAVGANNLFF	TGTGCTGTTGGGGCAAACAACCTCTTCTTT	2995	1	clonotype308	clonotype308_consensus_2	single TCR
AGAGCTTAGACGCTTT-1	TRUE	AGAGCTTAGACGCTTT-1_contig_1	TRUE	789	TRB	TRBV30*01	None	TRBJ2-6*01	TRBC2*01	TRUE	TRUE	CASLGGGNVLTF	TGTGCCTCCCTGGGAGGGGGAAACGTCCTGACTTTC	13328	4	clonotype309	clonotype309_consensus_1	single TCR
AGAGCTTAGACGCTTT-1	TRUE	AGAGCTTAGACGCTTT-1_contig_3	TRUE	546	TRA	TRAV12-3*01	None	TRAJ43*01	TRAC*01	TRUE	TRUE	CAKYNNNDMRF	TGTGCAAAGTACAATAACAATGACATGCGCTTT	289	1	clonotype309	clonotype309_consensus_2	single TCR
AGAGCTTAGATCCTGT-1	TRUE	AGAGCTTAGATCCTGT-1_contig_1	TRUE	612	TRB	TRBV6-6*01	None	TRBJ2-7*01	TRBC2*01	TRUE	TRUE	CASSTAPRDYYEQYF	TGTGCCAGCAGTACGGCCCCAAGGGACTACTACGAGCAGTACTTC	13506	5	clonotype311	clonotype311_consensus_2	single TCR
AGAGCTTAGATCCTGT-1	TRUE	AGAGCTTAGATCCTGT-1_contig_2	TRUE	612	TRA	TRAV41*01	None	TRAJ30*01	TRAC*01	TRUE	TRUE	CAVANRDDKIIF	TGTGCTGTCGCGAACAGAGATGACAAGATCATCTTT	5688	2	clonotype311	clonotype311_consensus_1	single TCR
AGAGCTTCATGTCCTC-1	TRUE	AGAGCTTCATGTCCTC-1_contig_1	TRUE	665	TRB	TRBV6-2*01	TRBD2*01	TRBJ1-1*01	TRBC1*01	TRUE	TRUE	CASSSRGSTEAFF	TGTGCCAGCAGCTCCCGGGGGAGCACTGAAGCTTTCTTT	19484	7	clonotype312	clonotype312_consensus_1	single TCR
AGAGCTTCATGTCCTC-1	TRUE	AGAGCTTCATGTCCTC-1_contig_4	TRUE	633	TRA	TRAV12-1*01	None	TRAJ27*01	TRAC*01	TRUE	TRUE	CVVILSTNAGKSTF	TGTGTGGTGATCCTTTCCACCAATGCAGGCAAATCAACCTTT	5124	2	clonotype312	clonotype312_consensus_2	single TCR
AGAGCTTGTACATGTC-1	TRUE	AGAGCTTGTACATGTC-1_contig_1	TRUE	673	TRB	TRBV5-1*01	TRBD2*01	TRBJ2-5*01	TRBC2*01	TRUE	TRUE	CASSFERGSLETQYF	TGCGCCAGCAGCTTTGAGCGGGGGAGTTTAGAGACCCAGTACTTC	14462	6	clonotype313	clonotype313_consensus_2	single TCR
AGAGCTTGTACATGTC-1	TRUE	AGAGCTTGTACATGTC-1_contig_2	TRUE	613	TRA	TRAV13-1*01	None	TRAJ22*01	TRAC*01	TRUE	TRUE	CAAKASGSARQLTF	TGTGCAGCAAAAGCTAGTGGTTCTGCAAGGCAACTGACCTTT	2468	1	clonotype313	clonotype313_consensus_1	single TCR
AGAGCTTTCCGTAGTA-1	TRUE	AGAGCTTTCCGTAGTA-1_contig_1	TRUE	675	TRB	TRBV4-1*01	TRBD2*01	TRBJ2-2*01	TRBC1*01	TRUE	TRUE	CASSRGAEPFLSTGELFF	TGCGCCAGCAGCCGCGGAGCGGAACCCTTCCTGAGCACCGGGGAGCTGTTTTTT	8933	3	clonotype314	clonotype314_consensus_2	single TCR
AGAGCTTTCCGTAGTA-1	TRUE	AGAGCTTTCCGTAGTA-1_contig_2	TRUE	448	TRA	TRAV21*01	None	TRAJ39*01	TRAC*01	TRUE	TRUE	CAGFNAGNMLTF	TGTGCTGGGTTTAATGCAGGCAACATGCTCACCTTT	4572	1	clonotype314	clonotype314_consensus_1	single TCR
AGAGCTTTCTGCTGCT-1	TRUE	AGAGCTTTCTGCTGCT-1_contig_1	TRUE	688	TRB	TRBV5-1*01	TRBD2*02	TRBJ2-7*01	TRBC2*01	TRUE	TRUE	CASSLEAGTYEQYF	TGCGCCAGCAGCTTGGAGGCGGGAACCTACGAGCAGTACTTC	22441	8	clonotype315	clonotype315_consensus_1	single TCR
AGAGCTTTCTGCTGCT-1	TRUE	AGAGCTTTCTGCTGCT-1_contig_2	TRUE	456	TRA	TRAV9-2*01	None	TRAJ29*01	TRAC*01	TRUE	TRUE	CALSDRPGNTPLVF	TGTGCTCTGAGTGATCGACCAGGAAACACACCTCTTGTCTTT	4858	1	clonotype315	clonotype315_consensus_2	single TCR
AGATCTGCATCTACGA-1	TRUE	AGATCTGCATCTACGA-1_contig_1	TRUE	701	TRB	TRBV20-1*02	None	TRBJ1-1*01	TRBC1*01	TRUE	TRUE	CSARSLKNTEAFF	TGCAGTGCTAGAAGCTTGAAAAACACTGAAGCTTTCTTT	13709	4	clonotype320	clonotype320_consensus_2	single TCR
AGATCTGCATCTACGA-1	TRUE	AGATCTGCATCTACGA-1_contig_3	TRUE	551	TRA	TRAV12-2*01	None	TRAJ12*01	TRAC*01	TRUE	TRUE	CAVNIEDSSYKLIF	TGTGCCGTGAACATCGAGGATAGCAGCTATAAATTGATCTTC	3564	1	clonotype320	clonotype320_consensus_1	single TCR
AGATCTGTCGCACTCT-1	TRUE	AGATCTGTCGCACTCT-1_contig_1	TRUE	870	TRA	TRAV8-3*01	None	TRAJ20*01	TRAC*01	TRUE	TRUE	CAVGASNDYKLSF	TGTGCTGTGGGGGCCTCTAACGACTACAAGCTCAGCTTT	7675	3	clonotype322	clonotype322_consensus_1	single TCR
AGATCTGTCGCACTCT-1	TRUE	AGATCTGTCGCACTCT-1_contig_3	TRUE	699	TRB	TRBV6-1*01	TRBD2*01	TRBJ2-7*01	TRBC2*01	TRUE	TRUE	CASSVPGLGEYEQYF	TGTGCCAGCAGTGTCCCGGGACTAGGCGAGTACGAGCAGTACTTC	10286	3	clonotype322	clonotype322_consensus_2	single TCR
AGATTGCGTGTGAAAT-1	TRUE	AGATTGCGTGTGAAAT-1_contig_1	TRUE	686	TRB	TRBV2*01	TRBD1*01	TRBJ1-5*01	TRBC1*01	TRUE	TRUE	CASSSQGSNQPQHF	TGTGCCAGCAGTTCACAGGGTAGCAATCAGCCCCAGCATTTT	5033	3	clonotype323	clonotype323_consensus_1	single TCR
AGATTGCGTGTGAAAT-1	TRUE	AGATTGCGTGTGAAAT-1_contig_3	TRUE	510	TRA	TRAV30*01	None	TRAJ26*01	TRAC*01	TRUE	TRUE	CGTNVYGQNFVF	TGTGGCACAAACGTCTATGGTCAGAATTTTGTCTTT	4317	1	clonotype323	clonotype323_consensus_2	single TCR
AGCAGCCAGAGATGAG-1	TRUE	AGCAGCCAGAGATGAG-1_contig_1	TRUE	688	TRB	TRBV12-3*01	TRBD1*01	TRBJ2-3*01	TRBC2*01	TRUE	TRUE	CASSWDIVSTDTQYF	TGTGCCAGCAGTTGGGACATCGTTAGCACAGATACGCAGTATTTT	13116	5	clonotype326	clonotype326_consensus_2	single TCR
AGCAGCCAGAGATGAG-1	TRUE	AGCAGCCAGAGATGAG-1_contig_3	TRUE	478	TRA	TRAV20*01	None	TRAJ36*01	TRAC*01	TRUE	TRUE	CAVQEPGANNLFF	TGTGCTGTGCAGGAGCCCGGGGCAAACAACCTCTTCTTT	4258	1	clonotype326	clonotype326_consensus_1	single TCR
AGCAGCCCAATGTTGC-1	TRUE	AGCAGCCCAATGTTGC-1_contig_1	TRUE	668	TRB	TRBV20-1*02	TRBD1*01	TRBJ1-1*01	TRBC1*01	TRUE	TRUE	CSARDRGLLNTEAFF	TGCAGTGCTAGGGACAGGGGACTTTTGAACACTGAAGCTTTCTTT	3498	1	clonotype327	clonotype327_consensus_1	single TCR
AGCAGCCCAATGTTGC-1	TRUE	AGCAGCCCAATGTTGC-1_contig_3	TRUE	504	TRA	TRAV13-1*01	None	TRAJ31*01	TRAC*01	TRUE	TRUE	CAAPYSNNARLMF	TGTGCAGCCCCGTATTCTAACAATGCCAGACTCATGTTT	4432	1	clonotype327	clonotype327_consensus_2	single TCR
AGCAGCCGTGAGTGAC-1	TRUE	AGCAGCCGTGAGTGAC-1_contig_1	TRUE	690	TRB	TRBV3-1*01	None	TRBJ2-1*01	TRBC2*01	TRUE	TRUE	CASSQEPSNEQFF	TGTGCCAGCAGCCAAGAACCTTCCAATGAGCAGTTCTTC	10117	5	clonotype8	clonotype8_consensus_2	single TCR
AGCAGCCGTGAGTGAC-1	TRUE	AGCAGCCGTGAGTGAC-1_contig_2	TRUE	664	TRA	TRAV26-1*01	None	TRAJ32*02	TRAC*01	TRUE	TRUE	CIVRVRSGATNKLIF	TGCATCGTCAGAGTCCGGAGTGGTGCTACAAACAAGCTCATCTTT	5566	2	clonotype8	clonotype8_consensus_1	single TCR
AGCATACAGATGCCAG-1	TRUE	AGCATACAGATGCCAG-1_contig_1	TRUE	689	TRB	TRBV5-1*01	TRBD2*01	TRBJ2-7*01	TRBC2*01	TRUE	TRUE	CASSLAGPYEQYF	TGCGCCAGCAGCTTAGCGGGGCCCTACGAGCAGTACTTC	8793	3	clonotype331	clonotype331_consensus_1	single TCR
AGCATACAGATGCCAG-1	TRUE	AGCATACAGATGCCAG-1_contig_2	TRUE	557	TRA	TRAV12-1*01	None	TRAJ27*01	TRAC*01	TRUE	TRUE	CVVSGGTNAGKSTF	TGTGTGGTGTCCGGTGGAACCAATGCAGGCAAATCAACCTTT	3506	1	clonotype331	clonotype331_consensus_2	single TCR
AGCCTAAAGTGTTTGC-1	TRUE	AGCCTAAAGTGTTTGC-1_contig_1	TRUE	520	TRB	TRBV4-1*01	None	TRBJ2-2*01	TRBC2*01	TRUE	TRUE	CASSHQRSGELFF	TGCGCCAGCAGCCACCAGCGTAGCGGGGAGCTGTTTTTT	6030	2	clonotype333	clonotype333_consensus_1	single TCR
AGCCTAAAGTGTTTGC-1	TRUE	AGCCTAAAGTGTTTGC-1_contig_2	TRUE	478	TRA	TRAV4*01	None	TRAJ9*01	TRAC*01	TRUE	TRUE	CLVVNTGGFKTIF	TGCCTCGTGGTTAATACTGGAGGCTTCAAAACTATCTTT	4301	1	clonotype333	clonotype333_consensus_2	single TCR
AGCGTATGTGTCGCTG-1	TRUE	AGCGTATGTGTCGCTG-1_contig_1	TRUE	680	TRB	TRBV20-1*02	TRBD2*01	TRBJ1-5*01	TRBC1*01	TRUE	TRUE	CSALVGGLNNQPQHF	TGCAGTGCCCTGGTCGGGGGTCTAAACAATCAGCCCCAGCATTTT	2346	1	clonotype340	clonotype340_consensus_1	single TCR
AGCGTATGTGTCGCTG-1	TRUE	AGCGTATGTGTCGCTG-1_contig_3	TRUE	597	TRA	TRAV41*01	None	TRAJ32*02	TRAC*01	TRUE	TRUE	CAVVYGGATNKLIF	TGTGCTGTTGTTTATGGTGGTGCTACAAACAAGCTCATCTTT	3211	1	clonotype340	clonotype340_consensus_2	single TCR
AGCGTATTCATTGCCC-1	TRUE	AGCGTATTCATTGCCC-1_contig_1	TRUE	537	TRA	TRAV13-2*01	None	TRAJ28*01	TRAC*01	TRUE	TRUE	CAENIGAGSYQLTF	TGTGCAGAGAATATTGGGGCTGGGAGTTACCAACTCACTTTC	3603	1	clonotype341	clonotype341_consensus_2	single TCR
AGCGTATTCATTGCCC-1	TRUE	AGCGTATTCATTGCCC-1_contig_3	TRUE	682	TRB	TRBV11-2*03	TRBD1*01	TRBJ2-5*01	TRBC2*01	TRUE	TRUE	CASSFGSARGETQYF	TGTGCCAGCAGCTTCGGTTCTGCTAGGGGAGAGACCCAGTACTTC	5705	2	clonotype341	clonotype341_consensus_1	single TCR
AGCTCCTCATCCTTGC-1	TRUE	AGCTCCTCATCCTTGC-1_contig_2	TRUE	919	TRB	TRBV11-2*01	TRBD2*01	TRBJ2-7*01	TRBC1*01	TRUE	TRUE	CASSLTSLPPYSYEQYF	TGTGCCAGCAGCTTAACCAGCCTACCGCCCTACTCCTACGAGCAGTACTTC	7394	3	clonotype345	clonotype345_consensus_2	single TCR
AGCTCCTCATCCTTGC-1	TRUE	AGCTCCTCATCCTTGC-1_contig_3	TRUE	511	TRA	TRAV21*01	None	TRAJ28*01	TRAC*01	TRUE	TRUE	CAVRLKNSGAGSYQLTF	TGTGCTGTGAGGCTAAAGAACTCTGGGGCTGGGAGTTACCAACTCACTTTC	4133	1	clonotype345	clonotype345_consensus_1	single TCR
AGCTCCTGTGATGATA-1	TRUE	AGCTCCTGTGATGATA-1_contig_1	TRUE	812	TRB	TRBV19*01	TRBD2*01	TRBJ2-7*01	TRBC2*01	TRUE	TRUE	CASGGGLAKDEQYF	TGTGCCAGCGGCGGGGGACTAGCTAAGGACGAGCAGTACTTC	7742	3	clonotype348	clonotype348_consensus_2	single TCR
AGCTCCTGTGATGATA-1	TRUE	AGCTCCTGTGATGATA-1_contig_3	TRUE	479	TRA	TRAV38-1*01	None	TRAJ57*01	TRAC*01	TRUE	TRUE	CAFFTLQGGSEKLVF	TGTGCTTTCTTCACCCTTCAGGGCGGATCTGAAAAGCTGGTCTTT	4559	1	clonotype348	clonotype348_consensus_1	single TCR
AGCTCCTGTTAAAGAC-1	TRUE	AGCTCCTGTTAAAGAC-1_contig_1	TRUE	669	TRB	TRBV7-9*01	TRBD1*01	TRBJ1-4*01	TRBC1*01	TRUE	TRUE	CASSQQGSNEKLFF	TGTGCCAGCAGCCAACAGGGCTCGAATGAAAAACTGTTTTTT	7824	3	clonotype349	clonotype349_consensus_2	single TCR
AGCTCCTGTTAAAGAC-1	TRUE	AGCTCCTGTTAAAGAC-1_contig_3	TRUE	556	TRA	TRAV26-1*01	None	TRAJ6*01	TRAC*01	TRUE	TRUE	CIVRVAPSGGSYIPTF	TGCATCGTCAGAGTCGCCCCATCAGGAGGAAGCTACATACCTACATTT	6815	2	clonotype349	clonotype349_consensus_1	single TCR
AGCTCTCAGAGTACCG-1	TRUE	AGCTCTCAGAGTACCG-1_contig_1	TRUE	689	TRB	TRBV12-3*01	TRBD1*01	TRBJ2-5*01	TRBC2*01	TRUE	TRUE	CASSSHRGRETQYF	TGTGCCAGCAGTTCCCATCGGGGCAGAGAGACCCAGTACTTC	44039	14	clonotype350	clonotype350_consensus_2	single TCR
AGCTCTCAGAGTACCG-1	TRUE	AGCTCTCAGAGTACCG-1_contig_3	TRUE	279	TRA	TRAV12-1*01	None	TRAJ43*01	TRAC*01	TRUE	TRUE	CVVMNNDMRF	TGTGTGGTGATGAACAATGACATGCGCTTT	5264	1	clonotype350	clonotype350_consensus_1	single TCR
AGCTTGATCGTGTAGT-1	TRUE	AGCTTGATCGTGTAGT-1_contig_1	TRUE	576	TRA	TRAV29/DV5*01	None	TRAJ8*01	TRAC*01	TRUE	TRUE	CAAMNTGFQKLVF	TGTGCAGCCATGAACACAGGCTTTCAGAAACTTGTATTT	1283	1	clonotype357	clonotype357_consensus_2	single TCR
AGCTTGATCGTGTAGT-1	TRUE	AGCTTGATCGTGTAGT-1_contig_2	TRUE	626	TRB	TRBV12-4*01	TRBD2*01	TRBJ2-3*01	TRBC2*01	TRUE	TRUE	CASSLDSDTQYF	TGTGCCAGCAGTCTGGACTCAGATACGCAGTATTTT	4579	6	clonotype357	clonotype357_consensus_1	single TCR
AGGCCACAGCTGTTCA-1	TRUE	AGGCCACAGCTGTTCA-1_contig_1	TRUE	725	TRB	TRBV29-1*01	TRBD2*01	TRBJ2-5*01	TRBC2*01	TRUE	TRUE	CSVGLAGIETQYF	TGCAGCGTTGGACTAGCTGGGATAGAGACCCAGTACTTC	42077	15	clonotype359	clonotype359_consensus_1	single TCR
AGGCCACAGCTGTTCA-1	TRUE	AGGCCACAGCTGTTCA-1_contig_3	TRUE	600	TRA	TRAV19*01	None	TRAJ36*01	TRAC*01	TRUE	TRUE	CALSEARTGANNLFF	TGTGCTCTGAGTGAGGCACGGACTGGGGCAAACAACCTCTTCTTT	13978	6	clonotype359	clonotype359_consensus_2	single TCR
AGGCCACAGGTGGGTT-1	TRUE	AGGCCACAGGTGGGTT-1_contig_1	TRUE	721	TRA	TRAV3*01	None	TRAJ29*01	TRAC*01	TRUE	TRUE	CAVRVSGNTPLVF	TGTGCTGTGAGAGTTTCAGGAAACACACCTCTTGTCTTT	7926	3	clonotype360	clonotype360_consensus_1	single TCR
AGGCCACAGGTGGGTT-1	TRUE	AGGCCACAGGTGGGTT-1_contig_4	TRUE	886	TRB	TRBV5-6*01	None	TRBJ2-7*01	TRBC2*01	TRUE	TRUE	CASSAPDGDYEQYF	TGTGCCAGCAGCGCCCCGGACGGAGACTACGAGCAGTACTTC	2723	1	clonotype360	clonotype360_consensus_2	single TCR
AGGCCGTAGGTCATCT-1	TRUE	AGGCCGTAGGTCATCT-1_contig_1	TRUE	536	TRB	TRBV6-1*01	TRBD1*01	TRBJ2-7*01	TRBC2*01	TRUE	TRUE	CASSLDRAFYEQYF	TGTGCCAGCAGCCTAGACAGGGCATTCTACGAGCAGTACTTC	9831	3	clonotype364	clonotype364_consensus_2	single TCR
AGGCCGTAGGTCATCT-1	TRUE	AGGCCGTAGGTCATCT-1_contig_2	TRUE	560	TRA	TRAV27*01	None	TRAJ26*01	TRAC*01	TRUE	TRUE	CAGGLNYGQNFVF	TGTGCAGGAGGTCTTAACTATGGTCAGAATTTTGTCTTT	10194	3	clonotype364	clonotype364_consensus_1	single TCR
AGGCCGTGTAAGTGGC-1	TRUE	AGGCCGTGTAAGTGGC-1_contig_1	TRUE	745	TRB	TRBV18*01	TRBD1*01	TRBJ1-5*01	TRBC1*01	TRUE	TRUE	CASSPDRLNQPQHF	TGTGCCAGCTCACCGGACAGACTCAATCAGCCCCAGCATTTT	13093	5	clonotype366	clonotype366_consensus_1	single TCR
AGGCCGTGTAAGTGGC-1	TRUE	AGGCCGTGTAAGTGGC-1_contig_2	TRUE	559	TRA	TRAV13-2*01	None	TRAJ43*01	TRAC*01	TRUE	TRUE	CAENFPPQDMRF	TGTGCAGAGAACTTCCCCCCCCAGGACATGCGCTTT	3557	1	clonotype366	clonotype366_consensus_2	single TCR
AGGCCGTTCCTTAATC-1	TRUE	AGGCCGTTCCTTAATC-1_contig_1	TRUE	708	TRB	TRBV6-5*01	TRBD1*01	TRBJ2-5*01	TRBC2*01	TRUE	TRUE	CASSSQRADRYQETQYF	TGTGCCAGCAGTTCACAAAGAGCGGACAGGTACCAAGAGACCCAGTACTTC	12492	4	clonotype369	clonotype369_consensus_2	single TCR
AGGCCGTTCCTTAATC-1	TRUE	AGGCCGTTCCTTAATC-1_contig_2	TRUE	459	TRA	TRAV9-2*01	None	TRAJ28*01	TRAC*01	TRUE	TRUE	CALSPYSGAGSYQLTF	TGTGCTCTGAGTCCATACTCTGGGGCTGGGAGTTACCAACTCACTTTC	4182	1	clonotype369	clonotype369_consensus_1	single TCR
AGGGAGTCACCGATAT-1	TRUE	AGGGAGTCACCGATAT-1_contig_1	TRUE	739	TRA	TRAV8-3*01	None	TRAJ4*01	TRAC*01	TRUE	TRUE	CAVGPRGGYNKLIF	TGTGCTGTGGGCCCTAGGGGTGGCTACAATAAGCTGATTTTT	15542	5	clonotype370	clonotype370_consensus_1	single TCR
AGGGAGTCACCGATAT-1	TRUE	AGGGAGTCACCGATAT-1_contig_2	TRUE	680	TRB	TRBV2*01	TRBD2*01	TRBJ1-6*01	TRBC1*01	TRUE	TRUE	CAIRVNDSPLHF	TGTGCCATCAGGGTTAACGATTCACCCCTCCACTTT	9802	3	clonotype370	clonotype370_consensus_2	single TCR
AGGGAGTGTAACGTTC-1	TRUE	AGGGAGTGTAACGTTC-1_contig_1	TRUE	680	TRB	TRBV5-1*01	TRBD1*01	TRBJ1-3*01	TRBC1*01	TRUE	TRUE	CASSLSGYGNTIYF	TGCGCCAGCAGCTTGTCAGGGTATGGAAACACCATATATTTT	9507	3	clonotype371	clonotype371_consensus_2	single TCR
AGGGAGTGTAACGTTC-1	TRUE	AGGGAGTGTAACGTTC-1_contig_2	TRUE	513	TRA	TRAV29/DV5*01	None	TRAJ34*01	TRAC*01	TRUE	TRUE	CAAIVSYNTDKLIF	TGTGCAGCAATCGTATCTTATAACACCGACAAGCTCATCTTT	8224	2	clonotype371	clonotype371_consensus_1	single TCR
AGGGAGTGTGACCAAG-1	TRUE	AGGGAGTGTGACCAAG-1_contig_1	TRUE	658	TRB	TRBV7-9*01	TRBD1*01	TRBJ2-5*01	TRBC2*01	TRUE	TRUE	CASSLRGPQETQYF	TGTGCCAGCAGCTTAAGGGGGCCCCAAGAGACCCAGTACTTC	15947	5	clonotype372	clonotype372_consensus_2	single TCR
AGGGAGTGTGACCAAG-1	TRUE	AGGGAGTGTGACCAAG-1_contig_3	TRUE	658	TRA	TRAV8-2*01	None	TRAJ11*01	TRAC*01	TRUE	TRUE	CVVTQYSTLTF	TGTGTTGTGACCCAATACAGCACCCTCACCTTT	3000	1	clonotype372	clonotype372_consensus_1	single TCR
AGGGAGTTCAGCATGT-1	TRUE	AGGGAGTTCAGCATGT-1_contig_1	TRUE	576	TRA	TRAV19*01	None	TRAJ8*01	TRAC*01	TRUE	TRUE	CALSDGFQKLVF	TGTGCTCTGAGTGATGGCTTTCAGAAACTTGTATTT	5734	2	clonotype373	clonotype373_consensus_1	single TCR
AGGGAGTTCAGCATGT-1	TRUE	AGGGAGTTCAGCATGT-1_contig_3	TRUE	696	TRB	TRBV13*01	None	TRBJ2-2*01	TRBC2*01	TRUE	TRUE	CASSAESTGELFF	TGTGCCAGCAGCGCGGAGTCCACCGGGGAGCTGTTTTTT	20627	6	clonotype373	clonotype373_consensus_2	single TCR
AGGGAGTTCTCTGAGA-1	TRUE	AGGGAGTTCTCTGAGA-1_contig_1	TRUE	897	TRB	TRBV28*01	TRBD1*01	TRBJ1-2*01	TRBC1*01	TRUE	TRUE	CASRQGYGYTF	TGTGCCAGCCGACAGGGATATGGCTACACCTTC	2555	2	clonotype374	clonotype374_consensus_2	single TCR
AGGGAGTTCTCTGAGA-1	TRUE	AGGGAGTTCTCTGAGA-1_contig_2	TRUE	558	TRA	TRAV16*01	None	TRAJ13*02	TRAC*01	TRUE	TRUE	CALSGLRGGYQKVTF	TGTGCTCTAAGTGGCCTGAGGGGGGGTTACCAGAAAGTTACCTTT	15455	4	clonotype374	clonotype374_consensus_1	single TCR
AGGGATGCAAGCGAGT-1	TRUE	AGGGATGCAAGCGAGT-1_contig_1	TRUE	511	TRA	TRAV38-2/DV8*01	None	TRAJ57*01	TRAC*01	TRUE	TRUE	CAYRSAGFHKGGSEKLVF	TGTGCTTATAGGAGCGCAGGTTTCCATAAGGGCGGATCTGAAAAGCTGGTCTTT	3552	1	clonotype375	clonotype375_consensus_1	single TCR
AGGGATGCAAGCGAGT-1	TRUE	AGGGATGCAAGCGAGT-1_contig_2	TRUE	499	TRB	TRBV11-2*03	TRBD1*01	TRBJ2-1*01	TRBC2*01	TRUE	TRUE	CASSGRQGEYINEQFF	TGTGCCAGCAGCGGGCGACAGGGCGAGTATATCAATGAGCAGTTCTTC	6903	2	clonotype375	clonotype375_consensus_2	single TCR
AGGGATGCACAGACTT-1	TRUE	AGGGATGCACAGACTT-1_contig_1	TRUE	549	TRA	TRAV26-1*01	None	TRAJ28*01	TRAC*01	TRUE	TRUE	CIVRLSYSGAGSYQLTF	TGCATCGTCAGACTCTCATACTCTGGGGCTGGGAGTTACCAACTCACTTTC	3884	2	clonotype376	clonotype376_consensus_2	single TCR
AGGGATGCACAGACTT-1	TRUE	AGGGATGCACAGACTT-1_contig_3	TRUE	489	TRB	TRBV20-1*02	TRBD1*01	TRBJ1-2*01	TRBC1*01	TRUE	TRUE	CSAPTGRRYGYTF	TGCAGTGCCCCGACAGGGCGTCGGTATGGCTACACCTTC	95	1	clonotype376	clonotype376_consensus_1	single TCR
AGGGATGCAGACGTAG-1	TRUE	AGGGATGCAGACGTAG-1_contig_1	TRUE	665	TRB	TRBV20-1*02	TRBD1*01	TRBJ1-4*01	TRBC1*01	TRUE	TRUE	CSARARDRGFEKLFF	TGCAGTGCTAGAGCCCGGGACAGGGGTTTTGAAAAACTGTTTTTT	4983	2	clonotype377	clonotype377_consensus_1	single TCR
AGGGATGCAGACGTAG-1	TRUE	AGGGATGCAGACGTAG-1_contig_3	TRUE	484	TRA	TRAV21*01	None	TRAJ48*01	TRAC*01	TRUE	TRUE	CAVRQGINEKLTF	TGTGCTGTGCGGCAGGGGATAAATGAGAAATTAACCTTT	4518	1	clonotype377	clonotype377_consensus_2	single TCR
AGGGATGGTCCATCCT-1	TRUE	AGGGATGGTCCATCCT-1_contig_1	TRUE	497	TRB	TRBV29-1*01	TRBD2*01	TRBJ2-3*01	TRBC2*01	TRUE	TRUE	CSVDLAVGDTQYF	TGCAGCGTTGATCTAGCGGTGGGGGATACGCAGTATTTT	8013	3	clonotype378	clonotype378_consensus_1	single TCR
AGGGATGGTCCATCCT-1	TRUE	AGGGATGGTCCATCCT-1_contig_2	TRUE	550	TRA	TRAV10*01	None	TRAJ44*01	TRAC*01	TRUE	TRUE	CVVSAITAQGTASKLTF	TGTGTGGTGAGCGCGATCACGGCCCAAGGCACTGCCAGTAAACTCACCTTT	3121	1	clonotype378	clonotype378_consensus_2	single TCR
AGGGATGTCACGCATA-1	TRUE	AGGGATGTCACGCATA-1_contig_1	TRUE	658	TRB	TRBV28*01	TRBD2*01	TRBJ2-5*01	TRBC2*01	TRUE	TRUE	CASRQTRDRETQYF	TGTGCCAGCAGGCAAACTAGGGATCGGGAGACCCAGTACTTC	10346	3	clonotype379	clonotype379_consensus_2	single TCR
AGGGATGTCACGCATA-1	TRUE	AGGGATGTCACGCATA-1_contig_3	TRUE	890	TRA	TRAV26-1*01	None	TRAJ37*02	TRAC*01	TRUE	TRUE	CIVRVARGGSSNTGKLIF	TGCATCGTCAGAGTCGCGCGGGGTGGCTCTAGCAACACAGGCAAACTAATCTTT	5296	2	clonotype379	clonotype379_consensus_1	single TCR
AGGGATGTCCTAGGGC-1	TRUE	AGGGATGTCCTAGGGC-1_contig_1	TRUE	483	TRB	TRBV28*01	TRBD2*01	TRBJ2-3*01	TRBC2*01	TRUE	TRUE	CASSFPETSGGGRYF	TGTGCCAGCAGTTTCCCGGAGACTAGCGGAGGGGGACGGTATTTT	11556	4	clonotype380	clonotype380_consensus_1	single TCR
AGGGATGTCCTAGGGC-1	TRUE	AGGGATGTCCTAGGGC-1_contig_2	TRUE	493	TRA	TRAV9-2*01	None	TRAJ12*01	TRAC*01	TRUE	TRUE	CAREDSSYKLIF	TGTGCTCGGGAGGATAGCAGCTATAAATTGATCTTC	7406	2	clonotype380	clonotype380_consensus_2	single TCR
AGGGTGAAGCGTTCCG-1	TRUE	AGGGTGAAGCGTTCCG-1_contig_1	TRUE	719	TRB	TRBV2*01	TRBD2*01	TRBJ2-2*01	TRBC2*01	TRUE	TRUE	CASRLALNTGELFF	TGTGCCAGCCGACTAGCGCTGAACACCGGGGAGCTGTTTTTT	12180	5	clonotype381	clonotype381_consensus_2	single TCR
AGGGTGAAGCGTTCCG-1	TRUE	AGGGTGAAGCGTTCCG-1_contig_3	TRUE	681	TRA	TRAV8-3*01	None	TRAJ49*01	TRAC*01	TRUE	TRUE	CAVVFTNTGNQFYF	TGTGCTGTGGTGTTCACTAACACCGGTAACCAGTTCTATTTT	3367	1	clonotype381	clonotype381_consensus_1	single TCR
AGGTCATCATTGGTAC-1	TRUE	AGGTCATCATTGGTAC-1_contig_1	TRUE	503	TRA	TRAV9-2*01	None	TRAJ31*01	TRAC*01	TRUE	TRUE	CALVLDNARLMF	TGTGCTCTGGTCCTAGACAATGCCAGACTCATGTTT	2417	1	clonotype384	clonotype384_consensus_1	single TCR
AGGTCATCATTGGTAC-1	TRUE	AGGTCATCATTGGTAC-1_contig_4	TRUE	659	TRB	TRBV27*01	TRBD2*01	TRBJ2-6*01	TRBC1*01	TRUE	TRUE	CASSPPGIHSGANVLTF	TGTGCCAGCAGTCCCCCGGGGATCCACTCTGGGGCCAACGTCCTGACTTTC	3227	1	clonotype384	clonotype384_consensus_2	single TCR
AGGTCATTCCTCTAGC-1	TRUE	AGGTCATTCCTCTAGC-1_contig_1	TRUE	656	TRB	TRBV4-1*01	TRBD2*01	TRBJ2-5*01	TRBC2*01	TRUE	TRUE	CASSLAVQETQYF	TGCGCCAGCTCCCTAGCGGTCCAAGAGACCCAGTACTTC	31855	10	clonotype386	clonotype386_consensus_1	single TCR
AGGTCATTCCTCTAGC-1	TRUE	AGGTCATTCCTCTAGC-1_contig_2	TRUE	526	TRA	TRAV1-1*01	None	TRAJ10*01	TRAC*01	TRUE	TRUE	CAVRDKGGGNKLTF	TGCGCTGTGAGAGATAAGGGAGGAGGAAACAAACTCACCTTT	8706	2	clonotype386	clonotype386_consensus_2	single TCR
AGGTCCGGTAGGGTAC-1	TRUE	AGGTCCGGTAGGGTAC-1_contig_1	TRUE	494	TRA	TRAV10*01	None	TRAJ18*01	TRAC*01	TRUE	TRUE	CVVSDRGSTLGRLYF	TGTGTGGTGAGCGACAGAGGCTCAACCCTGGGGAGGCTATACTTT	4072	1	clonotype390	clonotype390_consensus_1	single TCR
AGGTCCGGTAGGGTAC-1	TRUE	AGGTCCGGTAGGGTAC-1_contig_2	TRUE	494	TRB	TRBV25-1*01	TRBD1*01	TRBJ1-1*01	TRBC1*01	TRUE	TRUE	CASSPLQTGDRAEAFF	TGTGCCAGCAGTCCCCTCCAGACAGGGGATAGGGCTGAAGCTTTCTTT	6198	3	clonotype390	clonotype390_consensus_2	single TCR
AGGTCCGTCAACGCTA-1	TRUE	AGGTCCGTCAACGCTA-1_contig_1	TRUE	508	TRB	TRBV6-5*01	TRBD1*01	TRBJ2-1*01	TRBC2*01	TRUE	TRUE	CASRAGPYNEQFF	TGTGCCAGCAGGGCAGGGCCCTACAATGAGCAGTTCTTC	6238	2	clonotype391	clonotype391_consensus_1	single TCR
AGGTCCGTCAACGCTA-1	TRUE	AGGTCCGTCAACGCTA-1_contig_3	TRUE	528	TRA	TRAV27*01	None	TRAJ40*01	TRAC*01	TRUE	TRUE	CAGRTSGTYKYIF	TGTGCAGGACGTACCTCAGGAACCTACAAATACATCTTT	4523	1	clonotype391	clonotype391_consensus_2	single TCR
AGGTCCGTCCACGCAG-1	TRUE	AGGTCCGTCCACGCAG-1_contig_1	TRUE	857	TRB	TRBV9*01	TRBD2*02	TRBJ2-1*01	TRBC2*01	TRUE	TRUE	CASGLGGTYNEQFF	TGTGCCAGCGGCCTCGGAGGCACCTACAATGAGCAGTTCTTC	2796	2	clonotype392	clonotype392_consensus_1	single TCR
AGGTCCGTCCACGCAG-1	TRUE	AGGTCCGTCCACGCAG-1_contig_3	TRUE	578	TRA	TRAV21*01	None	TRAJ42*01	TRAC*01	TRUE	TRUE	CAVRMNYGGSQGNLIF	TGTGCTGTTCGCATGAATTATGGAGGAAGCCAAGGAAATCTCATCTTT	9991	4	clonotype392	clonotype392_consensus_2	single TCR
AGTAGTCCAGCTGTGC-1	TRUE	AGTAGTCCAGCTGTGC-1_contig_2	TRUE	659	TRB	TRBV5-1*01	TRBD1*01	TRBJ2-7*01	TRBC1*01	TRUE	TRUE	CASSLGTGMYEQYF	TGCGCCAGCAGCTTGGGTACAGGGATGTACGAGCAGTACTTC	2901	1	clonotype394	clonotype394_consensus_1	single TCR
AGTAGTCCAGCTGTGC-1	TRUE	AGTAGTCCAGCTGTGC-1_contig_3	TRUE	672	TRA	TRAV23/DV6*01	None	TRAJ58*01	TRAC*01	TRUE	TRUE	CAARSSGSRLTF	TGTGCAGCTCGCTCCAGTGGCTCTAGGTTGACCTTT	16627	5	clonotype394	clonotype394_consensus_2	single TCR
AGTAGTCTCATCACCC-1	TRUE	AGTAGTCTCATCACCC-1_contig_1	TRUE	506	TRB	TRBV24-1*02	TRBD2*01	TRBJ2-1*01	TRBC2*01	TRUE	TRUE	CATSDPTGSGGYNEQFF	TGTGCCACCAGTGATCCCACGGGGTCGGGGGGCTACAATGAGCAGTTCTTC	6893	2	clonotype397	clonotype397_consensus_1	single TCR
AGTAGTCTCATCACCC-1	TRUE	AGTAGTCTCATCACCC-1_contig_2	TRUE	525	TRA	TRAV1-1*01	None	TRAJ23*01	TRAC*01	TRUE	TRUE	CAVRGQGGKLIF	TGCGCTGTGAGGGGACAGGGAGGAAAGCTTATCTTC	12123	3	clonotype397	clonotype397_consensus_2	single TCR
AGTCTTTGTTGGTGGA-1	TRUE	AGTCTTTGTTGGTGGA-1_contig_1	TRUE	543	TRA	TRAV36/DV7*01	None	TRAJ50*01	TRAC*01	TRUE	TRUE	CAVGGTSYDKVIF	TGTGCTGTGGGAGGAACCTCCTACGACAAGGTGATATTT	3164	1	clonotype401	clonotype401_consensus_1	single TCR
AGTCTTTGTTGGTGGA-1	TRUE	AGTCTTTGTTGGTGGA-1_contig_2	TRUE	659	TRB	TRBV4-1*01	None	TRBJ2-7*01	TRBC2*01	TRUE	TRUE	CASSQDRSYYEQYF	TGCGCCAGCAGCCAAGATCGGAGTTACTACGAGCAGTACTTC	13334	5	clonotype401	clonotype401_consensus_2	single TCR
AGTCTTTTCGGCTTGG-1	TRUE	AGTCTTTTCGGCTTGG-1_contig_1	TRUE	802	TRB	TRBV18*01	TRBD1*01	TRBJ1-5*01	TRBC1*01	TRUE	TRUE	CASSPQSRTGTNQPQHF	TGTGCCAGCTCACCCCAGAGCCGGACAGGAACGAATCAGCCCCAGCATTTT	9853	3	clonotype404	clonotype404_consensus_1	single TCR
AGTCTTTTCGGCTTGG-1	TRUE	AGTCTTTTCGGCTTGG-1_contig_4	TRUE	521	TRA	TRAV29/DV5*01	None	TRAJ50*01	TRAC*01	TRUE	TRUE	CAASALKTSYDKVIF	TGTGCAGCAAGCGCGCTTAAAACCTCCTACGACAAGGTGATATTT	2644	1	clonotype404	clonotype404_consensus_2	single TCR
AGTGAGGAGCTGTTCA-1	TRUE	AGTGAGGAGCTGTTCA-1_contig_1	TRUE	848	TRA	TRAV8-1*01	None	TRAJ9*01	TRAC*01	TRUE	TRUE	CAVTHTGGFKTIF	TGTGCCGTGACCCATACTGGAGGCTTCAAAACTATCTTT	18163	5	clonotype405	clonotype405_consensus_1	single TCR
AGTGAGGAGCTGTTCA-1	TRUE	AGTGAGGAGCTGTTCA-1_contig_2	TRUE	702	TRB	TRBV7-8*01	TRBD1*01	TRBJ1-5*01	TRBC1*01	TRUE	TRUE	CASSSHIWGQSNQPQHF	TGTGCCAGCAGCTCACATATATGGGGACAGAGCAATCAGCCCCAGCATTTT	11019	3	clonotype405	clonotype405_consensus_2	single TCR
AGTGAGGGTCAGGACA-1	TRUE	AGTGAGGGTCAGGACA-1_contig_1	TRUE	683	TRB	TRBV7-9*01	TRBD2*01	TRBJ2-7*01	TRBC2*01	TRUE	TRUE	CASSSSIVGNWEQYF	TGTGCCAGCAGCTCAAGCATCGTGGGGAATTGGGAGCAGTACTTC	21337	6	clonotype407	clonotype407_consensus_1	single TCR
AGTGAGGGTCAGGACA-1	TRUE	AGTGAGGGTCAGGACA-1_contig_2	TRUE	551	TRA	TRAV12-2*01	None	TRAJ4*01	TRAC*01	TRUE	TRUE	CAGPPGGGYNKLIF	TGTGCCGGACCCCCGGGTGGTGGCTACAATAAGCTGATTTTT	3617	1	clonotype407	clonotype407_consensus_2	single TCR
AGTGGGAAGATAGGAG-1	TRUE	AGTGGGAAGATAGGAG-1_contig_1	TRUE	584	TRA	TRAV26-1*01	None	TRAJ52*01	TRAC*01	TRUE	TRUE	CIVRDSNAGGTSYGKLTF	TGCATCGTCAGGGATTCTAATGCTGGTGGTACTAGCTATGGAAAGCTGACATTT	5586	2	clonotype408	clonotype408_consensus_1	single TCR
AGTGGGAAGATAGGAG-1	TRUE	AGTGGGAAGATAGGAG-1_contig_3	TRUE	655	TRB	TRBV28*01	TRBD2*02	TRBJ2-4*01	TRBC2*01	TRUE	TRUE	CASSASSGRRNIQYF	TGTGCCAGCAGTGCCTCTAGCGGGAGGAGGAACATTCAGTACTTC	14476	4	clonotype408	clonotype408_consensus_2	single TCR
AGTGGGACAGAAGCAC-1	TRUE	AGTGGGACAGAAGCAC-1_contig_1	TRUE	668	TRA	TRAV8-4*01	None	TRAJ37*02	TRAC*01	TRUE	TRUE	CAVSDDGSSNTGKLIF	TGTGCTGTGAGTGACGATGGCTCTAGCAACACAGGCAAACTAATCTTT	6120	2	clonotype410	clonotype410_consensus_1	single TCR
AGTGGGACAGAAGCAC-1	TRUE	AGTGGGACAGAAGCAC-1_contig_2	TRUE	689	TRB	TRBV14*01	None	TRBJ2-3*01	TRBC2*01	TRUE	TRUE	CASSQDPPDTQYF	TGTGCCAGCAGCCAAGACCCTCCGGATACGCAGTATTTT	6347	2	clonotype410	clonotype410_consensus_2	single TCR
AGTGGGACATTATCTC-1	TRUE	AGTGGGACATTATCTC-1_contig_1	TRUE	528	TRA	TRAV9-2*01	None	TRAJ9*01	TRAC*01	TRUE	TRUE	CALSVNTGGFKTIF	TGTGCTCTGAGTGTCAATACTGGAGGCTTCAAAACTATCTTT	8972	4	clonotype411	clonotype411_consensus_2	single TCR
AGTGGGACATTATCTC-1	TRUE	AGTGGGACATTATCTC-1_contig_2	TRUE	600	TRB	TRBV25-1*01	None	TRBJ2-7*01	TRBC2*01	TRUE	TRUE	CASSEFKGYEQYF	TGTGCCAGCAGTGAGTTTAAAGGGTACGAGCAGTACTTC	1357	1	clonotype411	clonotype411_consensus_1	single TCR
AGTGTCACAATGGAAT-1	TRUE	AGTGTCACAATGGAAT-1_contig_1	TRUE	673	TRB	TRBV4-1*01	TRBD1*01	TRBJ2-7*01	TRBC2*01	TRUE	TRUE	CASSQDSFIGAGHPYEQYF	TGCGCCAGCAGCCAAGATTCTTTCATCGGGGCAGGGCACCCCTACGAGCAGTACTTC	10872	4	clonotype416	clonotype416_consensus_2	single TCR
AGTGTCACAATGGAAT-1	TRUE	AGTGTCACAATGGAAT-1_contig_2	TRUE	625	TRA	TRAV8-4*01	None	TRAJ31*01	TRAC*01	TRUE	TRUE	CAVSDVTRNNNARLMF	TGTGCTGTGAGTGATGTAACCCGGAATAACAATGCCAGACTCATGTTT	3645	1	clonotype416	clonotype416_consensus_1	single TCR
AGTGTCATCACGAAGG-1	TRUE	AGTGTCATCACGAAGG-1_contig_1	TRUE	685	TRB	TRBV5-1*01	None	TRBJ2-1*01	TRBC2*01	TRUE	TRUE	CASSLVLGSSYNEQFF	TGCGCCAGCAGCTTGGTGCTGGGAAGCTCCTACAATGAGCAGTTCTTC	29233	9	clonotype417	clonotype417_consensus_2	single TCR
AGTGTCATCACGAAGG-1	TRUE	AGTGTCATCACGAAGG-1_contig_2	TRUE	784	TRA	TRAV12-1*01	None	TRAJ32*02	TRAC*01	TRUE	TRUE	CVVNTLVYGGATNKLIF	TGTGTGGTGAACACCCTAGTTTATGGTGGTGCTACAAACAAGCTCATCTTT	12870	4	clonotype417	clonotype417_consensus_1	single TCR
AGTTGGTAGAGTAAGG-1	TRUE	AGTTGGTAGAGTAAGG-1_contig_1	TRUE	711	TRB	TRBV18*01	None	TRBJ2-3*01	TRBC2*01	TRUE	TRUE	CASSPPLTDTQYF	TGTGCCAGCTCACCACCTTTGACAGATACGCAGTATTTT	12821	4	clonotype419	clonotype419_consensus_1	single TCR
AGTTGGTAGAGTAAGG-1	TRUE	AGTTGGTAGAGTAAGG-1_contig_2	TRUE	646	TRA	TRAV14/DV4*01	None	TRAJ57*01	TRAC*01	TRUE	TRUE	CAMRESTQGGSEKLVF	TGTGCAATGAGAGAGTCAACTCAGGGCGGATCTGAAAAGCTGGTCTTT	3563	2	clonotype419	clonotype419_consensus_2	single TCR
AGTTGGTAGCCCTAAT-1	TRUE	AGTTGGTAGCCCTAAT-1_contig_1	TRUE	498	TRA	TRAV21*01	None	TRAJ24*02	TRAC*01	TRUE	TRUE	CAVRLGSWGKLQF	TGTGCTGTGAGGCTGGGCAGCTGGGGGAAATTGCAGTTT	16814	4	clonotype420	clonotype420_consensus_2	single TCR
AGTTGGTAGCCCTAAT-1	TRUE	AGTTGGTAGCCCTAAT-1_contig_2	TRUE	479	TRB	TRBV29-1*01	None	TRBJ2-3*01	TRBC2*01	TRUE	TRUE	CSVEVGSPATDTQYF	TGCAGCGTTGAAGTAGGCAGCCCCGCCACAGATACGCAGTATTTT	6395	2	clonotype420	clonotype420_consensus_1	single TCR
AGTTGGTCAACGCACC-1	TRUE	AGTTGGTCAACGCACC-1_contig_1	TRUE	710	TRB	TRBV18*01	TRBD2*02	TRBJ2-4*01	TRBC2*01	TRUE	TRUE	CASSPPGGQNIQYF	TGTGCCAGCTCACCCCCGGGAGGCCAAAACATTCAGTACTTC	10273	3	clonotype421	clonotype421_consensus_2	single TCR
AGTTGGTCAACGCACC-1	TRUE	AGTTGGTCAACGCACC-1_contig_3	TRUE	531	TRA	TRAV29/DV5*01	None	TRAJ50*01	TRAC*01	TRUE	TRUE	CAASEGTSYDKVIF	TGTGCAGCAAGCGAGGGAACCTCCTACGACAAGGTGATATTT	4761	1	clonotype421	clonotype421_consensus_1	single TCR
ATAACGCAGAAGGTTT-1	TRUE	ATAACGCAGAAGGTTT-1_contig_1	TRUE	520	TRB	TRBV4-1*01	TRBD1*01	TRBJ1-5*01	TRBC1*01	TRUE	TRUE	CASSRAQWGRNQPQHF	TGCGCCAGCAGCCGAGCCCAATGGGGGAGGAATCAGCCCCAGCATTTT	3873	2	clonotype425	clonotype425_consensus_2	single TCR
ATAACGCAGAAGGTTT-1	TRUE	ATAACGCAGAAGGTTT-1_contig_3	TRUE	587	TRA	TRAV22*01	None	TRAJ45*01	TRAC*01	TRUE	TRUE	CAVERLMYSGGGADGLTF	TGTGCTGTGGAGCGCCTAATGTATTCAGGAGGAGGTGCTGACGGACTCACCTTT	8944	3	clonotype425	clonotype425_consensus_1	single TCR
ATAACGCAGCCGGTAA-1	TRUE	ATAACGCAGCCGGTAA-1_contig_1	TRUE	483	TRA	TRAV1-1*01	None	TRAJ39*01	TRAC*01	TRUE	TRUE	CAVNNAGNMLTF	TGCGCTGTAAATAATGCAGGCAACATGCTCACCTTT	8276	2	clonotype426	clonotype426_consensus_2	single TCR
ATAACGCAGCCGGTAA-1	TRUE	ATAACGCAGCCGGTAA-1_contig_2	TRUE	819	TRB	TRBV19*01	TRBD2*02	TRBJ2-7*01	TRBC2*01	TRUE	TRUE	CASSIHLDGTYEQYF	TGTGCCAGTAGTATCCACCTGGACGGGACCTACGAGCAGTACTTC	6701	3	clonotype426	clonotype426_consensus_1	single TCR
ATAACGCTCTCCAACC-1	TRUE	ATAACGCTCTCCAACC-1_contig_1	TRUE	696	TRB	TRBV3-1*01	TRBD1*01	TRBJ1-1*01	TRBC1*01	TRUE	TRUE	CASSHGQFNTEAFF	TGTGCCAGCAGCCACGGACAGTTTAACACTGAAGCTTTCTTT	16490	7	clonotype429	clonotype429_consensus_1	single TCR
ATAACGCTCTCCAACC-1	TRUE	ATAACGCTCTCCAACC-1_contig_3	TRUE	510	TRA	TRAV6*01	None	TRAJ42*01	TRAC*01	TRUE	TRUE	CALEDYGGSQGNLIF	TGTGCTCTAGAAGATTATGGAGGAAGCCAAGGAAATCTCATCTTT	3133	1	clonotype429	clonotype429_consensus_2	single TCR
ATAAGAGAGGGAGTAA-1	TRUE	ATAAGAGAGGGAGTAA-1_contig_1	TRUE	503	TRB	TRBV5-8*01	TRBD2*01	TRBJ2-5*01	TRBC2*01	TRUE	TRUE	CASSLAGGTKTQYF	TGTGCCAGCAGCTTGGCCGGGGGGACAAAGACCCAGTACTTC	4203	2	clonotype431	clonotype431_consensus_1	single TCR
ATAAGAGAGGGAGTAA-1	TRUE	ATAAGAGAGGGAGTAA-1_contig_2	TRUE	677	TRA	TRAV8-3*01	None	TRAJ20*01	TRAC*01	TRUE	TRUE	CAGDFNDYKLSF	TGTGCTGGGGATTTTAACGACTACAAGCTCAGCTTT	5382	2	clonotype431	clonotype431_consensus_2	single TCR
ATAAGAGGTGTGAAAT-1	TRUE	ATAAGAGGTGTGAAAT-1_contig_2	TRUE	685	TRB	TRBV7-9*03	TRBD1*01	TRBJ1-1*01	TRBC1*01	TRUE	TRUE	CASSTDSLAEAFF	TGTGCCAGCAGCACGGACAGCTTGGCTGAAGCTTTCTTT	15934	5	clonotype434	clonotype434_consensus_1	single TCR
ATAAGAGGTGTGAAAT-1	TRUE	ATAAGAGGTGTGAAAT-1_contig_4	TRUE	498	TRA	TRAV9-2*01	None	TRAJ49*01	TRAC*01	TRUE	TRUE	CALSDQGGGNQFYF	TGTGCTCTGAGTGACCAAGGCGGGGGTAACCAGTTCTATTTT	5233	2	clonotype434	clonotype434_consensus_2	single TCR
ATAGACCAGACGCTTT-1	TRUE	ATAGACCAGACGCTTT-1_contig_1	TRUE	667	TRB	TRBV19*01	TRBD1*01	TRBJ2-1*01	TRBC2*01	TRUE	TRUE	CASSIIGASYNEQFF	TGTGCCAGTAGTATAATCGGGGCCTCCTACAATGAGCAGTTCTTC	8215	4	clonotype436	clonotype436_consensus_1	single TCR
ATAGACCAGACGCTTT-1	TRUE	ATAGACCAGACGCTTT-1_contig_2	TRUE	771	TRA	TRAV29/DV5*01	None	TRAJ49*01	TRAC*01	TRUE	TRUE	CAASARKNTGNQFYF	TGTGCAGCAAGCGCGCGGAAGAACACCGGTAACCAGTTCTATTTT	5546	3	clonotype436	clonotype436_consensus_2	single TCR
ATAGACCCACAGATTC-1	TRUE	ATAGACCCACAGATTC-1_contig_1	TRUE	653	TRA	TRAV35*01	None	TRAJ54*01	TRAC*01	TRUE	TRUE	CAGQTSGAQKLVF	TGTGCTGGCCAAACGTCGGGAGCCCAGAAGCTGGTATTT	9418	2	clonotype439	clonotype439_consensus_2	single TCR
ATAGACCCACAGATTC-1	TRUE	ATAGACCCACAGATTC-1_contig_2	TRUE	686	TRB	TRBV14*01	None	TRBJ1-4*01	TRBC1*01	TRUE	TRUE	CASSLSKGKLFF	TGTGCCAGCAGCCTCTCCAAGGGAAAACTGTTTTTT	2431	1	clonotype439	clonotype439_consensus_1	single TCR
ATAGACCCAGCTGCAC-1	TRUE	ATAGACCCAGCTGCAC-1_contig_1	TRUE	662	TRB	TRBV4-1*01	None	TRBJ2-3*01	TRBC2*01	TRUE	TRUE	CASSQVKGFPDTQYF	TGCGCCAGCAGCCAAGTTAAAGGGTTCCCAGATACGCAGTATTTT	14685	5	clonotype440	clonotype440_consensus_2	single TCR
ATAGACCCAGCTGCAC-1	TRUE	ATAGACCCAGCTGCAC-1_contig_2	TRUE	559	TRA	TRAV5*01	None	TRAJ13*02	TRAC*01	TRUE	TRUE	CAEQSGGYQKVTF	TGTGCAGAGCAATCTGGGGGTTACCAGAAAGTTACCTTT	1591	1	clonotype440	clonotype440_consensus_1	single TCR
ATAGACCTCGAACTGT-1	TRUE	ATAGACCTCGAACTGT-1_contig_1	TRUE	547	TRA	TRAV12-2*01	None	TRAJ5*01	TRAC*01	TRUE	TRUE	CAAPDRRRALTF	TGTGCCGCCCCGGACCGGAGGAGAGCACTTACTTTT	7566	2	clonotype443	clonotype443_consensus_1	single TCR
ATAGACCTCGAACTGT-1	TRUE	ATAGACCTCGAACTGT-1_contig_2	TRUE	851	TRB	TRBV5-6*01	None	TRBJ2-2*01	TRBC2*01	TRUE	TRUE	CASSIGSGGELFF	TGTGCCAGCAGCATAGGGTCCGGGGGGGAGCTGTTTTTT	7184	4	clonotype443	clonotype443_consensus_2	single TCR
ATAGACCTCTTGTACT-1	TRUE	ATAGACCTCTTGTACT-1_contig_1	TRUE	739	TRB	TRBV28*01	None	TRBJ2-7*01	TRBC2*01	TRUE	TRUE	CASSTPLGYEQYF	TGTGCCAGCAGTACACCCCTGGGGTACGAGCAGTACTTC	14652	5	clonotype444	clonotype444_consensus_2	single TCR
ATAGACCTCTTGTACT-1	TRUE	ATAGACCTCTTGTACT-1_contig_2	TRUE	513	TRA	TRAV38-2/DV8*01	None	TRAJ54*01	TRAC*01	TRUE	TRUE	CAYLLIQGAQKLVF	TGTGCTTATCTTCTAATTCAGGGAGCCCAGAAGCTGGTATTT	11413	4	clonotype444	clonotype444_consensus_1	single TCR
ATCACGACACGACGAA-1	TRUE	ATCACGACACGACGAA-1_contig_1	TRUE	531	TRA	TRAV1-1*01	None	TRAJ9*01	TRAC*01	TRUE	TRUE	CAVRDGTGGFKTIF	TGCGCTGTGAGAGATGGTACTGGAGGCTTCAAAACTATCTTT	4493	2	clonotype445	clonotype445_consensus_2	single TCR
ATCACGACACGACGAA-1	TRUE	ATCACGACACGACGAA-1_contig_2	TRUE	551	TRB	TRBV6-5*01	TRBD2*01	TRBJ2-1*01	TRBC2*01	TRUE	TRUE	CASSRTQDNEQFF	TGTGCCAGCAGCCGTACACAAGACAATGAGCAGTTCTTC	12083	4	clonotype445	clonotype445_consensus_1	single TCR
ATCACGATCATGTGGT-1	TRUE	ATCACGATCATGTGGT-1_contig_1	TRUE	653	TRA	TRAV8-4*01	None	TRAJ10*01	TRAC*01	TRUE	TRUE	CAVSDGTGGGNKLTF	TGTGCTGTGAGTGATGGGACGGGAGGAGGAAACAAACTCACCTTT	6593	2	clonotype447	clonotype447_consensus_1	single TCR
ATCACGATCATGTGGT-1	TRUE	ATCACGATCATGTGGT-1_contig_2	TRUE	515	TRB	TRBV20-1*02	None	TRBJ1-2*01	TRBC1*01	TRUE	TRUE	CSARDQGYTF	TGCAGTGCTAGAGATCAGGGCTACACCTTC	14458	4	clonotype447	clonotype447_consensus_2	single TCR
ATCATCTAGAGGTTGC-1	TRUE	ATCATCTAGAGGTTGC-1_contig_1	TRUE	697	TRB	TRBV3-1*01	TRBD1*01	TRBJ1-5*01	TRBC1*01	TRUE	TRUE	CASSQGQGARQPQHF	TGTGCCAGCAGCCAGGGACAGGGGGCAAGGCAGCCCCAGCATTTT	16597	5	clonotype448	clonotype448_consensus_2	single TCR
ATCATCTAGAGGTTGC-1	TRUE	ATCATCTAGAGGTTGC-1_contig_2	TRUE	710	TRA	TRAV13-2*01	None	TRAJ9*01	TRAC*01	TRUE	TRUE	CAERIWSTGGFKTIF	TGTGCAGAGAGAATATGGAGTACTGGAGGCTTCAAAACTATCTTT	8687	3	clonotype448	clonotype448_consensus_1	single TCR
ATCATCTCACCTTGTC-1	TRUE	ATCATCTCACCTTGTC-1_contig_1	TRUE	494	TRA	TRAV10*01	None	TRAJ26*01	TRAC*01	TRUE	TRUE	CVVSRTDNYGQNFVF	TGTGTGGTGAGCCGAACCGATAACTATGGTCAGAATTTTGTCTTT	4034	1	clonotype450	clonotype450_consensus_1	single TCR
ATCATCTCACCTTGTC-1	TRUE	ATCATCTCACCTTGTC-1_contig_2	TRUE	951	TRB	TRBV19*01	TRBD2*02	TRBJ2-7*01	TRBC2*01	TRUE	TRUE	CASSTLAGVGEQYF	TGTGCCAGTAGTACACTAGCGGGAGTTGGCGAGCAGTACTTC	1502	2	clonotype450	clonotype450_consensus_2	single TCR
ATCATGGGTATTACCG-1	TRUE	ATCATGGGTATTACCG-1_contig_1	TRUE	452	TRA	TRAV2*01	None	TRAJ8*01	TRAC*01	TRUE	TRUE	CAVEGTGFQKLVF	TGTGCTGTGGAAGGTACAGGCTTTCAGAAACTTGTATTT	4518	1	clonotype454	clonotype454_consensus_1	single TCR
ATCATGGGTATTACCG-1	TRUE	ATCATGGGTATTACCG-1_contig_3	TRUE	729	TRB	TRBV6-6*02	TRBD2*01	TRBJ2-1*01	TRBC2*01	TRUE	TRUE	CASKSGTSGGAARNEQFF	TGTGCCAGCAAATCCGGGACTAGCGGGGGGGCTGCGAGGAATGAGCAGTTCTTC	20580	6	clonotype454	clonotype454_consensus_2	single TCR
ATCATGGTCCTCGCAT-1	TRUE	ATCATGGTCCTCGCAT-1_contig_1	TRUE	510	TRA	TRAV23/DV6*01	None	TRAJ48*01	TRAC*01	TRUE	TRUE	CAATFFGNEKLTF	TGTGCAGCAACCTTCTTTGGAAATGAGAAATTAACCTTT	4172	1	clonotype455	clonotype455_consensus_2	single TCR
ATCATGGTCCTCGCAT-1	TRUE	ATCATGGTCCTCGCAT-1_contig_2	TRUE	658	TRB	TRBV4-1*01	None	TRBJ2-1*01	TRBC2*01	TRUE	TRUE	CASSQDDLLDEQFF	TGCGCCAGCAGCCAAGATGACCTGTTGGATGAGCAGTTCTTC	21102	8	clonotype455	clonotype455_consensus_1	single TCR
ATCCACCGTACCGTAT-1	TRUE	ATCCACCGTACCGTAT-1_contig_1	TRUE	839	TRB	TRBV5-8*01	None	TRBJ2-7*01	TRBC2*01	TRUE	TRUE	CASSHPYEQYF	TGTGCCAGCAGCCATCCCTACGAGCAGTACTTC	6812	3	clonotype457	clonotype457_consensus_1	single TCR
ATCCACCGTACCGTAT-1	TRUE	ATCCACCGTACCGTAT-1_contig_2	TRUE	484	TRA	TRAV20*01	None	TRAJ36*01	TRAC*01	TRUE	TRUE	CAVQALSTGANNLFF	TGTGCTGTGCAGGCTCTTTCCACTGGGGCAAACAACCTCTTCTTT	4185	1	clonotype457	clonotype457_consensus_2	single TCR
ATCCACCTCCTTAATC-1	TRUE	ATCCACCTCCTTAATC-1_contig_1	TRUE	601	TRA	TRAV2*01	None	TRAJ26*01	TRAC*01	TRUE	TRUE	CAVPDNYGQNFVF	TGTGCTGTCCCGGATAACTATGGTCAGAATTTTGTCTTT	10462	3	clonotype459	clonotype459_consensus_1	single TCR
ATCCACCTCCTTAATC-1	TRUE	ATCCACCTCCTTAATC-1_contig_2	TRUE	620	TRB	TRBV30*01	None	TRBJ2-3*01	TRBC2*01	TRUE	TRUE	CAWSGPMLGDTQYF	TGTGCCTGGAGTGGCCCCATGTTGGGAGATACGCAGTATTTT	11948	4	clonotype459	clonotype459_consensus_2	single TCR
ATCCGAACAGTAGAGC-1	TRUE	ATCCGAACAGTAGAGC-1_contig_3	TRUE	483	TRB	TRBV10-1*02	TRBD1*01	TRBJ2-4*01	TRBC2*01	TRUE	TRUE	CASSALTIGVQYF	TGCGCCAGCAGTGCTTTAACTATAGGGGTTCAGTACTTC	3087	1	clonotype460	clonotype460_consensus_2	single TCR
ATCCGAACAGTAGAGC-1	TRUE	ATCCGAACAGTAGAGC-1_contig_4	TRUE	619	TRA	TRAV8-4*01	None	TRAJ58*01	TRAC*01	TRUE	TRUE	CAVSITDSGSRLTF	TGTGCTGTGAGTATTACGGACAGTGGCTCTAGGTTGACCTTT	1480	1	clonotype460	clonotype460_consensus_1	single TCR
ATCCGAACAGTATAAG-1	TRUE	ATCCGAACAGTATAAG-1_contig_2	TRUE	651	TRB	TRBV20-1*02	TRBD2*01	TRBJ2-3*01	TRBC2*01	TRUE	TRUE	CSARDPTSGGTDTQYF	TGCAGTGCTAGAGATCCTACTAGCGGGGGCACAGATACGCAGTATTTT	3174	2	clonotype461	clonotype461_consensus_2	single TCR
ATCCGAACAGTATAAG-1	TRUE	ATCCGAACAGTATAAG-1_contig_3	TRUE	670	TRA	TRAV8-6*01	None	TRAJ57*01	TRAC*01	TRUE	TRUE	CAVSAPGGSEKLVF	TGTGCTGTGAGCGCTCCGGGCGGATCTGAAAAGCTGGTCTTT	3088	1	clonotype461	clonotype461_consensus_1	single TCR
ATCGAGTGTCCGAGTC-1	TRUE	ATCGAGTGTCCGAGTC-1_contig_1	TRUE	657	TRB	TRBV4-1*01	TRBD1*01	TRBJ2-1*01	TRBC2*01	TRUE	TRUE	CASSSRGNEQFF	TGCGCCAGCAGTTCCAGGGGGAATGAGCAGTTCTTC	28808	11	clonotype465	clonotype465_consensus_2	single TCR
ATCGAGTGTCCGAGTC-1	TRUE	ATCGAGTGTCCGAGTC-1_contig_2	TRUE	522	TRA	TRAV5*01	None	TRAJ28*01	TRAC*01	TRUE	TRUE	CAERAGSYQLTF	TGTGCGGAGAGGGCTGGGAGTTACCAACTCACTTTC	2993	1	clonotype465	clonotype465_consensus_1	single TCR
ATCTACTCAGATTGCT-1	TRUE	ATCTACTCAGATTGCT-1_contig_1	TRUE	643	TRB	TRBV4-1*01	None	TRBJ2-7*01	TRBC1*01	TRUE	TRUE	CASSQWGSYEQYF	TGCGCCAGCAGCCAATGGGGCTCCTACGAGCAGTACTTC	3154	1	clonotype470	clonotype470_consensus_1	single TCR
ATCTACTCAGATTGCT-1	TRUE	ATCTACTCAGATTGCT-1_contig_3	TRUE	587	TRA	TRAV5*01	None	TRAJ40*01	TRAC*01	TRUE	TRUE	CAESTTSGTYKYIF	TGTGCAGAGAGTACTACCTCAGGAACCTACAAATACATCTTT	7369	5	clonotype470	clonotype470_consensus_2	single TCR
ATCTACTGTCAATGTC-1	TRUE	ATCTACTGTCAATGTC-1_contig_1	TRUE	715	TRB	TRBV6-2*01	None	TRBJ2-7*01	TRBC2*01	TRUE	TRUE	CASTQDPYEQYF	TGTGCCAGCACCCAGGACCCCTACGAGCAGTACTTC	33206	11	clonotype471	clonotype471_consensus_1	single TCR
ATCTACTGTCAATGTC-1	TRUE	ATCTACTGTCAATGTC-1_contig_2	TRUE	585	TRA	TRAV14/DV4*01	None	TRAJ49*01	TRAC*01	TRUE	TRUE	CAMRGWGSGNQFYF	TGTGCAATGAGAGGGTGGGGCAGCGGTAACCAGTTCTATTTT	3563	1	clonotype471	clonotype471_consensus_2	single TCR
ATCTGCCAGAATCTCC-1	TRUE	ATCTGCCAGAATCTCC-1_contig_1	TRUE	715	TRB	TRBV6-1*01	None	TRBJ1-1*01	TRBC1*01	TRUE	TRUE	CASSEGVNTEAFF	TGTGCCAGCAGTGAAGGGGTGAACACTGAAGCTTTCTTT	25991	10	clonotype475	clonotype475_consensus_2	single TCR
ATCTGCCAGAATCTCC-1	TRUE	ATCTGCCAGAATCTCC-1_contig_2	TRUE	553	TRA	TRAV12-1*01	None	TRAJ41*01	TRAC*01	TRUE	TRUE	CVVNFNSGYALNF	TGTGTGGTGAACTTCAATTCCGGGTATGCACTCAACTTC	2193	1	clonotype475	clonotype475_consensus_1	single TCR
ATCTGCCAGCGTGAAC-1	TRUE	ATCTGCCAGCGTGAAC-1_contig_1	TRUE	679	TRB	TRBV12-4*01	None	TRBJ2-2*01	TRBC2*01	TRUE	TRUE	CASSLQYGELFF	TGTGCCAGCAGCCTACAGTATGGGGAGCTGTTTTTT	17024	6	clonotype476	clonotype476_consensus_2	single TCR
ATCTGCCAGCGTGAAC-1	TRUE	ATCTGCCAGCGTGAAC-1_contig_3	TRUE	451	TRA	TRAV10*01	None	TRAJ31*01	TRAC*01	TRUE	TRUE	CVVSNARLMF	TGTGTGGTTTCTAATGCCAGACTCATGTTT	739	1	clonotype476	clonotype476_consensus_1	single TCR
ATGCGATTCAGAAATG-1	TRUE	ATGCGATTCAGAAATG-1_contig_1	TRUE	528	TRB	TRBV4-1*01	TRBD1*01	TRBJ2-3*01	TRBC2*01	TRUE	TRUE	CASSPEGQGTDTQYF	TGCGCCAGCAGCCCAGAGGGACAGGGGACAGATACGCAGTATTTT	4786	3	clonotype487	clonotype487_consensus_2	single TCR
ATGCGATTCAGAAATG-1	TRUE	ATGCGATTCAGAAATG-1_contig_2	TRUE	490	TRA	TRAV20*01	None	TRAJ42*01	TRAC*01	TRUE	TRUE	CAVPGSQGNLIF	TGTGCTGTGCCGGGAAGCCAAGGAAATCTCATCTTT	2928	1	clonotype487	clonotype487_consensus_1	single TCR
ATGGGAGGTCGAATCT-1	TRUE	ATGGGAGGTCGAATCT-1_contig_1	TRUE	472	TRA	TRAV29/DV5*01	None	TRAJ53*01	TRAC*01	TRUE	TRUE	CAASGGGGSNYKLTF	TGTGCAGCAAGCGGGGGGGGAGGTAGCAACTATAAACTGACATTT	321	1	clonotype490	clonotype490_consensus_1	single TCR
ATGGGAGGTCGAATCT-1	TRUE	ATGGGAGGTCGAATCT-1_contig_2	TRUE	514	TRB	TRBV7-2*01	TRBD2*01	TRBJ2-7*01	TRBC2*01	TRUE	TRUE	CASSLVRGLYEQYF	TGTGCCAGCAGCTTAGTGCGGGGTCTCTACGAGCAGTACTTC	3704	2	clonotype490	clonotype490_consensus_2	single TCR
ATGTGTGAGGAGTCTG-1	TRUE	ATGTGTGAGGAGTCTG-1_contig_1	TRUE	693	TRB	TRBV14*01	None	TRBJ1-2*01	TRBC1*01	TRUE	TRUE	CASSQVLGYGYTF	TGTGCCAGCAGCCAAGTTTTGGGCTATGGCTACACCTTC	24602	10	clonotype491	clonotype491_consensus_1	single TCR
ATGTGTGAGGAGTCTG-1	TRUE	ATGTGTGAGGAGTCTG-1_contig_2	TRUE	531	TRA	TRAV27*01	None	TRAJ43*01	TRAC*01	TRUE	TRUE	CAGRSVHNNDMRF	TGTGCAGGCCGTTCAGTTCATAACAATGACATGCGCTTT	11951	3	clonotype491	clonotype491_consensus_2	single TCR
ATGTGTGCAACGATCT-1	TRUE	ATGTGTGCAACGATCT-1_contig_1	TRUE	665	TRB	TRBV4-1*01	TRBD2*01	TRBJ2-3*01	TRBC2*01	TRUE	TRUE	CASSHPLADRTDTQYF	TGCGCCAGCAGCCACCCACTAGCGGACCGCACAGATACGCAGTATTTT	33600	12	clonotype492	clonotype492_consensus_1	single TCR
ATGTGTGCAACGATCT-1	TRUE	ATGTGTGCAACGATCT-1_contig_3	TRUE	303	TRA	TRAV8-2*01	None	TRAJ39*01	TRAC*01	TRUE	TRUE	CVVSASPYNAGNMLTF	TGTGTTGTGAGTGCAAGTCCTTATAATGCAGGCAACATGCTCACCTTT	6354	1	clonotype492	clonotype492_consensus_2	single TCR
ATGTGTGGTGCAACTT-1	TRUE	ATGTGTGGTGCAACTT-1_contig_1	TRUE	540	TRB	TRBV6-1*01	TRBD2*01	TRBJ2-5*01	TRBC2*01	TRUE	TRUE	CASSGRDYPQETQYF	TGTGCCAGCAGTGGAAGGGACTATCCTCAAGAGACCCAGTACTTC	7248	2	clonotype494	clonotype494_consensus_2	single TCR
ATGTGTGGTGCAACTT-1	TRUE	ATGTGTGGTGCAACTT-1_contig_2	TRUE	526	TRA	TRAV27*01	None	TRAJ54*01	TRAC*01	TRUE	TRUE	CAGGPIIQGAQKLVF	TGTGCAGGAGGTCCGATAATTCAGGGAGCCCAGAAGCTGGTATTT	3285	1	clonotype494	clonotype494_consensus_1	single TCR
ATTACTCAGTGTACGG-1	TRUE	ATTACTCAGTGTACGG-1_contig_2	TRUE	446	TRA	TRAV2*01	None	TRAJ21*01	TRAC*01	TRUE	TRUE	CAGFNFNKFYF	TGTGCTGGCTTTAACTTCAACAAATTTTACTTT	4867	1	clonotype496	clonotype496_consensus_1	single TCR
ATTACTCAGTGTACGG-1	TRUE	ATTACTCAGTGTACGG-1_contig_4	TRUE	656	TRB	TRBV27*01	TRBD1*01	TRBJ1-2*01	TRBC1*01	TRUE	TRUE	CASSLSWQGINYGYTF	TGTGCCAGCAGTTTATCTTGGCAGGGGATAAACTATGGCTACACCTTC	2982	1	clonotype496	clonotype496_consensus_2	single TCR
ATTACTCTCCCAACGG-1	TRUE	ATTACTCTCCCAACGG-1_contig_1	TRUE	520	TRB	TRBV7-8*01	TRBD2*02	TRBJ2-3*01	TRBC2*01	TRUE	TRUE	CASSLDLFREGRADTQYF	TGTGCCAGCAGCTTAGATTTATTTCGGGAGGGCCGGGCAGATACGCAGTATTTT	8579	3	clonotype497	clonotype497_consensus_2	single TCR
ATTACTCTCCCAACGG-1	TRUE	ATTACTCTCCCAACGG-1_contig_2	TRUE	549	TRA	TRAV12-2*01	None	TRAJ13*02	TRAC*01	TRUE	TRUE	CAVRAGGYQKVTF	TGTGCCGTGAGGGCTGGGGGTTACCAGAAAGTTACCTTT	6207	2	clonotype497	clonotype497_consensus_1	single TCR
ATTCTACCATGCAACT-1	TRUE	ATTCTACCATGCAACT-1_contig_1	TRUE	697	TRB	TRBV27*01	TRBD1*01	TRBJ1-1*01	TRBC1*01	TRUE	TRUE	CASSFLGTQTEAFF	TGTGCCAGCAGTTTCCTCGGGACACAAACTGAAGCTTTCTTT	6944	3	clonotype500	clonotype500_consensus_2	single TCR
ATTCTACCATGCAACT-1	TRUE	ATTCTACCATGCAACT-1_contig_2	TRUE	449	TRA	TRAV9-2*01	None	TRAJ17*01	TRAC*01	TRUE	TRUE	CALSVEAAGNKLTF	TGTGCTCTGAGCGTCGAAGCTGCAGGCAACAAGCTAACTTTT	3593	1	clonotype500	clonotype500_consensus_1	single TCR
ATTCTACCATTTGCTT-1	TRUE	ATTCTACCATTTGCTT-1_contig_2	TRUE	524	TRB	TRBV20-1*02	TRBD2*01	TRBJ2-5*01	TRBC2*01	TRUE	TRUE	CSARGLQETQYF	TGCAGTGCTAGGGGACTCCAAGAGACCCAGTACTTC	4875	2	clonotype502	clonotype502_consensus_1	single TCR
ATTCTACCATTTGCTT-1	TRUE	ATTCTACCATTTGCTT-1_contig_3	TRUE	448	TRA	TRAV4*01	None	TRAJ40*01	TRAC*01	TRUE	TRUE	CLVEVSGTYKYIF	TGCCTCGTGGAAGTCTCAGGAACCTACAAATACATCTTT	4458	1	clonotype502	clonotype502_consensus_2	single TCR
ATTGGACCACAGGCCT-1	TRUE	ATTGGACCACAGGCCT-1_contig_1	TRUE	680	TRB	TRBV5-1*01	TRBD2*02	TRBJ2-2*01	TRBC2*01	TRUE	TRUE	CASSFEPVGAGELFF	TGCGCCAGCAGCTTCGAACCAGTGGGAGCCGGGGAGCTGTTTTTT	13171	5	clonotype504	clonotype504_consensus_1	single TCR
ATTGGACCACAGGCCT-1	TRUE	ATTGGACCACAGGCCT-1_contig_2	TRUE	538	TRA	TRAV14/DV4*02	None	TRAJ37*01	TRAC*01	TRUE	TRUE	CAMRTPGNTGKLIF	TGTGCAATGAGAACCCCTGGCAACACAGGCAAACTAATCTTT	3860	1	clonotype504	clonotype504_consensus_2	single TCR
ATTGGTGAGGCATTGG-1	TRUE	ATTGGTGAGGCATTGG-1_contig_1	TRUE	529	TRB	TRBV6-5*01	TRBD2*01	TRBJ1-6*01	TRBC1*01	TRUE	TRUE	CASSYKRGAGNSPLHF	TGTGCCAGCAGTTATAAAAGGGGCGCGGGGAATTCACCCCTCCACTTT	13736	6	clonotype4	clonotype4_consensus_1	single TCR
ATTGGTGAGGCATTGG-1	TRUE	ATTGGTGAGGCATTGG-1_contig_2	TRUE	548	TRA	TRAV19*01	None	TRAJ56*01	TRAC*01	TRUE	TRUE	CVTSSGANSKLTF	TGTGTCACTTCCTCTGGAGCCAATAGTAAGCTGACATTT	4053	2	clonotype4	clonotype4_consensus_2	single TCR
ATTGGTGAGGCGATAC-1	TRUE	ATTGGTGAGGCGATAC-1_contig_1	TRUE	541	TRA	TRAV26-1*01	None	TRAJ17*01	TRAC*01	TRUE	TRUE	CIVRVWGAAGNKLTF	TGCATCGTCAGAGTCTGGGGAGCTGCAGGCAACAAGCTAACTTTT	6423	2	clonotype508	clonotype508_consensus_2	single TCR
ATTGGTGAGGCGATAC-1	TRUE	ATTGGTGAGGCGATAC-1_contig_3	TRUE	648	TRB	TRBV19*01	TRBD1*01	TRBJ1-1*01	TRBC1*01	TRUE	TRUE	CASTQGIKSGTEAFF	TGTGCCAGTACCCAGGGGATCAAATCGGGCACTGAAGCTTTCTTT	2481	1	clonotype508	clonotype508_consensus_1	single TCR
ATTGGTGAGTGTCCCG-1	TRUE	ATTGGTGAGTGTCCCG-1_contig_1	TRUE	720	TRB	TRBV6-1*01	TRBD2*02	TRBJ1-4*01	TRBC1*01	TRUE	TRUE	CASSVTGTANEKLFF	TGTGCCAGCAGTGTCACCGGGACAGCTAATGAAAAACTGTTTTTT	12282	4	clonotype509	clonotype509_consensus_1	single TCR
ATTGGTGAGTGTCCCG-1	TRUE	ATTGGTGAGTGTCCCG-1_contig_3	TRUE	496	TRA	TRAV9-2*01	None	TRAJ35*01	TRAC*01	TRUE	TRUE	CALVI	TGTGCTCTCGTAATA	9706	4	clonotype509	clonotype509_consensus_2	single TCR
ATTGGTGTCCGGGTGT-1	TRUE	ATTGGTGTCCGGGTGT-1_contig_1	TRUE	692	TRB	TRBV4-1*01	TRBD1*01	TRBJ2-1*01	TRBC2*01	TRUE	TRUE	CASSQDTRADEQFF	TGCGCCAGCAGCCAAGATACCAGGGCCGATGAGCAGTTCTTC	23782	8	clonotype511	clonotype511_consensus_2	single TCR
ATTGGTGTCCGGGTGT-1	TRUE	ATTGGTGTCCGGGTGT-1_contig_2	TRUE	558	TRA	TRAV17*01	None	TRAJ37*01	TRAC*01	TRUE	TRUE	CATVAFSGNTGKLIF	TGTGCTACGGTCGCTTTCTCTGGCAACACAGGCAAACTAATCTTT	18656	5	clonotype511	clonotype511_consensus_1	single TCR
ATTTCTGAGAGTACAT-1	TRUE	ATTTCTGAGAGTACAT-1_contig_1	TRUE	688	TRB	TRBV7-8*01	TRBD2*01	TRBJ2-7*01	TRBC2*01	TRUE	TRUE	CASSVGTSTYEQYF	TGTGCCAGCAGCGTCGGGACTAGCACCTACGAGCAGTACTTC	7390	3	clonotype513	clonotype513_consensus_2	single TCR
ATTTCTGAGAGTACAT-1	TRUE	ATTTCTGAGAGTACAT-1_contig_3	TRUE	564	TRA	TRAV14/DV4*01	None	TRAJ10*01	TRAC*01	TRUE	TRUE	CAPKGGGGNKLTF	TGTGCACCCAAGGGGGGAGGAGGAAACAAACTCACCTTT	3300	1	clonotype513	clonotype513_consensus_1	single TCR
ATTTCTGAGGCACATG-1	TRUE	ATTTCTGAGGCACATG-1_contig_1	TRUE	692	TRB	TRBV6-6*02	TRBD1*01	TRBJ2-7*01	TRBC2*01	TRUE	TRUE	CASSYMGANEQYF	TGTGCCAGCAGTTACATGGGGGCTAACGAGCAGTACTTC	18995	6	clonotype515	clonotype515_consensus_1	single TCR
ATTTCTGAGGCACATG-1	TRUE	ATTTCTGAGGCACATG-1_contig_2	TRUE	509	TRA	TRAV13-2*01	None	TRAJ13*02	TRAC*01	TRUE	TRUE	CAENISGGYQKVTF	TGTGCAGAGAATATAAGTGGGGGTTACCAGAAAGTTACCTTT	3242	1	clonotype515	clonotype515_consensus_2	single TCR
ATTTCTGCACATCCAA-1	TRUE	ATTTCTGCACATCCAA-1_contig_1	TRUE	504	TRA	TRAV13-2*01	None	TRAJ28*01	TRAC*01	TRUE	TRUE	CAEAYSGAGSYQLTF	TGTGCAGAGGCCTACTCTGGGGCTGGGAGTTACCAACTCACTTTC	4571	2	clonotype517	clonotype517_consensus_2	single TCR
ATTTCTGCACATCCAA-1	TRUE	ATTTCTGCACATCCAA-1_contig_3	TRUE	564	TRB	TRBV5-1*01	TRBD2*01	TRBJ2-1*01	TRBC2*01	TRUE	TRUE	CASSFGGGGPYNEQFF	TGCGCCAGCAGCTTCGGTGGCGGGGGACCCTACAATGAGCAGTTCTTC	10409	3	clonotype517	clonotype517_consensus_1	single TCR
ATTTCTGGTACCGGCT-1	TRUE	ATTTCTGGTACCGGCT-1_contig_1	TRUE	673	TRB	TRBV20-1*02	None	TRBJ2-1*01	TRBC2*01	TRUE	TRUE	CSATSSYNEQFF	TGCAGTGCTACCTCCTCCTACAATGAGCAGTTCTTC	15342	5	clonotype519	clonotype519_consensus_1	single TCR
ATTTCTGGTACCGGCT-1	TRUE	ATTTCTGGTACCGGCT-1_contig_3	TRUE	683	TRA	TRAV8-3*01	None	TRAJ26*01	TRAC*01	TRUE	TRUE	CAVATDNYGQNFVF	TGTGCTGTGGCTACGGATAACTATGGTCAGAATTTTGTCTTT	2760	2	clonotype519	clonotype519_consensus_2	single TCR
ATTTCTGGTCCGACGT-1	TRUE	ATTTCTGGTCCGACGT-1_contig_1	TRUE	540	TRB	TRBV6-1*01	TRBD2*01	TRBJ2-4*01	TRBC2*01	TRUE	TRUE	CASRVPRGIQYF	TGTGCCAGCAGGGTCCCCCGTGGCATTCAGTACTTC	7658	2	clonotype520	clonotype520_consensus_1	single TCR
ATTTCTGGTCCGACGT-1	TRUE	ATTTCTGGTCCGACGT-1_contig_3	TRUE	568	TRA	TRAV16*01	None	TRAJ54*01	TRAC*01	TRUE	TRUE	CALGEGEIQGAQKLVF	TGTGCTCTAGGGGAGGGCGAGATTCAGGGAGCCCAGAAGCTGGTATTT	3821	1	clonotype520	clonotype520_consensus_2	single TCR
CAACCTCCAAAGGCGT-1	TRUE	CAACCTCCAAAGGCGT-1_contig_1	TRUE	662	TRB	TRBV15*01	TRBD1*01	TRBJ2-2*01	TRBC2*01	TRUE	TRUE	CATRQGAGGELFF	TGTGCCACCCGGCAGGGGGCTGGCGGGGAGCTGTTTTTT	7749	2	clonotype525	clonotype525_consensus_2	single TCR
CAACCTCCAAAGGCGT-1	TRUE	CAACCTCCAAAGGCGT-1_contig_3	TRUE	581	TRA	TRAV1-2*01	None	TRAJ12*01	TRAC*01	TRUE	TRUE	CAVYMDSSYKLIF	TGTGCTGTGTATATGGATAGCAGCTATAAATTGATCTTC	6512	2	clonotype525	clonotype525_consensus_1	single TCR
CAACCTCCATGGGACA-1	TRUE	CAACCTCCATGGGACA-1_contig_1	TRUE	648	TRB	TRBV27*01	TRBD1*01	TRBJ2-3*01	TRBC2*01	TRUE	TRUE	CASATKKGTTQYF	TGTGCCAGCGCAACTAAAAAGGGGACGACGCAGTATTTT	17356	5	clonotype526	clonotype526_consensus_2	single TCR
CAACCTCCATGGGACA-1	TRUE	CAACCTCCATGGGACA-1_contig_2	TRUE	643	TRA	TRAV20*01	None	TRAJ53*01	TRAC*01	TRUE	TRUE	CAVQGGSGGSNYKLTF	TGTGCTGTGCAGGGGGGTAGTGGAGGTAGCAACTATAAACTGACATTT	7526	2	clonotype526	clonotype526_consensus_1	single TCR
CAACTAGTCTGGTGTA-1	TRUE	CAACTAGTCTGGTGTA-1_contig_1	TRUE	721	TRB	TRBV20-1*02	TRBD2*02	TRBJ1-5*01	TRBC1*01	TRUE	TRUE	CSAGLNGGNQPQHF	TGCAGTGCTGGATTAAATGGGGGCAATCAGCCCCAGCATTTT	22743	10	clonotype531	clonotype531_consensus_2	single TCR
CAACTAGTCTGGTGTA-1	TRUE	CAACTAGTCTGGTGTA-1_contig_2	TRUE	558	TRA	TRAV12-3*01	None	TRAJ52*01	TRAC*01	TRUE	TRUE	CAMKSGTSYGKLTF	TGTGCAATGAAAAGTGGTACTAGCTATGGAAAGCTGACATTT	10767	3	clonotype531	clonotype531_consensus_1	single TCR
CAAGAAAAGTGTGGCA-1	TRUE	CAAGAAAAGTGTGGCA-1_contig_1	TRUE	692	TRA	TRAV24*01	None	TRAJ48*01	TRAC*01	TRUE	TRUE	CASSSNFGNEKLTF	TGTGCCTCCTCCTCTAACTTTGGAAATGAGAAATTAACCTTT	11924	3	clonotype533	clonotype533_consensus_2	single TCR
CAAGAAAAGTGTGGCA-1	TRUE	CAAGAAAAGTGTGGCA-1_contig_2	TRUE	711	TRB	TRBV9*01	TRBD1*01	TRBJ1-2*01	TRBC1*01	TRUE	TRUE	CASSVAYTGVGYTF	TGTGCCAGCAGCGTAGCTTATACAGGGGTAGGCTACACCTTC	17000	5	clonotype533	clonotype533_consensus_1	single TCR
CAAGATCGTCTTGCGG-1	TRUE	CAAGATCGTCTTGCGG-1_contig_1	TRUE	656	TRB	TRBV4-1*01	TRBD2*01	TRBJ1-2*01	TRBC1*01	TRUE	TRUE	CASSQDPGNGYTF	TGCGCCAGCAGCCAAGACCCGGGGAATGGCTACACCTTC	16526	6	clonotype539	clonotype539_consensus_2	single TCR
CAAGATCGTCTTGCGG-1	TRUE	CAAGATCGTCTTGCGG-1_contig_3	TRUE	552	TRA	TRAV25*01	None	TRAJ40*01	TRAC*01	TRUE	TRUE	CAGLGKGTYKYIF	TGTGCAGGGCTTGGGAAAGGAACCTACAAATACATCTTT	3310	1	clonotype539	clonotype539_consensus_1	single TCR
CAAGATCGTGAGGCTA-1	TRUE	CAAGATCGTGAGGCTA-1_contig_1	TRUE	655	TRB	TRBV10-3*01	TRBD2*01	TRBJ2-5*01	TRBC2*01	TRUE	TRUE	CAISEVVGTETQYF	TGTGCCATCAGTGAAGTAGTGGGTACGGAGACCCAGTACTTC	6659	3	clonotype540	clonotype540_consensus_1	single TCR
CAAGATCGTGAGGCTA-1	TRUE	CAAGATCGTGAGGCTA-1_contig_3	TRUE	548	TRA	TRAV13-2*01	None	TRAJ17*01	TRAC*01	TRUE	TRUE	CAENMIKAAGNKLTF	TGTGCAGAGAATATGATCAAAGCTGCAGGCAACAAGCTAACTTTT	8600	2	clonotype540	clonotype540_consensus_2	single TCR
CAAGATCGTTCGCGAC-1	TRUE	CAAGATCGTTCGCGAC-1_contig_1	TRUE	682	TRB	TRBV5-1*01	TRBD2*01	TRBJ2-7*01	TRBC2*01	TRUE	TRUE	CASSTGLAGIASYEQYF	TGCGCCAGCAGCACCGGACTAGCGGGTATCGCGTCCTACGAGCAGTACTTC	19260	6	clonotype541	clonotype541_consensus_1	single TCR
CAAGATCGTTCGCGAC-1	TRUE	CAAGATCGTTCGCGAC-1_contig_2	TRUE	535	TRA	TRAV17*01	None	TRAJ37*01	TRAC*01	TRUE	TRUE	CATDAGSGNTGKLIF	TGTGCTACGGACGCGGGCTCTGGCAACACAGGCAAACTAATCTTT	3490	1	clonotype541	clonotype541_consensus_2	single TCR
CAAGATCTCAACGGCC-1	TRUE	CAAGATCTCAACGGCC-1_contig_1	TRUE	756	TRB	TRBV4-2*01	TRBD1*01	TRBJ1-1*01	TRBC1*01	TRUE	TRUE	CASSREPGQGAQGVTEAFF	TGTGCCAGCAGCCGGGAACCGGGACAGGGGGCGCAGGGGGTCACTGAAGCTTTCTTT	21664	8	clonotype542	clonotype542_consensus_2	single TCR
CAAGATCTCAACGGCC-1	TRUE	CAAGATCTCAACGGCC-1_contig_3	TRUE	525	TRA	TRAV1-2*01	None	TRAJ9*01	TRAC*01	TRUE	TRUE	CAVWTGGFKTIF	TGTGCTGTGTGGACTGGAGGCTTCAAAACTATCTTT	3063	1	clonotype542	clonotype542_consensus_1	single TCR
CAAGGCCCAAGACACG-1	TRUE	CAAGGCCCAAGACACG-1_contig_1	TRUE	514	TRB	TRBV20-1*02	TRBD1*01	TRBJ2-7*01	TRBC2*01	TRUE	TRUE	CSGEGADSSYEQYF	TGCAGTGGAGAAGGAGCGGACAGCTCCTACGAGCAGTACTTC	7026	2	clonotype544	clonotype544_consensus_1	single TCR
CAAGGCCCAAGACACG-1	TRUE	CAAGGCCCAAGACACG-1_contig_2	TRUE	567	TRA	TRAV12-2*01	None	TRAJ53*01	TRAC*01	TRUE	TRUE	CAVTKNSGGSNYKLTF	TGTGCCGTGACGAAGAATAGTGGAGGTAGCAACTATAAACTGACATTT	5510	3	clonotype544	clonotype544_consensus_2	single TCR
CAAGGCCCACCATGTA-1	TRUE	CAAGGCCCACCATGTA-1_contig_1	TRUE	873	TRB	TRBV5-4*01	TRBD2*02	TRBJ2-7*01	TRBC1*01	TRUE	TRUE	CASSLEAGAYEQYF	TGTGCCAGCAGCTTGGAGGCGGGAGCCTACGAGCAGTACTTC	5143	2	clonotype545	clonotype545_consensus_2	single TCR
CAAGGCCCACCATGTA-1	TRUE	CAAGGCCCACCATGTA-1_contig_2	TRUE	455	TRA	TRAV39*01	None	TRAJ41*01	TRAC*01	TRUE	TRUE	CAVDIRNSGYALNF	TGTGCCGTGGACATTAGGAATTCCGGGTATGCACTCAACTTC	1744	1	clonotype545	clonotype545_consensus_1	single TCR
CAAGTTGCAAATTGCC-1	TRUE	CAAGTTGCAAATTGCC-1_contig_1	TRUE	490	TRA	TRAV10*01	None	TRAJ26*01	TRAC*01	TRUE	TRUE	CVVSVDNYGQNFVF	TGTGTGGTGAGCGTTGATAACTATGGTCAGAATTTTGTCTTT	4868	1	clonotype548	clonotype548_consensus_1	single TCR
CAAGTTGCAAATTGCC-1	TRUE	CAAGTTGCAAATTGCC-1_contig_2	TRUE	464	TRB	TRBV28*01	None	TRBJ2-7*01	TRBC2*01	TRUE	TRUE	CASRGPIYEQYF	TGTGCCAGCAGAGGTCCAATCTACGAGCAGTACTTC	7433	2	clonotype548	clonotype548_consensus_2	single TCR
CAAGTTGTCCCAAGTA-1	TRUE	CAAGTTGTCCCAAGTA-1_contig_1	TRUE	683	TRB	TRBV7-9*01	None	TRBJ1-1*01	TRBC1*01	TRUE	TRUE	CASSLGQLNTEAFF	TGTGCCAGCAGCTTAGGGCAGCTGAACACTGAAGCTTTCTTT	10560	3	clonotype549	clonotype549_consensus_2	single TCR
CAAGTTGTCCCAAGTA-1	TRUE	CAAGTTGTCCCAAGTA-1_contig_3	TRUE	493	TRA	TRAV38-2/DV8*01	None	TRAJ41*01	TRAC*01	TRUE	TRUE	CAYHNSGYALNF	TGTGCTTATCATAATTCCGGGTATGCACTCAACTTC	2792	1	clonotype549	clonotype549_consensus_1	single TCR
CACAAACCATTCCTCG-1	TRUE	CACAAACCATTCCTCG-1_contig_1	TRUE	786	TRB	TRBV5-1*01	TRBD2*02	TRBJ2-1*01	TRBC2*01	TRUE	TRUE	CASSLYLAGGYNEQFF	TGCGCCAGCAGCTTGTACCTAGCGGGAGGTTACAATGAGCAGTTCTTC	13155	5	clonotype553	clonotype553_consensus_1	single TCR
CACAAACCATTCCTCG-1	TRUE	CACAAACCATTCCTCG-1_contig_2	TRUE	508	TRA	TRAV12-1*01	None	TRAJ24*02	TRAC*01	TRUE	TRUE	CVVTPGTDSWGKLQF	TGTGTGGTGACCCCAGGAACTGACAGCTGGGGGAAATTGCAGTTT	4281	1	clonotype553	clonotype553_consensus_2	single TCR
CACAAACTCCAGTATG-1	TRUE	CACAAACTCCAGTATG-1_contig_1	TRUE	443	TRA	TRAV21*01	None	TRAJ49*01	TRAC*01	TRUE	TRUE	CAVDTGNQFYF	TGTGCTGTCGACACCGGTAACCAGTTCTATTTT	4783	1	clonotype555	clonotype555_consensus_2	single TCR
CACAAACTCCAGTATG-1	TRUE	CACAAACTCCAGTATG-1_contig_2	TRUE	650	TRB	TRBV6-4*02	TRBD1*01	TRBJ1-2*01	TRBC1*01	TRUE	TRUE	CASSPTGPLGYTF	TGTGCCAGCAGTCCGACAGGGCCCTTGGGCTACACCTTC	3766	1	clonotype555	clonotype555_consensus_1	single TCR
CACAAACTCCTACAGA-1	TRUE	CACAAACTCCTACAGA-1_contig_1	TRUE	740	TRA	TRAV12-1*01	None	TRAJ47*02	TRAC*01	TRUE	TRUE	CVVHPGGNKLVF	TGTGTGGTGCACCCAGGAGGAAACAAGCTGGTCTTT	6601	3	clonotype556	clonotype556_consensus_2	single TCR
CACAAACTCCTACAGA-1	TRUE	CACAAACTCCTACAGA-1_contig_4	TRUE	785	TRB	TRBV30*01	None	TRBJ1-1*01	TRBC1*01	TRUE	TRUE	CAWSRHDFTEAFF	TGTGCCTGGTCTCGCCATGACTTCACTGAAGCTTTCTTT	3099	1	clonotype556	clonotype556_consensus_1	single TCR
CACACAATCTTGTACT-1	TRUE	CACACAATCTTGTACT-1_contig_2	TRUE	679	TRB	TRBV27*01	None	TRBJ1-1*01	TRBC1*01	TRUE	TRUE	CASSLTSDTEAFF	TGTGCCAGCAGTTTAACTTCGGACACTGAAGCTTTCTTT	4067	1	clonotype559	clonotype559_consensus_2	single TCR
CACACAATCTTGTACT-1	TRUE	CACACAATCTTGTACT-1_contig_3	TRUE	345	TRA	TRAV36/DV7*01	None	TRAJ21*01	TRAC*01	TRUE	TRUE	CAPRGYNFNKFYF	TGTGCTCCAAGAGGGTACAACTTCAACAAATTTTACTTT	654	1	clonotype559	clonotype559_consensus_1	single TCR
CACACCTAGGTGGGTT-1	TRUE	CACACCTAGGTGGGTT-1_contig_1	TRUE	686	TRB	TRBV2*01	TRBD2*02	TRBJ2-5*01	TRBC2*01	TRUE	TRUE	CASSSGLAGGPGETQYF	TGTGCCAGCAGTTCTGGACTAGCGGGAGGGCCAGGAGAGACCCAGTACTTC	7361	2	clonotype560	clonotype560_consensus_1	single TCR
CACACCTAGGTGGGTT-1	TRUE	CACACCTAGGTGGGTT-1_contig_3	TRUE	511	TRA	TRAV35*01	None	TRAJ54*01	TRAC*01	TRUE	TRUE	CAGQGWGAQKLVF	TGTGCTGGGCAGGGGTGGGGAGCCCAGAAGCTGGTATTT	347	1	clonotype560	clonotype560_consensus_2	single TCR
CACACCTTCGATAGAA-1	TRUE	CACACCTTCGATAGAA-1_contig_1	TRUE	762	TRB	TRBV5-5*01	None	TRBJ2-7*01	TRBC2*01	TRUE	TRUE	CASSVDFYEQYF	TGTGCCAGCAGTGTGGACTTCTACGAGCAGTACTTC	4957	2	clonotype563	clonotype563_consensus_2	single TCR
CACACCTTCGATAGAA-1	TRUE	CACACCTTCGATAGAA-1_contig_2	TRUE	458	TRA	TRAV4*01	None	TRAJ40*01	TRAC*01	TRUE	TRUE	CLVGDSGASGTYKYIF	TGCCTCGTGGGTGACTCTGGGGCCTCAGGAACCTACAAATACATCTTT	1724	1	clonotype563	clonotype563_consensus_1	single TCR
CACAGGCAGCTGAAAT-1	TRUE	CACAGGCAGCTGAAAT-1_contig_1	TRUE	666	TRB	TRBV4-1*01	TRBD2*01	TRBJ1-5*01	TRBC1*01	TRUE	TRUE	CASSQVFGVGQPQHF	TGCGCCAGCAGCCAAGTATTCGGGGTGGGGCAGCCCCAGCATTTT	12408	4	clonotype567	clonotype567_consensus_2	single TCR
CACAGGCAGCTGAAAT-1	TRUE	CACAGGCAGCTGAAAT-1_contig_3	TRUE	488	TRA	TRAV21*01	None	TRAJ37*01	TRAC*01	TRUE	TRUE	CAVRPGDYTGKLIF	TGTGCTGTGAGGCCGGGAGACTACACAGGCAAACTAATCTTT	1027	2	clonotype567	clonotype567_consensus_1	single TCR
CACAGGCGTTGCGTTA-1	TRUE	CACAGGCGTTGCGTTA-1_contig_1	TRUE	682	TRB	TRBV11-2*03	None	TRBJ2-3*01	TRBC2*01	TRUE	TRUE	CASSLTPPDTQYF	TGTGCCAGCAGCCTTACCCCCCCGGATACGCAGTATTTT	12494	4	clonotype1	clonotype1_consensus_1	single TCR
CACAGGCGTTGCGTTA-1	TRUE	CACAGGCGTTGCGTTA-1_contig_3	TRUE	477	TRA	TRAV8-2*01	None	TRAJ31*01	TRAC*01	TRUE	TRUE	CVVSFRNNNARLMF	TGTGTTGTGAGCTTTCGGAATAACAATGCCAGACTCATGTTT	3485	1	clonotype1	clonotype1_consensus_2	single TCR
CACAGTAAGGGTGTGT-1	TRUE	CACAGTAAGGGTGTGT-1_contig_1	TRUE	607	TRB	TRBV4-1*01	None	TRBJ1-1*01	TRBC1*01	TRUE	TRUE	CASSQGAANMNTEAFF	TGCGCCAGCAGCCAAGGGGCAGCAAATATGAACACTGAAGCTTTCTTT	12052	5	clonotype571	clonotype571_consensus_2	single TCR
CACAGTAAGGGTGTGT-1	TRUE	CACAGTAAGGGTGTGT-1_contig_2	TRUE	941	TRA	TRAV1-2*01	None	TRAJ7*01	TRAC*01	TRUE	TRUE	CAVWGNNRLAF	TGTGCTGTGTGGGGGAACAACAGACTCGCTTTT	7871	3	clonotype571	clonotype571_consensus_1	single TCR
CACAGTACACACATGT-1	TRUE	CACAGTACACACATGT-1_contig_1	TRUE	687	TRB	TRBV12-3*01	TRBD2*01	TRBJ2-1*01	TRBC2*01	TRUE	TRUE	CASSSGTSGINEQFF	TGTGCCAGCAGCTCCGGGACTAGCGGCATCAATGAGCAGTTCTTC	4229	2	clonotype572	clonotype572_consensus_2	single TCR
CACAGTACACACATGT-1	TRUE	CACAGTACACACATGT-1_contig_2	TRUE	437	TRA	TRAV35*01	None	TRAJ42*01	TRAC*01	TRUE	TRUE	CAGRTYGGSQGNLIF	TGTGCTGGGCGTACTTATGGAGGAAGCCAAGGAAATCTCATCTTT	4389	1	clonotype572	clonotype572_consensus_1	single TCR
CACAGTAGTGGCTCCA-1	TRUE	CACAGTAGTGGCTCCA-1_contig_3	TRUE	802	TRB	TRBV6-6*01	TRBD2*02	TRBJ2-7*01	TRBC2*01	TRUE	TRUE	CASAQTSGRASEQYF	TGTGCCAGCGCCCAGACTAGCGGGAGGGCCAGCGAGCAGTACTTC	15177	6	clonotype573	clonotype573_consensus_2	single TCR
CACAGTAGTGGCTCCA-1	TRUE	CACAGTAGTGGCTCCA-1_contig_4	TRUE	653	TRA	TRAV13-1*01	None	TRAJ26*01	TRAC*01	TRUE	TRUE	CAAIPDYGQNFVF	TGTGCAGCAATTCCCGACTATGGTCAGAATTTTGTCTTT	4458	1	clonotype573	clonotype573_consensus_1	single TCR
CACAGTATCACTTACT-1	TRUE	CACAGTATCACTTACT-1_contig_1	TRUE	668	TRB	TRBV9*02	None	TRBJ2-1*01	TRBC1*01	TRUE	TRUE	CASSAFGDEQFF	TGTGCCAGCAGCGCCTTCGGAGATGAGCAGTTCTTC	12977	5	clonotype575	clonotype575_consensus_2	single TCR
CACAGTATCACTTACT-1	TRUE	CACAGTATCACTTACT-1_contig_2	TRUE	556	TRA	TRAV23/DV6*01	None	TRAJ30*01	TRAC*01	TRUE	TRUE	CAASMMNRDDKIIF	TGTGCAGCAAGCATGATGAACAGAGATGACAAGATCATCTTT	2775	1	clonotype575	clonotype575_consensus_1	single TCR
CACAGTATCATTCACT-1	TRUE	CACAGTATCATTCACT-1_contig_1	TRUE	538	TRB	TRBV4-1*01	TRBD1*01	TRBJ2-5*01	TRBC2*01	TRUE	TRUE	CASSQDLLQGIQETQYF	TGCGCCAGCAGCCAAGATCTCCTGCAGGGCATACAAGAGACCCAGTACTTC	8195	6	clonotype577	clonotype577_consensus_1	single TCR
CACAGTATCATTCACT-1	TRUE	CACAGTATCATTCACT-1_contig_2	TRUE	455	TRA	TRAV2*01	None	TRAJ13*02	TRAC*01	TRUE	TRUE	CAGDFSGGYQKVTF	TGTGCTGGGGACTTTTCTGGGGGTTACCAGAAAGTTACCTTT	3149	2	clonotype577	clonotype577_consensus_2	single TCR
CACAGTATCCCATTTA-1	TRUE	CACAGTATCCCATTTA-1_contig_1	TRUE	677	TRB	TRBV9*02	TRBD1*01	TRBJ1-2*01	TRBC1*01	TRUE	TRUE	CASSVEGQGYGYTF	TGTGCCAGCAGCGTAGAAGGACAGGGCTATGGCTACACCTTC	10174	3	clonotype578	clonotype578_consensus_2	single TCR
CACAGTATCCCATTTA-1	TRUE	CACAGTATCCCATTTA-1_contig_3	TRUE	616	TRA	TRAV12-1*01	None	TRAJ30*01	TRAC*01	TRUE	TRUE	CVVLSWRDDKIIF	TGTGTGGTGCTGTCGTGGAGAGATGACAAGATCATCTTT	7292	2	clonotype578	clonotype578_consensus_1	single TCR
CACATAGGTTACGCGC-1	TRUE	CACATAGGTTACGCGC-1_contig_1	TRUE	591	TRA	TRAV41*01	None	TRAJ35*01	TRAC*01	TRUE	TRUE	CAVIGFGNVLHC	TGTGCTGTCATAGGCTTTGGGAATGTGCTGCATTGC	2933	1	clonotype581	clonotype581_consensus_2	single TCR
CACATAGGTTACGCGC-1	TRUE	CACATAGGTTACGCGC-1_contig_2	TRUE	691	TRB	TRBV7-3*01	TRBD2*01	TRBJ2-3*01	TRBC2*01	TRUE	TRUE	CASSWTSGSTDTQYF	TGTGCCAGCAGCTGGACTAGCGGGAGCACAGATACGCAGTATTTT	14134	4	clonotype581	clonotype581_consensus_1	single TCR
CACATTTAGGCCCTCA-1	TRUE	CACATTTAGGCCCTCA-1_contig_1	TRUE	675	TRB	TRBV7-9*01	None	TRBJ1-2*01	TRBC1*01	TRUE	TRUE	CASSSANYGYTF	TGTGCCAGCAGCTCAGCTAACTATGGCTACACCTTC	12390	4	clonotype584	clonotype584_consensus_1	single TCR
CACATTTAGGCCCTCA-1	TRUE	CACATTTAGGCCCTCA-1_contig_3	TRUE	676	TRA	TRAV8-3*01	None	TRAJ43*01	TRAC*01	TRUE	TRUE	CAVGNNDMRF	TGTGCTGTGGGCAACAATGACATGCGCTTT	5659	2	clonotype584	clonotype584_consensus_2	single TCR
CACATTTTCCAGTATG-1	TRUE	CACATTTTCCAGTATG-1_contig_1	TRUE	916	TRA	TRAV8-4*01	None	TRAJ52*01	TRAC*01	TRUE	TRUE	CAVSVNAGGTSYGKLTF	TGTGCTGTGAGTGTTAATGCTGGTGGTACTAGCTATGGAAAGCTGACATTT	5600	2	clonotype585	clonotype585_consensus_2	single TCR
CACATTTTCCAGTATG-1	TRUE	CACATTTTCCAGTATG-1_contig_3	TRUE	500	TRB	TRBV24-1*01	TRBD2*02	TRBJ2-1*01	TRBC2*01	TRUE	TRUE	CATSDSGRSSGSNEQFF	TGTGCCACCAGTGACTCAGGCCGTTCTAGCGGGAGCAATGAGCAGTTCTTC	9757	3	clonotype585	clonotype585_consensus_1	single TCR
CACCACTTCTCTAAGG-1	TRUE	CACCACTTCTCTAAGG-1_contig_1	TRUE	676	TRB	TRBV7-2*01	None	TRBJ1-5*01	TRBC1*01	TRUE	TRUE	CASSLNSNQPQHF	TGTGCCAGCAGCCTAAATAGCAATCAGCCCCAGCATTTT	7262	3	clonotype587	clonotype587_consensus_1	single TCR
CACCACTTCTCTAAGG-1	TRUE	CACCACTTCTCTAAGG-1_contig_3	TRUE	516	TRA	TRAV20*01	None	TRAJ58*01	TRAC*01	TRUE	TRUE	CAVPLGRSSGSRLTF	TGTGCTGTGCCCTTAGGAAGGTCCAGTGGCTCTAGGTTGACCTTT	487	1	clonotype587	clonotype587_consensus_2	single TCR
CACCACTTCTTAACCT-1	TRUE	CACCACTTCTTAACCT-1_contig_2	TRUE	1052	TRB	TRBV15*01	None	TRBJ2-3*01	TRBC2*01	TRUE	TRUE	CATSRDPADTQYF	TGTGCCACCAGCAGAGATCCCGCAGATACGCAGTATTTT	4517	2	clonotype588	clonotype588_consensus_1	single TCR
CACCACTTCTTAACCT-1	TRUE	CACCACTTCTTAACCT-1_contig_3	TRUE	579	TRA	TRAV29/DV5*01	None	TRAJ47*02	TRAC*01	TRUE	TRUE	CAASAVENGNKLVF	TGTGCAGCAAGCGCGGTTGAAAATGGAAACAAGCTGGTCTTT	2995	1	clonotype588	clonotype588_consensus_2	single TCR
CACCAGGAGTGGTCCC-1	TRUE	CACCAGGAGTGGTCCC-1_contig_1	TRUE	656	TRB	TRBV16*01	None	TRBJ1-2*01	TRBC1*01	TRUE	TRUE	CASSLGSYGYTF	TGTGCCAGCAGCCTCGGGTCCTATGGCTACACCTTC	2865	1	clonotype589	clonotype589_consensus_1	single TCR
CACCAGGAGTGGTCCC-1	TRUE	CACCAGGAGTGGTCCC-1_contig_3	TRUE	484	TRA	TRAV21*01	None	TRAJ48*01	TRAC*01	TRUE	TRUE	CAVYNFGNEKLTF	TGTGCTGTATATAACTTTGGAAATGAGAAATTAACCTTT	9292	2	clonotype589	clonotype589_consensus_2	single TCR
CACCAGGTCAGGTAAA-1	TRUE	CACCAGGTCAGGTAAA-1_contig_1	TRUE	691	TRB	TRBV12-3*01	TRBD1*01	TRBJ1-1*01	TRBC1*01	TRUE	TRUE	CASSPGVQGTKRAAFF	TGTGCCAGCAGCCCAGGGGTCCAAGGGACAAAACGTGCTGCTTTCTTT	23838	8	clonotype591	clonotype591_consensus_2	single TCR
CACCAGGTCAGGTAAA-1	TRUE	CACCAGGTCAGGTAAA-1_contig_2	TRUE	566	TRA	TRAV19*01	None	TRAJ36*01	TRAC*01	TRUE	TRUE	CALLVAGANNLFF	TGTGCTCTGTTAGTGGCTGGGGCAAACAACCTCTTCTTT	7867	3	clonotype591	clonotype591_consensus_1	single TCR
CACCTTGCAAGTCATC-1	TRUE	CACCTTGCAAGTCATC-1_contig_1	TRUE	691	TRB	TRBV12-5*01	TRBD2*02	TRBJ1-1*01	TRBC1*01	TRUE	TRUE	CASGLWDGEAFF	TGTGCTAGTGGTTTGTGGGATGGTGAAGCTTTCTTT	18960	7	clonotype592	clonotype592_consensus_2	single TCR
CACCTTGCAAGTCATC-1	TRUE	CACCTTGCAAGTCATC-1_contig_3	TRUE	548	TRA	TRAV12-2*01	None	TRAJ6*01	TRAC*01	TRUE	TRUE	CAVNKGGSYIPTF	TGTGCCGTGAACAAAGGAGGAAGCTACATACCTACATTT	7859	2	clonotype592	clonotype592_consensus_1	single TCR
CACTCCATCCTCATTA-1	TRUE	CACTCCATCCTCATTA-1_contig_1	TRUE	508	TRB	TRBV7-3*01	TRBD2*01	TRBJ2-5*01	TRBC2*01	TRUE	TRUE	CASSPGTSRGETQYF	TGTGCCAGCAGCCCCGGGACTTCCCGCGGGGAGACCCAGTACTTC	3472	2	clonotype598	clonotype598_consensus_1	single TCR
CACTCCATCCTCATTA-1	TRUE	CACTCCATCCTCATTA-1_contig_2	TRUE	511	TRA	TRAV27*01	None	TRAJ49*01	TRAC*01	TRUE	TRUE	CAGSGNQFYF	TGTGCAGGATCCGGTAACCAGTTCTATTTT	3339	1	clonotype598	clonotype598_consensus_2	single TCR
CAGAATCCATAAGACA-1	TRUE	CAGAATCCATAAGACA-1_contig_1	TRUE	618	TRA	TRAV12-1*01	None	TRAJ33*01	TRAC*01	TRUE	TRUE	CVVNGGNYQLIW	TGTGTGGTGAACGGGGGCAACTATCAGTTAATCTGG	13606	4	clonotype601	clonotype601_consensus_2	single TCR
CAGAATCCATAAGACA-1	TRUE	CAGAATCCATAAGACA-1_contig_2	TRUE	532	TRB	TRBV11-2*03	None	TRBJ2-5*01	TRBC2*01	TRUE	TRUE	CASSLYGSFETQYF	TGTGCCAGCAGCTTATACGGTAGCTTCGAGACCCAGTACTTC	7063	2	clonotype601	clonotype601_consensus_1	single TCR
CAGAATCTCGAGAACG-1	TRUE	CAGAATCTCGAGAACG-1_contig_1	TRUE	702	TRB	TRBV6-5*01	TRBD2*02	TRBJ2-3*01	TRBC1*01	TRUE	TRUE	CASSLRGSPSTDTQYF	TGTGCCAGCAGTCTCAGAGGGAGCCCGAGCACAGATACGCAGTATTTT	9629	3	clonotype602	clonotype602_consensus_2	single TCR
CAGAATCTCGAGAACG-1	TRUE	CAGAATCTCGAGAACG-1_contig_4	TRUE	603	TRA	TRAV26-1*01	None	TRAJ44*01	TRAC*01	TRUE	TRUE	CIGHEYTGTASKLTF	TGCATCGGGCACGAATATACCGGCACTGCCAGTAAACTCACCTTT	6143	2	clonotype602	clonotype602_consensus_1	single TCR
CAGAATCTCTAACGGT-1	TRUE	CAGAATCTCTAACGGT-1_contig_1	TRUE	496	TRA	TRAV9-2*01	None	TRAJ37*01	TRAC*01	TRUE	TRUE	CALYRSGNTGKLIF	TGTGCTCTCTACCGCTCTGGCAACACAGGCAAACTAATCTTT	14129	3	clonotype603	clonotype603_consensus_2	single TCR
CAGAATCTCTAACGGT-1	TRUE	CAGAATCTCTAACGGT-1_contig_2	TRUE	652	TRB	TRBV28*01	TRBD2*02	TRBJ2-2*01	TRBC2*01	TRUE	TRUE	CASSLWTSGIATGELFF	TGTGCCAGCAGTTTATGGACTAGCGGGATAGCCACCGGGGAGCTGTTTTTT	6692	2	clonotype603	clonotype603_consensus_1	single TCR
CAGAGAGAGACGACGT-1	TRUE	CAGAGAGAGACGACGT-1_contig_2	TRUE	502	TRA	TRAV6*01	None	TRAJ11*01	TRAC*01	TRUE	TRUE	CALGGYSTLTF	TGTGCTCTAGGAGGATACAGCACCCTCACCTTT	2707	1	clonotype604	clonotype604_consensus_1	single TCR
CAGAGAGAGACGACGT-1	TRUE	CAGAGAGAGACGACGT-1_contig_3	TRUE	672	TRB	TRBV4-1*01	TRBD2*01	TRBJ2-1*01	TRBC2*01	TRUE	TRUE	CASSQEPHGGGAVEQFF	TGCGCCAGCAGCCAAGAGCCCCATGGCGGGGGGGCCGTTGAGCAGTTCTTC	18026	6	clonotype604	clonotype604_consensus_2	single TCR
CAGCAGCCACCACGTG-1	TRUE	CAGCAGCCACCACGTG-1_contig_1	TRUE	494	TRA	TRAV38-1*01	None	TRAJ27*01	TRAC*01	TRUE	TRUE	CAFMPYNTNAGKSTF	TGTGCTTTCATGCCCTATAACACCAATGCAGGCAAATCAACCTTT	2280	1	clonotype608	clonotype608_consensus_2	single TCR
CAGCAGCCACCACGTG-1	TRUE	CAGCAGCCACCACGTG-1_contig_2	TRUE	831	TRB	TRBV5-6*01	TRBD1*01	TRBJ2-7*01	TRBC2*01	TRUE	TRUE	CASSLERTYEQYF	TGTGCCAGCAGCTTAGAAAGGACCTACGAGCAGTACTTC	16983	5	clonotype608	clonotype608_consensus_1	single TCR
CAGCAGCTCCTGCTTG-1	TRUE	CAGCAGCTCCTGCTTG-1_contig_1	TRUE	510	TRB	TRBV12-4*01	None	TRBJ1-2*01	TRBC1*01	TRUE	TRUE	CASSFPNHATGYTF	TGTGCCAGCAGTTTCCCAAACCACGCCACGGGCTACACCTTC	9669	3	clonotype609	clonotype609_consensus_2	single TCR
CAGCAGCTCCTGCTTG-1	TRUE	CAGCAGCTCCTGCTTG-1_contig_2	TRUE	551	TRA	TRAV9-2*01	None	TRAJ27*01	TRAC*01	TRUE	TRUE	CALSTNAGKSTF	TGTGCTCTCTCCACCAATGCAGGCAAATCAACCTTT	4980	1	clonotype609	clonotype609_consensus_1	single TCR
CAGCAGCTCGACAGCC-1	TRUE	CAGCAGCTCGACAGCC-1_contig_1	TRUE	872	TRB	TRBV5-6*01	TRBD1*01	TRBJ1-2*01	TRBC1*01	TRUE	TRUE	CASSPTGTELYGYTF	TGTGCCAGCAGCCCTACCGGGACAGAGCTCTATGGCTACACCTTC	34856	12	clonotype610	clonotype610_consensus_2	single TCR
CAGCAGCTCGACAGCC-1	TRUE	CAGCAGCTCGACAGCC-1_contig_2	TRUE	692	TRA	TRAV10*01	None	TRAJ4*01	TRAC*01	TRUE	TRUE	CVVRSISGGYNKLIF	TGTGTGGTGAGGTCAATTTCTGGTGGCTACAATAAGCTGATTTTT	19774	7	clonotype610	clonotype610_consensus_1	single TCR
CAGCATAAGAGCTGCA-1	TRUE	CAGCATAAGAGCTGCA-1_contig_1	TRUE	707	TRA	TRAV8-3*01	None	TRAJ27*01	TRAC*01	TRUE	TRUE	CAVGYNTNAGKSTF	TGTGCTGTGGGTTATAACACCAATGCAGGCAAATCAACCTTT	11062	4	clonotype612	clonotype612_consensus_2	single TCR
CAGCATAAGAGCTGCA-1	TRUE	CAGCATAAGAGCTGCA-1_contig_2	TRUE	658	TRB	TRBV2*01	TRBD2*01	TRBJ2-1*01	TRBC2*01	TRUE	TRUE	CASRPGLATYNEQFF	TGTGCCAGCAGGCCGGGACTAGCCACCTACAATGAGCAGTTCTTC	3347	1	clonotype612	clonotype612_consensus_1	single TCR
CAGCATACAGTTCCCT-1	TRUE	CAGCATACAGTTCCCT-1_contig_1	TRUE	668	TRB	TRBV29-1*01	TRBD2*01	TRBJ2-7*01	TRBC2*01	TRUE	TRUE	CSVGGGAIGYEQYF	TGCAGCGTTGGGGGGGGGGCGATCGGGTACGAGCAGTACTTC	4781	2	clonotype614	clonotype614_consensus_1	single TCR
CAGCATACAGTTCCCT-1	TRUE	CAGCATACAGTTCCCT-1_contig_4	TRUE	561	TRA	TRAV12-3*01	None	TRAJ13*02	TRAC*01	TRUE	TRUE	CAMSGYSGGYQKVTF	TGTGCAATGAGCGGGTATTCTGGGGGTTACCAGAAAGTTACCTTT	3638	1	clonotype614	clonotype614_consensus_2	single TCR
CAGCCGACAAGGTGTG-1	TRUE	CAGCCGACAAGGTGTG-1_contig_1	TRUE	932	TRB	TRBV5-1*01	TRBD2*01	TRBJ2-1*01	TRBC2*01	TRUE	TRUE	CASSLVVGGYPNEQFF	TGCGCCAGCAGCTTGGTCGTGGGCGGGTATCCCAATGAGCAGTTCTTC	47986	17	clonotype618	clonotype618_consensus_2	single TCR
CAGCCGACAAGGTGTG-1	TRUE	CAGCCGACAAGGTGTG-1_contig_4	TRUE	673	TRA	TRAV8-2*01	None	TRAJ44*01	TRAC*01	TRUE	TRUE	CVVIPSGGGTASKLTF	TGTGTTGTGATCCCTTCCGGAGGCGGCACTGCCAGTAAACTCACCTTT	10934	4	clonotype618	clonotype618_consensus_1	single TCR
CAGCCGAGTGGCAAAC-1	TRUE	CAGCCGAGTGGCAAAC-1_contig_1	TRUE	668	TRB	TRBV28*01	TRBD2*02	TRBJ1-5*01	TRBC1*01	TRUE	TRUE	CASSPRRAEDGNQPQHF	TGTGCCAGCAGTCCGAGGAGAGCGGAAGATGGCAATCAGCCCCAGCATTTT	7485	3	clonotype620	clonotype620_consensus_1	single TCR
CAGCCGAGTGGCAAAC-1	TRUE	CAGCCGAGTGGCAAAC-1_contig_3	TRUE	501	TRA	TRAV9-2*01	None	TRAJ3*01	TRAC*01	TRUE	TRUE	CALSDRYSSASKIIF	TGTGCTCTGAGTGATAGGTACAGCAGTGCTTCCAAGATAATCTTT	4252	1	clonotype620	clonotype620_consensus_2	single TCR
CAGCGACAGACATAAC-1	TRUE	CAGCGACAGACATAAC-1_contig_1	TRUE	539	TRA	TRAV38-2/DV8*01	None	TRAJ47*01	TRAC*01	TRUE	TRUE	CASAGGNKLVF	TGTGCTTCCGCGGGTGGAAACAAACTGGTCTTT	16483	4	clonotype622	clonotype622_consensus_1	single TCR
CAGCGACAGACATAAC-1	TRUE	CAGCGACAGACATAAC-1_contig_2	TRUE	492	TRB	TRBV4-2*01	None	TRBJ2-3*01	TRBC2*01	TRUE	TRUE	CASSQENGRTDTQYF	TGTGCCAGCAGCCAAGAAAACGGCAGAACAGATACGCAGTATTTT	1329	1	clonotype622	clonotype622_consensus_2	single TCR
CAGCGACAGATCCCGC-1	TRUE	CAGCGACAGATCCCGC-1_contig_1	TRUE	677	TRA	TRAV21*01	None	TRAJ15*01	TRAC*01	TRUE	TRUE	CAVRASNQAGTALIF	TGTGCTGTGAGGGCATCCAACCAGGCAGGAACTGCTCTGATCTTT	7224	2	clonotype623	clonotype623_consensus_2	single TCR
CAGCGACAGATCCCGC-1	TRUE	CAGCGACAGATCCCGC-1_contig_2	TRUE	695	TRB	TRBV14*01	TRBD1*01	TRBJ1-1*01	TRBC1*01	TRUE	TRUE	CASSQVGLMNTEAFF	TGTGCCAGCAGCCAAGTGGGGCTCATGAACACTGAAGCTTTCTTT	13732	7	clonotype623	clonotype623_consensus_1	single TCR
CAGCGACCACTTAAGC-1	TRUE	CAGCGACCACTTAAGC-1_contig_1	TRUE	937	TRB	TRBV5-1*01	None	TRBJ2-5*01	TRBC2*01	TRUE	TRUE	CASSTTQETQYF	TGCGCCAGCAGCACTACGCAAGAGACCCAGTACTTC	11476	4	clonotype626	clonotype626_consensus_1	single TCR
CAGCGACCACTTAAGC-1	TRUE	CAGCGACCACTTAAGC-1_contig_2	TRUE	463	TRA	TRAV12-3*01	None	TRAJ5*01	TRAC*01	TRUE	TRUE	CAIGGGRRALTF	TGTGCAATTGGTGGGGGCAGGAGAGCACTTACTTTT	3091	1	clonotype626	clonotype626_consensus_2	single TCR
CAGCGACCAGGGCATA-1	TRUE	CAGCGACCAGGGCATA-1_contig_1	TRUE	683	TRB	TRBV7-9*01	TRBD1*01	TRBJ2-7*01	TRBC2*01	TRUE	TRUE	CASSLAQGIGYEQYF	TGTGCCAGCAGCCTCGCACAGGGGATAGGATACGAGCAGTACTTC	3853	1	clonotype627	clonotype627_consensus_2	single TCR
CAGCGACCAGGGCATA-1	TRUE	CAGCGACCAGGGCATA-1_contig_3	TRUE	525	TRA	TRAV12-3*01	None	TRAJ22*01	TRAC*01	TRUE	TRUE	CAMSGPSSGSARQLTF	TGTGCAATGAGCGGCCCATCTTCTGGTTCTGCAAGGCAACTGACCTTT	4570	1	clonotype627	clonotype627_consensus_1	single TCR
CAGCTAACAAGGGTCA-1	TRUE	CAGCTAACAAGGGTCA-1_contig_1	TRUE	559	TRA	TRAV13-1*01	None	TRAJ36*01	TRAC*01	TRUE	TRUE	CAAIDQTGANNLFF	TGTGCAGCGATCGATCAAACTGGGGCAAACAACCTCTTCTTT	3836	1	clonotype632	clonotype632_consensus_2	single TCR
CAGCTAACAAGGGTCA-1	TRUE	CAGCTAACAAGGGTCA-1_contig_2	TRUE	569	TRB	TRBV20-1*02	None	TRBJ2-6*01	TRBC2*01	TRUE	TRUE	CSAPSGANVLTF	TGCAGTGCCCCCTCTGGGGCCAACGTCCTGACTTTC	8561	4	clonotype632	clonotype632_consensus_1	single TCR
CAGGTGCAGAGCCTAG-1	TRUE	CAGGTGCAGAGCCTAG-1_contig_1	TRUE	875	TRB	TRBV5-4*01	None	TRBJ2-2*01	TRBC2*01	TRUE	TRUE	CASSLESTGELFF	TGTGCCAGCAGCTTAGAGAGCACCGGGGAGCTGTTTTTT	31871	12	clonotype638	clonotype638_consensus_1	single TCR
CAGGTGCAGAGCCTAG-1	TRUE	CAGGTGCAGAGCCTAG-1_contig_2	TRUE	733	TRA	TRAV13-2*01	None	TRAJ13*02	TRAC*01	TRUE	TRUE	CAETYSGGYQKVTF	TGTGCAGAGACCTATTCTGGGGGTTACCAGAAAGTTACCTTT	12744	5	clonotype638	clonotype638_consensus_2	single TCR
CAGGTGCAGGACTGGT-1	TRUE	CAGGTGCAGGACTGGT-1_contig_1	TRUE	697	TRB	TRBV12-4*01	None	TRBJ1-1*01	TRBC1*01	TRUE	TRUE	CASSFSPGNTEAFF	TGTGCCAGCAGTTTTTCCCCGGGGAACACTGAAGCTTTCTTT	37478	13	clonotype639	clonotype639_consensus_2	single TCR
CAGGTGCAGGACTGGT-1	TRUE	CAGGTGCAGGACTGGT-1_contig_4	TRUE	497	TRA	TRAV38-2/DV8*01	None	TRAJ29*01	TRAC*01	TRUE	TRUE	CAYRSNSGNTPLVF	TGTGCTTATAGGTCGAATTCAGGAAACACACCTCTTGTCTTT	4763	2	clonotype639	clonotype639_consensus_1	single TCR
CAGGTGCCACCGAAAG-1	TRUE	CAGGTGCCACCGAAAG-1_contig_1	TRUE	566	TRA	TRAV12-3*01	None	TRAJ52*01	TRAC*01	TRUE	TRUE	CAMSGNAGGTSYGKLTF	TGTGCAATGAGCGGTAATGCTGGTGGTACTAGCTATGGAAAGCTGACATTT	3410	1	clonotype640	clonotype640_consensus_1	single TCR
CAGGTGCCACCGAAAG-1	TRUE	CAGGTGCCACCGAAAG-1_contig_2	TRUE	654	TRB	TRBV10-3*01	TRBD1*01	TRBJ1-3*01	TRBC1*01	TRUE	TRUE	CAHGGSGNTIYF	TGTGCCCACGGGGGCAGTGGAAACACCATATATTTT	15727	7	clonotype640	clonotype640_consensus_2	single TCR
CAGGTGCCATACGCCG-1	TRUE	CAGGTGCCATACGCCG-1_contig_1	TRUE	716	TRB	TRBV7-2*01	TRBD1*01	TRBJ1-1*01	TRBC1*01	TRUE	TRUE	CASSIDRGAFF	TGTGCCAGCAGCATCGACAGGGGTGCTTTCTTT	21780	8	clonotype641	clonotype641_consensus_1	single TCR
CAGGTGCCATACGCCG-1	TRUE	CAGGTGCCATACGCCG-1_contig_3	TRUE	685	TRA	TRAV8-3*01	None	TRAJ29*01	TRAC*01	TRUE	TRUE	CAVATPGNTPLVF	TGTGCTGTGGCGACCCCAGGAAACACACCTCTTGTCTTT	9983	4	clonotype641	clonotype641_consensus_2	single TCR
CAGTAACGTCACACGC-1	TRUE	CAGTAACGTCACACGC-1_contig_1	TRUE	724	TRB	TRBV5-5*01	TRBD1*01	TRBJ2-1*01	TRBC2*01	TRUE	TRUE	CASSFRGDSSYNEQFF	TGTGCCAGCAGCTTCCGAGGGGATAGCTCCTACAATGAGCAGTTCTTC	18548	7	clonotype645	clonotype645_consensus_1	single TCR
CAGTAACGTCACACGC-1	TRUE	CAGTAACGTCACACGC-1_contig_5	TRUE	637	TRA	TRAV8-3*01	None	TRAJ4*01	TRAC*01	TRUE	TRUE	CADGGYNKLIF	TGTGCCGATGGTGGCTACAATAAGCTGATTTTT	1462	1	clonotype645	clonotype645_consensus_2	single TCR
CAGTCCTAGAGGTTAT-1	TRUE	CAGTCCTAGAGGTTAT-1_contig_1	TRUE	708	TRB	TRBV20-1*02	TRBD1*01	TRBJ2-2*01	TRBC2*01	TRUE	TRUE	CSARVWIRGQDGELFF	TGCAGTGCTAGAGTTTGGATCAGGGGGCAAGACGGGGAGCTGTTTTTT	9849	5	clonotype647	clonotype647_consensus_1	single TCR
CAGTCCTAGAGGTTAT-1	TRUE	CAGTCCTAGAGGTTAT-1_contig_3	TRUE	541	TRA	TRAV26-1*01	None	TRAJ27*01	TRAC*01	TRUE	TRUE	CIVRVDTNAGKSTF	TGCATCGTCAGAGTGGACACCAATGCAGGCAAATCAACCTTT	3931	2	clonotype647	clonotype647_consensus_2	single TCR
CATATGGAGAAGGTTT-1	TRUE	CATATGGAGAAGGTTT-1_contig_1	TRUE	697	TRB	TRBV7-9*01	None	TRBJ2-1*01	TRBC2*01	TRUE	TRUE	CASSFSGNNEQFF	TGTGCCAGCAGCTTTTCCGGAAACAATGAGCAGTTCTTC	17545	6	clonotype649	clonotype649_consensus_2	single TCR
CATATGGAGAAGGTTT-1	TRUE	CATATGGAGAAGGTTT-1_contig_2	TRUE	477	TRA	TRAV36/DV7*01	None	TRAJ30*01	TRAC*01	TRUE	TRUE	CLIRDDKIIF	TGTCTGATCAGAGATGACAAGATCATCTTT	7350	2	clonotype649	clonotype649_consensus_1	single TCR
CATATGGCAAGCGTAG-1	TRUE	CATATGGCAAGCGTAG-1_contig_1	TRUE	651	TRB	TRBV20-1*02	TRBD1*01	TRBJ1-1*01	TRBC1*01	TRUE	TRUE	CSARAGVDTEAFF	TGCAGTGCTAGAGCAGGGGTTGACACTGAAGCTTTCTTT	6647	2	clonotype651	clonotype651_consensus_1	single TCR
CATATGGCAAGCGTAG-1	TRUE	CATATGGCAAGCGTAG-1_contig_4	TRUE	516	TRA	TRAV21*01	None	TRAJ53*01	TRAC*01	TRUE	TRUE	CASGGSNYKLTF	TGTGCGAGTGGAGGTAGCAACTATAAACTGACATTT	3196	1	clonotype651	clonotype651_consensus_2	single TCR
CATATGGCAGGGAGAG-1	TRUE	CATATGGCAGGGAGAG-1_contig_1	TRUE	453	TRA	TRAV9-2*01	None	TRAJ29*01	TRAC*01	TRUE	TRUE	CALSDRPGNTPLVF	TGTGCTCTGAGTGATCGGCCAGGAAACACACCTCTTGTCTTT	9024	2	clonotype653	clonotype653_consensus_2	single TCR
CATATGGCAGGGAGAG-1	TRUE	CATATGGCAGGGAGAG-1_contig_2	TRUE	466	TRB	TRBV28*01	TRBD1*01	TRBJ1-1*01	TRBC1*01	TRUE	TRUE	CASKDQGRNTEAFF	TGTGCCAGCAAGGATCAGGGTAGAAACACTGAAGCTTTCTTT	5364	2	clonotype653	clonotype653_consensus_1	single TCR
CATATGGTCAGTTCGA-1	TRUE	CATATGGTCAGTTCGA-1_contig_1	TRUE	676	TRB	TRBV7-2*02	TRBD1*01	TRBJ1-1*01	TRBC1*01	TRUE	TRUE	CASSVTGNTEAFF	TGTGCCAGCAGCGTAACCGGGAACACTGAAGCTTTCTTT	11357	4	clonotype654	clonotype654_consensus_1	single TCR
CATATGGTCAGTTCGA-1	TRUE	CATATGGTCAGTTCGA-1_contig_2	TRUE	556	TRA	TRAV14/DV4*01	None	TRAJ37*02	TRAC*01	TRUE	TRUE	CAMEAPSNTGKLIF	TGTGCAATGGAGGCACCTAGCAACACAGGCAAACTAATCTTT	3825	1	clonotype654	clonotype654_consensus_2	single TCR
CATATGGTCGAGGTAG-1	TRUE	CATATGGTCGAGGTAG-1_contig_1	TRUE	494	TRA	TRAV13-2*01	None	TRAJ42*01	TRAC*01	TRUE	TRUE	CAEKGGSQGNLIF	TGTGCAGAGAAGGGAGGAAGCCAAGGAAATCTCATCTTT	4170	1	clonotype655	clonotype655_consensus_1	single TCR
CATATGGTCGAGGTAG-1	TRUE	CATATGGTCGAGGTAG-1_contig_2	TRUE	681	TRB	TRBV5-1*01	TRBD1*01	TRBJ1-4*01	TRBC1*01	TRUE	TRUE	CASTRTGKDEKLFF	TGCGCCAGCACCCGGACAGGGAAAGATGAAAAACTGTTTTTT	8311	4	clonotype655	clonotype655_consensus_2	single TCR
CATATTCAGATCCGAG-1	TRUE	CATATTCAGATCCGAG-1_contig_1	TRUE	682	TRA	TRAV4*01	None	TRAJ8*01	TRAC*01	TRUE	TRUE	CLGLGFQKLVF	TGCCTCGGGCTAGGCTTTCAGAAACTTGTATTT	8841	3	clonotype656	clonotype656_consensus_2	single TCR
CATATTCAGATCCGAG-1	TRUE	CATATTCAGATCCGAG-1_contig_2	TRUE	571	TRB	TRBV7-9*01	TRBD1*01	TRBJ2-7*01	TRBC2*01	TRUE	TRUE	CASSLAPLGADSYEQYF	TGTGCCAGCAGCTTAGCGCCGTTGGGGGCCGATTCCTACGAGCAGTACTTC	6458	2	clonotype656	clonotype656_consensus_1	single TCR
CATATTCCACGGCGTT-1	TRUE	CATATTCCACGGCGTT-1_contig_1	TRUE	733	TRB	TRBV2*01	TRBD2*01	TRBJ2-5*01	TRBC2*01	TRUE	TRUE	CASRGLAGETQYF	TGTGCCAGCAGGGGACTAGCGGGAGAGACCCAGTACTTC	20636	6	clonotype659	clonotype659_consensus_1	single TCR
CATATTCCACGGCGTT-1	TRUE	CATATTCCACGGCGTT-1_contig_5	TRUE	745	TRA	TRAV26-1*01	None	TRAJ28*01	TRAC*01	TRUE	TRUE	CIVRVNSGAGSYQLTF	TGCATCGTCAGAGTCAACTCTGGGGCTGGGAGTTACCAACTCACTTTC	1733	1	clonotype659	clonotype659_consensus_2	single TCR
CATATTCCAGACGCCT-1	TRUE	CATATTCCAGACGCCT-1_contig_1	TRUE	642	TRB	TRBV6-2*01	TRBD1*01	TRBJ1-1*01	TRBC1*01	TRUE	TRUE	CASSPINLFGGTEAFF	TGTGCCAGCAGCCCGATAAACCTCTTTGGGGGCACTGAAGCTTTCTTT	21975	7	clonotype660	clonotype660_consensus_1	single TCR
CATATTCCAGACGCCT-1	TRUE	CATATTCCAGACGCCT-1_contig_5	TRUE	476	TRA	TRAV13-1*01	None	TRAJ3*01	TRAC*01	TRUE	TRUE	CAVSYSSASKIIF	TGTGCAGTATCGTACAGCAGTGCTTCCAAGATAATCTTT	3727	1	clonotype660	clonotype660_consensus_2	single TCR
CATATTCTCTACCTGC-1	TRUE	CATATTCTCTACCTGC-1_contig_1	TRUE	661	TRB	TRBV4-1*01	TRBD2*01	TRBJ2-3*01	TRBC2*01	TRUE	TRUE	CASSQDPGGVNTDTQYF	TGCGCCAGCAGCCAAGACCCGGGGGGGGTAAACACAGATACGCAGTATTTT	36585	16	clonotype664	clonotype664_consensus_1	single TCR
CATATTCTCTACCTGC-1	TRUE	CATATTCTCTACCTGC-1_contig_3	TRUE	896	TRA	TRAV8-4*01	None	TRAJ3*01	TRAC*01	TRUE	TRUE	CAVSALYSSASKIIF	TGTGCTGTGAGTGCCTTATACAGCAGTGCTTCCAAGATAATCTTT	8408	3	clonotype664	clonotype664_consensus_2	single TCR
CATCAAGCAGCCTTTC-1	TRUE	CATCAAGCAGCCTTTC-1_contig_1	TRUE	741	TRB	TRBV18*01	TRBD1*01	TRBJ1-4*01	TRBC1*01	TRUE	TRUE	CASSPLAGPYEKLFF	TGTGCCAGCTCACCACTGGCAGGGCCTTATGAAAAACTGTTTTTT	12779	4	clonotype666	clonotype666_consensus_2	single TCR
CATCAAGCAGCCTTTC-1	TRUE	CATCAAGCAGCCTTTC-1_contig_3	TRUE	710	TRA	TRAV29/DV5*01	None	TRAJ58*01	TRAC*01	TRUE	TRUE	CAASAVETSGSRLTF	TGTGCAGCAAGCGCGGTGGAAACCAGTGGCTCTAGGTTGACCTTT	8960	3	clonotype666	clonotype666_consensus_1	single TCR
CATCAAGTCAAAGTAG-1	TRUE	CATCAAGTCAAAGTAG-1_contig_1	TRUE	702	TRB	TRBV20-1*02	TRBD2*01	TRBJ1-1*01	TRBC1*01	TRUE	TRUE	CSARPHMGGPEAFF	TGCAGTGCTAGGCCCCACATGGGGGGACCTGAAGCTTTCTTT	11429	4	clonotype667	clonotype667_consensus_2	single TCR
CATCAAGTCAAAGTAG-1	TRUE	CATCAAGTCAAAGTAG-1_contig_2	TRUE	487	TRA	TRAV20*01	None	TRAJ44*01	TRAC*01	TRUE	TRUE	CAVGRINTGTASKLTF	TGTGCTGTGGGCCGGATAAATACCGGCACTGCCAGTAAACTCACCTTT	3816	1	clonotype667	clonotype667_consensus_1	single TCR
CATCCACAGCAGACTG-1	TRUE	CATCCACAGCAGACTG-1_contig_1	TRUE	708	TRB	TRBV20-1*02	None	TRBJ2-1*01	TRBC2*01	TRUE	TRUE	CSATPTERASYNEQFF	TGCAGTGCTACTCCTACCGAGCGCGCCTCCTACAATGAGCAGTTCTTC	22512	7	clonotype670	clonotype670_consensus_1	single TCR
CATCCACAGCAGACTG-1	TRUE	CATCCACAGCAGACTG-1_contig_2	TRUE	569	TRA	TRAV19*01	None	TRAJ3*01	TRAC*01	TRUE	TRUE	CALSEDSSASKIIF	TGTGCTCTGAGTGAGGACAGCAGTGCTTCCAAGATAATCTTT	3356	1	clonotype670	clonotype670_consensus_2	single TCR
CATCGAAAGAACAACT-1	TRUE	CATCGAAAGAACAACT-1_contig_1	TRUE	668	TRB	TRBV4-1*01	None	TRBJ1-1*01	TRBC1*01	TRUE	TRUE	CASSQEVVYGSPTEAFF	TGCGCCAGCAGCCAAGAGGTGGTGTACGGGTCTCCCACTGAAGCTTTCTTT	13346	4	clonotype673	clonotype673_consensus_2	single TCR
CATCGAAAGAACAACT-1	TRUE	CATCGAAAGAACAACT-1_contig_2	TRUE	505	TRA	TRAV38-2/DV8*01	None	TRAJ53*01	TRAC*01	TRUE	TRUE	CAYRTNSGGSNYKLTF	TGTGCTTATAGGACAAATAGTGGAGGTAGCAACTATAAACTGACATTT	3571	1	clonotype673	clonotype673_consensus_1	single TCR
CATCGAAAGTGAACGC-1	TRUE	CATCGAAAGTGAACGC-1_contig_1	TRUE	693	TRB	TRBV6-5*01	None	TRBJ2-2*01	TRBC2*01	TRUE	TRUE	CASRRKNTGELFF	TGTGCCAGCAGAAGGAAGAACACCGGGGAGCTGTTTTTT	10006	3	clonotype675	clonotype675_consensus_1	single TCR
CATCGAAAGTGAACGC-1	TRUE	CATCGAAAGTGAACGC-1_contig_4	TRUE	565	TRA	TRAV14/DV4*02	None	TRAJ57*01	TRAC*01	TRUE	TRUE	CAMRVGTEKLVF	TGTGCAATGAGAGTTGGAACTGAAAAGCTGGTCTTT	2812	1	clonotype675	clonotype675_consensus_2	single TCR
CATCGAAGTCTGGTCG-1	TRUE	CATCGAAGTCTGGTCG-1_contig_1	TRUE	592	TRA	TRAV16*01	None	TRAJ43*01	TRAC*01	TRUE	TRUE	CALKVGDMRF	TGTGCTCTAAAGGTTGGTGACATGCGCTTT	6577	3	clonotype676	clonotype676_consensus_2	single TCR
CATCGAAGTCTGGTCG-1	TRUE	CATCGAAGTCTGGTCG-1_contig_2	TRUE	561	TRB	TRBV6-1*01	TRBD2*01	TRBJ2-2*01	TRBC2*01	TRUE	TRUE	CASSRLAGSYTGELFF	TGTGCCAGCAGTCGACTAGCGGGGTCATACACCGGGGAGCTGTTTTTT	14553	4	clonotype676	clonotype676_consensus_1	single TCR
CATCGAAGTTATCACG-1	TRUE	CATCGAAGTTATCACG-1_contig_1	TRUE	697	TRB	TRBV27*01	TRBD1*01	TRBJ1-2*01	TRBC1*01	TRUE	TRUE	CASRMTGLSRYYGYTF	TGTGCCAGCAGAATGACAGGGTTGAGTAGATACTATGGCTACACCTTC	6700	2	clonotype677	clonotype677_consensus_1	single TCR
CATCGAAGTTATCACG-1	TRUE	CATCGAAGTTATCACG-1_contig_4	TRUE	512	TRA	TRAV13-2*01	None	TRAJ54*01	TRAC*01	TRUE	TRUE	CADIQGAQKLVF	TGTGCAGATATTCAGGGAGCCCAGAAGCTGGTATTT	11702	3	clonotype677	clonotype677_consensus_2	single TCR
CATCGGGCACGGTAAG-1	TRUE	CATCGGGCACGGTAAG-1_contig_1	TRUE	827	TRB	TRBV30*01	TRBD2*02	TRBJ1-2*01	TRBC1*01	TRUE	TRUE	CAWRPGEWDGYTF	TGTGCCTGGAGGCCGGGAGAATGGGATGGCTACACCTTC	19904	7	clonotype678	clonotype678_consensus_2	single TCR
CATCGGGCACGGTAAG-1	TRUE	CATCGGGCACGGTAAG-1_contig_3	TRUE	504	TRA	TRAV6*01	None	TRAJ26*01	TRAC*01	TRUE	TRUE	CAPNNYGQNFVF	TGTGCTCCTAATAACTATGGTCAGAATTTTGTCTTT	8028	2	clonotype678	clonotype678_consensus_1	single TCR
CATCGGGGTAACGCGA-1	TRUE	CATCGGGGTAACGCGA-1_contig_1	TRUE	685	TRB	TRBV7-2*01	TRBD1*01	TRBJ1-4*01	TRBC1*01	TRUE	TRUE	CASSRTGGEKLFF	TGTGCCAGCAGCCGGACAGGTGGCGAAAAACTGTTTTTT	18003	6	clonotype679	clonotype679_consensus_1	single TCR
CATCGGGGTAACGCGA-1	TRUE	CATCGGGGTAACGCGA-1_contig_3	TRUE	513	TRA	TRAV1-1*01	None	TRAJ44*01	TRAC*01	TRUE	TRUE	CAVDRGGTASKLTF	TGCGCTGTCGATCGGGGCGGCACTGCCAGTAAACTCACCTTT	3145	1	clonotype679	clonotype679_consensus_2	single TCR
CATCGGGTCGGTTCGG-1	TRUE	CATCGGGTCGGTTCGG-1_contig_1	TRUE	677	TRB	TRBV19*01	TRBD2*01	TRBJ1-1*01	TRBC1*01	TRUE	TRUE	CATRGSPSNTEAFF	TGTGCCACACGGGGGTCCCCGTCGAACACTGAAGCTTTCTTT	7338	3	clonotype683	clonotype683_consensus_2	single TCR
CATCGGGTCGGTTCGG-1	TRUE	CATCGGGTCGGTTCGG-1_contig_2	TRUE	519	TRA	TRAV13-2*01	None	TRAJ53*01	TRAC*01	TRUE	TRUE	CAENRGSNYKLTF	TGTGCAGAGAACAGGGGTAGCAACTATAAACTGACATTT	4479	1	clonotype683	clonotype683_consensus_1	single TCR
CATCGGGTCTGTTGAG-1	TRUE	CATCGGGTCTGTTGAG-1_contig_1	TRUE	713	TRB	TRBV6-1*01	TRBD1*01	TRBJ1-1*01	TRBC1*01	TRUE	TRUE	CASSVYRVTNTEAFF	TGTGCCAGCAGTGTATACAGGGTAACGAACACTGAAGCTTTCTTT	7041	2	clonotype684	clonotype684_consensus_2	single TCR
CATCGGGTCTGTTGAG-1	TRUE	CATCGGGTCTGTTGAG-1_contig_3	TRUE	590	TRA	TRAV23/DV6*01	None	TRAJ33*01	TRAC*01	TRUE	TRUE	CAAGAMDSNYQLIW	TGTGCAGCGGGAGCAATGGATAGCAACTATCAGTTAATCTGG	3211	1	clonotype684	clonotype684_consensus_1	single TCR
CATGACAGTAGCTAAA-1	TRUE	CATGACAGTAGCTAAA-1_contig_1	TRUE	692	TRB	TRBV7-2*02	None	TRBJ1-2*01	TRBC1*01	TRUE	TRUE	CASSLDRAAVYGYTF	TGTGCCAGCAGCTTAGATAGGGCAGCCGTCTATGGCTACACCTTC	27388	9	clonotype687	clonotype687_consensus_1	single TCR
CATGACAGTAGCTAAA-1	TRUE	CATGACAGTAGCTAAA-1_contig_4	TRUE	670	TRA	TRAV8-6*01	None	TRAJ15*01	TRAC*01	TRUE	TRUE	CAVRDQAGTALIF	TGTGCTGTGCGGGACCAGGCAGGAACTGCTCTGATCTTT	6283	2	clonotype687	clonotype687_consensus_2	single TCR
CATGACAGTGAAATCA-1	TRUE	CATGACAGTGAAATCA-1_contig_1	TRUE	515	TRA	TRAV17*01	None	TRAJ52*01	TRAC*01	TRUE	TRUE	CATDHAGGTSYGKLTF	TGTGCTACGGATCATGCTGGTGGTACTAGCTATGGAAAGCTGACATTT	4321	1	clonotype688	clonotype688_consensus_1	single TCR
CATGACAGTGAAATCA-1	TRUE	CATGACAGTGAAATCA-1_contig_2	TRUE	652	TRB	TRBV12-5*01	TRBD1*01	TRBJ2-3*01	TRBC2*01	TRUE	TRUE	CASGLSIRATGADTQYF	TGTGCTAGTGGTTTGTCCATACGGGCCACGGGGGCAGATACGCAGTATTTT	7699	2	clonotype688	clonotype688_consensus_2	single TCR
CATGACATCTTGCCGT-1	TRUE	CATGACATCTTGCCGT-1_contig_1	TRUE	466	TRA	TRAV2*01	None	TRAJ24*02	TRAC*01	TRUE	TRUE	CAVEDQLGKLQF	TGTGCTGTGGAGGATCAGTTGGGGAAATTGCAGTTT	13646	3	clonotype691	clonotype691_consensus_1	single TCR
CATGACATCTTGCCGT-1	TRUE	CATGACATCTTGCCGT-1_contig_2	TRUE	482	TRB	TRBV5-1*01	TRBD1*01	TRBJ1-2*01	TRBC1*01	TRUE	TRUE	CASHADRDYGYTF	TGCGCCAGCCACGCTGATAGGGACTATGGCTACACCTTC	3629	2	clonotype691	clonotype691_consensus_2	single TCR
CATGCCTTCGCGATCG-1	TRUE	CATGCCTTCGCGATCG-1_contig_1	TRUE	776	TRB	TRBV18*01	TRBD2*02	TRBJ1-2*01	TRBC1*01	TRUE	TRUE	CASSPSQGGTYGYTF	TGTGCCAGCTCACCTTCTCAGGGAGGGACCTATGGCTACACCTTC	12066	5	clonotype697	clonotype697_consensus_1	single TCR
CATGCCTTCGCGATCG-1	TRUE	CATGCCTTCGCGATCG-1_contig_2	TRUE	494	TRA	TRAV13-1*01	None	TRAJ30*01	TRAC*01	TRUE	TRUE	CAASKENRDDKIIF	TGTGCAGCAAGTAAGGAGAACAGAGATGACAAGATCATCTTT	3558	1	clonotype697	clonotype697_consensus_2	single TCR
CATGGCGCAATGTTGC-1	TRUE	CATGGCGCAATGTTGC-1_contig_1	TRUE	641	TRA	TRAV3*01	None	TRAJ37*02	TRAC*01	TRUE	TRUE	CAVRDEGSSNTGKLIF	TGTGCTGTGAGAGACGAAGGCTCTAGCAACACAGGCAAACTAATCTTT	5585	2	clonotype699	clonotype699_consensus_2	single TCR
CATGGCGCAATGTTGC-1	TRUE	CATGGCGCAATGTTGC-1_contig_2	TRUE	482	TRB	TRBV5-1*01	TRBD2*02	TRBJ2-5*01	TRBC2*01	TRUE	TRUE	CATKRDKETQYF	TGCGCCACTAAGCGAGATAAAGAGACCCAGTACTTC	11198	4	clonotype699	clonotype699_consensus_1	single TCR
CATGGCGTCAGAGGTG-1	TRUE	CATGGCGTCAGAGGTG-1_contig_1	TRUE	501	TRB	TRBV4-1*01	TRBD2*01	TRBJ2-3*01	TRBC2*01	TRUE	TRUE	CASSPDGLAGAFTDTQYF	TGCGCCAGCAGTCCCGATGGACTAGCGGGGGCGTTCACAGATACGCAGTATTTT	14934	5	clonotype700	clonotype700_consensus_1	single TCR
CATGGCGTCAGAGGTG-1	TRUE	CATGGCGTCAGAGGTG-1_contig_2	TRUE	651	TRA	TRAV8-4*01	None	TRAJ10*01	TRAC*01	TRUE	TRUE	CAVSGTGGGNKLTF	TGTGCTGTGAGTGGGACGGGAGGAGGAAACAAACTCACCTTT	2631	1	clonotype700	clonotype700_consensus_2	single TCR
CATTATCGTAGCTCCG-1	TRUE	CATTATCGTAGCTCCG-1_contig_1	TRUE	820	TRB	TRBV20-1*02	None	TRBJ1-2*01	TRBC1*01	TRUE	TRUE	CSALSPTNYGYTF	TGCAGTGCCCTATCACCAACTAACTATGGCTACACCTTC	1948	2	clonotype702	clonotype702_consensus_2	single TCR
CATTATCGTAGCTCCG-1	TRUE	CATTATCGTAGCTCCG-1_contig_2	TRUE	563	TRA	TRAV21*01	None	TRAJ29*01	TRAC*01	TRUE	TRUE	CAVPGNTPLVF	TGTGCTGTCCCAGGAAACACACCTCTTGTCTTT	3921	1	clonotype702	clonotype702_consensus_1	single TCR
CATTCGCGTCGAACAG-1	TRUE	CATTCGCGTCGAACAG-1_contig_2	TRUE	656	TRB	TRBV2*01	None	TRBJ1-4*01	TRBC1*01	TRUE	TRUE	CASIQDATNEKLFF	TGTGCCAGCATTCAGGACGCAACTAATGAAAAACTGTTTTTT	1799	1	clonotype706	clonotype706_consensus_1	single TCR
CATTCGCGTCGAACAG-1	TRUE	CATTCGCGTCGAACAG-1_contig_4	TRUE	502	TRA	TRAV13-2*01	None	TRAJ42*01	TRAC*01	TRUE	TRUE	CAEILRGSQGNLIF	TGTGCAGAGATCCTCCGAGGAAGCCAAGGAAATCTCATCTTT	3431	1	clonotype706	clonotype706_consensus_2	single TCR
CCAATCCAGGTAAACT-1	TRUE	CCAATCCAGGTAAACT-1_contig_1	TRUE	800	TRB	TRBV14*01	TRBD1*01	TRBJ2-1*01	TRBC2*01	TRUE	TRUE	CASSKDPGQGARFF	TGTGCCAGCAGCAAAGACCCGGGACAGGGGGCTAGGTTCTTC	8700	5	clonotype711	clonotype711_consensus_2	single TCR
CCAATCCAGGTAAACT-1	TRUE	CCAATCCAGGTAAACT-1_contig_2	TRUE	563	TRA	TRAV13-1*01	None	TRAJ43*01	TRAC*01	TRUE	TRUE	CAASRRNNDMRF	TGTGCAGCAAGTAGGAGAAACAATGACATGCGCTTT	3596	1	clonotype711	clonotype711_consensus_1	single TCR
CCAATCCCAATAACGA-1	TRUE	CCAATCCCAATAACGA-1_contig_2	TRUE	859	TRB	TRBV5-4*01	TRBD1*01	TRBJ2-3*01	TRBC1*01	TRUE	TRUE	CASSGGQGRTDTQYF	TGTGCCAGCAGCGGAGGACAGGGGCGCACAGATACGCAGTATTTT	6335	2	clonotype712	clonotype712_consensus_2	single TCR
CCAATCCCAATAACGA-1	TRUE	CCAATCCCAATAACGA-1_contig_5	TRUE	636	TRA	TRAV8-4*01	None	TRAJ43*01	TRAC*01	TRUE	TRUE	CAVSTNNDMRF	TGTGCCGTCTCGACCAACAATGACATGCGCTTT	2808	1	clonotype712	clonotype712_consensus_1	single TCR
CCAATCCCAGCGTTCG-1	TRUE	CCAATCCCAGCGTTCG-1_contig_1	TRUE	526	TRA	TRAV21*01	None	TRAJ18*01	TRAC*01	TRUE	TRUE	CAAGDRGSTLGRLYF	TGTGCTGCGGGCGACAGAGGCTCAACCCTGGGGAGGCTATACTTT	11838	3	clonotype713	clonotype713_consensus_1	single TCR
CCAATCCCAGCGTTCG-1	TRUE	CCAATCCCAGCGTTCG-1_contig_2	TRUE	700	TRB	TRBV5-4*01	TRBD2*02	TRBJ2-4*01	TRBC2*01	TRUE	TRUE	CASSIRDGKNIQYF	TGTGCCAGCAGCATACGGGACGGAAAAAACATTCAGTACTTC	9482	5	clonotype713	clonotype713_consensus_2	single TCR
CCAATCCTCTTGAGGT-1	TRUE	CCAATCCTCTTGAGGT-1_contig_1	TRUE	583	TRA	TRAV26-1*01	None	TRAJ49*01	TRAC*01	TRUE	TRUE	CIVRPEINQFYF	TGCATCGTCAGACCGGAGATTAACCAGTTCTATTTT	3707	1	clonotype716	clonotype716_consensus_2	single TCR
CCAATCCTCTTGAGGT-1	TRUE	CCAATCCTCTTGAGGT-1_contig_3	TRUE	676	TRB	TRBV20-1*02	TRBD2*02	TRBJ2-1*01	TRBC2*01	TRUE	TRUE	CSAKSSGRANEQFF	TGCAGTGCGAAATCATCTGGGAGAGCCAATGAGCAGTTCTTC	5755	2	clonotype716	clonotype716_consensus_1	single TCR
CCACGGAAGGGATCTG-1	TRUE	CCACGGAAGGGATCTG-1_contig_1	TRUE	540	TRB	TRBV18*01	TRBD1*01	TRBJ2-2*01	TRBC2*01	TRUE	TRUE	CASSPDRVPTGELFF	TGTGCCAGCTCACCCGACAGGGTACCCACCGGGGAGCTGTTTTTT	3593	2	clonotype719	clonotype719_consensus_2	single TCR
CCACGGAAGGGATCTG-1	TRUE	CCACGGAAGGGATCTG-1_contig_3	TRUE	501	TRA	TRAV8-2*01	None	TRAJ11*01	TRAC*01	TRUE	TRUE	CVVTYSTLTF	TGTGTTGTGACCTACAGCACCCTCACCTTT	3596	1	clonotype719	clonotype719_consensus_1	single TCR
CCACGGACACAGGCCT-1	TRUE	CCACGGACACAGGCCT-1_contig_1	TRUE	699	TRB	TRBV3-1*01	TRBD1*01	TRBJ1-2*01	TRBC1*01	TRUE	TRUE	CASSQAPTTGSNYGYTF	TGTGCCAGCAGCCAAGCCCCTACGACAGGAAGTAACTATGGCTACACCTTC	5634	2	clonotype720	clonotype720_consensus_1	single TCR
CCACGGACACAGGCCT-1	TRUE	CCACGGACACAGGCCT-1_contig_3	TRUE	544	TRA	TRAV25*01	None	TRAJ40*01	TRAC*01	TRUE	TRUE	CGGPSGTYKYIF	TGTGGAGGACCTTCAGGAACCTACAAATACATCTTT	438	1	clonotype720	clonotype720_consensus_2	single TCR
CCACGGACACGGTGTC-1	TRUE	CCACGGACACGGTGTC-1_contig_1	TRUE	669	TRB	TRBV2*01	None	TRBJ2-1*01	TRBC2*01	TRUE	TRUE	CASTMSNEQFF	TGTGCCAGCACTATGAGCAATGAGCAGTTCTTC	8928	3	clonotype721	clonotype721_consensus_1	single TCR
CCACGGACACGGTGTC-1	TRUE	CCACGGACACGGTGTC-1_contig_3	TRUE	523	TRA	TRAV21*01	None	TRAJ23*01	TRAC*01	TRUE	TRUE	CAVPIYNQGGKLIF	TGTGCTGTCCCGATTTATAACCAGGGAGGAAAGCTTATCTTC	4211	1	clonotype721	clonotype721_consensus_2	single TCR
CCACGGAGTTACGGAG-1	TRUE	CCACGGAGTTACGGAG-1_contig_1	TRUE	686	TRB	TRBV7-9*01	TRBD1*01	TRBJ2-1*01	TRBC2*01	TRUE	TRUE	CASSLALTGGNNEQFF	TGTGCCAGCAGCTTAGCGCTAACAGGGGGCAACAATGAGCAGTTCTTC	10546	4	clonotype722	clonotype722_consensus_2	single TCR
CCACGGAGTTACGGAG-1	TRUE	CCACGGAGTTACGGAG-1_contig_3	TRUE	834	TRA	TRAV8-3*01	None	TRAJ31*01	TRAC*01	TRUE	TRUE	CAVGERNNNARLMF	TGTGCTGTGGGCGAACGGAATAACAATGCCAGACTCATGTTT	2311	1	clonotype722	clonotype722_consensus_1	single TCR
CCACTACCAGCAGTTT-1	TRUE	CCACTACCAGCAGTTT-1_contig_1	TRUE	663	TRB	TRBV20-1*02	TRBD1*01	TRBJ1-1*01	TRBC1*01	TRUE	TRUE	CSATTGGDTEAFF	TGCAGTGCCACAACAGGGGGGGACACTGAAGCTTTCTTT	3224	1	clonotype724	clonotype724_consensus_1	single TCR
CCACTACCAGCAGTTT-1	TRUE	CCACTACCAGCAGTTT-1_contig_3	TRUE	574	TRA	TRAV19*01	None	TRAJ9*01	TRAC*01	TRUE	TRUE	CALSEGRTGGFKTIF	TGTGCTCTGAGTGAGGGGAGGACTGGAGGCTTCAAAACTATCTTT	3687	1	clonotype724	clonotype724_consensus_2	single TCR
CCAGCGAAGCGTCAAG-1	TRUE	CCAGCGAAGCGTCAAG-1_contig_1	TRUE	541	TRA	TRAV23/DV6*01	None	TRAJ39*01	TRAC*01	TRUE	TRUE	CAASRGRNNAGNMLTF	TGTGCAGCAAGCAGGGGGAGGAATAATGCAGGCAACATGCTCACCTTT	3694	1	clonotype726	clonotype726_consensus_2	single TCR
CCAGCGAAGCGTCAAG-1	TRUE	CCAGCGAAGCGTCAAG-1_contig_2	TRUE	700	TRB	TRBV4-2*01	TRBD2*01	TRBJ2-2*01	TRBC2*01	TRUE	TRUE	CASSQVGAGANTGELFF	TGTGCCAGCAGCCAAGTTGGAGCGGGGGCTAACACCGGGGAGCTGTTTTTT	5447	7	clonotype726	clonotype726_consensus_1	single TCR
CCATGTCCAGCTCGAC-1	TRUE	CCATGTCCAGCTCGAC-1_contig_2	TRUE	457	TRA	TRAV38-2/DV8*01	None	TRAJ29*01	TRAC*01	TRUE	TRUE	CAYQPPLVF	TGTGCTTATCAGCCTCCTCTTGTCTTT	3525	1	clonotype730	clonotype730_consensus_2	single TCR
CCATGTCCAGCTCGAC-1	TRUE	CCATGTCCAGCTCGAC-1_contig_3	TRUE	678	TRB	TRBV20-1*02	TRBD1*01	TRBJ1-2*01	TRBC1*01	TRUE	TRUE	CSARDLGGMVRGYTF	TGCAGTGCTAGAGATCTGGGGGGCATGGTGAGGGGCTACACCTTC	7530	2	clonotype730	clonotype730_consensus_1	single TCR
CCCAATCGTACGCTGC-1	TRUE	CCCAATCGTACGCTGC-1_contig_1	TRUE	719	TRB	TRBV6-5*01	TRBD2*01	TRBJ2-7*01	TRBC2*01	TRUE	TRUE	CASTNGVYEQYF	TGTGCCAGCACCAACGGGGTCTACGAGCAGTACTTC	53040	18	clonotype734	clonotype734_consensus_2	single TCR
CCCAATCGTACGCTGC-1	TRUE	CCCAATCGTACGCTGC-1_contig_4	TRUE	595	TRA	TRAV17*01	None	TRAJ49*01	TRAC*01	TRUE	TRUE	CAPTGNQFYF	TGTGCTCCCACCGGTAACCAGTTCTATTTT	3121	1	clonotype734	clonotype734_consensus_1	single TCR
CCCAATCTCAACACCA-1	TRUE	CCCAATCTCAACACCA-1_contig_1	TRUE	675	TRB	TRBV4-2*01	TRBD2*02	TRBJ2-3*01	TRBC2*01	TRUE	TRUE	CASSHDSPGPGGTDTQYF	TGTGCCAGCAGCCACGACAGTCCGGGCCCGGGAGGAACAGATACGCAGTATTTT	17575	6	clonotype736	clonotype736_consensus_1	single TCR
CCCAATCTCAACACCA-1	TRUE	CCCAATCTCAACACCA-1_contig_2	TRUE	654	TRA	TRAV12-2*01	None	TRAJ29*01	TRAC*01	TRUE	TRUE	CAPPPSGNTPLVF	TGTGCCCCCCCGCCTTCAGGAAACACACCTCTTGTCTTT	3243	2	clonotype736	clonotype736_consensus_2	single TCR
CCCAATCTCTCGCTTG-1	TRUE	CCCAATCTCTCGCTTG-1_contig_2	TRUE	716	TRB	TRBV6-1*01	TRBD1*01	TRBJ1-6*01	TRBC1*01	TRUE	TRUE	CASSPQGGNSPLHF	TGTGCCAGCAGTCCTCAGGGGGGGAATTCACCCCTCCACTTT	6549	2	clonotype737	clonotype737_consensus_1	single TCR
CCCAATCTCTCGCTTG-1	TRUE	CCCAATCTCTCGCTTG-1_contig_3	TRUE	554	TRA	TRAV13-2*01	None	TRAJ20*01	TRAC*01	TRUE	TRUE	CAENNDDYKLSF	TGTGCAGAGAATAACGACGACTACAAGCTCAGCTTT	13203	4	clonotype737	clonotype737_consensus_2	single TCR
CCCAGTTCATGAACCT-1	TRUE	CCCAGTTCATGAACCT-1_contig_1	TRUE	620	TRA	TRAV8-4*01	None	TRAJ5*01	TRAC*01	TRUE	TRUE	CAVIGRTGRRALTF	TGTGCTGTGATCGGAAGGACGGGCAGGAGAGCACTTACTTTT	3948	1	clonotype739	clonotype739_consensus_2	single TCR
CCCAGTTCATGAACCT-1	TRUE	CCCAGTTCATGAACCT-1_contig_2	TRUE	712	TRB	TRBV20-1*02	TRBD2*01	TRBJ2-1*01	TRBC2*01	TRUE	TRUE	CSARVPGLAEINNEQFF	TGCAGTGCTAGAGTCCCGGGTCTAGCGGAAATAAACAATGAGCAGTTCTTC	13774	4	clonotype739	clonotype739_consensus_1	single TCR
CCCAGTTTCACGCGGT-1	TRUE	CCCAGTTTCACGCGGT-1_contig_1	TRUE	697	TRA	TRAV3*01	None	TRAJ47*02	TRAC*01	TRUE	TRUE	CAVRDSGGNKLVF	TGTGCTGTGAGAGACTCGGGTGGAAACAAGCTGGTCTTT	11206	4	clonotype742	clonotype742_consensus_1	single TCR
CCCAGTTTCACGCGGT-1	TRUE	CCCAGTTTCACGCGGT-1_contig_2	TRUE	849	TRB	TRBV12-4*01	TRBD2*01	TRBJ2-1*01	TRBC2*01	TRUE	TRUE	CASTTSGIPYNEQFF	TGTGCCAGCACCACCTCGGGGATACCCTACAATGAGCAGTTCTTC	11524	8	clonotype742	clonotype742_consensus_2	single TCR
CCCATACTCGCGGATC-1	TRUE	CCCATACTCGCGGATC-1_contig_1	TRUE	722	TRB	TRBV3-1*01	TRBD2*01	TRBJ2-3*01	TRBC1*01	TRUE	TRUE	CASSQDLSGGPGWNTQYF	TGTGCCAGCAGCCAAGATTTGAGCGGGGGCCCGGGGTGGAATACGCAGTATTTT	22811	9	clonotype743	clonotype743_consensus_2	single TCR
CCCATACTCGCGGATC-1	TRUE	CCCATACTCGCGGATC-1_contig_2	TRUE	496	TRA	TRAV12-1*01	None	TRAJ9*01	TRAC*01	TRUE	TRUE	CVVSAAGGFKTIF	TGTGTGGTGAGCGCGGCTGGAGGCTTCAAAACTATCTTT	4099	1	clonotype743	clonotype743_consensus_1	single TCR
CCCTCCTCACGCTTTC-1	TRUE	CCCTCCTCACGCTTTC-1_contig_1	TRUE	585	TRA	TRAV14/DV4*01	None	TRAJ34*01	TRAC*01	TRUE	TRUE	CAMRRSYNTDKLIF	TGTGCAATGAGAAGATCTTATAACACCGACAAGCTCATCTTT	10022	3	clonotype746	clonotype746_consensus_1	single TCR
CCCTCCTCACGCTTTC-1	TRUE	CCCTCCTCACGCTTTC-1_contig_2	TRUE	690	TRB	TRBV5-1*01	TRBD1*01	TRBJ2-2*01	TRBC2*01	TRUE	TRUE	CASSPPTGAGGELFF	TGCGCCAGCAGCCCCCCGACAGGGGCAGGCGGGGAGCTGTTTTTT	16012	5	clonotype746	clonotype746_consensus_2	single TCR
CCGGGATAGACCTTTG-1	TRUE	CCGGGATAGACCTTTG-1_contig_1	TRUE	577	TRB	TRBV3-1*01	TRBD2*01	TRBJ2-5*01	TRBC2*01	TRUE	TRUE	CASSPLLAGGQETQYF	TGTGCCAGCAGCCCCCTGCTAGCGGGGGGCCAAGAGACCCAGTACTTC	17934	7	clonotype750	clonotype750_consensus_1	single TCR
CCGGGATAGACCTTTG-1	TRUE	CCGGGATAGACCTTTG-1_contig_3	TRUE	577	TRA	TRAV29/DV5*01	None	TRAJ31*01	TRAC*01	TRUE	TRUE	CAATYNNARLMF	TGTGCAGCAACCTATAACAATGCCAGACTCATGTTT	5550	2	clonotype750	clonotype750_consensus_2	single TCR
CCGGGATAGTAGCCGA-1	TRUE	CCGGGATAGTAGCCGA-1_contig_1	TRUE	682	TRA	TRAV8-3*01	None	TRAJ26*01	TRAC*01	TRUE	TRUE	CAVENYGQNFVF	TGTGCTGTGGAGAACTATGGTCAGAATTTTGTCTTT	9292	4	clonotype751	clonotype751_consensus_1	single TCR
CCGGGATAGTAGCCGA-1	TRUE	CCGGGATAGTAGCCGA-1_contig_3	TRUE	652	TRB	TRBV6-1*01	TRBD1*01	TRBJ1-2*01	TRBC1*01	TRUE	TRUE	CASRAGSGYGYTF	TGTGCCAGCAGAGCAGGGTCAGGCTATGGCTACACCTTC	6452	2	clonotype751	clonotype751_consensus_2	single TCR
CCGGTAGGTAAGTTCC-1	TRUE	CCGGTAGGTAAGTTCC-1_contig_1	TRUE	659	TRB	TRBV10-3*01	None	TRBJ1-5*01	TRBC1*01	TRUE	TRUE	CAISERVSNQPQHF	TGTGCCATCAGTGAGCGGGTTAGCAATCAGCCCCAGCATTTT	66318	24	clonotype754	clonotype754_consensus_1	single TCR
CCGGTAGGTAAGTTCC-1	TRUE	CCGGTAGGTAAGTTCC-1_contig_4	TRUE	577	TRA	TRAV23/DV6*01	None	TRAJ58*01	TRAC*01	TRUE	TRUE	CAASMRETSGSRLTF	TGTGCAGCAAGCATGCGAGAAACCAGTGGCTCTAGGTTGACCTTT	3375	1	clonotype754	clonotype754_consensus_2	single TCR
CCGTACTAGCCACTAT-1	TRUE	CCGTACTAGCCACTAT-1_contig_1	TRUE	685	TRB	TRBV12-4*01	None	TRBJ2-3*01	TRBC2*01	TRUE	TRUE	CASSPGSTDTQYF	TGTGCCAGCAGTCCCGGGAGCACAGATACGCAGTATTTT	18041	6	clonotype757	clonotype757_consensus_2	single TCR
CCGTACTAGCCACTAT-1	TRUE	CCGTACTAGCCACTAT-1_contig_4	TRUE	643	TRA	TRAV9-2*01	None	TRAJ38*01	TRAC*01	TRUE	TRUE	CALRDAGNNRKLIW	TGTGCTCTGAGGGACGCTGGCAACAACCGTAAGCTGATTTGG	15865	4	clonotype757	clonotype757_consensus_1	single TCR
CCGTACTAGGTGCTTT-1	TRUE	CCGTACTAGGTGCTTT-1_contig_1	TRUE	772	TRB	TRBV7-9*03	None	TRBJ2-5*01	TRBC2*01	TRUE	TRUE	CASSLKFRTRRETQYF	TGTGCCAGCAGCTTAAAGTTCCGTACCCGGCGGGAGACCCAGTACTTC	33344	10	clonotype758	clonotype758_consensus_1	single TCR
CCGTACTAGGTGCTTT-1	TRUE	CCGTACTAGGTGCTTT-1_contig_3	TRUE	758	TRA	TRAV19*01	None	TRAJ58*01	TRAC*01	TRUE	TRUE	CALSGKETSGSRLTF	TGTGCTCTGAGTGGAAAAGAAACCAGTGGCTCTAGGTTGACCTTT	1879	1	clonotype758	clonotype758_consensus_2	single TCR
CCGTACTCATGGTTGT-1	TRUE	CCGTACTCATGGTTGT-1_contig_2	TRUE	677	TRB	TRBV2*01	TRBD1*01	TRBJ2-4*01	TRBC2*01	TRUE	TRUE	CASRGGFGKNIQYF	TGTGCCAGCAGAGGGGGATTCGGCAAAAACATTCAGTACTTC	3489	1	clonotype759	clonotype759_consensus_1	single TCR
CCGTACTCATGGTTGT-1	TRUE	CCGTACTCATGGTTGT-1_contig_3	TRUE	601	TRA	TRAV23/DV6*01	None	TRAJ21*01	TRAC*01	TRUE	TRUE	CAASKGGYNFNKFYF	TGTGCAGCAAGCAAGGGGGGATACAACTTCAACAAATTTTACTTT	8509	3	clonotype759	clonotype759_consensus_2	single TCR
CCGTACTGTAAGTGGC-1	TRUE	CCGTACTGTAAGTGGC-1_contig_1	TRUE	706	TRB	TRBV3-1*01	TRBD2*02	TRBJ2-1*01	TRBC2*01	TRUE	TRUE	CASSPRTSGRGIYNEQFF	TGTGCCAGCAGCCCCCGGACTAGCGGGAGGGGAATTTACAATGAGCAGTTCTTC	14048	5	clonotype760	clonotype760_consensus_2	single TCR
CCGTACTGTAAGTGGC-1	TRUE	CCGTACTGTAAGTGGC-1_contig_2	TRUE	545	TRA	TRAV19*01	None	TRAJ36*01	TRAC*01	TRUE	TRUE	CALILWGGANNLFF	TGTGCTCTGATCCTTTGGGGTGGGGCAAACAACCTCTTCTTT	2250	1	clonotype760	clonotype760_consensus_1	single TCR
CCGTACTGTCCATGAT-1	TRUE	CCGTACTGTCCATGAT-1_contig_2	TRUE	609	TRA	TRAV5*01	None	TRAJ30*01	TRAC*01	TRUE	TRUE	CAENWDRDDKIIF	TGTGCAGAGAACTGGGACAGAGATGACAAGATCATCTTT	8477	4	clonotype761	clonotype761_consensus_1	single TCR
CCGTACTGTCCATGAT-1	TRUE	CCGTACTGTCCATGAT-1_contig_3	TRUE	836	TRB	TRBV5-6*01	TRBD1*01	TRBJ1-2*01	TRBC1*01	TRUE	TRUE	CASSFSGVDYGYTF	TGTGCCAGCAGCTTCAGTGGGGTCGACTATGGCTACACCTTC	4402	2	clonotype761	clonotype761_consensus_2	single TCR
CCGTACTGTCTACCTC-1	TRUE	CCGTACTGTCTACCTC-1_contig_1	TRUE	723	TRB	TRBV9*01	None	TRBJ2-7*01	TRBC2*01	TRUE	TRUE	CASSVVDGYEQYF	TGTGCCAGCAGCGTAGTCGACGGCTACGAGCAGTACTTC	10449	3	clonotype762	clonotype762_consensus_2	single TCR
CCGTACTGTCTACCTC-1	TRUE	CCGTACTGTCTACCTC-1_contig_2	TRUE	557	TRA	TRAV24*01	None	TRAJ49*01	TRAC*01	TRUE	TRUE	CAAKVGTGNQFYF	TGTGCCGCCAAGGTGGGCACCGGTAACCAGTTCTATTTT	10332	3	clonotype762	clonotype762_consensus_1	single TCR
CCGTACTGTTGATTGC-1	TRUE	CCGTACTGTTGATTGC-1_contig_1	TRUE	663	TRB	TRBV10-3*01	TRBD1*01	TRBJ1-1*01	TRBC1*01	TRUE	TRUE	CAISDRGQGWDTEAFF	TGTGCCATCAGTGACCGAGGTCAGGGCTGGGACACTGAAGCTTTCTTT	10508	3	clonotype763	clonotype763_consensus_1	single TCR
CCGTACTGTTGATTGC-1	TRUE	CCGTACTGTTGATTGC-1_contig_3	TRUE	508	TRA	TRAV4*01	None	TRAJ17*01	TRAC*01	TRUE	TRUE	CLVAKEAAGNKLTF	TGCCTCGTGGCCAAGGAAGCTGCAGGCAACAAGCTAACTTTT	11861	3	clonotype763	clonotype763_consensus_2	single TCR
CCGTGGAAGATGCCTT-1	TRUE	CCGTGGAAGATGCCTT-1_contig_1	TRUE	705	TRB	TRBV11-2*03	TRBD1*01	TRBJ2-7*01	TRBC2*01	TRUE	TRUE	CASSFPLSPPGQAPYEQYF	TGTGCCAGCAGCTTTCCCCTATCGCCGCCGGGACAGGCCCCCTACGAGCAGTACTTC	22886	7	clonotype764	clonotype764_consensus_1	single TCR
CCGTGGAAGATGCCTT-1	TRUE	CCGTGGAAGATGCCTT-1_contig_3	TRUE	561	TRA	TRAV27*01	None	TRAJ45*01	TRAC*01	TRUE	TRUE	CAGGGADGLTF	TGTGCAGGAGGAGGTGCTGACGGACTCACCTTT	12593	3	clonotype764	clonotype764_consensus_2	single TCR
CCGTGGAAGGCACATG-1	TRUE	CCGTGGAAGGCACATG-1_contig_1	TRUE	546	TRB	TRBV3-1*01	TRBD1*01	TRBJ1-1*01	TRBC1*01	TRUE	TRUE	CASSRQGNTEAFF	TGTGCCAGCAGTCGACAGGGGAACACTGAAGCTTTCTTT	16097	6	clonotype765	clonotype765_consensus_1	single TCR
CCGTGGAAGGCACATG-1	TRUE	CCGTGGAAGGCACATG-1_contig_2	TRUE	521	TRA	TRAV29/DV5*01	None	TRAJ52*01	TRAC*01	TRUE	TRUE	CAAIAGGTSYGKLTF	TGTGCAGCAATAGCTGGTGGTACTAGCTATGGAAAGCTGACATTT	4139	1	clonotype765	clonotype765_consensus_2	single TCR
CCGTGGACAAGGCTCC-1	TRUE	CCGTGGACAAGGCTCC-1_contig_1	TRUE	696	TRB	TRBV20-1*02	TRBD2*01	TRBJ2-7*01	TRBC2*01	TRUE	TRUE	CSAGLVSYEQYF	TGCAGTGCTGGACTAGTTTCCTACGAGCAGTACTTC	4503	2	clonotype766	clonotype766_consensus_1	single TCR
CCGTGGACAAGGCTCC-1	TRUE	CCGTGGACAAGGCTCC-1_contig_2	TRUE	513	TRA	TRAV13-2*01	None	TRAJ5*01	TRAC*01	TRUE	TRUE	CAENPTGRRALTF	TGTGCAGAGAATCCCACGGGCAGGAGAGCACTTACTTTT	3982	1	clonotype766	clonotype766_consensus_2	single TCR
CCGTGGAGTGATGATA-1	TRUE	CCGTGGAGTGATGATA-1_contig_1	TRUE	678	TRB	TRBV7-7*01	TRBD2*02	TRBJ2-1*01	TRBC2*01	TRUE	TRUE	CASSLYGGISSYNEQFF	TGTGCTAGCAGCTTGTACGGCGGGATTAGCTCCTACAATGAGCAGTTCTTC	6710	2	clonotype767	clonotype767_consensus_1	single TCR
CCGTGGAGTGATGATA-1	TRUE	CCGTGGAGTGATGATA-1_contig_3	TRUE	547	TRA	TRAV14/DV4*01	None	TRAJ34*01	TRAC*01	TRUE	TRUE	CAMREAWITDKLIF	TGTGCAATGAGAGAGGCCTGGATCACCGACAAGCTCATCTTT	3381	1	clonotype767	clonotype767_consensus_2	single TCR
CCGTGGAGTTCGTCTC-1	TRUE	CCGTGGAGTTCGTCTC-1_contig_1	TRUE	677	TRB	TRBV4-1*01	TRBD2*01	TRBJ2-5*01	TRBC2*01	TRUE	TRUE	CASSQARGLSGGPWETQYF	TGCGCCAGCAGCCAAGCCAGGGGGCTTAGCGGGGGACCCTGGGAGACCCAGTACTTC	16462	6	clonotype768	clonotype768_consensus_2	single TCR
CCGTGGAGTTCGTCTC-1	TRUE	CCGTGGAGTTCGTCTC-1_contig_2	TRUE	557	TRA	TRAV14/DV4*01	None	TRAJ54*01	TRAC*01	TRUE	TRUE	CAMREETLSIQGAQKLVF	TGTGCAATGAGAGAAGAGACCTTATCAATTCAGGGAGCCCAGAAGCTGGTATTT	1596	1	clonotype768	clonotype768_consensus_1	single TCR
CCTAAAGCAAACTGTC-1	TRUE	CCTAAAGCAAACTGTC-1_contig_1	TRUE	726	TRB	TRBV6-1*01	TRBD2*02	TRBJ2-1*01	TRBC2*01	TRUE	TRUE	CASSVAGGPSNEQFF	TGTGCCAGCAGTGTAGCGGGAGGGCCTTCGAATGAGCAGTTCTTC	46711	14	clonotype772	clonotype772_consensus_2	single TCR
CCTAAAGCAAACTGTC-1	TRUE	CCTAAAGCAAACTGTC-1_contig_3	TRUE	499	TRA	TRAV12-3*01	None	TRAJ11*01	TRAC*01	TRUE	TRUE	CAMRDSGYSTLTF	TGTGCAATGAGGGATTCAGGATACAGCACCCTCACCTTT	8613	2	clonotype772	clonotype772_consensus_1	single TCR
CCTAAAGCAGCAGTTT-1	TRUE	CCTAAAGCAGCAGTTT-1_contig_1	TRUE	489	TRB	TRBV10-3*01	TRBD1*01	TRBJ1-2*01	TRBC1*01	TRUE	TRUE	CAIRLTGTGVDGYTF	TGTGCCATCAGACTTACCGGGACAGGGGTGGATGGCTACACCTTC	8656	3	clonotype773	clonotype773_consensus_2	single TCR
CCTAAAGCAGCAGTTT-1	TRUE	CCTAAAGCAGCAGTTT-1_contig_2	TRUE	530	TRA	TRAV26-1*01	None	TRAJ22*01	TRAC*01	TRUE	TRUE	CIVRISSGSARQLTF	TGCATCGTCAGAATTTCTTCTGGTTCTGCAAGGCAACTGACCTTT	3114	1	clonotype773	clonotype773_consensus_1	single TCR
CCTAAAGTCTTGTATC-1	TRUE	CCTAAAGTCTTGTATC-1_contig_1	TRUE	588	TRA	TRAV41*01	None	TRAJ43*01	TRAC*01	TRUE	TRUE	CAVIFNNDMRF	TGTGCTGTAATTTTTAACAATGACATGCGCTTT	4311	2	clonotype775	clonotype775_consensus_1	single TCR
CCTAAAGTCTTGTATC-1	TRUE	CCTAAAGTCTTGTATC-1_contig_2	TRUE	518	TRB	TRBV6-5*01	TRBD1*01	TRBJ1-1*01	TRBC1*01	TRUE	TRUE	CASSETGNTEAFF	TGTGCCAGCAGTGAAACAGGGAACACTGAAGCTTTCTTT	11626	5	clonotype775	clonotype775_consensus_2	single TCR
CCTACACAGAGAACAG-1	TRUE	CCTACACAGAGAACAG-1_contig_1	TRUE	574	TRB	TRBV20-1*02	TRBD1*01	TRBJ2-3*01	TRBC2*01	TRUE	TRUE	CSAGRTRTSTDTQYF	TGCAGTGCTGGTCGGACAAGGACAAGCACAGATACGCAGTATTTT	19149	7	clonotype776	clonotype776_consensus_1	single TCR
CCTACACAGAGAACAG-1	TRUE	CCTACACAGAGAACAG-1_contig_2	TRUE	519	TRA	TRAV13-1*01	None	TRAJ34*01	TRAC*01	TRUE	TRUE	CAASINTDKLIF	TGTGCAGCAAGTATAAACACCGACAAGCTCATCTTT	7528	2	clonotype776	clonotype776_consensus_2	single TCR
CCTACACAGAGACTAT-1	TRUE	CCTACACAGAGACTAT-1_contig_1	TRUE	694	TRB	TRBV12-3*01	TRBD2*02	TRBJ2-1*01	TRBC2*01	TRUE	TRUE	CASSLALREGYNEQFF	TGTGCCAGCAGTTTGGCTTTGCGGGAGGGGTACAATGAGCAGTTCTTC	19487	8	clonotype777	clonotype777_consensus_1	single TCR
CCTACACAGAGACTAT-1	TRUE	CCTACACAGAGACTAT-1_contig_4	TRUE	590	TRA	TRAV12-2*01	None	TRAJ7*01	TRAC*01	TRUE	TRUE	CAVNGGNNRLAF	TGTGCCGTGAACGGTGGGAACAACAGACTCGCTTTT	13744	4	clonotype777	clonotype777_consensus_2	single TCR
CCTACACAGATCGATA-1	TRUE	CCTACACAGATCGATA-1_contig_1	TRUE	636	TRB	TRBV18*01	TRBD2*01	TRBJ2-3*01	TRBC2*01	TRUE	TRUE	CASSTTSGPTDTQYF	TGTGCCAGCTCCACTACTAGCGGCCCAACAGATACGCAGTATTTT	9436	3	clonotype779	clonotype779_consensus_2	single TCR
CCTACACAGATCGATA-1	TRUE	CCTACACAGATCGATA-1_contig_2	TRUE	664	TRA	TRAV8-6*02	None	TRAJ20*01	TRAC*01	TRUE	TRUE	CAVSDRGDYKLSF	TGTGCTGTGAGTGATCGGGGCGACTACAAGCTCAGCTTT	3188	1	clonotype779	clonotype779_consensus_1	single TCR
CCTACACCAACTGCTA-1	TRUE	CCTACACCAACTGCTA-1_contig_2	TRUE	665	TRB	TRBV5-1*01	TRBD1*01	TRBJ1-6*01	TRBC1*01	TRUE	TRUE	CASTSSGQGANSPLHF	TGCGCCAGCACCTCTAGCGGACAGGGGGCTAATTCACCCCTCCACTTT	3188	1	clonotype780	clonotype780_consensus_2	single TCR
CCTACACCAACTGCTA-1	TRUE	CCTACACCAACTGCTA-1_contig_3	TRUE	592	TRA	TRAV25*01	None	TRAJ53*01	TRAC*01	TRUE	TRUE	CAGRGGGSNYKLTF	TGTGCAGGGAGAGGTGGAGGTAGCAACTATAAACTGACATTT	186	1	clonotype780	clonotype780_consensus_1	single TCR
CCTACCAAGGAGTACC-1	TRUE	CCTACCAAGGAGTACC-1_contig_1	TRUE	655	TRB	TRBV4-1*01	None	TRBJ2-7*01	TRBC2*01	TRUE	TRUE	CASSHYLGYEQYF	TGCGCCAGCAGCCATTATCTGGGCTACGAGCAGTACTTC	10702	4	clonotype784	clonotype784_consensus_2	single TCR
CCTACCAAGGAGTACC-1	TRUE	CCTACCAAGGAGTACC-1_contig_2	TRUE	499	TRA	TRAV17*01	None	TRAJ54*01	TRAC*01	TRUE	TRUE	CATDGGAQKLVF	TGTGCTACGGACGGGGGAGCCCAGAAGCTGGTATTT	4200	1	clonotype784	clonotype784_consensus_1	single TCR
CCTACCAGTTACTGAC-1	TRUE	CCTACCAGTTACTGAC-1_contig_1	TRUE	528	TRA	TRAV13-1*01	None	TRAJ42*01	TRAC*01	TRUE	TRUE	CAASRGGSQGNLIF	TGTGCAGCAAGTAGGGGAGGAAGCCAAGGAAATCTCATCTTT	3579	1	clonotype786	clonotype786_consensus_1	single TCR
CCTACCAGTTACTGAC-1	TRUE	CCTACCAGTTACTGAC-1_contig_2	TRUE	719	TRB	TRBV6-1*01	TRBD1*01	TRBJ2-5*01	TRBC2*01	TRUE	TRUE	CASSEISEGRGTQYF	TGTGCCAGCAGTGAAATTTCTGAGGGCAGGGGGACCCAGTACTTC	5782	4	clonotype786	clonotype786_consensus_2	single TCR
CCTACCAGTTCGCGAC-1	TRUE	CCTACCAGTTCGCGAC-1_contig_1	TRUE	732	TRB	TRBV7-9*03	TRBD1*01	TRBJ1-2*01	TRBC1*01	TRUE	TRUE	CASSSTGVNYGYTF	TGTGCCAGCAGCTCGACAGGAGTTAACTATGGCTACACCTTC	11040	4	clonotype787	clonotype787_consensus_1	single TCR
CCTACCAGTTCGCGAC-1	TRUE	CCTACCAGTTCGCGAC-1_contig_4	TRUE	554	TRA	TRAV5*01	None	TRAJ42*01	TRAC*01	TRUE	TRUE	CAAPRSSQGNLIF	TGTGCAGCCCCCCGGTCGAGCCAAGGAAATCTCATCTTT	3787	1	clonotype787	clonotype787_consensus_2	single TCR
CCTATTAAGCTAAACA-1	TRUE	CCTATTAAGCTAAACA-1_contig_1	TRUE	689	TRB	TRBV7-9*01	None	TRBJ1-3*01	TRBC1*01	TRUE	TRUE	CASSLFRTISGNTIYF	TGTGCCAGCAGCTTGTTCCGGACCATCTCTGGAAACACCATATATTTT	13790	4	clonotype789	clonotype789_consensus_2	single TCR
CCTATTAAGCTAAACA-1	TRUE	CCTATTAAGCTAAACA-1_contig_2	TRUE	548	TRA	TRAV29/DV5*01	None	TRAJ58*01	TRAC*01	TRUE	TRUE	CAASGETSGSRLTF	TGTGCAGCAAGCGGGGAAACCAGTGGCTCTAGGTTGACCTTT	3888	1	clonotype789	clonotype789_consensus_1	single TCR
CCTATTACACTATCTT-1	TRUE	CCTATTACACTATCTT-1_contig_1	TRUE	594	TRA	TRAV29/DV5*01	None	TRAJ43*01	TRAC*01	TRUE	TRUE	CAASGGYNNNDMRF	TGTGCAGCAAGCGGGGGGTACAATAACAATGACATGCGCTTT	14455	4	clonotype791	clonotype791_consensus_1	single TCR
CCTATTACACTATCTT-1	TRUE	CCTATTACACTATCTT-1_contig_2	TRUE	502	TRB	TRBV15*01	None	TRBJ2-4*01	TRBC2*01	TRUE	TRUE	CATSRGPLAKNIQYF	TGTGCCACCAGCAGAGGGCCCTTAGCCAAAAACATTCAGTACTTC	6185	2	clonotype791	clonotype791_consensus_2	single TCR
CCTCAGTAGCAGGCTA-1	TRUE	CCTCAGTAGCAGGCTA-1_contig_1	TRUE	659	TRB	TRBV4-1*01	TRBD2*01	TRBJ2-3*01	TRBC2*01	TRUE	TRUE	CASSPGLKTDTQYF	TGCGCCAGCAGCCCGGGACTTAAGACAGATACGCAGTATTTT	12757	4	clonotype796	clonotype796_consensus_1	single TCR
CCTCAGTAGCAGGCTA-1	TRUE	CCTCAGTAGCAGGCTA-1_contig_2	TRUE	493	TRA	TRAV29/DV5*01	None	TRAJ44*01	TRAC*01	TRUE	TRUE	CAGYTGTASKLTF	TGTGCAGGATATACCGGCACTGCCAGTAAACTCACCTTT	4113	1	clonotype796	clonotype796_consensus_2	single TCR
CCTCAGTTCATGCATG-1	TRUE	CCTCAGTTCATGCATG-1_contig_1	TRUE	552	TRB	TRBV13*01	TRBD1*01	TRBJ1-1*01	TRBC1*01	TRUE	TRUE	CASSRGQGRWNTEAFF	TGTGCCAGCAGCCGAGGACAGGGTCGTTGGAACACTGAAGCTTTCTTT	13265	5	clonotype799	clonotype799_consensus_2	single TCR
CCTCAGTTCATGCATG-1	TRUE	CCTCAGTTCATGCATG-1_contig_3	TRUE	461	TRA	TRAV26-1*01	None	TRAJ30*01	TRAC*01	TRUE	TRUE	CIVRVGRDDKIIF	TGCATCGTCAGAGTCGGTAGAGATGACAAGATCATCTTT	4158	1	clonotype799	clonotype799_consensus_1	single TCR
CCTCTGAAGTGAACAT-1	TRUE	CCTCTGAAGTGAACAT-1_contig_1	TRUE	651	TRB	TRBV28*01	TRBD1*01	TRBJ1-5*01	TRBC1*01	TRUE	TRUE	CASSLPGQNQPQHF	TGTGCCAGCAGTTTGCCCGGACAGAATCAGCCCCAGCATTTT	13645	6	clonotype801	clonotype801_consensus_1	single TCR
CCTCTGAAGTGAACAT-1	TRUE	CCTCTGAAGTGAACAT-1_contig_2	TRUE	720	TRA	TRAV13-2*01	None	TRAJ15*01	TRAC*01	TRUE	TRUE	CAENQAGTALIF	TGTGCAGAGAACCAGGCAGGAACTGCTCTGATCTTT	10804	3	clonotype801	clonotype801_consensus_2	single TCR
CCTTCCCCACAGACAG-1	TRUE	CCTTCCCCACAGACAG-1_contig_1	TRUE	706	TRB	TRBV20-1*02	TRBD2*02	TRBJ2-7*01	TRBC2*01	TRUE	TRUE	CSARDLAGGNYEQYF	TGCAGTGCTAGAGATTTGGCGGGAGGAAACTACGAGCAGTACTTC	20660	7	clonotype806	clonotype806_consensus_2	single TCR
CCTTCCCCACAGACAG-1	TRUE	CCTTCCCCACAGACAG-1_contig_2	TRUE	500	TRA	TRAV12-1*01	None	TRAJ34*01	TRAC*01	TRUE	TRUE	CVVNLWNTDKLIF	TGTGTGGTGAACCTGTGGAACACCGACAAGCTCATCTTT	4814	1	clonotype806	clonotype806_consensus_1	single TCR
CCTTCCCCACTCTGTC-1	TRUE	CCTTCCCCACTCTGTC-1_contig_1	TRUE	805	TRB	TRBV13*01	TRBD1*01	TRBJ2-1*01	TRBC2*01	TRUE	TRUE	CASSEGQINEQFF	TGTGCCAGCAGCGAGGGACAGATCAATGAGCAGTTCTTC	27518	10	clonotype808	clonotype808_consensus_1	single TCR
CCTTCCCCACTCTGTC-1	TRUE	CCTTCCCCACTCTGTC-1_contig_3	TRUE	678	TRA	TRAV24*01	None	TRAJ53*01	TRAC*01	TRUE	TRUE	CAFSGGSNYKLTF	TGTGCCTTTAGTGGAGGTAGCAACTATAAACTGACATTT	3684	1	clonotype808	clonotype808_consensus_2	single TCR
CCTTCCCTCTTGCAAG-1	TRUE	CCTTCCCTCTTGCAAG-1_contig_1	TRUE	674	TRB	TRBV18*01	TRBD1*01	TRBJ2-1*01	TRBC2*01	TRUE	TRUE	CASSPPGALYNEQFF	TGTGCCAGCTCACCACCAGGGGCTCTCTACAATGAGCAGTTCTTC	5541	2	clonotype809	clonotype809_consensus_1	single TCR
CCTTCCCTCTTGCAAG-1	TRUE	CCTTCCCTCTTGCAAG-1_contig_2	TRUE	550	TRA	TRAV12-2*01	None	TRAJ48*01	TRAC*01	TRUE	TRUE	CAVIPFGNEKLTF	TGTGCCGTCATTCCCTTTGGAAATGAGAAATTAACCTTT	4282	1	clonotype809	clonotype809_consensus_2	single TCR
CCTTTCTAGAGTCTGG-1	TRUE	CCTTTCTAGAGTCTGG-1_contig_1	TRUE	657	TRA	TRAV8-3*01	None	TRAJ47*01	TRAC*01	TRUE	TRUE	CAAELVF	TGTGCTGCCGAACTGGTCTTT	16115	4	clonotype811	clonotype811_consensus_2	single TCR
CCTTTCTAGAGTCTGG-1	TRUE	CCTTTCTAGAGTCTGG-1_contig_2	TRUE	809	TRB	TRBV19*01	None	TRBJ1-1*01	TRBC1*01	TRUE	TRUE	CASNNGLNTEAFF	TGTGCCAGTAATAACGGATTGAACACTGAAGCTTTCTTT	10751	4	clonotype811	clonotype811_consensus_1	single TCR
CCTTTCTCAGGTCCAC-1	TRUE	CCTTTCTCAGGTCCAC-1_contig_1	TRUE	688	TRB	TRBV11-1*01	None	TRBJ2-2*01	TRBC2*01	TRUE	TRUE	CASSLDRHTGELFF	TGTGCCAGCAGCTTAGATAGACACACCGGGGAGCTGTTTTTT	16698	6	clonotype813	clonotype813_consensus_2	single TCR
CCTTTCTCAGGTCCAC-1	TRUE	CCTTTCTCAGGTCCAC-1_contig_2	TRUE	565	TRA	TRAV12-3*01	None	TRAJ53*01	TRAC*01	TRUE	TRUE	CAMRRGRGGSNYKLTF	TGTGCAATGAGAAGGGGGCGTGGAGGTAGCAACTATAAACTGACATTT	10277	3	clonotype813	clonotype813_consensus_1	single TCR
CGAACATCACAGGCCT-1	TRUE	CGAACATCACAGGCCT-1_contig_1	TRUE	533	TRB	TRBV20-1*02	TRBD2*01	TRBJ2-1*01	TRBC2*01	TRUE	TRUE	CSARQAGASSYNEQFF	TGCAGTGCCCGACAAGCGGGGGCCAGCTCCTACAATGAGCAGTTCTTC	9525	3	clonotype817	clonotype817_consensus_1	single TCR
CGAACATCACAGGCCT-1	TRUE	CGAACATCACAGGCCT-1_contig_2	TRUE	555	TRA	TRAV39*01	None	TRAJ27*01	TRAC*01	TRUE	TRUE	CAVDKTNAGKSTF	TGTGCCGTGGACAAAACCAATGCAGGCAAATCAACCTTT	3703	1	clonotype817	clonotype817_consensus_2	single TCR
CGAACATCAGCTATTG-1	TRUE	CGAACATCAGCTATTG-1_contig_1	TRUE	661	TRB	TRBV28*01	TRBD1*01	TRBJ1-1*01	TRBC1*01	TRUE	TRUE	CASSLPISGAMNTEAFF	TGTGCCAGCAGTTTACCTATCTCAGGGGCAATGAACACTGAAGCTTTCTTT	6853	3	clonotype818	clonotype818_consensus_2	single TCR
CGAACATCAGCTATTG-1	TRUE	CGAACATCAGCTATTG-1_contig_4	TRUE	897	TRA	TRAV8-6*01	None	TRAJ30*01	TRAC*01	TRUE	TRUE	CAVSEFRDDKIIF	TGTGCTGTGAGTGAATTTAGAGATGACAAGATCATCTTT	994	1	clonotype818	clonotype818_consensus_1	single TCR
CGAACATGTATATGAG-1	TRUE	CGAACATGTATATGAG-1_contig_1	TRUE	576	TRA	TRAV23/DV6*01	None	TRAJ29*01	TRAC*01	TRUE	TRUE	CAATYQGNTPLVF	TGTGCAGCAACATATCAGGGAAACACACCTCTTGTCTTT	3014	1	clonotype819	clonotype819_consensus_2	single TCR
CGAACATGTATATGAG-1	TRUE	CGAACATGTATATGAG-1_contig_2	TRUE	731	TRB	TRBV11-3*01	TRBD2*02	TRBJ1-1*01	TRBC1*01	TRUE	TRUE	CASSLVEGTEAFF	TGTGCCAGCAGCTTAGTAGAGGGAACTGAAGCTTTCTTT	6754	5	clonotype819	clonotype819_consensus_1	single TCR
CGAATGTCAATGAATG-1	TRUE	CGAATGTCAATGAATG-1_contig_1	TRUE	607	TRA	TRAV12-3*01	None	TRAJ40*01	TRAC*01	TRUE	TRUE	CAMSATGTYKYIF	TGTGCAATGAGCGCAACGGGAACCTACAAATACATCTTT	6743	2	clonotype824	clonotype824_consensus_1	single TCR
CGAATGTCAATGAATG-1	TRUE	CGAATGTCAATGAATG-1_contig_2	TRUE	671	TRB	TRBV2*01	None	TRBJ2-7*01	TRBC1*01	TRUE	TRUE	CASSQTKYEQYF	TGTGCCAGCAGCCAAACTAAATACGAGCAGTACTTC	3611	1	clonotype824	clonotype824_consensus_2	single TCR
CGAATGTTCCTAGTGA-1	TRUE	CGAATGTTCCTAGTGA-1_contig_1	TRUE	527	TRB	TRBV3-1*01	TRBD2*01	TRBJ2-5*01	TRBC2*01	TRUE	TRUE	CASSQRTLQETQYF	TGTGCCAGCAGCCAGAGGACTCTCCAAGAGACCCAGTACTTC	18201	7	clonotype826	clonotype826_consensus_2	single TCR
CGAATGTTCCTAGTGA-1	TRUE	CGAATGTTCCTAGTGA-1_contig_2	TRUE	578	TRA	TRAV27*01	None	TRAJ44*01	TRAC*01	TRUE	TRUE	CAGGTGTASKLTF	TGTGCAGGAGGAACCGGCACTGCCAGTAAACTCACCTTT	10250	3	clonotype826	clonotype826_consensus_1	single TCR
CGACCTTAGTTTCCTT-1	TRUE	CGACCTTAGTTTCCTT-1_contig_1	TRUE	560	TRA	TRAV12-2*01	None	TRAJ13*02	TRAC*01	TRUE	TRUE	CAVRPPGYQKVTF	TGTGCCGTGCGTCCCCCGGGTTACCAGAAAGTTACCTTT	8251	2	clonotype827	clonotype827_consensus_2	single TCR
CGACCTTAGTTTCCTT-1	TRUE	CGACCTTAGTTTCCTT-1_contig_2	TRUE	528	TRB	TRBV14*01	TRBD1*01	TRBJ2-2*01	TRBC2*01	TRUE	TRUE	CASSQGPTGGYTGELFF	TGTGCCAGCAGCCAAGGCCCGACAGGGGGGTACACCGGGGAGCTGTTTTTT	4950	3	clonotype827	clonotype827_consensus_1	single TCR
CGACCTTGTAGAGGAA-1	TRUE	CGACCTTGTAGAGGAA-1_contig_1	TRUE	542	TRA	TRAV2*01	None	TRAJ10*01	TRAC*01	TRUE	TRUE	CAVLALTGGGNKLTF	TGTGCTGTGTTGGCGCTCACGGGAGGAGGAAACAAACTCACCTTT	10079	2	clonotype830	clonotype830_consensus_1	single TCR
CGACCTTGTAGAGGAA-1	TRUE	CGACCTTGTAGAGGAA-1_contig_4	TRUE	728	TRB	TRBV30*01	TRBD1*01	TRBJ1-5*01	TRBC1*01	TRUE	TRUE	CAWSQGLSNQPQHF	TGTGCCTGGTCACAGGGGCTCAGCAATCAGCCCCAGCATTTT	2870	1	clonotype830	clonotype830_consensus_2	single TCR
CGACCTTGTAGGACAC-1	TRUE	CGACCTTGTAGGACAC-1_contig_1	TRUE	681	TRB	TRBV7-6*01	TRBD1*01	TRBJ1-2*01	TRBC1*01	TRUE	TRUE	CASSAGTDYGYTF	TGTGCCAGCAGCGCCGGGACAGATTATGGCTACACCTTC	11263	4	clonotype831	clonotype831_consensus_2	single TCR
CGACCTTGTAGGACAC-1	TRUE	CGACCTTGTAGGACAC-1_contig_2	TRUE	512	TRA	TRAV21*01	None	TRAJ28*01	TRAC*01	TRUE	TRUE	CAVPPRTYSGAGSYQLTF	TGTGCTGTGCCTCCTCGGACATACTCTGGGGCTGGGAGTTACCAACTCACTTTC	3722	1	clonotype831	clonotype831_consensus_1	single TCR
CGACCTTGTCGTGGCT-1	TRUE	CGACCTTGTCGTGGCT-1_contig_1	TRUE	688	TRB	TRBV20-1*02	TRBD2*01	TRBJ2-1*01	TRBC2*01	TRUE	TRUE	CSASPGTSWNEQFF	TGCAGTGCTAGCCCCGGGACTAGCTGGAATGAGCAGTTCTTC	8099	3	clonotype832	clonotype832_consensus_1	single TCR
CGACCTTGTCGTGGCT-1	TRUE	CGACCTTGTCGTGGCT-1_contig_3	TRUE	752	TRA	TRAV4*01	None	TRAJ17*01	TRAC*01	TRUE	TRUE	CLVGVPIKAAGNKLTF	TGCCTCGTGGGTGTCCCGATCAAAGCTGCAGGCAACAAGCTAACTTTT	2275	1	clonotype832	clonotype832_consensus_2	single TCR
CGACTTCCAGTGGAGT-1	TRUE	CGACTTCCAGTGGAGT-1_contig_1	TRUE	711	TRB	TRBV20-1*02	TRBD2*01	TRBJ2-1*01	TRBC2*01	TRUE	TRUE	CSATTPLTSGDTNEQFF	TGCAGTGCTACAACTCCCCTGACTAGCGGGGATACCAATGAGCAGTTCTTC	13157	4	clonotype835	clonotype835_consensus_2	single TCR
CGACTTCCAGTGGAGT-1	TRUE	CGACTTCCAGTGGAGT-1_contig_2	TRUE	528	TRA	TRAV2*01	None	TRAJ30*01	TRAC*01	TRUE	TRUE	CAVGPMKIIF	TGTGCTGTGGGGCCTATGAAGATCATCTTT	8534	3	clonotype835	clonotype835_consensus_1	single TCR
CGACTTCGTCCATCCT-1	TRUE	CGACTTCGTCCATCCT-1_contig_1	TRUE	502	TRA	TRAV9-1*01	None	TRAJ9*01	TRAC*01	TRUE	TRUE	CALSINTGGFKTIF	TGTGCTCTGAGCATAAATACTGGAGGCTTCAAAACTATCTTT	4571	1	clonotype836	clonotype836_consensus_2	single TCR
CGACTTCGTCCATCCT-1	TRUE	CGACTTCGTCCATCCT-1_contig_3	TRUE	571	TRB	TRBV7-9*03	TRBD1*01	TRBJ2-7*01	TRBC2*01	TRUE	TRUE	CASSFGTGASYEQYF	TGTGCCAGCAGCTTCGGGACAGGGGCGTCCTACGAGCAGTACTTC	14773	4	clonotype836	clonotype836_consensus_1	single TCR
CGACTTCGTCGCTTCT-1	TRUE	CGACTTCGTCGCTTCT-1_contig_1	TRUE	506	TRA	TRAV26-1*01	None	TRAJ53*01	TRAC*01	TRUE	TRUE	CIGGGSNYKLTF	TGCATTGGGGGAGGTAGCAACTATAAACTGACATTT	3301	1	clonotype837	clonotype837_consensus_2	single TCR
CGACTTCGTCGCTTCT-1	TRUE	CGACTTCGTCGCTTCT-1_contig_2	TRUE	631	TRB	TRBV5-1*01	TRBD1*01	TRBJ1-1*01	TRBC1*01	TRUE	TRUE	CASRMDRATEAFF	TGCGCCAGCAGGATGGACAGGGCAACTGAAGCTTTCTTT	4671	2	clonotype837	clonotype837_consensus_1	single TCR
CGACTTCGTCTCTCGT-1	TRUE	CGACTTCGTCTCTCGT-1_contig_1	TRUE	696	TRB	TRBV20-1*02	None	TRBJ1-1*01	TRBC1*01	TRUE	TRUE	CSARSGNTEAFF	TGCAGTGCTAGGAGTGGGAACACTGAAGCTTTCTTT	33264	10	clonotype838	clonotype838_consensus_2	single TCR
CGACTTCGTCTCTCGT-1	TRUE	CGACTTCGTCTCTCGT-1_contig_3	TRUE	552	TRA	TRAV12-1*01	None	TRAJ43*01	TRAC*01	TRUE	TRUE	CVVNRGNNDMRF	TGTGTGGTGAACCGGGGAAACAATGACATGCGCTTT	12366	3	clonotype838	clonotype838_consensus_1	single TCR
CGACTTCGTGGCGAAT-1	TRUE	CGACTTCGTGGCGAAT-1_contig_1	TRUE	848	TRB	TRBV19*01	TRBD2*01	TRBJ2-2*01	TRBC2*01	TRUE	TRUE	CASRGGGGELFF	TGTGCCAGTAGGGGGGGAGGCGGGGAGCTGTTTTTT	3834	2	clonotype839	clonotype839_consensus_2	single TCR
CGACTTCGTGGCGAAT-1	TRUE	CGACTTCGTGGCGAAT-1_contig_4	TRUE	554	TRA	TRAV12-2*01	None	TRAJ13*02	TRAC*01	TRUE	TRUE	CAVKGNSGGYQKVTF	TGTGCCGTGAAGGGGAATTCTGGGGGTTACCAGAAAGTTACCTTT	3333	1	clonotype839	clonotype839_consensus_1	single TCR
CGAGAAGAGGAGCGTT-1	TRUE	CGAGAAGAGGAGCGTT-1_contig_1	TRUE	556	TRB	TRBV20-1*02	TRBD2*01	TRBJ2-5*01	TRBC2*01	TRUE	TRUE	CSARDLSGAQETQYF	TGCAGTGCTAGAGATCTTAGTGGGGCGCAAGAGACCCAGTACTTC	7876	3	clonotype842	clonotype842_consensus_1	single TCR
CGAGAAGAGGAGCGTT-1	TRUE	CGAGAAGAGGAGCGTT-1_contig_2	TRUE	676	TRA	TRAV8-3*01	None	TRAJ27*01	TRAC*01	TRUE	TRUE	CAVGTAGKSTF	TGTGCTGTGGGTACAGCAGGCAAATCAACCTTT	3445	2	clonotype842	clonotype842_consensus_2	single TCR
CGAGAAGCAGCCACCA-1	TRUE	CGAGAAGCAGCCACCA-1_contig_1	TRUE	545	TRB	TRBV20-1*02	TRBD1*01	TRBJ1-2*01	TRBC1*01	TRUE	TRUE	CSARALTGRSDYGYTF	TGCAGTGCTAGGGCTTTGACAGGGCGATCGGACTATGGCTACACCTTC	9798	3	clonotype843	clonotype843_consensus_2	single TCR
CGAGAAGCAGCCACCA-1	TRUE	CGAGAAGCAGCCACCA-1_contig_2	TRUE	693	TRA	TRAV3*01	None	TRAJ4*01	TRAC*01	TRUE	TRUE	CAVRDEGISGGYNKLIF	TGTGCTGTGAGAGACGAGGGAATTTCTGGTGGCTACAATAAGCTGATTTTT	2822	1	clonotype843	clonotype843_consensus_1	single TCR
CGAGAAGCATATGAGA-1	TRUE	CGAGAAGCATATGAGA-1_contig_1	TRUE	529	TRA	TRAV21*01	None	TRAJ10*01	TRAC*01	TRUE	TRUE	CAVRAGGGNKLTF	TGTGCTGTGAGGGCGGGAGGAGGAAACAAACTCACCTTT	18445	5	clonotype844	clonotype844_consensus_1	single TCR
CGAGAAGCATATGAGA-1	TRUE	CGAGAAGCATATGAGA-1_contig_2	TRUE	792	TRB	TRBV30*01	TRBD2*02	TRBJ1-6*01	TRBC1*01	TRUE	TRUE	CAWVPLAGSPLHF	TGTGCCTGGGTCCCTCTAGCAGGATCACCCCTCCACTTT	12142	4	clonotype844	clonotype844_consensus_2	single TCR
CGAGAAGGTCGAATCT-1	TRUE	CGAGAAGGTCGAATCT-1_contig_1	TRUE	515	TRA	TRAV9-2*01	None	TRAJ49*01	TRAC*01	TRUE	TRUE	CALQINTGNQFYF	TGTGCTCTGCAGATCAACACCGGTAACCAGTTCTATTTT	8093	3	clonotype845	clonotype845_consensus_1	single TCR
CGAGAAGGTCGAATCT-1	TRUE	CGAGAAGGTCGAATCT-1_contig_2	TRUE	681	TRB	TRBV5-1*01	TRBD2*01	TRBJ1-1*01	TRBC1*01	TRUE	TRUE	CASSLGFAGNTEAFF	TGCGCCAGCAGCTTGGGTTTTGCGGGCAACACTGAAGCTTTCTTT	34310	12	clonotype845	clonotype845_consensus_2	single TCR
CGAGAAGTCAGCTGGC-1	TRUE	CGAGAAGTCAGCTGGC-1_contig_1	TRUE	664	TRB	TRBV4-1*01	TRBD2*01	TRBJ2-5*01	TRBC2*01	TRUE	TRUE	CASSQQFSGIGETQYF	TGCGCCAGCAGCCAACAATTCTCGGGGATCGGAGAGACCCAGTACTTC	22907	7	clonotype847	clonotype847_consensus_2	single TCR
CGAGAAGTCAGCTGGC-1	TRUE	CGAGAAGTCAGCTGGC-1_contig_2	TRUE	536	TRA	TRAV36/DV7*01	None	TRAJ42*01	TRAC*01	TRUE	TRUE	CAVGGQGNLIF	TGTGCTGTGGGAGGCCAAGGAAATCTCATCTTT	3633	1	clonotype847	clonotype847_consensus_1	single TCR
CGAGCACAGAAACGCC-1	TRUE	CGAGCACAGAAACGCC-1_contig_1	TRUE	587	TRA	TRAV27*01	None	TRAJ49*01	TRAC*01	TRUE	TRUE	CAGAGGNQFYF	TGTGCAGGAGCAGGGGGTAACCAGTTCTATTTT	4407	1	clonotype848	clonotype848_consensus_2	single TCR
CGAGCACAGAAACGCC-1	TRUE	CGAGCACAGAAACGCC-1_contig_2	TRUE	710	TRB	TRBV5-5*01	None	TRBJ1-1*01	TRBC1*01	TRUE	TRUE	CASSFLMWSEAFF	TGTGCCAGCAGCTTTTTAATGTGGAGTGAAGCTTTCTTT	2348	1	clonotype848	clonotype848_consensus_1	single TCR
CGAGCACAGCGCCTTG-1	TRUE	CGAGCACAGCGCCTTG-1_contig_1	TRUE	699	TRB	TRBV27*01	TRBD1*01	TRBJ2-7*01	TRBC2*01	TRUE	TRUE	CASSRLSLGGQGFHEQYF	TGTGCCAGCAGTAGGCTTTCATTGGGAGGACAGGGTTTCCACGAGCAGTACTTC	9224	3	clonotype850	clonotype850_consensus_2	single TCR
CGAGCACAGCGCCTTG-1	TRUE	CGAGCACAGCGCCTTG-1_contig_3	TRUE	478	TRA	TRAV24*01	None	TRAJ13*02	TRAC*01	TRUE	TRUE	CGDSGGYQKVTF	TGTGGGGATTCTGGGGGTTACCAGAAAGTTACCTTT	10403	3	clonotype850	clonotype850_consensus_1	single TCR
CGAGCCACACGAAGCA-1	TRUE	CGAGCCACACGAAGCA-1_contig_1	TRUE	711	TRB	TRBV6-5*01	None	TRBJ1-2*01	TRBC1*01	TRUE	TRUE	CASSYSSSHYGYTF	TGTGCCAGCAGTTACTCATCTAGTCACTATGGCTACACCTTC	10671	5	clonotype856	clonotype856_consensus_2	single TCR
CGAGCCACACGAAGCA-1	TRUE	CGAGCCACACGAAGCA-1_contig_4	TRUE	717	TRA	TRAV14/DV4*02	None	TRAJ43*01	TRAC*01	TRUE	TRUE	CAMREGYDMRF	TGTGCAATGAGAGAGGGCTATGACATGCGCTTT	2512	2	clonotype856	clonotype856_consensus_1	single TCR
CGAGCCAGTTGAGGTG-1	TRUE	CGAGCCAGTTGAGGTG-1_contig_1	TRUE	694	TRB	TRBV2*01	TRBD2*02	TRBJ2-3*01	TRBC2*01	TRUE	TRUE	CASSGRELDTQYF	TGTGCCAGCAGTGGGCGGGAATTAGATACGCAGTATTTT	10395	3	clonotype857	clonotype857_consensus_2	single TCR
CGAGCCAGTTGAGGTG-1	TRUE	CGAGCCAGTTGAGGTG-1_contig_2	TRUE	554	TRA	TRAV13-1*01	None	TRAJ48*01	TRAC*01	TRUE	TRUE	CAASIKIWRHFGNEKLTF	TGTGCAGCAAGTATTAAAATATGGCGGCACTTTGGAAATGAGAAATTAACCTTT	4677	1	clonotype857	clonotype857_consensus_1	single TCR
CGATCGGTCGTGACAT-1	TRUE	CGATCGGTCGTGACAT-1_contig_2	TRUE	651	TRB	TRBV19*01	None	TRBJ2-7*01	TRBC2*01	TRUE	TRUE	CASSKGYEQYF	TGTGCCAGTAGTAAAGGTTACGAGCAGTACTTC	2503	1	clonotype859	clonotype859_consensus_1	single TCR
CGATCGGTCGTGACAT-1	TRUE	CGATCGGTCGTGACAT-1_contig_3	TRUE	554	TRA	TRAV26-1*01	None	TRAJ24*02	TRAC*01	TRUE	TRUE	CIVRVAATDSWGKLQF	TGCATCGTCAGAGTCGCGGCAACTGACAGCTGGGGGAAATTGCAGTTT	3629	1	clonotype859	clonotype859_consensus_2	single TCR
CGATGGCAGTCGATAA-1	TRUE	CGATGGCAGTCGATAA-1_contig_1	TRUE	663	TRA	TRAV8-3*01	None	TRAJ32*01	TRAC*01	TRUE	TRUE	CDANKLIF	TGTGACGCAAACAAGCTCATCTTT	7075	2	clonotype862	clonotype862_consensus_2	single TCR
CGATGGCAGTCGATAA-1	TRUE	CGATGGCAGTCGATAA-1_contig_2	TRUE	537	TRB	TRBV7-3*01	TRBD2*01	TRBJ2-6*01	TRBC2*01	TRUE	TRUE	CASSFPQAGTGSGANVLTF	TGTGCCAGCAGCTTCCCACAAGCGGGTACAGGTTCTGGGGCCAACGTCCTGACTTTC	6587	2	clonotype862	clonotype862_consensus_1	single TCR
CGATGGCAGTGAAGAG-1	TRUE	CGATGGCAGTGAAGAG-1_contig_1	TRUE	697	TRB	TRBV12-4*01	None	TRBJ2-7*01	TRBC2*01	TRUE	TRUE	CASTGYSGHYEQYF	TGTGCCAGCACCGGATACTCGGGCCACTACGAGCAGTACTTC	7142	3	clonotype863	clonotype863_consensus_2	single TCR
CGATGGCAGTGAAGAG-1	TRUE	CGATGGCAGTGAAGAG-1_contig_3	TRUE	546	TRA	TRAV14/DV4*01	None	TRAJ16*01	TRAC*01	TRUE	TRUE	CAMRRGRF	TGTGCAATGAGGCGGGGGAGGTTT	3392	1	clonotype863	clonotype863_consensus_1	single TCR
CGATGTAAGCTGTCTA-1	TRUE	CGATGTAAGCTGTCTA-1_contig_1	TRUE	575	TRA	TRAV14/DV4*02	None	TRAJ23*01	TRAC*01	TRUE	TRUE	CAMNGRNQGGKLIF	TGTGCAATGAACGGTAGAAACCAGGGAGGAAAGCTTATCTTC	10641	3	clonotype865	clonotype865_consensus_2	single TCR
CGATGTAAGCTGTCTA-1	TRUE	CGATGTAAGCTGTCTA-1_contig_2	TRUE	702	TRB	TRBV6-5*01	TRBD2*01	TRBJ2-7*01	TRBC2*01	TRUE	TRUE	CASRAQSGSVYYEQYF	TGTGCCAGCAGGGCACAATCGGGGTCCGTTTACTACGAGCAGTACTTC	10199	3	clonotype865	clonotype865_consensus_1	single TCR
CGATTGAAGAAGGTGA-1	TRUE	CGATTGAAGAAGGTGA-1_contig_1	TRUE	681	TRB	TRBV5-1*01	None	TRBJ2-5*01	TRBC2*01	TRUE	TRUE	CASSLEPQEGTQYF	TGCGCCAGCAGCTTGGAGCCCCAAGAAGGGACCCAGTACTTC	14847	6	clonotype870	clonotype870_consensus_1	single TCR
CGATTGAAGAAGGTGA-1	TRUE	CGATTGAAGAAGGTGA-1_contig_2	TRUE	513	TRA	TRAV20*01	None	TRAJ50*01	TRAC*01	TRUE	TRUE	CAVQHKTSYDKVIF	TGTGCTGTGCAACATAAAACCTCCTACGACAAGGTGATATTT	4209	1	clonotype870	clonotype870_consensus_2	single TCR
CGATTGATCGTAGGAG-1	TRUE	CGATTGATCGTAGGAG-1_contig_1	TRUE	695	TRB	TRBV7-6*01	TRBD1*01	TRBJ2-1*01	TRBC2*01	TRUE	TRUE	CASSTRTGTAYNEQFF	TGTGCCAGCAGCACGCGGACAGGGACGGCCTACAATGAGCAGTTCTTC	17015	5	clonotype873	clonotype873_consensus_1	single TCR
CGATTGATCGTAGGAG-1	TRUE	CGATTGATCGTAGGAG-1_contig_3	TRUE	534	TRA	TRAV26-1*01	None	TRAJ44*01	TRAC*01	TRUE	TRUE	CIVRVPPTGTASKLTF	TGCATCGTCAGAGTCCCACCTACCGGCACTGCCAGTAAACTCACCTTT	4327	1	clonotype873	clonotype873_consensus_2	single TCR
CGCCAAGAGATAGCAT-1	TRUE	CGCCAAGAGATAGCAT-1_contig_1	TRUE	481	TRA	TRAV21*01	None	TRAJ49*01	TRAC*01	TRUE	TRUE	CAVYGTGNQFYF	TGTGCTGTGTACGGAACCGGTAACCAGTTCTATTTT	4369	1	clonotype874	clonotype874_consensus_2	single TCR
CGCCAAGAGATAGCAT-1	TRUE	CGCCAAGAGATAGCAT-1_contig_2	TRUE	649	TRB	TRBV28*01	TRBD1*01	TRBJ2-7*01	TRBC2*01	TRUE	TRUE	CASSSQQGGSYEQYF	TGTGCCAGCAGTTCCCAACAGGGGGGATCCTACGAGCAGTACTTC	7452	2	clonotype874	clonotype874_consensus_1	single TCR
CGCCAAGGTAAACCTC-1	TRUE	CGCCAAGGTAAACCTC-1_contig_2	TRUE	532	TRB	TRBV6-1*01	TRBD2*02	TRBJ2-7*01	TRBC2*01	TRUE	TRUE	CASLMTSGRPLTSYEQYF	TGTGCCAGCCTTATGACTAGCGGGAGGCCCCTAACATCGTACGAGCAGTACTTC	2875	1	clonotype876	clonotype876_consensus_2	single TCR
CGCCAAGGTAAACCTC-1	TRUE	CGCCAAGGTAAACCTC-1_contig_3	TRUE	482	TRA	TRAV1-1*01	None	TRAJ30*01	TRAC*01	TRUE	TRUE	CAVRDDKIIF	TGCGCTGTTAGAGATGACAAGATCATCTTT	4836	2	clonotype876	clonotype876_consensus_1	single TCR
CGCCAAGGTCAAGCGA-1	TRUE	CGCCAAGGTCAAGCGA-1_contig_1	TRUE	842	TRB	TRBV30*01	TRBD2*02	TRBJ2-7*01	TRBC2*01	TRUE	TRUE	CAWSMKPSWREISYEQYF	TGTGCCTGGAGTATGAAGCCCTCCTGGCGGGAGATTTCCTACGAGCAGTACTTC	6125	4	clonotype878	clonotype878_consensus_1	single TCR
CGCCAAGGTCAAGCGA-1	TRUE	CGCCAAGGTCAAGCGA-1_contig_4	TRUE	494	TRA	TRAV4*01	None	TRAJ5*01	TRAC*01	TRUE	TRUE	CLVGAAMDTGRRALTF	TGCCTCGTGGGTGCCGCCATGGACACGGGCAGGAGAGCACTTACTTTT	4159	1	clonotype878	clonotype878_consensus_2	single TCR
CGCGGTACAATAACGA-1	TRUE	CGCGGTACAATAACGA-1_contig_1	TRUE	561	TRA	TRAV12-3*01	None	TRAJ37*01	TRAC*01	TRUE	TRUE	CAMSGDSGNTGKLIF	TGTGCAATGAGCGGGGACTCTGGCAACACAGGCAAACTAATCTTT	3025	1	clonotype886	clonotype886_consensus_1	single TCR
CGCGGTACAATAACGA-1	TRUE	CGCGGTACAATAACGA-1_contig_2	TRUE	682	TRB	TRBV12-4*01	TRBD1*01	TRBJ1-2*01	TRBC1*01	TRUE	TRUE	CASSLEAGTGYTF	TGTGCCAGCAGTTTAGAGGCCGGGACTGGCTACACCTTC	6428	2	clonotype886	clonotype886_consensus_2	single TCR
CGCGGTATCCCAGGTG-1	TRUE	CGCGGTATCCCAGGTG-1_contig_1	TRUE	831	TRB	TRBV5-6*01	TRBD1*01	TRBJ1-1*01	TRBC1*01	TRUE	TRUE	CASSFQGVRSEAFF	TGTGCCAGCAGCTTCCAGGGCGTTAGGTCGGAAGCTTTCTTT	8344	3	clonotype887	clonotype887_consensus_2	single TCR
CGCGGTATCCCAGGTG-1	TRUE	CGCGGTATCCCAGGTG-1_contig_3	TRUE	592	TRA	TRAV41*01	None	TRAJ35*01	TRAC*01	TRUE	TRUE	CAVPGRSFGNVLHC	TGTGCTGTCCCAGGGAGGAGCTTTGGGAATGTGCTGCATTGC	3808	1	clonotype887	clonotype887_consensus_1	single TCR
CGCTATCCAGACGCAA-1	TRUE	CGCTATCCAGACGCAA-1_contig_1	TRUE	508	TRA	TRAV38-2/DV8*01	None	TRAJ40*01	TRAC*01	TRUE	TRUE	CAYRSAGGTYKYIF	TGTGCTTATAGGAGCGCGGGAGGAACCTACAAATACATCTTT	17945	5	clonotype893	clonotype893_consensus_1	single TCR
CGCTATCCAGACGCAA-1	TRUE	CGCTATCCAGACGCAA-1_contig_2	TRUE	478	TRB	TRBV28*01	TRBD2*02	TRBJ2-5*01	TRBC2*01	TRUE	TRUE	CASNGLAGVETQYF	TGTGCCAGCAATGGACTAGCGGGAGTAGAGACCCAGTACTTC	3695	2	clonotype893	clonotype893_consensus_2	single TCR
CGCTATCCATATACCG-1	TRUE	CGCTATCCATATACCG-1_contig_1	TRUE	602	TRB	TRBV7-2*01	TRBD1*01	TRBJ1-2*01	TRBC1*01	TRUE	TRUE	CASSTGGQLIYGYTF	TGTGCCAGCAGCACGGGGGGACAGCTTATCTATGGCTACACCTTC	8364	3	clonotype894	clonotype894_consensus_1	single TCR
CGCTATCCATATACCG-1	TRUE	CGCTATCCATATACCG-1_contig_2	TRUE	562	TRA	TRAV5*01	None	TRAJ26*01	TRAC*01	TRUE	TRUE	CAERDYGQNFVF	TGTGCAGAGCGGGACTATGGTCAGAATTTTGTCTTT	3534	2	clonotype894	clonotype894_consensus_2	single TCR
CGCTATCTCATCTGTT-1	TRUE	CGCTATCTCATCTGTT-1_contig_2	TRUE	624	TRB	TRBV20-1*02	TRBD1*01	TRBJ1-2*01	TRBC1*01	TRUE	TRUE	CSAREGTGHNYGYTF	TGCAGTGCTAGAGAAGGGACAGGGCATAACTATGGCTACACCTTC	2928	1	clonotype895	clonotype895_consensus_2	single TCR
CGCTATCTCATCTGTT-1	TRUE	CGCTATCTCATCTGTT-1_contig_3	TRUE	511	TRA	TRAV5*01	None	TRAJ42*01	TRAC*01	TRUE	TRUE	CAEMGLGGSQGNLIF	TGTGCAGAGATGGGCTTAGGAGGAAGCCAAGGAAATCTCATCTTT	3479	1	clonotype895	clonotype895_consensus_1	single TCR
CGCTATCTCCACGTTC-1	TRUE	CGCTATCTCCACGTTC-1_contig_1	TRUE	689	TRB	TRBV12-3*01	TRBD2*02	TRBJ2-5*01	TRBC2*01	TRUE	TRUE	CASSPGRVGETQYF	TGTGCCAGCAGTCCCGGGAGGGTTGGAGAGACCCAGTACTTC	65397	24	clonotype896	clonotype896_consensus_1	single TCR
CGCTATCTCCACGTTC-1	TRUE	CGCTATCTCCACGTTC-1_contig_2	TRUE	584	TRA	TRAV14/DV4*01	None	TRAJ11*01	TRAC*01	TRUE	TRUE	CAMRGGGYSTLTF	TGTGCAATGAGAGGAGGGGGATACAGCACCCTCACCTTT	15233	4	clonotype896	clonotype896_consensus_2	single TCR
CGCTATCTCTGCTGTC-1	TRUE	CGCTATCTCTGCTGTC-1_contig_1	TRUE	646	TRB	TRBV28*01	TRBD1*01	TRBJ1-1*01	TRBC1*01	TRUE	TRUE	CASSLLSRASEAFF	TGTGCCAGCAGTTTATTGAGCAGGGCGTCTGAAGCTTTCTTT	7400	4	clonotype898	clonotype898_consensus_1	single TCR
CGCTATCTCTGCTGTC-1	TRUE	CGCTATCTCTGCTGTC-1_contig_2	TRUE	474	TRA	TRAV9-2*01	None	TRAJ31*01	TRAC*01	TRUE	TRUE	CALSGLLNNARLMF	TGTGCTCTGAGCGGCCTTCTAAACAATGCCAGACTCATGTTT	4423	1	clonotype898	clonotype898_consensus_2	single TCR
CGCTGGAAGAATTGTG-1	TRUE	CGCTGGAAGAATTGTG-1_contig_1	TRUE	765	TRB	TRBV18*01	None	TRBJ1-1*01	TRBC1*01	TRUE	TRUE	CASSPTPPLNTEAFF	TGTGCCAGCTCACCCACGCCCCCCTTGAACACTGAAGCTTTCTTT	40575	15	clonotype899	clonotype899_consensus_2	single TCR
CGCTGGAAGAATTGTG-1	TRUE	CGCTGGAAGAATTGTG-1_contig_3	TRUE	529	TRA	TRAV21*01	None	TRAJ28*01	TRAC*01	TRUE	TRUE	CAEQPYSGAGSYQLTF	TGTGCTGAGCAACCATACTCTGGGGCTGGGAGTTACCAACTCACTTTC	4190	1	clonotype899	clonotype899_consensus_1	single TCR
CGCTGGAAGTACGCGA-1	TRUE	CGCTGGAAGTACGCGA-1_contig_1	TRUE	679	TRB	TRBV5-1*01	TRBD2*01	TRBJ2-5*01	TRBC2*01	TRUE	TRUE	CASSNRDYQETQYF	TGCGCCAGCAGCAACCGGGACTATCAAGAGACCCAGTACTTC	12462	4	clonotype900	clonotype900_consensus_2	single TCR
CGCTGGAAGTACGCGA-1	TRUE	CGCTGGAAGTACGCGA-1_contig_4	TRUE	531	TRA	TRAV25*01	None	TRAJ40*01	TRAC*01	TRUE	TRUE	CAAGTYKYIF	TGTGCAGCAGGAACCTACAAATACATCTTT	2614	1	clonotype900	clonotype900_consensus_1	single TCR
CGCTGGACAGGCTGAA-1	TRUE	CGCTGGACAGGCTGAA-1_contig_1	TRUE	704	TRB	TRBV7-2*02	TRBD1*01	TRBJ1-5*01	TRBC1*01	TRUE	TRUE	CASSLAAGQVQPQHF	TGTGCCAGCAGCTTAGCGGCAGGGCAGGTACAGCCCCAGCATTTT	11644	4	clonotype902	clonotype902_consensus_1	single TCR
CGCTGGACAGGCTGAA-1	TRUE	CGCTGGACAGGCTGAA-1_contig_4	TRUE	562	TRA	TRAV12-3*01	None	TRAJ6*01	TRAC*01	TRUE	TRUE	CAFLSGGSYIPTF	TGTGCATTCCTATCAGGAGGAAGCTACATACCTACATTT	1661	1	clonotype902	clonotype902_consensus_2	single TCR
CGCTGGAGTCCCGACA-1	TRUE	CGCTGGAGTCCCGACA-1_contig_1	TRUE	527	TRA	TRAV21*01	None	TRAJ44*01	TRAC*01	TRUE	TRUE	CAVRGNTGTASKLTF	TGTGCTGTGAGGGGAAATACCGGCACTGCCAGTAAACTCACCTTT	5139	2	clonotype904	clonotype904_consensus_1	single TCR
CGCTGGAGTCCCGACA-1	TRUE	CGCTGGAGTCCCGACA-1_contig_3	TRUE	695	TRB	TRBV4-1*01	TRBD2*01	TRBJ2-1*01	TRBC2*01	TRUE	TRUE	CASSQVRTSYNEQFF	TGCGCCAGCAGCCAAGTGAGGACTTCCTACAATGAGCAGTTCTTC	23046	8	clonotype904	clonotype904_consensus_2	single TCR
CGCTTCACACTAGTAC-1	TRUE	CGCTTCACACTAGTAC-1_contig_1	TRUE	475	TRA	TRAV30*01	None	TRAJ28*01	TRAC*01	TRUE	TRUE	CGPGGWELPTHF	TGTGGCCCAGGGGGCTGGGAGTTACCAACTCACTTT	4103	1	clonotype910	clonotype910_consensus_2	single TCR
CGCTTCACACTAGTAC-1	TRUE	CGCTTCACACTAGTAC-1_contig_3	TRUE	696	TRB	TRBV11-2*03	TRBD2*01	TRBJ2-5*01	TRBC2*01	TRUE	TRUE	CASSLLAGALKETQYF	TGTGCCAGCAGCTTATTAGCGGGGGCGCTCAAAGAGACCCAGTACTTC	19596	7	clonotype910	clonotype910_consensus_1	single TCR
CGCTTCATCCCGACTT-1	TRUE	CGCTTCATCCCGACTT-1_contig_1	TRUE	693	TRB	TRBV7-7*01	TRBD1*01	TRBJ2-5*01	TRBC2*01	TRUE	TRUE	CASSARQGAPETQYF	TGTGCCAGCAGTGCAAGGCAGGGGGCTCCAGAGACCCAGTACTTC	3222	2	clonotype911	clonotype911_consensus_2	single TCR
CGCTTCATCCCGACTT-1	TRUE	CGCTTCATCCCGACTT-1_contig_5	TRUE	572	TRA	TRAV6*01	None	TRAJ22*01	TRAC*01	TRUE	TRUE	CALDPLGSGSARQLTF	TGTGCTCTAGACCCCTTGGGTTCTGGTTCTGCAAGGCAACTGACCTTT	4061	1	clonotype911	clonotype911_consensus_1	single TCR
CGGACACGTTACAGAA-1	TRUE	CGGACACGTTACAGAA-1_contig_1	TRUE	811	TRB	TRBV6-6*01	TRBD2*02	TRBJ2-2*01	TRBC2*01	TRUE	TRUE	CASMPREENTGELFF	TGTGCCAGCATGCCGCGGGAGGAAAACACCGGGGAGCTGTTTTTT	15136	5	clonotype914	clonotype914_consensus_2	single TCR
CGGACACGTTACAGAA-1	TRUE	CGGACACGTTACAGAA-1_contig_3	TRUE	651	TRA	TRAV8-4*01	None	TRAJ40*01	TRAC*01	TRUE	TRUE	CAVSSSGTYKYIF	TGTGCTGTGAGCTCGTCAGGAACCTACAAATACATCTTT	5571	2	clonotype914	clonotype914_consensus_1	single TCR
CGGACGTAGTTGTCGT-1	TRUE	CGGACGTAGTTGTCGT-1_contig_1	TRUE	699	TRB	TRBV3-1*01	TRBD2*01	TRBJ2-1*01	TRBC2*01	TRUE	TRUE	CASSPLLAGGPGEQFF	TGTGCCAGCAGCCCCCTTCTAGCGGGGGGGCCCGGTGAGCAGTTCTTC	4538	3	clonotype916	clonotype916_consensus_2	single TCR
CGGACGTAGTTGTCGT-1	TRUE	CGGACGTAGTTGTCGT-1_contig_2	TRUE	488	TRA	TRAV1-1*01	None	TRAJ15*01	TRAC*01	TRUE	TRUE	CAVKRDGGTALIF	TGCGCTGTGAAAAGGGATGGAGGAACTGCTCTGATCTTT	3410	1	clonotype916	clonotype916_consensus_1	single TCR
CGGACGTGTGTGCGTC-1	TRUE	CGGACGTGTGTGCGTC-1_contig_1	TRUE	738	TRB	TRBV2*01	None	TRBJ2-2*01	TRBC2*01	TRUE	TRUE	CASTVSDPYTGELFF	TGTGCCAGCACTGTCTCAGACCCCTACACCGGGGAGCTGTTTTTT	12340	5	clonotype918	clonotype918_consensus_2	single TCR
CGGACGTGTGTGCGTC-1	TRUE	CGGACGTGTGTGCGTC-1_contig_3	TRUE	559	TRA	TRAV19*01	None	TRAJ28*01	TRAC*01	TRUE	TRUE	CALNSGAGSYQLTF	TGTGCTCTGAACTCTGGGGCTGGGAGTTACCAACTCACTTTC	1095	1	clonotype918	clonotype918_consensus_1	single TCR
CGGACGTTCCGTCATC-1	TRUE	CGGACGTTCCGTCATC-1_contig_1	TRUE	512	TRB	TRBV28*01	TRBD2*02	TRBJ2-3*01	TRBC2*01	TRUE	TRUE	CASKGGREDTQYF	TGTGCCAGCAAAGGTGGACGGGAAGATACGCAGTATTTT	4044	1	clonotype920	clonotype920_consensus_1	single TCR
CGGACGTTCCGTCATC-1	TRUE	CGGACGTTCCGTCATC-1_contig_3	TRUE	457	TRA	TRAV21*01	None	TRAJ56*01	TRAC*01	TRUE	TRUE	CAVRPYGANSKLTF	TGTGCTGTGAGGCCGTACGGAGCCAATAGTAAGCTGACATTT	4834	1	clonotype920	clonotype920_consensus_2	single TCR
CGGACTGCAGGCTGAA-1	TRUE	CGGACTGCAGGCTGAA-1_contig_1	TRUE	492	TRA	TRAV29/DV5*01	None	TRAJ40*01	TRAC*01	TRUE	TRUE	CAASVLGGTYKYIF	TGTGCAGCAAGCGTCTTAGGAGGAACCTACAAATACATCTTT	4213	1	clonotype921	clonotype921_consensus_2	single TCR
CGGACTGCAGGCTGAA-1	TRUE	CGGACTGCAGGCTGAA-1_contig_2	TRUE	591	TRB	TRBV20-1*02	TRBD2*01	TRBJ2-1*01	TRBC2*01	TRUE	TRUE	CSAGAGYNEQFF	TGCAGTGCTGGAGCGGGTTACAATGAGCAGTTCTTC	16755	5	clonotype921	clonotype921_consensus_1	single TCR
CGGACTGGTTGCGCAC-1	TRUE	CGGACTGGTTGCGCAC-1_contig_1	TRUE	690	TRB	TRBV7-8*01	TRBD1*01	TRBJ2-1*01	TRBC2*01	TRUE	TRUE	CASSLPGQYNEQFF	TGTGCCAGCAGCTTGCCGGGACAATACAATGAGCAGTTCTTC	14237	5	clonotype923	clonotype923_consensus_2	single TCR
CGGACTGGTTGCGCAC-1	TRUE	CGGACTGGTTGCGCAC-1_contig_3	TRUE	472	TRA	TRAV4*01	None	TRAJ17*01	TRAC*01	TRUE	TRUE	CLVRPGNKLTF	TGCCTCGTTAGACCTGGCAACAAGCTAACTTTT	3999	1	clonotype923	clonotype923_consensus_1	single TCR
CGGACTGTCAATCTCT-1	TRUE	CGGACTGTCAATCTCT-1_contig_1	TRUE	534	TRB	TRBV6-1*01	TRBD1*01	TRBJ1-2*01	TRBC1*01	TRUE	TRUE	CASSGGRLWYGYTF	TGTGCCAGCAGTGGGGGACGCCTGTGGTATGGCTACACCTTC	7315	2	clonotype924	clonotype924_consensus_2	single TCR
CGGACTGTCAATCTCT-1	TRUE	CGGACTGTCAATCTCT-1_contig_2	TRUE	535	TRA	TRAV27*01	None	TRAJ33*01	TRAC*01	TRUE	TRUE	CAGEGVDSNYQLIW	TGTGCAGGAGAGGGAGTGGATAGCAACTATCAGTTAATCTGG	3830	1	clonotype924	clonotype924_consensus_1	single TCR
CGGAGCTAGAGGTTAT-1	TRUE	CGGAGCTAGAGGTTAT-1_contig_1	TRUE	522	TRA	TRAV29/DV5*01	None	TRAJ33*01	TRAC*01	TRUE	TRUE	CAASALPDSNYQLIW	TGTGCAGCAAGCGCCCTACCGGATAGCAACTATCAGTTAATCTGG	8164	2	clonotype925	clonotype925_consensus_1	single TCR
CGGAGCTAGAGGTTAT-1	TRUE	CGGAGCTAGAGGTTAT-1_contig_2	TRUE	512	TRB	TRBV6-2*01	TRBD2*01	TRBJ2-7*01	TRBC2*01	TRUE	TRUE	CASSPPRTIPSYEQYF	TGTGCCAGCAGTCCCCCCCGGACTATACCTTCCTACGAGCAGTACTTC	5011	2	clonotype925	clonotype925_consensus_2	single TCR
CGGAGCTCACCTCGGA-1	TRUE	CGGAGCTCACCTCGGA-1_contig_1	TRUE	616	TRA	TRAV8-4*01	None	TRAJ30*01	TRAC*01	TRUE	TRUE	CAVSSNRDDKIIF	TGTGCTGTGAGTTCGAACAGAGATGACAAGATCATCTTT	3716	1	clonotype926	clonotype926_consensus_2	single TCR
CGGAGCTCACCTCGGA-1	TRUE	CGGAGCTCACCTCGGA-1_contig_2	TRUE	659	TRB	TRBV2*01	TRBD1*01	TRBJ1-5*01	TRBC1*01	TRUE	TRUE	CASSALGVSNQPQHF	TGTGCCAGCAGTGCATTAGGGGTGAGCAATCAGCCCCAGCATTTT	6838	2	clonotype926	clonotype926_consensus_1	single TCR
CGGAGCTTCGTTTAGG-1	TRUE	CGGAGCTTCGTTTAGG-1_contig_1	TRUE	666	TRB	TRBV6-5*01	TRBD1*01	TRBJ1-1*01	TRBC1*01	TRUE	TRUE	CASSTGNTEAFF	TGTGCCAGCTCGACAGGGAACACTGAAGCTTTCTTT	7825	4	clonotype928	clonotype928_consensus_1	single TCR
CGGAGCTTCGTTTAGG-1	TRUE	CGGAGCTTCGTTTAGG-1_contig_2	TRUE	739	TRA	TRAV12-2*01	None	TRAJ28*01	TRAC*01	TRUE	TRUE	CAFISGAGSYQLTF	TGTGCCTTCATCTCTGGGGCTGGGAGTTACCAACTCACTTTC	12900	4	clonotype928	clonotype928_consensus_2	single TCR
CGGAGTCAGACAGGCT-1	TRUE	CGGAGTCAGACAGGCT-1_contig_1	TRUE	619	TRB	TRBV30*01	TRBD2*01	TRBJ2-5*01	TRBC2*01	TRUE	TRUE	CAWRRAGETQYF	TGTGCCTGGAGAAGAGCGGGAGAGACCCAGTACTTC	12366	4	clonotype929	clonotype929_consensus_1	single TCR
CGGAGTCAGACAGGCT-1	TRUE	CGGAGTCAGACAGGCT-1_contig_2	TRUE	598	TRA	TRAV29/DV5*01	None	TRAJ53*01	TRAC*01	TRUE	TRUE	CAASVRGSNYKLTF	TGTGCAGCAAGCGTGAGGGGTAGCAACTATAAACTGACATTT	6175	2	clonotype929	clonotype929_consensus_2	single TCR
CGGAGTCCAAGAAGAG-1	TRUE	CGGAGTCCAAGAAGAG-1_contig_1	TRUE	687	TRB	TRBV5-1*01	TRBD1*01	TRBJ2-1*01	TRBC2*01	TRUE	TRUE	CASSPGQGGSYNEQFF	TGCGCCAGCAGCCCGGGACAGGGAGGCTCCTACAATGAGCAGTTCTTC	19647	6	clonotype931	clonotype931_consensus_1	single TCR
CGGAGTCCAAGAAGAG-1	TRUE	CGGAGTCCAAGAAGAG-1_contig_2	TRUE	713	TRA	TRAV8-6*02	None	TRAJ44*01	TRAC*01	TRUE	TRUE	CAVSYTGTASKLTF	TGTGCTGTGAGTTATACCGGCACTGCCAGTAAACTCACCTTT	9468	3	clonotype931	clonotype931_consensus_2	single TCR
CGGAGTCGTCGCATAT-1	TRUE	CGGAGTCGTCGCATAT-1_contig_1	TRUE	503	TRB	TRBV9*01	None	TRBJ1-1*01	TRBC1*01	TRUE	TRUE	CASSARPDFNTEAFF	TGTGCCAGCAGCGCCCGACCCGATTTCAACACTGAAGCTTTCTTT	15507	4	clonotype934	clonotype934_consensus_2	single TCR
CGGAGTCGTCGCATAT-1	TRUE	CGGAGTCGTCGCATAT-1_contig_2	TRUE	521	TRA	TRAV26-1*01	None	TRAJ17*01	TRAC*01	TRUE	TRUE	CIASSKAAGNKLTF	TGCATCGCCAGTAGCAAAGCTGCAGGCAACAAGCTAACTTTT	3836	1	clonotype934	clonotype934_consensus_1	single TCR
CGGAGTCTCAAACAAG-1	TRUE	CGGAGTCTCAAACAAG-1_contig_1	TRUE	732	TRB	TRBV7-6*01	TRBD1*01	TRBJ2-6*01	TRBC2*01	TRUE	TRUE	CASSQTSIPDSSYSGANVLTF	TGTGCCAGCAGCCAAACCTCAATACCGGACAGTTCTTACTCTGGGGCCAACGTCCTGACTTTC	19642	6	clonotype935	clonotype935_consensus_1	single TCR
CGGAGTCTCAAACAAG-1	TRUE	CGGAGTCTCAAACAAG-1_contig_3	TRUE	494	TRA	TRAV3*01	None	TRAJ28*01	TRAC*01	TRUE	TRUE	CAVSPTYSGAGSYQLTF	TGTGCTGTGAGTCCCACATACTCTGGGGCTGGGAGTTACCAACTCACTTTC	4409	1	clonotype935	clonotype935_consensus_2	single TCR
CGGCTAGGTCGCGTGT-1	TRUE	CGGCTAGGTCGCGTGT-1_contig_1	TRUE	694	TRB	TRBV5-1*01	TRBD2*01	TRBJ1-1*01	TRBC1*01	TRUE	TRUE	CASSLGIRGISTEAFF	TGCGCCAGCAGCTTGGGTATCAGAGGGATTAGCACTGAAGCTTTCTTT	6987	3	clonotype937	clonotype937_consensus_1	single TCR
CGGCTAGGTCGCGTGT-1	TRUE	CGGCTAGGTCGCGTGT-1_contig_4	TRUE	706	TRA	TRAV13-2*01	None	TRAJ37*01	TRAC*01	TRUE	TRUE	CAENRVPGSGNTGKLIF	TGTGCAGAGAATCGGGTACCAGGCTCTGGCAACACAGGCAAACTAATCTTT	703	1	clonotype937	clonotype937_consensus_2	single TCR
CGGCTAGTCGCGGATC-1	TRUE	CGGCTAGTCGCGGATC-1_contig_1	TRUE	638	TRA	TRAV8-2*01	None	TRAJ20*01	TRAC*01	TRUE	TRUE	CVVSAIQNDYKLSF	TGTGTTGTGAGCGCCATTCAAAACGACTACAAGCTCAGCTTT	9491	3	clonotype938	clonotype938_consensus_2	single TCR
CGGCTAGTCGCGGATC-1	TRUE	CGGCTAGTCGCGGATC-1_contig_2	TRUE	753	TRB	TRBV4-2*01	TRBD1*01	TRBJ1-5*01	TRBC1*01	TRUE	TRUE	CASSQEAWQGDQPQHF	TGTGCCAGCAGCCAAGAGGCGTGGCAGGGAGATCAGCCCCAGCATTTT	6062	3	clonotype938	clonotype938_consensus_1	single TCR
CGGGTCACAGACGTAG-1	TRUE	CGGGTCACAGACGTAG-1_contig_1	TRUE	690	TRB	TRBV5-1*01	TRBD2*02	TRBJ2-7*01	TRBC2*01	TRUE	TRUE	CASSFDIAGGVSYEQYF	TGCGCCAGCAGCTTCGATATAGCGGGAGGCGTCTCCTACGAGCAGTACTTC	30018	9	clonotype939	clonotype939_consensus_1	single TCR
CGGGTCACAGACGTAG-1	TRUE	CGGGTCACAGACGTAG-1_contig_2	TRUE	603	TRA	TRAV41*01	None	TRAJ49*01	TRAC*01	TRUE	TRUE	CAVTGNQFYF	TGTGCTGTCACCGGTAACCAGTTCTATTTT	459	1	clonotype939	clonotype939_consensus_2	single TCR
CGGGTCAGTCTCGTTC-1	TRUE	CGGGTCAGTCTCGTTC-1_contig_1	TRUE	836	TRB	TRBV5-6*01	TRBD1*01	TRBJ2-7*01	TRBC2*01	TRUE	TRUE	CASSHGQSYEQYF	TGTGCCAGCAGCCACGGACAATCCTACGAGCAGTACTTC	13030	4	clonotype941	clonotype941_consensus_2	single TCR
CGGGTCAGTCTCGTTC-1	TRUE	CGGGTCAGTCTCGTTC-1_contig_3	TRUE	474	TRA	TRAV9-2*01	None	TRAJ28*01	TRAC*01	TRUE	TRUE	CLAYSGAGSYQLTF	TGTCTCGCCTACTCTGGGGCTGGGAGTTACCAACTCACTTTC	2014	1	clonotype941	clonotype941_consensus_1	single TCR
CGGTTAACAATACGCT-1	TRUE	CGGTTAACAATACGCT-1_contig_1	TRUE	724	TRA	TRAV8-3*01	None	TRAJ43*01	TRAC*01	TRUE	TRUE	CAVNDMRF	TGTGCTGTGAATGACATGCGCTTT	2111	1	clonotype943	clonotype943_consensus_2	single TCR
CGGTTAACAATACGCT-1	TRUE	CGGTTAACAATACGCT-1_contig_2	TRUE	520	TRB	TRBV20-1*02	TRBD1*01	TRBJ2-7*01	TRBC2*01	TRUE	TRUE	CSAHQGSYEQYF	TGCAGTGCTCACCAGGGGTCCTACGAGCAGTACTTC	3163	1	clonotype943	clonotype943_consensus_1	single TCR
CGGTTAACATAAGACA-1	TRUE	CGGTTAACATAAGACA-1_contig_1	TRUE	622	TRB	TRBV6-6*02	None	TRBJ2-7*01	TRBC2*01	TRUE	TRUE	CASSYRDKYEQYF	TGTGCCAGCAGTTACCGAGATAAATACGAGCAGTACTTC	7253	2	clonotype944	clonotype944_consensus_1	single TCR
CGGTTAACATAAGACA-1	TRUE	CGGTTAACATAAGACA-1_contig_2	TRUE	494	TRA	TRAV13-2*01	None	TRAJ30*01	TRAC*01	TRUE	TRUE	CAEIGDRDDKIIF	TGTGCAGAGATAGGGGACAGAGATGACAAGATCATCTTT	3804	1	clonotype944	clonotype944_consensus_2	single TCR
CGTAGCGCACCAGTTA-1	TRUE	CGTAGCGCACCAGTTA-1_contig_1	TRUE	696	TRB	TRBV27*01	TRBD1*01	TRBJ1-2*01	TRBC1*01	TRUE	TRUE	CASKQGPGLKDYGYTF	TGTGCCAGCAAACAGGGACCGGGCCTAAAGGATTATGGCTACACCTTC	9016	3	clonotype949	clonotype949_consensus_1	single TCR
CGTAGCGCACCAGTTA-1	TRUE	CGTAGCGCACCAGTTA-1_contig_3	TRUE	716	TRA	TRAV8-6*01	None	TRAJ38*01	TRAC*01	TRUE	TRUE	CAVSLNAGNNRKLIW	TGTGCTGTGAGTCTTAATGCTGGCAACAACCGTAAGCTGATTTGG	3630	2	clonotype949	clonotype949_consensus_2	single TCR
CGTAGGCAGGTGGGTT-1	TRUE	CGTAGGCAGGTGGGTT-1_contig_1	TRUE	637	TRA	TRAV25*01	None	TRAJ52*01	TRAC*01	TRUE	TRUE	CAGPAGGTSYGKLTF	TGTGCAGGGCCTGCTGGTGGTACTAGCTATGGAAAGCTGACATTT	3183	2	clonotype952	clonotype952_consensus_1	single TCR
CGTAGGCAGGTGGGTT-1	TRUE	CGTAGGCAGGTGGGTT-1_contig_2	TRUE	518	TRB	TRBV7-2*02	None	TRBJ1-1*01	TRBC1*01	TRUE	TRUE	CASSLVIHLGTEAFF	TGTGCCAGCAGCTTAGTAATCCACCTAGGGACTGAAGCTTTCTTT	13229	5	clonotype952	clonotype952_consensus_2	single TCR
CGTAGGCAGTGTTAGA-1	TRUE	CGTAGGCAGTGTTAGA-1_contig_1	TRUE	518	TRA	TRAV38-2/DV8*01	None	TRAJ50*01	TRAC*01	TRUE	TRUE	CAYTRTSYDKVIF	TGTGCTTATACGCGGACCTCCTACGACAAGGTGATATTT	5316	3	clonotype953	clonotype953_consensus_2	single TCR
CGTAGGCAGTGTTAGA-1	TRUE	CGTAGGCAGTGTTAGA-1_contig_2	TRUE	519	TRB	TRBV5-1*01	None	TRBJ1-1*01	TRBC1*01	TRUE	TRUE	CASSLDSLNTEAFF	TGCGCCAGCAGCTTGGACAGCTTGAACACTGAAGCTTTCTTT	4591	2	clonotype953	clonotype953_consensus_1	single TCR
CGTAGGCCAGCTGCAC-1	TRUE	CGTAGGCCAGCTGCAC-1_contig_1	TRUE	546	TRB	TRBV2*01	TRBD1*01	TRBJ1-5*01	TRBC1*01	TRUE	TRUE	CASSGQGNQPQHF	TGTGCCAGCAGTGGACAGGGGAATCAGCCCCAGCATTTT	10825	4	clonotype954	clonotype954_consensus_1	single TCR
CGTAGGCCAGCTGCAC-1	TRUE	CGTAGGCCAGCTGCAC-1_contig_3	TRUE	511	TRA	TRAV13-1*01	None	TRAJ32*02	TRAC*01	TRUE	TRUE	CAACYGGATNKLIF	TGTGCAGCCTGTTATGGTGGTGCTACAAACAAGCTCATCTTT	2844	1	clonotype954	clonotype954_consensus_2	single TCR
CGTCACTCATCTACGA-1	TRUE	CGTCACTCATCTACGA-1_contig_1	TRUE	838	TRB	TRBV4-1*01	None	TRBJ2-2*01	TRBC1*01	TRUE	TRUE	CASSRATGELFF	TGCGCCAGCAGCCGGGCTACCGGGGAGCTGTTTTTT	15443	5	clonotype958	clonotype958_consensus_2	single TCR
CGTCACTCATCTACGA-1	TRUE	CGTCACTCATCTACGA-1_contig_3	TRUE	504	TRA	TRAV17*01	None	TRAJ45*01	TRAC*01	TRUE	TRUE	CATDQGADGLTF	TGTGCTACGGACCAAGGTGCTGACGGACTCACCTTT	2139	1	clonotype958	clonotype958_consensus_1	single TCR
CGTCACTTCTCCGGTT-1	TRUE	CGTCACTTCTCCGGTT-1_contig_1	TRUE	706	TRB	TRBV20-1*02	TRBD1*01	TRBJ1-1*01	TRBC1*01	TRUE	TRUE	CSAEHRDRNTEAFF	TGCAGTGCCGAACACCGGGACAGGAACACTGAAGCTTTCTTT	26509	8	clonotype960	clonotype960_consensus_1	single TCR
CGTCACTTCTCCGGTT-1	TRUE	CGTCACTTCTCCGGTT-1_contig_2	TRUE	522	TRA	TRAV13-1*01	None	TRAJ24*02	TRAC*01	TRUE	TRUE	CAATDSWGKLQF	TGTGCAGCAACTGACAGCTGGGGGAAATTGCAGTTT	7144	2	clonotype960	clonotype960_consensus_2	single TCR
CGTCACTTCTGATTCT-1	TRUE	CGTCACTTCTGATTCT-1_contig_1	TRUE	848	TRB	TRBV30*01	TRBD1*01	TRBJ2-3*01	TRBC2*01	TRUE	TRUE	CAWRLTGVDTQYF	TGTGCCTGGAGGCTGACAGGGGTCGATACGCAGTATTTT	15370	5	clonotype961	clonotype961_consensus_1	single TCR
CGTCACTTCTGATTCT-1	TRUE	CGTCACTTCTGATTCT-1_contig_2	TRUE	691	TRA	TRAV8-3*01	None	TRAJ53*01	TRAC*01	TRUE	TRUE	CAVGAAGGGSNYKLTF	TGTGCTGTGGGTGCAGCTGGAGGAGGTAGCAACTATAAACTGACATTT	6462	2	clonotype961	clonotype961_consensus_2	single TCR
CGTCCATAGCGATAGC-1	TRUE	CGTCCATAGCGATAGC-1_contig_1	TRUE	543	TRB	TRBV7-9*01	None	TRBJ2-2*01	TRBC2*01	TRUE	TRUE	CASSFAGTGELFF	TGTGCCAGCAGCTTCGCGGGCACCGGGGAGCTGTTTTTT	10640	3	clonotype963	clonotype963_consensus_2	single TCR
CGTCCATAGCGATAGC-1	TRUE	CGTCCATAGCGATAGC-1_contig_2	TRUE	656	TRA	TRAV8-2*01	None	TRAJ43*01	TRAC*01	TRUE	TRUE	CVVRGLGNNNDMRF	TGTGTTGTGAGAGGTCTGGGCAATAACAATGACATGCGCTTT	2487	1	clonotype963	clonotype963_consensus_1	single TCR
CGTCCATGTACTCAAC-1	TRUE	CGTCCATGTACTCAAC-1_contig_1	TRUE	515	TRB	TRBV28*01	TRBD2*02	TRBJ2-7*01	TRBC2*01	TRUE	TRUE	CASSFQAGAYEQYF	TGTGCCAGCAGTTTCCAAGCGGGAGCGTACGAGCAGTACTTC	6240	2	clonotype966	clonotype966_consensus_1	single TCR
CGTCCATGTACTCAAC-1	TRUE	CGTCCATGTACTCAAC-1_contig_2	TRUE	540	TRA	TRAV13-1*01	None	TRAJ33*01	TRAC*01	TRUE	TRUE	CAASSDSNYQLIW	TGTGCAGCAAGTAGCGATAGCAACTATCAGTTAATCTGG	1959	1	clonotype966	clonotype966_consensus_2	single TCR
CGTCCATGTTCTGTTT-1	TRUE	CGTCCATGTTCTGTTT-1_contig_1	TRUE	488	TRA	TRAV4*01	None	TRAJ30*01	TRAC*01	TRUE	TRUE	CLVEGRDDKIIF	TGCCTCGTGGAGGGCAGAGATGACAAGATCATCTTT	3365	1	clonotype967	clonotype967_consensus_1	single TCR
CGTCCATGTTCTGTTT-1	TRUE	CGTCCATGTTCTGTTT-1_contig_2	TRUE	700	TRB	TRBV2*01	None	TRBJ2-5*01	TRBC2*01	TRUE	TRUE	CASSEPGPLETQYF	TGTGCCAGCAGTGAACCAGGCCCCCTGGAGACCCAGTACTTC	13754	7	clonotype967	clonotype967_consensus_2	single TCR
CGTCTACCACTATCTT-1	TRUE	CGTCTACCACTATCTT-1_contig_1	TRUE	728	TRB	TRBV20-1*02	TRBD2*01	TRBJ1-4*01	TRBC1*01	TRUE	TRUE	CSARVLARHLTNEKLFF	TGCAGTGCTAGAGTTCTAGCCCGACATCTAACTAATGAAAAACTGTTTTTT	6847	2	clonotype971	clonotype971_consensus_1	single TCR
CGTCTACCACTATCTT-1	TRUE	CGTCTACCACTATCTT-1_contig_4	TRUE	509	TRA	TRAV4*01	None	TRAJ13*02	TRAC*01	TRUE	TRUE	CLVVTFNSGGYQKVTF	TGCCTCGTGGTGACGTTCAATTCTGGGGGTTACCAGAAAGTTACCTTT	5789	2	clonotype971	clonotype971_consensus_2	single TCR
CGTCTACCAGACTCGC-1	TRUE	CGTCTACCAGACTCGC-1_contig_1	TRUE	519	TRA	TRAV29/DV5*01	None	TRAJ44*01	TRAC*01	TRUE	TRUE	CAARGTGTASKLTF	TGTGCAGCAAGGGGAACCGGCACTGCCAGTAAACTCACCTTT	8063	2	clonotype972	clonotype972_consensus_1	single TCR
CGTCTACCAGACTCGC-1	TRUE	CGTCTACCAGACTCGC-1_contig_3	TRUE	699	TRB	TRBV7-6*01	TRBD2*02	TRBJ1-6*01	TRBC1*01	TRUE	TRUE	CASSLESAGYNSPLHF	TGTGCCAGCAGCTTAGAATCGGCCGGATATAATTCACCCCTCCACTTT	1955	1	clonotype972	clonotype972_consensus_2	single TCR
CGTCTACCAGGACGTA-1	TRUE	CGTCTACCAGGACGTA-1_contig_1	TRUE	449	TRA	TRAV9-2*01	None	TRAJ9*01	TRAC*01	TRUE	TRUE	CAFNTGGFKTIF	TGTGCTTTTAATACTGGAGGCTTCAAAACTATCTTT	5289	1	clonotype973	clonotype973_consensus_2	single TCR
CGTCTACCAGGACGTA-1	TRUE	CGTCTACCAGGACGTA-1_contig_2	TRUE	680	TRB	TRBV9*01	TRBD1*01	TRBJ1-5*01	TRBC1*01	TRUE	TRUE	CASSPDQGGNQPQHF	TGTGCCAGCAGCCCAGACCAGGGGGGCAATCAGCCCCAGCATTTT	14850	6	clonotype973	clonotype973_consensus_1	single TCR
CGTCTACTCTTGTATC-1	TRUE	CGTCTACTCTTGTATC-1_contig_1	TRUE	569	TRA	TRAV19*01	None	TRAJ36*01	TRAC*01	TRUE	TRUE	CALSEVGGANNLFF	TGTGCTCTGAGTGAGGTGGGTGGGGCAAACAACCTCTTCTTT	3086	1	clonotype976	clonotype976_consensus_2	single TCR
CGTCTACTCTTGTATC-1	TRUE	CGTCTACTCTTGTATC-1_contig_2	TRUE	513	TRB	TRBV20-1*02	None	TRBJ2-2*01	TRBC2*01	TRUE	TRUE	CSARDLGRTRGELFF	TGCAGTGCTAGAGATTTGGGGAGAACACGCGGGGAGCTGTTTTTT	7810	3	clonotype976	clonotype976_consensus_1	single TCR
CGTGAGCCATCCGCGA-1	TRUE	CGTGAGCCATCCGCGA-1_contig_1	TRUE	636	TRB	TRBV7-2*01	TRBD1*01	TRBJ1-1*01	TRBC1*01	TRUE	TRUE	CASSLDTGNTEAFF	TGTGCCAGCAGCTTAGACACGGGGAACACTGAAGCTTTCTTT	9136	3	clonotype978	clonotype978_consensus_1	single TCR
CGTGAGCCATCCGCGA-1	TRUE	CGTGAGCCATCCGCGA-1_contig_2	TRUE	535	TRA	TRAV27*01	None	TRAJ30*01	TRAC*01	TRUE	TRUE	CAGGYLWRDDKIIF	TGTGCAGGAGGCTATTTATGGAGAGATGACAAGATCATCTTT	8836	2	clonotype978	clonotype978_consensus_2	single TCR
CGTGAGCTCCACTCCA-1	TRUE	CGTGAGCTCCACTCCA-1_contig_1	TRUE	766	TRB	TRBV2*01	TRBD1*01	TRBJ2-5*01	TRBC2*01	TRUE	TRUE	CASRSGAKGETQYF	TGTGCCAGCAGGTCCGGGGCAAAGGGCGAGACCCAGTACTTC	12196	4	clonotype979	clonotype979_consensus_1	single TCR
CGTGAGCTCCACTCCA-1	TRUE	CGTGAGCTCCACTCCA-1_contig_2	TRUE	566	TRA	TRAV12-3*01	None	TRAJ33*01	TRAC*01	TRUE	TRUE	CAREGRQNMDSNYQLIW	TGTGCAAGAGAGGGGCGTCAAAACATGGATAGCAACTATCAGTTAATCTGG	5081	2	clonotype979	clonotype979_consensus_2	single TCR
CGTGTAAGTCCGTTAA-1	TRUE	CGTGTAAGTCCGTTAA-1_contig_1	TRUE	589	TRA	TRAV29/DV5*01	None	TRAJ45*01	TRAC*01	TRUE	TRUE	CAASLMYSGGGADGLTF	TGTGCAGCAAGCCTTATGTATTCAGGAGGAGGTGCTGACGGACTCACCTTT	1916	2	clonotype982	clonotype982_consensus_1	single TCR
CGTGTAAGTCCGTTAA-1	TRUE	CGTGTAAGTCCGTTAA-1_contig_2	TRUE	699	TRB	TRBV20-1*02	None	TRBJ1-2*01	TRBC1*01	TRUE	TRUE	CSALLRTEYGYTF	TGCAGTGCTCTATTAAGGACCGAGTATGGCTACACCTTC	5620	4	clonotype982	clonotype982_consensus_2	single TCR
CGTGTAAGTCTTTCAT-1	TRUE	CGTGTAAGTCTTTCAT-1_contig_1	TRUE	693	TRB	TRBV27*01	TRBD2*01	TRBJ2-5*01	TRBC2*01	TRUE	TRUE	CASSHYLGGQETQYF	TGTGCCAGCAGTCACTATCTGGGGGGCCAAGAGACCCAGTACTTC	8203	3	clonotype983	clonotype983_consensus_2	single TCR
CGTGTAAGTCTTTCAT-1	TRUE	CGTGTAAGTCTTTCAT-1_contig_2	TRUE	535	TRA	TRAV14/DV4*01	None	TRAJ49*01	TRAC*01	TRUE	TRUE	CAMRRITGNQFYF	TGTGCAATGAGACGTATTACCGGTAACCAGTTCTATTTT	2530	1	clonotype983	clonotype983_consensus_1	single TCR
CGTTAGAAGACGCTTT-1	TRUE	CGTTAGAAGACGCTTT-1_contig_1	TRUE	533	TRA	TRAV8-4*01	None	TRAJ10*01	TRAC*01	TRUE	TRUE	CAVIVTGGGNKLTF	TGTGCTGTGATTGTCACGGGAGGAGGAAACAAACTCACCTTT	3926	1	clonotype986	clonotype986_consensus_2	single TCR
CGTTAGAAGACGCTTT-1	TRUE	CGTTAGAAGACGCTTT-1_contig_2	TRUE	531	TRB	TRBV28*01	None	TRBJ1-5*01	TRBC1*01	TRUE	TRUE	CASSPPVGNQPQHF	TGTGCCAGCAGTCCCCCCGTTGGCAATCAGCCCCAGCATTTT	3278	1	clonotype986	clonotype986_consensus_1	single TCR
CGTTAGAAGCCTTGAT-1	TRUE	CGTTAGAAGCCTTGAT-1_contig_1	TRUE	511	TRA	TRAV12-1*01	None	TRAJ13*02	TRAC*01	TRUE	TRUE	CVVNMAAGGYQKVTF	TGTGTGGTGAACATGGCGGCCGGGGGTTACCAGAAAGTTACCTTT	3575	1	clonotype987	clonotype987_consensus_1	single TCR
CGTTAGAAGCCTTGAT-1	TRUE	CGTTAGAAGCCTTGAT-1_contig_3	TRUE	470	TRB	TRBV28*01	TRBD1*01	TRBJ2-5*01	TRBC2*01	TRUE	TRUE	CASSSIRDPLWETQYF	TGTGCCAGCAGTTCCATCCGGGACCCACTGTGGGAGACCCAGTACTTC	2642	1	clonotype987	clonotype987_consensus_2	single TCR
CGTTAGACATAGTAAG-1	TRUE	CGTTAGACATAGTAAG-1_contig_1	TRUE	691	TRB	TRBV7-9*03	TRBD1*01	TRBJ2-2*01	TRBC2*01	TRUE	TRUE	CASSPTATGELFF	TGTGCCAGCAGCCCGACAGCAACCGGGGAGCTGTTTTTT	23722	9	clonotype989	clonotype989_consensus_2	single TCR
CGTTAGACATAGTAAG-1	TRUE	CGTTAGACATAGTAAG-1_contig_2	TRUE	772	TRA	TRAV17*01	None	TRAJ56*01	TRAC*01	TRUE	TRUE	CANHTGANSKLTF	TGTGCTAATCATACTGGAGCCAATAGTAAGCTGACATTT	11582	4	clonotype989	clonotype989_consensus_1	single TCR
CGTTAGATCCCAACGG-1	TRUE	CGTTAGATCCCAACGG-1_contig_1	TRUE	678	TRB	TRBV10-3*01	None	TRBJ1-2*01	TRBC1*01	TRUE	TRUE	CAISESAYYGYTF	TGTGCCATCAGTGAGTCAGCCTACTATGGCTACACCTTC	10663	3	clonotype991	clonotype991_consensus_2	single TCR
CGTTAGATCCCAACGG-1	TRUE	CGTTAGATCCCAACGG-1_contig_2	TRUE	551	TRA	TRAV23/DV6*01	None	TRAJ30*01	TRAC*01	TRUE	TRUE	CAASHRDDKIIF	TGTGCAGCAAGCCACAGAGATGACAAGATCATCTTT	4362	1	clonotype991	clonotype991_consensus_1	single TCR
CGTTCTGAGCGTTTAC-1	TRUE	CGTTCTGAGCGTTTAC-1_contig_1	TRUE	592	TRB	TRBV30*01	TRBD1*01	TRBJ1-6*01	TRBC1*01	TRUE	TRUE	CAWRQGTDNSPLHF	TGTGCCTGGCGACAGGGTACCGATAATTCACCCCTCCACTTT	3936	2	clonotype993	clonotype993_consensus_1	single TCR
CGTTCTGAGCGTTTAC-1	TRUE	CGTTCTGAGCGTTTAC-1_contig_2	TRUE	680	TRA	TRAV3*01	None	TRAJ20*01	TRAC*01	TRUE	TRUE	CAVRDMAYKLSF	TGTGCTGTGAGAGACATGGCCTACAAGCTCAGCTTT	3618	1	clonotype993	clonotype993_consensus_2	single TCR
CGTTCTGCACGGCCAT-1	TRUE	CGTTCTGCACGGCCAT-1_contig_1	TRUE	468	TRA	TRAV21*01	None	TRAJ26*01	TRAC*01	TRUE	TRUE	CAVRVHGQNFVF	TGTGCTGTGAGGGTCCATGGTCAGAATTTTGTCTTT	7193	2	clonotype997	clonotype997_consensus_2	single TCR
CGTTCTGCACGGCCAT-1	TRUE	CGTTCTGCACGGCCAT-1_contig_2	TRUE	546	TRB	TRBV7-9*01	None	TRBJ1-1*01	TRBC1*01	TRUE	TRUE	CASSLATTEAFF	TGTGCCAGCAGCTTAGCGACCACTGAAGCTTTCTTT	12242	4	clonotype997	clonotype997_consensus_1	single TCR
CGTTCTGTCCACGAAT-1	TRUE	CGTTCTGTCCACGAAT-1_contig_1	TRUE	698	TRB	TRBV6-1*01	TRBD1*01	TRBJ1-2*01	TRBC1*01	TRUE	TRUE	CASSSDWTGNYGYTF	TGTGCCAGCAGCTCGGACTGGACAGGGAACTATGGCTACACCTTC	22440	7	clonotype1001	clonotype1001_consensus_2	single TCR
CGTTCTGTCCACGAAT-1	TRUE	CGTTCTGTCCACGAAT-1_contig_2	TRUE	506	TRA	TRAV20*01	None	TRAJ57*01	TRAC*01	TRUE	TRUE	CAATQGGSEKLVF	TGTGCTGCCACTCAGGGCGGATCTGAAAAGCTGGTCTTT	3719	2	clonotype1001	clonotype1001_consensus_1	single TCR
CGTTCTGTCGGTCTAA-1	TRUE	CGTTCTGTCGGTCTAA-1_contig_1	TRUE	509	TRB	TRBV10-1*02	TRBD2*02	TRBJ2-7*01	TRBC2*01	TRUE	TRUE	CASSDEGSFSEQYF	TGCGCCAGCAGTGACGAGGGTTCATTTAGTGAGCAGTACTTC	7229	3	clonotype1002	clonotype1002_consensus_2	single TCR
CGTTCTGTCGGTCTAA-1	TRUE	CGTTCTGTCGGTCTAA-1_contig_2	TRUE	541	TRA	TRAV26-1*01	None	TRAJ40*01	TRAC*01	TRUE	TRUE	CIVRVPLGTYKYIF	TGCATCGTCAGAGTCCCCTTGGGAACCTACAAATACATCTTT	3294	1	clonotype1002	clonotype1002_consensus_1	single TCR
CGTTGGGAGTGTGAAT-1	TRUE	CGTTGGGAGTGTGAAT-1_contig_1	TRUE	521	TRB	TRBV12-4*01	None	TRBJ1-6*02	TRBC1*01	TRUE	TRUE	CASSYINSPLHF	TGTGCCAGCAGTTATATCAATTCACCCCTCCACTTT	12292	4	clonotype1004	clonotype1004_consensus_1	single TCR
CGTTGGGAGTGTGAAT-1	TRUE	CGTTGGGAGTGTGAAT-1_contig_2	TRUE	455	TRA	TRAV21*01	None	TRAJ39*01	TRAC*01	TRUE	TRUE	CAVSNNAGNMLTF	TGTGCTGTGAGTAATAATGCAGGCAACATGCTCACCTTT	4650	1	clonotype1004	clonotype1004_consensus_2	single TCR
CGTTGGGTCATAGCAC-1	TRUE	CGTTGGGTCATAGCAC-1_contig_1	TRUE	820	TRB	TRBV19*01	TRBD2*01	TRBJ2-2*01	TRBC2*01	TRUE	TRUE	CASSSWVNSFTGELFF	TGTGCCAGTAGTTCGTGGGTGAACAGTTTTACCGGGGAGCTGTTTTTT	18914	9	clonotype1006	clonotype1006_consensus_2	single TCR
CGTTGGGTCATAGCAC-1	TRUE	CGTTGGGTCATAGCAC-1_contig_4	TRUE	732	TRA	TRAV29/DV5*01	None	TRAJ39*01	TRAC*01	TRUE	TRUE	CAASGNAGNMLTF	TGTGCAGCAAGCGGGAATGCAGGCAACATGCTCACCTTT	10920	3	clonotype1006	clonotype1006_consensus_1	single TCR
CTAACTTGTCGCTTCT-1	TRUE	CTAACTTGTCGCTTCT-1_contig_1	TRUE	480	TRA	TRAV21*01	None	TRAJ27*01	TRAC*01	TRUE	TRUE	CADTNAGKSTF	TGTGCTGACACCAATGCAGGCAAATCAACCTTT	3475	1	clonotype1008	clonotype1008_consensus_2	single TCR
CTAACTTGTCGCTTCT-1	TRUE	CTAACTTGTCGCTTCT-1_contig_2	TRUE	687	TRB	TRBV12-4*01	TRBD1*01	TRBJ1-5*01	TRBC1*01	TRUE	TRUE	CASSLRGDINQPQHF	TGTGCCAGCAGTTTAAGGGGGGACATAAATCAGCCCCAGCATTTT	4858	2	clonotype1008	clonotype1008_consensus_1	single TCR
CTAACTTGTTCAGACT-1	TRUE	CTAACTTGTTCAGACT-1_contig_1	TRUE	682	TRB	TRBV7-2*01	TRBD1*01	TRBJ2-1*01	TRBC2*01	TRUE	TRUE	CASSWDRGQEFF	TGTGCCAGCAGCTGGGACCGGGGACAGGAGTTCTTC	25324	8	clonotype1010	clonotype1010_consensus_2	single TCR
CTAACTTGTTCAGACT-1	TRUE	CTAACTTGTTCAGACT-1_contig_2	TRUE	837	TRA	TRAV8-4*01	None	TRAJ48*01	TRAC*01	TRUE	TRUE	CAVTAFGNEKLTF	TGTGCTGTGACAGCATTTGGAAATGAGAAATTAACCTTT	11305	5	clonotype1010	clonotype1010_consensus_1	single TCR
CTAACTTGTTTGGGCC-1	TRUE	CTAACTTGTTTGGGCC-1_contig_1	TRUE	538	TRA	TRAV38-2/DV8*01	None	TRAJ32*02	TRAC*01	TRUE	TRUE	CAYRSRGGATNKLIF	TGTGCTTATAGGAGCAGGGGTGGTGCTACAAACAAGCTCATCTTT	6282	2	clonotype1011	clonotype1011_consensus_2	single TCR
CTAACTTGTTTGGGCC-1	TRUE	CTAACTTGTTTGGGCC-1_contig_3	TRUE	646	TRB	TRBV29-1*01	TRBD2*01	TRBJ2-7*01	TRBC2*01	TRUE	TRUE	CSARRAEGQYF	TGCAGCGCCCGGCGGGCCGAAGGGCAGTACTTC	12153	4	clonotype1011	clonotype1011_consensus_1	single TCR
CTAAGACAGGTAGCTG-1	TRUE	CTAAGACAGGTAGCTG-1_contig_1	TRUE	521	TRB	TRBV20-1*02	TRBD1*01	TRBJ1-5*01	TRBC1*01	TRUE	TRUE	CSASEDSPNQPQHF	TGCAGTGCTAGTGAGGACAGTCCCAATCAGCCCCAGCATTTT	6844	2	clonotype1012	clonotype1012_consensus_1	single TCR
CTAAGACAGGTAGCTG-1	TRUE	CTAAGACAGGTAGCTG-1_contig_2	TRUE	605	TRA	TRAV12-2*01	None	TRAJ22*01	TRAC*01	TRUE	TRUE	CAVSAGSARQLTF	TGTGCCGTGTCGGCCGGTTCTGCAAGGCAACTGACCTTT	4193	1	clonotype1012	clonotype1012_consensus_2	single TCR
CTAAGACTCGGAATCT-1	TRUE	CTAAGACTCGGAATCT-1_contig_1	TRUE	531	TRA	TRAV38-1*01	None	TRAJ45*01	TRAC*01	TRUE	TRUE	CAFKGGADGLTF	TGTGCTTTCAAGGGGGGTGCTGACGGACTCACCTTT	3491	1	clonotype1016	clonotype1016_consensus_2	single TCR
CTAAGACTCGGAATCT-1	TRUE	CTAAGACTCGGAATCT-1_contig_2	TRUE	679	TRB	TRBV3-1*01	None	TRBJ2-7*01	TRBC2*01	TRUE	TRUE	CASSQVVFSYEQYF	TGTGCCAGCAGCCAAGTAGTGTTCTCCTACGAGCAGTACTTC	6458	3	clonotype1016	clonotype1016_consensus_1	single TCR
CTAATGGAGTGGGCTA-1	TRUE	CTAATGGAGTGGGCTA-1_contig_1	TRUE	664	TRB	TRBV4-1*01	TRBD1*01	TRBJ1-6*01	TRBC1*01	TRUE	TRUE	CASSQQGSSYNSPLHF	TGCGCCAGCAGCCAACAGGGTTCGTCCTATAATTCACCCCTCCACTTT	9208	5	clonotype1017	clonotype1017_consensus_1	single TCR
CTAATGGAGTGGGCTA-1	TRUE	CTAATGGAGTGGGCTA-1_contig_2	TRUE	682	TRA	TRAV8-3*01	None	TRAJ5*01	TRAC*01	TRUE	TRUE	CAVDGDTGRRALTF	TGTGCTGTGGATGGCGACACGGGCAGGAGAGCACTTACTTTT	8143	4	clonotype1017	clonotype1017_consensus_2	single TCR
CTAATGGCATTCTCAT-1	TRUE	CTAATGGCATTCTCAT-1_contig_1	TRUE	682	TRB	TRBV7-2*01	TRBD1*01	TRBJ2-7*01	TRBC2*01	TRUE	TRUE	CASSSSWTGTYEQYF	TGTGCCAGCAGCTCGAGTTGGACAGGGACCTACGAGCAGTACTTC	17765	6	clonotype1018	clonotype1018_consensus_2	single TCR
CTAATGGCATTCTCAT-1	TRUE	CTAATGGCATTCTCAT-1_contig_2	TRUE	573	TRA	TRAV23/DV6*01	None	TRAJ40*01	TRAC*01	TRUE	TRUE	CAARSSGTYKYIF	TGTGCAGCAAGGTCCTCAGGAACCTACAAATACATCTTT	4548	2	clonotype1018	clonotype1018_consensus_1	single TCR
CTAATGGGTACTCTCC-1	TRUE	CTAATGGGTACTCTCC-1_contig_1	TRUE	694	TRB	TRBV12-3*01	TRBD1*01	TRBJ1-6*02	TRBC1*01	TRUE	TRUE	CASTFTTADSYNSPLHF	TGTGCCAGCACCTTCACGACAGCGGACTCCTATAATTCACCCCTCCACTTT	13782	5	clonotype1019	clonotype1019_consensus_1	single TCR
CTAATGGGTACTCTCC-1	TRUE	CTAATGGGTACTCTCC-1_contig_2	TRUE	522	TRA	TRAV27*01	None	TRAJ54*01	TRAC*01	TRUE	TRUE	CAGGGAQKLVF	TGTGCAGGAGGGGGAGCCCAGAAGCTGGTATTT	3131	1	clonotype1019	clonotype1019_consensus_2	single TCR
CTAATGGTCATGCATG-1	TRUE	CTAATGGTCATGCATG-1_contig_1	TRUE	507	TRA	TRAV5*01	None	TRAJ16*01	TRAC*01	TRUE	TRUE	CAEGF	TGTGCAGAGGGGTTT	3923	1	clonotype1021	clonotype1021_consensus_2	single TCR
CTAATGGTCATGCATG-1	TRUE	CTAATGGTCATGCATG-1_contig_2	TRUE	497	TRB	TRBV15*01	TRBD1*01	TRBJ1-1*01	TRBC1*01	TRUE	TRUE	CATSRLGQGNTEAFF	TGTGCCACCAGCAGACTAGGACAGGGGAACACTGAAGCTTTCTTT	6385	2	clonotype1021	clonotype1021_consensus_1	single TCR
CTACACCAGAGGGCTT-1	TRUE	CTACACCAGAGGGCTT-1_contig_1	TRUE	688	TRB	TRBV12-4*01	None	TRBJ1-2*01	TRBC1*01	TRUE	TRUE	CASTPLVKSNYGYTF	TGTGCCAGCACCCCCCTAGTGAAGTCTAACTATGGCTACACCTTC	15730	5	clonotype1022	clonotype1022_consensus_1	single TCR
CTACACCAGAGGGCTT-1	TRUE	CTACACCAGAGGGCTT-1_contig_4	TRUE	669	TRA	TRAV30*01	None	TRAJ37*02	TRAC*01	TRUE	TRUE	CGTEPHPPSNTGKLIF	TGTGGCACAGAGCCCCATCCCCCTAGCAACACAGGCAAACTAATCTTT	4249	1	clonotype1022	clonotype1022_consensus_2	single TCR
CTACACCAGCAATATG-1	TRUE	CTACACCAGCAATATG-1_contig_2	TRUE	733	TRB	TRBV7-9*03	TRBD1*01	TRBJ1-1*01	TRBC1*01	TRUE	TRUE	CASSTTGVGTEAFF	TGTGCCAGCAGCACGACAGGGGTAGGCACTGAAGCTTTCTTT	22339	7	clonotype1023	clonotype1023_consensus_1	single TCR
CTACACCAGCAATATG-1	TRUE	CTACACCAGCAATATG-1_contig_4	TRUE	542	TRA	TRAV29/DV5*01	None	TRAJ30*01	TRAC*01	TRUE	TRUE	CAASARVRDDKIIF	TGTGCAGCAAGCGCGCGAGTCAGAGATGACAAGATCATCTTT	7924	2	clonotype1023	clonotype1023_consensus_2	single TCR
CTACACCGTCCAAGTT-1	TRUE	CTACACCGTCCAAGTT-1_contig_2	TRUE	824	TRB	TRBV19*01	TRBD2*01	TRBJ2-1*01	TRBC2*01	TRUE	TRUE	CASSINGGAWGEQFF	TGTGCCAGTAGTATCAACGGGGGGGCCTGGGGTGAGCAGTTCTTC	8165	4	clonotype1024	clonotype1024_consensus_1	single TCR
CTACACCGTCCAAGTT-1	TRUE	CTACACCGTCCAAGTT-1_contig_4	TRUE	531	TRA	TRAV38-2/DV8*01	None	TRAJ48*01	TRAC*01	TRUE	TRUE	CAYRSPISNFGNEKLTF	TGTGCTTATAGGAGCCCCATATCTAACTTTGGAAATGAGAAATTAACCTTT	3631	1	clonotype1024	clonotype1024_consensus_2	single TCR
CTACATTAGAGGTTAT-1	TRUE	CTACATTAGAGGTTAT-1_contig_1	TRUE	499	TRB	TRBV4-2*01	TRBD1*01	TRBJ2-1*01	TRBC2*01	TRUE	TRUE	CASSQDPGRTSYNEQFF	TGTGCCAGCAGCCAAGACCCAGGACGGACATCCTACAATGAGCAGTTCTTC	8837	3	clonotype1025	clonotype1025_consensus_1	single TCR
CTACATTAGAGGTTAT-1	TRUE	CTACATTAGAGGTTAT-1_contig_2	TRUE	576	TRA	TRAV23/DV6*01	None	TRAJ13*02	TRAC*01	TRUE	TRUE	CAATVDGGYQKVTF	TGTGCAGCAACCGTTGATGGGGGTTACCAGAAAGTTACCTTT	6748	2	clonotype1025	clonotype1025_consensus_2	single TCR
CTACATTCATATGAGA-1	TRUE	CTACATTCATATGAGA-1_contig_1	TRUE	699	TRA	TRAV1-1*01	None	TRAJ23*01	TRAC*01	TRUE	TRUE	CAVIYNQGGKLIF	TGCGCTGTGATTTATAACCAGGGAGGAAAGCTTATCTTC	8211	2	clonotype1028	clonotype1028_consensus_1	single TCR
CTACATTCATATGAGA-1	TRUE	CTACATTCATATGAGA-1_contig_2	TRUE	537	TRB	TRBV9*02	TRBD1*01	TRBJ2-3*01	TRBC2*01	TRUE	TRUE	CASSVSIDGGPRDTQYF	TGTGCCAGCAGCGTTAGTATAGACGGGGGGCCGCGGGATACGCAGTATTTT	6191	2	clonotype1028	clonotype1028_consensus_2	single TCR
CTACCCAAGTCTCGGC-1	TRUE	CTACCCAAGTCTCGGC-1_contig_1	TRUE	668	TRB	TRBV4-1*01	TRBD2*02	TRBJ1-5*01	TRBC1*01	TRUE	TRUE	CASSQVREASNQPQHF	TGCGCCAGCAGCCAAGTGAGGGAGGCGAGCAATCAGCCCCAGCATTTT	30749	9	clonotype1030	clonotype1030_consensus_2	single TCR
CTACCCAAGTCTCGGC-1	TRUE	CTACCCAAGTCTCGGC-1_contig_4	TRUE	460	TRA	TRAV9-2*01	None	TRAJ6*01	TRAC*01	TRUE	TRUE	CALRPSGGSYIPTF	TGTGCTCTGAGGCCATCAGGAGGAAGCTACATACCTACATTT	4101	2	clonotype1030	clonotype1030_consensus_1	single TCR
CTACCCAGTTTGACTG-1	TRUE	CTACCCAGTTTGACTG-1_contig_1	TRUE	712	TRB	TRBV6-1*01	TRBD1*01	TRBJ1-1*01	TRBC1*01	TRUE	TRUE	CASSEVTGTSTEAFF	TGTGCCAGCAGTGAAGTGACCGGGACATCGACTGAAGCTTTCTTT	13451	4	clonotype1034	clonotype1034_consensus_2	single TCR
CTACCCAGTTTGACTG-1	TRUE	CTACCCAGTTTGACTG-1_contig_2	TRUE	490	TRA	TRAV13-1*01	None	TRAJ42*01	TRAC*01	TRUE	TRUE	CAAGGGSQGNLIF	TGTGCAGCAGGGGGAGGAAGCCAAGGAAATCTCATCTTT	3897	1	clonotype1034	clonotype1034_consensus_1	single TCR
CTACGTCAGATCGGGT-1	TRUE	CTACGTCAGATCGGGT-1_contig_1	TRUE	833	TRB	TRBV5-4*01	TRBD2*02	TRBJ1-2*01	TRBC1*01	TRUE	TRUE	CASSLRGGNGYTF	TGTGCCAGCAGCTTAAGGGGAGGTAATGGCTACACCTTC	5015	2	clonotype1035	clonotype1035_consensus_1	single TCR
CTACGTCAGATCGGGT-1	TRUE	CTACGTCAGATCGGGT-1_contig_5	TRUE	494	TRA	TRAV38-1*01	None	TRAJ54*01	TRAC*01	TRUE	TRUE	CAFMKGQGAQKLVF	TGTGCTTTCATGAAGGGCCAGGGAGCCCAGAAGCTGGTATTT	4151	1	clonotype1035	clonotype1035_consensus_2	single TCR
CTACGTCAGCGAAGGG-1	TRUE	CTACGTCAGCGAAGGG-1_contig_1	TRUE	562	TRA	TRAV12-2*01	None	TRAJ18*01	TRAC*01	TRUE	TRUE	CAVNLRGRGSTLGRLYF	TGTGCCGTGAACCTCCGTGGCAGAGGCTCAACCCTGGGGAGGCTATACTTT	10037	3	clonotype1037	clonotype1037_consensus_1	single TCR
CTACGTCAGCGAAGGG-1	TRUE	CTACGTCAGCGAAGGG-1_contig_2	TRUE	521	TRB	TRBV5-1*01	TRBD1*01	TRBJ2-3*01	TRBC2*01	TRUE	TRUE	CASSLDRATDTQYF	TGCGCCAGCAGCTTGGACAGGGCTACAGATACGCAGTATTTT	6569	2	clonotype1037	clonotype1037_consensus_2	single TCR
CTACGTCAGTTGCAGG-1	TRUE	CTACGTCAGTTGCAGG-1_contig_1	TRUE	749	TRB	TRBV28*01	TRBD1*01	TRBJ1-5*01	TRBC1*01	TRUE	TRUE	CASSPGTGVQPQHF	TGTGCCAGCAGTCCCGGGACAGGGGTTCAGCCCCAGCATTTT	6369	2	clonotype1039	clonotype1039_consensus_1	single TCR
CTACGTCAGTTGCAGG-1	TRUE	CTACGTCAGTTGCAGG-1_contig_2	TRUE	454	TRA	TRAV12-3*01	None	TRAJ9*01	TRAC*01	TRUE	TRUE	CAIYTGGFKTIF	TGTGCAATTTATACTGGAGGCTTCAAAACTATCTTT	4462	1	clonotype1039	clonotype1039_consensus_2	single TCR
CTACGTCGTGCCTGGT-1	TRUE	CTACGTCGTGCCTGGT-1_contig_1	TRUE	661	TRB	TRBV27*01	TRBD2*02	TRBJ2-1*01	TRBC2*01	TRUE	TRUE	CASSLASGRDNEQFF	TGTGCCAGCAGTTTAGCTAGCGGGAGGGACAATGAGCAGTTCTTC	3520	1	clonotype1041	clonotype1041_consensus_2	single TCR
CTACGTCGTGCCTGGT-1	TRUE	CTACGTCGTGCCTGGT-1_contig_4	TRUE	554	TRA	TRAV12-2*01	None	TRAJ37*02	TRAC*01	TRUE	TRUE	CAVSSSSNTGKLIF	TGTGCCGTGAGTAGCTCTAGCAACACAGGCAAACTAATCTTT	3865	1	clonotype1041	clonotype1041_consensus_1	single TCR
CTACGTCTCAGCACAT-1	TRUE	CTACGTCTCAGCACAT-1_contig_1	TRUE	709	TRB	TRBV11-2*03	None	TRBJ2-7*01	TRBC2*01	TRUE	TRUE	CASSLNPRGNEQYF	TGTGCCAGCAGCTTAAACCCCCGTGGGAACGAGCAGTACTTC	4833	2	clonotype1042	clonotype1042_consensus_2	single TCR
CTACGTCTCAGCACAT-1	TRUE	CTACGTCTCAGCACAT-1_contig_3	TRUE	679	TRA	TRAV8-3*01	None	TRAJ27*01	TRAC*01	TRUE	TRUE	CAVGESAGKSTF	TGTGCTGTGGGTGAGAGTGCAGGCAAATCAACCTTT	2257	1	clonotype1042	clonotype1042_consensus_1	single TCR
CTAGAGTGTTCTGAAC-1	TRUE	CTAGAGTGTTCTGAAC-1_contig_1	TRUE	550	TRB	TRBV6-2*01	TRBD2*02	TRBJ2-1*01	TRBC2*01	TRUE	TRUE	CASSWLAGAGYNEQFF	TGTGCCAGCAGTTGGCTAGCGGGAGCGGGATACAATGAGCAGTTCTTC	6345	2	clonotype1046	clonotype1046_consensus_1	single TCR
CTAGAGTGTTCTGAAC-1	TRUE	CTAGAGTGTTCTGAAC-1_contig_2	TRUE	568	TRA	TRAV22*01	None	TRAJ43*01	TRAC*01	TRUE	TRUE	CAVQEYNNNDMRF	TGTGCTGTCCAGGAGTACAATAACAATGACATGCGCTTT	3677	1	clonotype1046	clonotype1046_consensus_2	single TCR
CTAGCCTAGCCACGTC-1	TRUE	CTAGCCTAGCCACGTC-1_contig_1	TRUE	761	TRB	TRBV18*01	TRBD1*01	TRBJ2-7*01	TRBC2*01	TRUE	TRUE	CASSPGTGSAYEQYF	TGTGCCAGCTCACCCGGGACAGGTTCTGCCTACGAGCAGTACTTC	12017	5	clonotype1048	clonotype1048_consensus_2	single TCR
CTAGCCTAGCCACGTC-1	TRUE	CTAGCCTAGCCACGTC-1_contig_2	TRUE	553	TRA	TRAV12-2*01	None	TRAJ5*01	TRAC*01	TRUE	TRUE	CAVGSTGRRALTF	TGTGCCGTGGGGAGCACGGGCAGGAGAGCACTTACTTTT	10302	3	clonotype1048	clonotype1048_consensus_1	single TCR
CTAGCCTGTGATAAAC-1	TRUE	CTAGCCTGTGATAAAC-1_contig_1	TRUE	708	TRB	TRBV3-1*01	TRBD2*02	TRBJ2-3*01	TRBC2*01	TRUE	TRUE	CASSQGLGGLAGISDTQYF	TGTGCCAGCAGCCAAGGTTTGGGCGGACTAGCGGGAATCTCAGATACGCAGTATTTT	9098	5	clonotype1050	clonotype1050_consensus_1	single TCR
CTAGCCTGTGATAAAC-1	TRUE	CTAGCCTGTGATAAAC-1_contig_2	TRUE	565	TRA	TRAV9-2*01	None	TRAJ4*01	TRAC*01	TRUE	TRUE	CACSGGYNKLIF	TGTGCTTGTTCTGGTGGCTACAATAAGCTGATTTTT	1967	1	clonotype1050	clonotype1050_consensus_2	single TCR
CTAGCCTGTTACTGAC-1	TRUE	CTAGCCTGTTACTGAC-1_contig_1	TRUE	694	TRB	TRBV19*01	TRBD1*01	TRBJ1-1*01	TRBC1*01	TRUE	TRUE	CASSKGGQTNTEAFF	TGTGCCAGTAGTAAAGGAGGACAGACGAACACTGAAGCTTTCTTT	6300	3	clonotype1051	clonotype1051_consensus_2	single TCR
CTAGCCTGTTACTGAC-1	TRUE	CTAGCCTGTTACTGAC-1_contig_3	TRUE	580	TRA	TRAV21*01	None	TRAJ24*02	TRAC*01	TRUE	TRUE	CAVRPADSWGKLQF	TGTGCTGTGAGGCCGGCTGACAGCTGGGGGAAATTGCAGTTT	3798	1	clonotype1051	clonotype1051_consensus_1	single TCR
CTAGCCTTCAGCTCGG-1	TRUE	CTAGCCTTCAGCTCGG-1_contig_1	TRUE	524	TRB	TRBV2*01	None	TRBJ1-2*01	TRBC1*01	TRUE	TRUE	CASIWIGYGYTF	TGTGCCAGCATTTGGATTGGGTATGGCTACACCTTC	3094	1	clonotype1052	clonotype1052_consensus_2	single TCR
CTAGCCTTCAGCTCGG-1	TRUE	CTAGCCTTCAGCTCGG-1_contig_2	TRUE	457	TRA	TRAV21*01	None	TRAJ45*01	TRAC*01	TRUE	TRUE	CAVGGSGGGADGLTF	TGTGCTGTGGGTGGGTCAGGAGGAGGTGCTGACGGACTCACCTTT	3828	1	clonotype1052	clonotype1052_consensus_1	single TCR
CTAGTGAGTCTGGAGA-1	TRUE	CTAGTGAGTCTGGAGA-1_contig_1	TRUE	691	TRB	TRBV5-1*01	TRBD2*01	TRBJ1-5*01	TRBC1*01	TRUE	TRUE	CASSLVGDGGQPQHF	TGCGCCAGCAGCTTGGTCGGAGACGGTGGTCAGCCCCAGCATTTT	35045	12	clonotype1054	clonotype1054_consensus_1	single TCR
CTAGTGAGTCTGGAGA-1	TRUE	CTAGTGAGTCTGGAGA-1_contig_3	TRUE	466	TRA	TRAV2*01	None	TRAJ15*01	TRAC*01	TRUE	TRUE	CAVANQAGTALIF	TGTGCTGTCGCGAACCAGGCAGGAACTGCTCTGATCTTT	2970	1	clonotype1054	clonotype1054_consensus_2	single TCR
CTCACACAGGAGCGTT-1	TRUE	CTCACACAGGAGCGTT-1_contig_1	TRUE	715	TRB	TRBV20-1*02	TRBD1*01	TRBJ2-5*01	TRBC2*01	TRUE	TRUE	CSAKPPQMGTGRQETQYF	TGCAGTGCTAAGCCCCCGCAAATGGGGACAGGGAGACAAGAGACCCAGTACTTC	38742	13	clonotype1057	clonotype1057_consensus_2	single TCR
CTCACACAGGAGCGTT-1	TRUE	CTCACACAGGAGCGTT-1_contig_2	TRUE	813	TRA	TRAV8-2*01	None	TRAJ4*01	TRAC*01	TRUE	TRUE	CVVFSGGYNKLIF	TGTGTTGTTTTTTCTGGTGGCTACAATAAGCTGATTTTT	37713	13	clonotype1057	clonotype1057_consensus_1	single TCR
CTCACACAGTTACCCA-1	TRUE	CTCACACAGTTACCCA-1_contig_1	TRUE	565	TRA	TRAV12-1*01	None	TRAJ21*01	TRAC*01	TRUE	TRUE	CVVNPYNFNKFYF	TGTGTGGTGAACCCATACAACTTCAACAAATTTTACTTT	3346	1	clonotype1058	clonotype1058_consensus_2	single TCR
CTCACACAGTTACCCA-1	TRUE	CTCACACAGTTACCCA-1_contig_2	TRUE	683	TRB	TRBV7-9*01	TRBD1*01	TRBJ2-2*01	TRBC2*01	TRUE	TRUE	CASSSHRGSGELFF	TGTGCCAGCAGCTCCCACAGGGGCTCGGGGGAGCTGTTTTTT	5970	3	clonotype1058	clonotype1058_consensus_1	single TCR
CTCAGAACAAGTCATC-1	TRUE	CTCAGAACAAGTCATC-1_contig_1	TRUE	761	TRB	TRBV18*01	TRBD1*01	TRBJ2-5*01	TRBC2*01	TRUE	TRUE	CASSPTAGGRETQYF	TGTGCCAGCTCACCTACGGCAGGGGGCCGGGAGACCCAGTACTTC	5276	2	clonotype1063	clonotype1063_consensus_2	single TCR
CTCAGAACAAGTCATC-1	TRUE	CTCAGAACAAGTCATC-1_contig_3	TRUE	523	TRA	TRAV13-1*01	None	TRAJ42*01	TRAC*01	TRUE	TRUE	CAAGRSQGNLIF	TGTGCAGCAGGGAGAAGCCAAGGAAATCTCATCTTT	993	1	clonotype1063	clonotype1063_consensus_1	single TCR
CTCAGAAGTAAGCACG-1	TRUE	CTCAGAAGTAAGCACG-1_contig_1	TRUE	734	TRB	TRBV7-9*03	TRBD1*01	TRBJ2-7*01	TRBC2*01	TRUE	TRUE	CASSPDRAWREQYF	TGTGCCAGCAGCCCGGACAGGGCCTGGCGCGAGCAGTACTTC	30108	8	clonotype1065	clonotype1065_consensus_2	single TCR
CTCAGAAGTAAGCACG-1	TRUE	CTCAGAAGTAAGCACG-1_contig_2	TRUE	610	TRA	TRAV23/DV6*01	None	TRAJ17*01	TRAC*01	TRUE	TRUE	CAAKYAGAAGNKLTF	TGTGCAGCAAAGTATGCAGGAGCTGCAGGCAACAAGCTAACTTTT	11084	4	clonotype1065	clonotype1065_consensus_1	single TCR
CTCAGAAGTTGAGTTC-1	TRUE	CTCAGAAGTTGAGTTC-1_contig_1	TRUE	531	TRA	TRAV13-2*01	None	TRAJ50*01	TRAC*01	TRUE	TRUE	CAEKTSYDKVIF	TGTGCAGAGAAAACCTCCTACGACAAGGTGATATTT	4246	1	clonotype1066	clonotype1066_consensus_2	single TCR
CTCAGAAGTTGAGTTC-1	TRUE	CTCAGAAGTTGAGTTC-1_contig_2	TRUE	680	TRB	TRBV5-1*01	None	TRBJ1-1*01	TRBC1*01	TRUE	TRUE	CASSLDAGLGTEAFF	TGCGCCAGCAGCTTGGACGCAGGCCTGGGAACTGAAGCTTTCTTT	11539	4	clonotype1066	clonotype1066_consensus_1	single TCR
CTCAGAATCGCTTGTC-1	TRUE	CTCAGAATCGCTTGTC-1_contig_1	TRUE	564	TRA	TRAV16*01	None	TRAJ3*01	TRAC*01	TRUE	TRUE	CALSGRHSSASKIIF	TGTGCTCTAAGTGGGCGACACAGCAGTGCTTCCAAGATAATCTTT	3606	1	clonotype1067	clonotype1067_consensus_2	single TCR
CTCAGAATCGCTTGTC-1	TRUE	CTCAGAATCGCTTGTC-1_contig_3	TRUE	508	TRB	TRBV7-2*02	TRBD2*02	TRBJ2-3*01	TRBC2*01	TRUE	TRUE	CASSLRAGGGTDTQYF	TGTGCCAGCAGTTTAAGGGCGGGAGGGGGCACAGATACGCAGTATTTT	2346	1	clonotype1067	clonotype1067_consensus_1	single TCR
CTCATTAAGCTCTCGG-1	TRUE	CTCATTAAGCTCTCGG-1_contig_1	TRUE	680	TRA	TRAV8-3*01	None	TRAJ20*01	TRAC*01	TRUE	TRUE	CAVGEVYDYKLSF	TGTGCTGTGGGTGAGGTGTACGACTACAAGCTCAGCTTT	5491	2	clonotype1068	clonotype1068_consensus_1	single TCR
CTCATTAAGCTCTCGG-1	TRUE	CTCATTAAGCTCTCGG-1_contig_2	TRUE	820	TRB	TRBV19*01	None	TRBJ2-2*01	TRBC2*01	TRUE	TRUE	CASSIAPTSGELFF	TGTGCCAGTAGTATTGCTCCCACATCCGGGGAGCTGTTTTTT	4980	2	clonotype1068	clonotype1068_consensus_2	single TCR
CTCATTACATCACCCT-1	TRUE	CTCATTACATCACCCT-1_contig_1	TRUE	712	TRB	TRBV3-1*01	None	TRBJ1-1*01	TRBC1*01	TRUE	TRUE	CASSLQDRNTEAFF	TGTGCCAGCAGCCTACAAGACCGAAACACTGAAGCTTTCTTT	13290	6	clonotype1069	clonotype1069_consensus_2	single TCR
CTCATTACATCACCCT-1	TRUE	CTCATTACATCACCCT-1_contig_2	TRUE	564	TRA	TRAV29/DV5*01	None	TRAJ43*01	TRAC*01	TRUE	TRUE	CAANILGDMRF	TGTGCAGCAAATATCTTAGGTGACATGCGCTTT	11260	3	clonotype1069	clonotype1069_consensus_1	single TCR
CTCATTATCGGCGGTT-1	TRUE	CTCATTATCGGCGGTT-1_contig_2	TRUE	684	TRB	TRBV20-1*02	TRBD1*01	TRBJ1-6*02	TRBC1*01	TRUE	TRUE	CSARGPSDRTSGSPLHF	TGCAGTGCTAGGGGGCCTTCAGACAGGACGTCGGGTTCACCCCTCCACTTT	3887	1	clonotype1072	clonotype1072_consensus_1	single TCR
CTCATTATCGGCGGTT-1	TRUE	CTCATTATCGGCGGTT-1_contig_3	TRUE	532	TRA	TRAV23/DV6*01	None	TRAJ40*01	TRAC*01	TRUE	TRUE	CAARGSGTYKYIF	TGTGCAGCGAGGGGGTCAGGAACCTACAAATACATCTTT	3906	1	clonotype1072	clonotype1072_consensus_2	single TCR
CTCCTAGAGGTGTGGT-1	TRUE	CTCCTAGAGGTGTGGT-1_contig_1	TRUE	572	TRA	TRAV12-3*01	None	TRAJ52*01	TRAC*01	TRUE	TRUE	CAMSAGAGGTSYGKLTF	TGTGCAATGAGCGCGGGTGCTGGTGGTACTAGCTATGGAAAGCTGACATTT	11464	3	clonotype1073	clonotype1073_consensus_1	single TCR
CTCCTAGAGGTGTGGT-1	TRUE	CTCCTAGAGGTGTGGT-1_contig_2	TRUE	560	TRB	TRBV5-1*01	TRBD2*02	TRBJ2-3*01	TRBC2*01	TRUE	TRUE	CASRSAVVTDTQYF	TGCGCCAGCAGGTCAGCGGTAGTCACAGATACGCAGTATTTT	6339	2	clonotype1073	clonotype1073_consensus_2	single TCR
CTCCTAGAGTCCAGGA-1	TRUE	CTCCTAGAGTCCAGGA-1_contig_1	TRUE	692	TRB	TRBV6-5*01	TRBD2*02	TRBJ2-2*01	TRBC2*01	TRUE	TRUE	CASSSPVGGRTGELFF	TGTGCCAGCAGTTCCCCAGTCGGAGGGAGGACCGGGGAGCTGTTTTTT	6405	2	clonotype1075	clonotype1075_consensus_2	single TCR
CTCCTAGAGTCCAGGA-1	TRUE	CTCCTAGAGTCCAGGA-1_contig_3	TRUE	676	TRA	TRAV3*01	None	TRAJ4*01	TRAC*01	TRUE	TRUE	CAVRDPKGGYNKLIF	TGTGCTGTGAGAGACCCGAAGGGTGGCTACAATAAGCTGATTTTT	2516	1	clonotype1075	clonotype1075_consensus_1	single TCR
CTCCTAGAGTCTTGCA-1	TRUE	CTCCTAGAGTCTTGCA-1_contig_1	TRUE	541	TRA	TRAV1-2*01	None	TRAJ22*01	TRAC*01	TRUE	TRUE	CAVRASPSGSARQLTF	TGTGCTGTGAGAGCTTCCCCTTCTGGTTCTGCAAGGCAACTGACCTTT	3488	1	clonotype1076	clonotype1076_consensus_1	single TCR
CTCCTAGAGTCTTGCA-1	TRUE	CTCCTAGAGTCTTGCA-1_contig_2	TRUE	834	TRB	TRBV5-6*01	None	TRBJ2-7*01	TRBC2*01	TRUE	TRUE	CASSYTGPPPEQYF	TGTGCCAGCAGCTACACCGGTCCCCCGCCCGAGCAGTACTTC	5153	2	clonotype1076	clonotype1076_consensus_2	single TCR
CTCCTAGCATCCTAGA-1	TRUE	CTCCTAGCATCCTAGA-1_contig_1	TRUE	877	TRB	TRBV5-4*01	TRBD1*01	TRBJ2-1*01	TRBC1*01	TRUE	TRUE	CASSQGQGSYNEQFF	TGTGCCAGCAGCCAGGGACAGGGCTCCTACAATGAGCAGTTCTTC	8541	4	clonotype1078	clonotype1078_consensus_1	single TCR
CTCCTAGCATCCTAGA-1	TRUE	CTCCTAGCATCCTAGA-1_contig_3	TRUE	625	TRA	TRAV8-4*01	None	TRAJ32*02	TRAC*01	TRUE	TRUE	CAVSDHDGGATNKLIF	TGTGCTGTGAGTGATCACGATGGTGGTGCTACAAACAAGCTCATCTTT	3420	1	clonotype1078	clonotype1078_consensus_2	single TCR
CTCCTAGGTTACGCGC-1	TRUE	CTCCTAGGTTACGCGC-1_contig_1	TRUE	509	TRA	TRAV39*01	None	TRAJ33*01	TRAC*01	TRUE	TRUE	CAVPLYMDSNYQLIW	TGTGCCGTCCCTCTTTACATGGATAGCAACTATCAGTTAATCTGG	7113	2	clonotype1080	clonotype1080_consensus_2	single TCR
CTCCTAGGTTACGCGC-1	TRUE	CTCCTAGGTTACGCGC-1_contig_3	TRUE	916	TRB	TRBV5-6*01	TRBD1*01	TRBJ2-7*01	TRBC2*01	TRUE	TRUE	CASSSQGFYEQYF	TGTGCCAGCAGCTCACAGGGTTTCTACGAGCAGTACTTC	32456	12	clonotype1080	clonotype1080_consensus_1	single TCR
CTCGAGGGTGTGGCTC-1	TRUE	CTCGAGGGTGTGGCTC-1_contig_1	TRUE	500	TRB	TRBV6-5*01	TRBD1*01	TRBJ2-7*01	TRBC2*01	TRUE	TRUE	CASPGKKEPYF	TGTGCCAGCCCAGGGAAAAAGGAACCGTACTTC	2840	1	clonotype1084	clonotype1084_consensus_1	single TCR
CTCGAGGGTGTGGCTC-1	TRUE	CTCGAGGGTGTGGCTC-1_contig_3	TRUE	547	TRA	TRAV30*01	None	TRAJ9*01	TRAC*01	TRUE	TRUE	CGTEGNTGGFKTIF	TGTGGCACAGAAGGAAATACTGGAGGCTTCAAAACTATCTTT	3723	1	clonotype1084	clonotype1084_consensus_2	single TCR
CTCGGAGAGCGATAGC-1	TRUE	CTCGGAGAGCGATAGC-1_contig_1	TRUE	518	TRB	TRBV11-2*03	TRBD2*01	TRBJ2-1*01	TRBC2*01	TRUE	TRUE	CASSPWTSGEQFF	TGTGCCAGCAGCCCATGGACTAGCGGTGAGCAGTTCTTC	7909	2	clonotype1088	clonotype1088_consensus_1	single TCR
CTCGGAGAGCGATAGC-1	TRUE	CTCGGAGAGCGATAGC-1_contig_3	TRUE	487	TRA	TRAV1-2*01	None	TRAJ36*01	TRAC*01	TRUE	TRUE	CAVPGGANNLFF	TGTGCTGTGCCCGGTGGGGCAAACAACCTCTTCTTT	4622	1	clonotype1088	clonotype1088_consensus_2	single TCR
CTCGGAGAGTTGTCGT-1	TRUE	CTCGGAGAGTTGTCGT-1_contig_2	TRUE	706	TRB	TRBV4-1*01	TRBD1*01	TRBJ2-2*01	TRBC2*01	TRUE	TRUE	CASSQVSLVQGQTTGELFF	TGCGCCAGCAGCCAAGTGAGTTTAGTACAAGGCCAAACCACCGGGGAGCTGTTTTTT	12295	4	clonotype1089	clonotype1089_consensus_2	single TCR
CTCGGAGAGTTGTCGT-1	TRUE	CTCGGAGAGTTGTCGT-1_contig_4	TRUE	482	TRA	TRAV13-1*01	None	TRAJ26*01	TRAC*01	TRUE	TRUE	CAATRPDNYGQNFVF	TGTGCAGCAACCCGCCCGGATAACTATGGTCAGAATTTTGTCTTT	3850	1	clonotype1089	clonotype1089_consensus_1	single TCR
CTCGGGAAGAACTGTA-1	TRUE	CTCGGGAAGAACTGTA-1_contig_1	TRUE	496	TRA	TRAV21*01	None	TRAJ15*01	TRAC*01	TRUE	TRUE	CAVDQAGTALIF	TGTGCTGTGGACCAGGCAGGAACTGCTCTGATCTTT	7011	2	clonotype1092	clonotype1092_consensus_1	single TCR
CTCGGGAAGAACTGTA-1	TRUE	CTCGGGAAGAACTGTA-1_contig_2	TRUE	703	TRB	TRBV6-6*02	TRBD1*01	TRBJ1-2*01	TRBC1*01	TRUE	TRUE	CASSWAGDGYTF	TGTGCCAGCAGTTGGGCAGGGGATGGCTACACCTTC	5440	2	clonotype1092	clonotype1092_consensus_2	single TCR
CTCGTACAGATAGGAG-1	TRUE	CTCGTACAGATAGGAG-1_contig_1	TRUE	690	TRB	TRBV3-1*01	None	TRBJ2-7*01	TRBC2*01	TRUE	TRUE	CASSQSSNYEQYF	TGTGCCAGCAGCCAAAGCTCGAACTACGAGCAGTACTTC	15782	5	clonotype1093	clonotype1093_consensus_1	single TCR
CTCGTACAGATAGGAG-1	TRUE	CTCGTACAGATAGGAG-1_contig_2	TRUE	490	TRA	TRAV2*01	None	TRAJ39*01	TRAC*01	TRUE	TRUE	CAVEDNAGNMLTF	TGTGCTGTGGAGGATAATGCAGGCAACATGCTCACCTTT	5455	1	clonotype1093	clonotype1093_consensus_2	single TCR
CTCGTACGTTCAGCGC-1	TRUE	CTCGTACGTTCAGCGC-1_contig_1	TRUE	542	TRA	TRAV13-1*01	None	TRAJ43*01	TRAC*01	TRUE	TRUE	CAASKGNNNDMRF	TGTGCAGCAAGTAAAGGCAATAACAATGACATGCGCTTT	12092	3	clonotype1095	clonotype1095_consensus_2	single TCR
CTCGTACGTTCAGCGC-1	TRUE	CTCGTACGTTCAGCGC-1_contig_2	TRUE	646	TRB	TRBV19*01	None	TRBJ2-3*01	TRBC2*01	TRUE	TRUE	CASSISSSTDTQYF	TGTGCCAGTAGTATTAGTTCTAGCACAGATACGCAGTATTTT	2242	1	clonotype1095	clonotype1095_consensus_1	single TCR
CTCGTACTCGTCTGAA-1	TRUE	CTCGTACTCGTCTGAA-1_contig_1	TRUE	518	TRB	TRBV3-1*01	None	TRBJ2-7*01	TRBC2*01	TRUE	TRUE	CASSQEDPIYEQYF	TGTGCCAGCAGCCAAGAGGACCCTATCTACGAGCAGTACTTC	4664	2	clonotype1097	clonotype1097_consensus_2	single TCR
CTCGTACTCGTCTGAA-1	TRUE	CTCGTACTCGTCTGAA-1_contig_3	TRUE	531	TRA	TRAV5*01	None	TRAJ44*01	TRAC*01	TRUE	TRUE	CASARNTGTASKLTF	TGTGCCTCCGCTCGAAATACCGGCACTGCCAGTAAACTCACCTTT	3836	1	clonotype1097	clonotype1097_consensus_1	single TCR
CTCGTACTCTCAAACG-1	TRUE	CTCGTACTCTCAAACG-1_contig_1	TRUE	491	TRB	TRBV4-1*01	TRBD2*01	TRBJ1-4*01	TRBC1*01	TRUE	TRUE	CASSLKPGLNEKLFF	TGCGCCAGCAGCTTGAAGCCGGGGCTAAATGAAAAACTGTTTTTT	6118	2	clonotype1098	clonotype1098_consensus_1	single TCR
CTCGTACTCTCAAACG-1	TRUE	CTCGTACTCTCAAACG-1_contig_2	TRUE	535	TRA	TRAV20*01	None	TRAJ29*01	TRAC*01	TRUE	TRUE	CAVQATNTPLVF	TGTGCTGTGCAGGCAACGAACACACCTCTTGTCTTT	3962	1	clonotype1098	clonotype1098_consensus_2	single TCR
CTCGTCATCCCTCTTT-1	TRUE	CTCGTCATCCCTCTTT-1_contig_1	TRUE	761	TRB	TRBV18*01	TRBD1*01	TRBJ2-3*01	TRBC2*01	TRUE	TRUE	CASSPRGDREDTQYF	TGTGCCAGCTCACCACGTGGGGACAGGGAGGATACGCAGTATTTT	14964	5	clonotype1100	clonotype1100_consensus_2	single TCR
CTCGTCATCCCTCTTT-1	TRUE	CTCGTCATCCCTCTTT-1_contig_4	TRUE	634	TRA	TRAV3*01	None	TRAJ32*01	TRAC*01	TRUE	TRUE	CAVPKLIF	TGTGCTGTACCCAAGCTCATCTTT	2795	1	clonotype1100	clonotype1100_consensus_1	single TCR
CTCTAATAGAGTGAGA-1	TRUE	CTCTAATAGAGTGAGA-1_contig_1	TRUE	841	TRB	TRBV2*01	TRBD2*01	TRBJ2-5*01	TRBC2*01	TRUE	TRUE	CASSPPGLEETQYF	TGTGCCAGCAGCCCCCCGGGACTAGAAGAGACCCAGTACTTC	4729	3	clonotype1101	clonotype1101_consensus_1	single TCR
CTCTAATAGAGTGAGA-1	TRUE	CTCTAATAGAGTGAGA-1_contig_3	TRUE	522	TRA	TRAV1-1*01	None	TRAJ13*02	TRAC*01	TRUE	TRUE	CAVREAGYQKVTF	TGCGCTGTGAGAGAGGCGGGTTACCAGAAAGTTACCTTT	6941	3	clonotype1101	clonotype1101_consensus_2	single TCR
CTCTAATGTAAGGGAA-1	TRUE	CTCTAATGTAAGGGAA-1_contig_1	TRUE	575	TRA	TRAV29/DV5*01	None	TRAJ49*01	TRAC*01	TRUE	TRUE	CAAHNTGNQFYF	TGTGCAGCACACAACACCGGTAACCAGTTCTATTTT	7760	2	clonotype1104	clonotype1104_consensus_2	single TCR
CTCTAATGTAAGGGAA-1	TRUE	CTCTAATGTAAGGGAA-1_contig_2	TRUE	668	TRB	TRBV28*01	TRBD1*01	TRBJ2-2*01	TRBC1*01	TRUE	TRUE	CASSLAAIGAGGTVGELFF	TGTGCCAGCAGTTTAGCCGCGATCGGGGCAGGGGGAACTGTCGGGGAGCTGTTTTTT	6222	2	clonotype1104	clonotype1104_consensus_1	single TCR
CTCTAATGTGAAAGAG-1	TRUE	CTCTAATGTGAAAGAG-1_contig_1	TRUE	530	TRB	TRBV7-6*01	None	TRBJ1-6*02	TRBC1*01	TRUE	TRUE	CASSSGNSPLHF	TGTGCCAGCAGCTCGGGTAATTCACCCCTCCACTTT	7805	2	clonotype1105	clonotype1105_consensus_2	single TCR
CTCTAATGTGAAAGAG-1	TRUE	CTCTAATGTGAAAGAG-1_contig_2	TRUE	700	TRA	TRAV8-6*02	None	TRAJ52*01	TRAC*01	TRUE	TRUE	CAVISAGGTSYGKLTF	TGTGCTGTGATAAGCGCTGGTGGTACTAGCTATGGAAAGCTGACATTT	2888	1	clonotype1105	clonotype1105_consensus_1	single TCR
CTCTACGAGGCATGGT-1	TRUE	CTCTACGAGGCATGGT-1_contig_1	TRUE	677	TRB	TRBV9*02	TRBD2*02	TRBJ1-1*01	TRBC1*01	TRUE	TRUE	CASSVGVGGTEAFF	TGTGCCAGCAGCGTAGGGGTGGGAGGGACTGAAGCTTTCTTT	15437	5	clonotype1107	clonotype1107_consensus_1	single TCR
CTCTACGAGGCATGGT-1	TRUE	CTCTACGAGGCATGGT-1_contig_3	TRUE	566	TRA	TRAV19*01	None	TRAJ30*01	TRAC*01	TRUE	TRUE	CALLMNRDDKIIF	TGTGCTCTGCTTATGAACAGAGATGACAAGATCATCTTT	3349	1	clonotype1107	clonotype1107_consensus_2	single TCR
CTCTACGGTAAGGGAA-1	TRUE	CTCTACGGTAAGGGAA-1_contig_1	TRUE	539	TRB	TRBV12-4*01	TRBD2*01	TRBJ2-3*01	TRBC2*01	TRUE	TRUE	CASSLRSRLAGRDTQYF	TGTGCCAGCAGTTTGCGTTCAAGACTAGCGGGGAGGGATACGCAGTATTTT	2955	1	clonotype1109	clonotype1109_consensus_2	single TCR
CTCTACGGTAAGGGAA-1	TRUE	CTCTACGGTAAGGGAA-1_contig_3	TRUE	555	TRA	TRAV20*01	None	TRAJ45*01	TRAC*01	TRUE	TRUE	CAVQATESGGGADGLTF	TGTGCTGTGCAGGCTACGGAATCAGGAGGAGGTGCTGACGGACTCACCTTT	5435	2	clonotype1109	clonotype1109_consensus_1	single TCR
CTCTGGTAGTGTTGAA-1	TRUE	CTCTGGTAGTGTTGAA-1_contig_1	TRUE	673	TRA	TRAV10*01	None	TRAJ10*01	TRAC*01	TRUE	TRUE	CVPWGGGGNKLTF	TGTGTCCCCTGGGGGGGAGGAGGAAACAAACTCACCTTT	4329	2	clonotype1115	clonotype1115_consensus_1	single TCR
CTCTGGTAGTGTTGAA-1	TRUE	CTCTGGTAGTGTTGAA-1_contig_2	TRUE	662	TRB	TRBV4-1*01	TRBD1*01	TRBJ1-5*01	TRBC1*01	TRUE	TRUE	CASSPSRAPNQPQHF	TGCGCCAGCAGCCCTTCCAGGGCCCCCAATCAGCCCCAGCATTTT	2865	2	clonotype1115	clonotype1115_consensus_2	single TCR
CTCTGGTGTTGTGGCC-1	TRUE	CTCTGGTGTTGTGGCC-1_contig_1	TRUE	604	TRB	TRBV7-9*01	None	TRBJ2-7*01	TRBC2*01	TRUE	TRUE	CASSLDWAEQYF	TGTGCCAGCAGCTTAGATTGGGCGGAGCAGTACTTC	19853	8	clonotype1117	clonotype1117_consensus_2	single TCR
CTCTGGTGTTGTGGCC-1	TRUE	CTCTGGTGTTGTGGCC-1_contig_2	TRUE	489	TRA	TRAV38-2/DV8*01	None	TRAJ34*01	TRAC*01	TRUE	TRUE	CAYGNTDKLIF	TGTGCTTATGGGAACACCGACAAGCTCATCTTT	3866	1	clonotype1117	clonotype1117_consensus_1	single TCR
CTGAAACAGACGCTTT-1	TRUE	CTGAAACAGACGCTTT-1_contig_1	TRUE	686	TRB	TRBV11-2*03	TRBD2*01	TRBJ1-2*01	TRBC1*01	TRUE	TRUE	CASSLDSSGLTYGYTF	TGTGCCAGCAGCTTAGATTCGTCAGGTCTCACCTATGGCTACACCTTC	3898	1	clonotype1118	clonotype1118_consensus_2	single TCR
CTGAAACAGACGCTTT-1	TRUE	CTGAAACAGACGCTTT-1_contig_3	TRUE	494	TRA	TRAV13-1*01	None	TRAJ8*01	TRAC*01	TRUE	TRUE	CAASFQKLVF	TGTGCAGCCTCGTTTCAGAAACTTGTATTT	4783	1	clonotype1118	clonotype1118_consensus_1	single TCR
CTGAAACAGTATGACA-1	TRUE	CTGAAACAGTATGACA-1_contig_1	TRUE	679	TRB	TRBV19*01	TRBD1*01	TRBJ2-7*01	TRBC2*01	TRUE	TRUE	CASSPTGTHEKEYF	TGTGCCAGTAGTCCCACCGGGACACACGAAAAAGAGTACTTC	4003	3	clonotype1120	clonotype1120_consensus_1	single TCR
CTGAAACAGTATGACA-1	TRUE	CTGAAACAGTATGACA-1_contig_2	TRUE	546	TRA	TRAV12-2*01	None	TRAJ41*01	TRAC*01	TRUE	TRUE	CAVRQSGYALNF	TGTGCCGTGAGGCAGTCCGGGTATGCACTCAACTTC	2876	1	clonotype1120	clonotype1120_consensus_2	single TCR
CTGAAACTCTTACCGC-1	TRUE	CTGAAACTCTTACCGC-1_contig_1	TRUE	670	TRB	TRBV5-6*01	None	TRBJ2-1*01	TRBC2*01	TRUE	TRUE	CASSSRQPSYNEQFF	TGTGCCAGCAGCTCCAGGCAGCCCTCCTACAATGAGCAGTTCTTC	6469	2	clonotype1123	clonotype1123_consensus_2	single TCR
CTGAAACTCTTACCGC-1	TRUE	CTGAAACTCTTACCGC-1_contig_2	TRUE	690	TRA	TRAV8-3*01	None	TRAJ24*02	TRAC*01	TRUE	TRUE	CAVTTDSWGKLQF	TGTGCTGTGACAACTGACAGCTGGGGGAAATTGCAGTTT	9712	2	clonotype1123	clonotype1123_consensus_1	single TCR
CTGAAGTAGAGGTTAT-1	TRUE	CTGAAGTAGAGGTTAT-1_contig_1	TRUE	470	TRB	TRBV28*01	None	TRBJ2-3*01	TRBC2*01	TRUE	TRUE	CASSLPPKVDTQYF	TGTGCCAGCAGTTTACCCCCCAAGGTGGATACGCAGTATTTT	2987	1	clonotype1124	clonotype1124_consensus_1	single TCR
CTGAAGTAGAGGTTAT-1	TRUE	CTGAAGTAGAGGTTAT-1_contig_3	TRUE	525	TRA	TRAV13-1*01	None	TRAJ42*01	TRAC*01	TRUE	TRUE	CASGRGSQGNLIF	TGTGCGTCCGGCAGAGGAAGCCAAGGAAATCTCATCTTT	4320	1	clonotype1124	clonotype1124_consensus_2	single TCR
CTGAAGTTCACCACCT-1	TRUE	CTGAAGTTCACCACCT-1_contig_1	TRUE	701	TRB	TRBV4-1*01	None	TRBJ1-1*01	TRBC1*01	TRUE	TRUE	CAVSSLNEVSSNTEAFF	TGCGCCGTATCATCCCTTAACGAGGTTTCTTCGAACACTGAAGCTTTCTTT	20521	8	clonotype1126	clonotype1126_consensus_1	single TCR
CTGAAGTTCACCACCT-1	TRUE	CTGAAGTTCACCACCT-1_contig_2	TRUE	751	TRA	TRAV5*01	None	TRAJ32*02	TRAC*01	TRUE	TRUE	CAESKGGGATNKLIF	TGTGCAGAGAGTAAGGGTGGTGGTGCTACAAACAAGCTCATCTTT	4360	2	clonotype1126	clonotype1126_consensus_2	single TCR
CTGAAGTTCCAAACAC-1	TRUE	CTGAAGTTCCAAACAC-1_contig_1	TRUE	496	TRA	TRAV17*01	None	TRAJ56*01	TRAC*01	TRUE	TRUE	CATEGNSKLTF	TGTGCTACGGAGGGCAATAGTAAGCTGACATTT	4118	1	clonotype1127	clonotype1127_consensus_1	single TCR
CTGAAGTTCCAAACAC-1	TRUE	CTGAAGTTCCAAACAC-1_contig_2	TRUE	650	TRB	TRBV28*01	TRBD2*02	TRBJ2-7*01	TRBC2*01	TRUE	TRUE	CASRSPRLAGGINEQYF	TGTGCCAGCAGAAGTCCTCGGCTAGCGGGAGGTATAAACGAGCAGTACTTC	3402	1	clonotype1127	clonotype1127_consensus_2	single TCR
CTGATAGCATTAGCCA-1	TRUE	CTGATAGCATTAGCCA-1_contig_2	TRUE	689	TRB	TRBV3-1*01	TRBD2*02	TRBJ2-1*01	TRBC2*01	TRUE	TRUE	CASSLLAGGTQFF	TGTGCCAGCAGCCTTCTAGCGGGAGGGACGCAGTTCTTC	2981	1	clonotype1132	clonotype1132_consensus_2	single TCR
CTGATAGCATTAGCCA-1	TRUE	CTGATAGCATTAGCCA-1_contig_5	TRUE	513	TRA	TRAV13-1*01	None	TRAJ42*01	TRAC*01	TRUE	TRUE	CAALYGGSQGNLIF	TGTGCAGCCCTTTATGGAGGAAGCCAAGGAAATCTCATCTTT	3152	1	clonotype1132	clonotype1132_consensus_1	single TCR
CTGATAGTCCGCGCAA-1	TRUE	CTGATAGTCCGCGCAA-1_contig_1	TRUE	514	TRA	TRAV21*01	None	TRAJ6*01	TRAC*01	TRUE	TRUE	CAVEPGGSYIPTF	TGTGCTGTGGAGCCAGGAGGAAGCTACATACCTACATTT	7289	2	clonotype1134	clonotype1134_consensus_1	single TCR
CTGATAGTCCGCGCAA-1	TRUE	CTGATAGTCCGCGCAA-1_contig_2	TRUE	666	TRB	TRBV5-1*01	TRBD1*01	TRBJ2-2*01	TRBC2*01	TRUE	TRUE	CASSLGGLRSAGELFF	TGCGCCAGCAGCTTGGGGGGCCTCCGTTCGGCCGGGGAGCTGTTTTTT	2553	1	clonotype1134	clonotype1134_consensus_2	single TCR
CTGATCCTCGGCGCTA-1	TRUE	CTGATCCTCGGCGCTA-1_contig_1	TRUE	655	TRB	TRBV10-3*01	TRBD1*01	TRBJ2-5*01	TRBC2*01	TRUE	TRUE	CAISDWEGGTQYF	TGTGCCATCAGTGATTGGGAAGGGGGCACCCAGTACTTC	16136	6	clonotype1140	clonotype1140_consensus_2	single TCR
CTGATCCTCGGCGCTA-1	TRUE	CTGATCCTCGGCGCTA-1_contig_3	TRUE	529	TRA	TRAV29/DV5*01	None	TRAJ53*01	TRAC*01	TRUE	TRUE	CAASGKSSGGSNYKLTF	TGTGCAGCAAGCGGAAAGTCCAGTGGAGGTAGCAACTATAAACTGACATTT	3565	1	clonotype1140	clonotype1140_consensus_1	single TCR
CTGCCTACAGAGTGTG-1	TRUE	CTGCCTACAGAGTGTG-1_contig_1	TRUE	695	TRB	TRBV4-1*01	None	TRBJ1-1*01	TRBC1*01	TRUE	TRUE	CASSPGTQMNTEAFF	TGCGCCAGCAGCCCCGGAACGCAGATGAACACTGAAGCTTTCTTT	10419	5	clonotype1143	clonotype1143_consensus_1	single TCR
CTGCCTACAGAGTGTG-1	TRUE	CTGCCTACAGAGTGTG-1_contig_2	TRUE	554	TRA	TRAV12-2*01	None	TRAJ4*01	TRAC*01	TRUE	TRUE	CAVTRFSGGYNKLIF	TGTGCCGTGACAAGGTTTTCTGGTGGCTACAATAAGCTGATTTTT	2076	1	clonotype1143	clonotype1143_consensus_2	single TCR
CTGCCTATCTCATTCA-1	TRUE	CTGCCTATCTCATTCA-1_contig_1	TRUE	517	TRB	TRBV27*01	TRBD1*01	TRBJ1-2*01	TRBC1*01	TRUE	TRUE	CASSLGAGGIYGYTF	TGTGCCAGCAGTTTAGGGGCAGGGGGCATCTATGGCTACACCTTC	2109	1	clonotype1146	clonotype1146_consensus_1	single TCR
CTGCCTATCTCATTCA-1	TRUE	CTGCCTATCTCATTCA-1_contig_3	TRUE	706	TRA	TRAV8-3*01	None	TRAJ49*01	TRAC*01	TRUE	TRUE	CAVGPTGNQFYF	TGTGCTGTGGGTCCAACCGGTAACCAGTTCTATTTT	6385	2	clonotype1146	clonotype1146_consensus_2	single TCR
CTGCGGAAGTTTGCGT-1	TRUE	CTGCGGAAGTTTGCGT-1_contig_1	TRUE	728	TRB	TRBV2*01	TRBD2*02	TRBJ2-1*01	TRBC2*01	TRUE	TRUE	CASGGEGNEQFF	TGTGCCAGCGGAGGCGAGGGTAATGAGCAGTTCTTC	14308	5	clonotype1147	clonotype1147_consensus_2	single TCR
CTGCGGAAGTTTGCGT-1	TRUE	CTGCGGAAGTTTGCGT-1_contig_2	TRUE	564	TRA	TRAV22*01	None	TRAJ45*01	TRAC*01	TRUE	TRUE	CAVGSADGLTF	TGTGCTGTGGGTTCTGCTGACGGACTCACCTTT	7031	2	clonotype1147	clonotype1147_consensus_1	single TCR
CTGCTGTCAACGATCT-1	TRUE	CTGCTGTCAACGATCT-1_contig_1	TRUE	666	TRB	TRBV4-2*01	TRBD2*01	TRBJ2-1*01	TRBC2*01	TRUE	TRUE	CASSQDSGRGVYNEQFF	TGTGCCAGCAGCCAAGATTCGGGGCGGGGTGTCTACAATGAGCAGTTCTTC	5776	2	clonotype1149	clonotype1149_consensus_2	single TCR
CTGCTGTCAACGATCT-1	TRUE	CTGCTGTCAACGATCT-1_contig_2	TRUE	500	TRA	TRAV38-2/DV8*01	None	TRAJ42*01	TRAC*01	TRUE	TRUE	CAYRFYGGSQGNLIF	TGTGCTTATAGGTTTTATGGAGGAAGCCAAGGAAATCTCATCTTT	3283	1	clonotype1149	clonotype1149_consensus_1	single TCR
CTGCTGTCATCGGAAG-1	TRUE	CTGCTGTCATCGGAAG-1_contig_1	TRUE	522	TRA	TRAV30*01	None	TRAJ13*02	TRAC*01	TRUE	TRUE	CGTGGGSGGYQKVTF	TGTGGCACAGGGGGAGGATCTGGGGGTTACCAGAAAGTTACCTTT	5969	2	clonotype1150	clonotype1150_consensus_1	single TCR
CTGCTGTCATCGGAAG-1	TRUE	CTGCTGTCATCGGAAG-1_contig_2	TRUE	785	TRB	TRBV6-6*02	TRBD2*01	TRBJ2-7*01	TRBC2*01	TRUE	TRUE	CASSYFGESYEQYF	TGTGCCAGCAGTTACTTCGGGGAATCCTACGAGCAGTACTTC	21253	9	clonotype1150	clonotype1150_consensus_2	single TCR
CTGTGCTAGGGATACC-1	TRUE	CTGTGCTAGGGATACC-1_contig_1	TRUE	679	TRB	TRBV7-3*01	TRBD1*01	TRBJ1-6*01	TRBC1*01	TRUE	TRUE	CASSSGQINSPLHF	TGTGCCAGCAGCTCCGGACAGATAAATTCACCCCTCCACTTT	3169	1	clonotype1157	clonotype1157_consensus_2	single TCR
CTGTGCTAGGGATACC-1	TRUE	CTGTGCTAGGGATACC-1_contig_2	TRUE	537	TRA	TRAV26-1*01	None	TRAJ52*01	TRAC*01	TRUE	TRUE	CIVRVSAGGTSYGKLTF	TGCATCGTCAGAGTCAGTGCTGGTGGTACTAGCTATGGAAAGCTGACATTT	3379	1	clonotype1157	clonotype1157_consensus_1	single TCR
CTGTTTACAACAACCT-1	TRUE	CTGTTTACAACAACCT-1_contig_1	TRUE	525	TRA	TRAV38-2/DV8*01	None	TRAJ37*01	TRAC*01	TRUE	TRUE	CAYRSNSGNTGKLIF	TGTGCTTATAGGAGCAACTCTGGCAACACAGGCAAACTAATCTTT	12078	4	clonotype1159	clonotype1159_consensus_2	single TCR
CTGTTTACAACAACCT-1	TRUE	CTGTTTACAACAACCT-1_contig_2	TRUE	502	TRB	TRBV2*01	TRBD1*01	TRBJ1-1*01	TRBC1*01	TRUE	TRUE	CASSASRGPTEAFF	TGTGCCAGCAGCGCAAGCAGGGGGCCAACTGAAGCTTTCTTT	444	1	clonotype1159	clonotype1159_consensus_1	single TCR
CTGTTTATCTTACCTA-1	TRUE	CTGTTTATCTTACCTA-1_contig_1	TRUE	683	TRA	TRAV8-2*01	None	TRAJ8*01	TRAC*01	TRUE	TRUE	CVVRTIMNTGFQKLVF	TGTGTTGTGAGGACTATCATGAACACAGGCTTTCAGAAACTTGTATTT	8274	3	clonotype1161	clonotype1161_consensus_1	single TCR
CTGTTTATCTTACCTA-1	TRUE	CTGTTTATCTTACCTA-1_contig_2	TRUE	534	TRB	TRBV4-1*01	TRBD2*01	TRBJ2-3*01	TRBC2*01	TRUE	TRUE	CASSQDILTSGNTQYF	TGCGCCAGCAGCCAAGATATACTAACCTCGGGGAATACGCAGTATTTT	7673	3	clonotype1161	clonotype1161_consensus_2	single TCR
CTTAACTGTGATGCCC-1	TRUE	CTTAACTGTGATGCCC-1_contig_1	TRUE	675	TRA	TRAV9-2*01	None	TRAJ20*01	TRAC*01	TRUE	TRUE	CALNDYKLSF	TGTGCTCTGAACGACTACAAGCTCAGCTTT	9614	2	clonotype1163	clonotype1163_consensus_2	single TCR
CTTAACTGTGATGCCC-1	TRUE	CTTAACTGTGATGCCC-1_contig_2	TRUE	680	TRB	TRBV7-9*01	TRBD1*01	TRBJ1-1*01	TRBC1*01	TRUE	TRUE	CASSLADRGNTEAFF	TGTGCCAGCAGCTTGGCCGACAGGGGGAACACTGAAGCTTTCTTT	17472	5	clonotype1163	clonotype1163_consensus_1	single TCR
CTTAACTTCTCACATT-1	TRUE	CTTAACTTCTCACATT-1_contig_1	TRUE	562	TRB	TRBV5-1*01	TRBD2*01	TRBJ2-3*01	TRBC2*01	TRUE	TRUE	CASSSGVGDTQYF	TGCGCCAGCAGCTCGGGCGTGGGAGATACGCAGTATTTT	8788	3	clonotype1164	clonotype1164_consensus_2	single TCR
CTTAACTTCTCACATT-1	TRUE	CTTAACTTCTCACATT-1_contig_2	TRUE	481	TRA	TRAV21*01	None	TRAJ36*01	TRAC*01	TRUE	TRUE	CAVETGANNLFF	TGTGCTGTCGAAACTGGGGCAAACAACCTCTTCTTT	4122	1	clonotype1164	clonotype1164_consensus_1	single TCR
CTTACCGGTTACGACT-1	TRUE	CTTACCGGTTACGACT-1_contig_1	TRUE	707	TRB	TRBV6-6*02	TRBD1*01	TRBJ2-7*01	TRBC2*01	TRUE	TRUE	CASRKRDIYEQYF	TGTGCCAGCAGGAAACGGGACATATACGAGCAGTACTTC	15577	5	clonotype1168	clonotype1168_consensus_1	single TCR
CTTACCGGTTACGACT-1	TRUE	CTTACCGGTTACGACT-1_contig_2	TRUE	675	TRA	TRAV38-2/DV8*01	None	TRAJ15*01	TRAC*01	TRUE	TRUE	CAYRSANQAGTALIF	TGTGCTTATAGGAGCGCCAACCAGGCAGGAACTGCTCTGATCTTT	13860	4	clonotype1168	clonotype1168_consensus_2	single TCR
CTTACCGTCAGCTTAG-1	TRUE	CTTACCGTCAGCTTAG-1_contig_1	TRUE	497	TRA	TRAV10*01	None	TRAJ24*02	TRAC*01	TRUE	TRUE	CVVSAGTDSWGKLQF	TGTGTGGTGAGCGCGGGAACTGACAGCTGGGGGAAATTGCAGTTT	8785	2	clonotype1170	clonotype1170_consensus_1	single TCR
CTTACCGTCAGCTTAG-1	TRUE	CTTACCGTCAGCTTAG-1_contig_3	TRUE	709	TRB	TRBV27*01	TRBD1*01	TRBJ2-3*01	TRBC2*01	TRUE	TRUE	CASSLDATGLGGTDTQYF	TGTGCCAGCAGTTTAGACGCGACAGGGCTAGGGGGCACAGATACGCAGTATTTT	5550	2	clonotype1170	clonotype1170_consensus_2	single TCR
CTTACCGTCCATGAGT-1	TRUE	CTTACCGTCCATGAGT-1_contig_1	TRUE	728	TRB	TRBV6-1*01	None	TRBJ1-5*01	TRBC1*01	TRUE	TRUE	CASSETPYQPQHF	TGTGCCAGCAGTGAAACCCCATATCAGCCCCAGCATTTT	24146	9	clonotype1171	clonotype1171_consensus_1	single TCR
CTTACCGTCCATGAGT-1	TRUE	CTTACCGTCCATGAGT-1_contig_3	TRUE	564	TRA	TRAV12-1*01	None	TRAJ10*01	TRAC*01	TRUE	TRUE	CVVNGILTGGGNKLTF	TGTGTGGTGAACGGGATACTCACGGGAGGAGGAAACAAACTCACCTTT	6916	2	clonotype1171	clonotype1171_consensus_2	single TCR
CTTAGGAAGGTAAACT-1	TRUE	CTTAGGAAGGTAAACT-1_contig_2	TRUE	839	TRB	TRBV5-4*01	TRBD1*01	TRBJ1-2*01	TRBC1*01	TRUE	TRUE	CASSLLDRGHYGYTF	TGTGCCAGCAGCTTACTCGACAGGGGGCACTATGGCTACACCTTC	3008	1	clonotype1172	clonotype1172_consensus_2	single TCR
CTTAGGAAGGTAAACT-1	TRUE	CTTAGGAAGGTAAACT-1_contig_3	TRUE	585	TRA	TRAV29/DV5*01	None	TRAJ52*01	TRAC*01	TRUE	TRUE	CAATLAGGTSYGKLTF	TGTGCAGCAACCCTTGCTGGTGGTACTAGCTATGGAAAGCTGACATTT	2732	1	clonotype1172	clonotype1172_consensus_1	single TCR
CTTAGGAGTGTTTGGT-1	TRUE	CTTAGGAGTGTTTGGT-1_contig_1	TRUE	496	TRA	TRAV38-2/DV8*01	None	TRAJ40*01	TRAC*01	TRUE	TRUE	CAYRPSGTYKYIF	TGTGCTTATAGGCCCTCAGGAACCTACAAATACATCTTT	4299	1	clonotype1175	clonotype1175_consensus_2	single TCR
CTTAGGAGTGTTTGGT-1	TRUE	CTTAGGAGTGTTTGGT-1_contig_2	TRUE	689	TRB	TRBV12-3*01	TRBD1*01	TRBJ1-2*01	TRBC1*01	TRUE	TRUE	CASNLTPTGDSYGYTF	TGTGCCAGCAACCTTACCCCTACCGGGGACAGCTATGGCTACACCTTC	9909	4	clonotype1175	clonotype1175_consensus_1	single TCR
CTTAGGATCTGTCAAG-1	TRUE	CTTAGGATCTGTCAAG-1_contig_1	TRUE	570	TRB	TRBV27*01	TRBD2*01	TRBJ1-5*01	TRBC1*01	TRUE	TRUE	CASSLRGGSPVDQPQHF	TGTGCCAGCAGTTTGAGGGGGGGCTCCCCGGTGGATCAGCCCCAGCATTTT	17173	5	clonotype1177	clonotype1177_consensus_2	single TCR
CTTAGGATCTGTCAAG-1	TRUE	CTTAGGATCTGTCAAG-1_contig_2	TRUE	478	TRA	TRAV21*01	None	TRAJ18*01	TRAC*01	TRUE	TRUE	CAVKSRGSTLGRLYF	TGTGCTGTGAAGAGCCGAGGCTCAACCCTGGGGAGGCTATACTTT	4562	1	clonotype1177	clonotype1177_consensus_1	single TCR
CTTAGGATCTTAGAGC-1	TRUE	CTTAGGATCTTAGAGC-1_contig_2	TRUE	662	TRB	TRBV27*01	TRBD2*01	TRBJ2-3*01	TRBC2*01	TRUE	TRUE	CASSFHGTSGLRVDTQYF	TGTGCCAGCAGTTTTCACGGGACTAGCGGCCTCCGGGTGGATACGCAGTATTTT	3247	1	clonotype1178	clonotype1178_consensus_1	single TCR
CTTAGGATCTTAGAGC-1	TRUE	CTTAGGATCTTAGAGC-1_contig_3	TRUE	616	TRA	TRAV8-3*01	None	TRAJ24*02	TRAC*01	TRUE	TRUE	CAVGPTTDSWGKLQF	TGTGCTGTGGGCCCGACAACTGACAGCTGGGGGAAATTGCAGTTT	4390	2	clonotype1178	clonotype1178_consensus_2	single TCR
CTTCTCTAGGTCATCT-1	TRUE	CTTCTCTAGGTCATCT-1_contig_1	TRUE	825	TRB	TRBV5-6*01	TRBD2*01	TRBJ2-1*01	TRBC2*01	TRUE	TRUE	CASSSAGVEFF	TGTGCCAGCAGCTCAGCGGGTGTAGAGTTCTTC	21234	7	clonotype1179	clonotype1179_consensus_1	single TCR
CTTCTCTAGGTCATCT-1	TRUE	CTTCTCTAGGTCATCT-1_contig_2	TRUE	556	TRA	TRAV10*01	None	TRAJ24*02	TRAC*01	TRUE	TRUE	CVVGRRADSWGKLQF	TGTGTGGTGGGCCGAAGGGCTGACAGCTGGGGGAAATTGCAGTTT	13709	3	clonotype1179	clonotype1179_consensus_2	single TCR
CTTCTCTAGTAGGTGC-1	TRUE	CTTCTCTAGTAGGTGC-1_contig_1	TRUE	703	TRA	TRAV8-3*01	None	TRAJ43*01	TRAC*01	TRUE	TRUE	CAVGPYNNNDMRF	TGTGCTGTGGGCCCTTACAATAACAATGACATGCGCTTT	3481	1	clonotype1180	clonotype1180_consensus_1	single TCR
CTTCTCTAGTAGGTGC-1	TRUE	CTTCTCTAGTAGGTGC-1_contig_2	TRUE	669	TRB	TRBV15*01	TRBD1*01	TRBJ1-1*01	TRBC1*01	TRUE	TRUE	CATSRGAGGNTEAFF	TGTGCCACCAGCAGAGGGGCAGGGGGAAATACTGAAGCTTTCTTT	3477	1	clonotype1180	clonotype1180_consensus_2	single TCR
CTTCTCTGTGCTGTAT-1	TRUE	CTTCTCTGTGCTGTAT-1_contig_1	TRUE	543	TRA	TRAV14/DV4*01	None	TRAJ54*01	TRAC*01	TRUE	TRUE	CAMRGLIIQGAQKLVF	TGTGCAATGAGAGGGTTGATTATTCAGGGAGCCCAGAAGCTGGTATTT	3561	1	clonotype1183	clonotype1183_consensus_1	single TCR
CTTCTCTGTGCTGTAT-1	TRUE	CTTCTCTGTGCTGTAT-1_contig_2	TRUE	683	TRB	TRBV7-9*01	None	TRBJ1-3*01	TRBC1*01	TRUE	TRUE	CASSLDGYSGNTIYF	TGTGCCAGCAGCTTAGATGGGTACTCTGGAAACACCATATATTTT	6919	3	clonotype1183	clonotype1183_consensus_2	single TCR
CTTCTCTTCAAACGGG-1	TRUE	CTTCTCTTCAAACGGG-1_contig_1	TRUE	519	TRA	TRAV20*01	None	TRAJ53*01	TRAC*01	TRUE	TRUE	CAVQAGGSNYKLTF	TGTGCTGTGCAGGCGGGAGGTAGCAACTATAAACTGACATTT	12640	3	clonotype1184	clonotype1184_consensus_1	single TCR
CTTCTCTTCAAACGGG-1	TRUE	CTTCTCTTCAAACGGG-1_contig_2	TRUE	838	TRB	TRBV5-4*01	TRBD1*01	TRBJ1-2*01	TRBC1*01	TRUE	TRUE	CASRPGDLYGYTF	TGTGCCAGCAGACCCGGGGACCTATATGGCTACACCTTC	7205	4	clonotype1184	clonotype1184_consensus_2	single TCR
CTTGGCTAGAACAATC-1	TRUE	CTTGGCTAGAACAATC-1_contig_2	TRUE	522	TRB	TRBV5-1*01	TRBD1*01	TRBJ1-2*01	TRBC1*01	TRUE	TRUE	CASSPGVGTGPGYGYTF	TGCGCCAGCAGCCCCGGGGTGGGTACAGGTCCGGGATATGGCTACACCTTC	1882	1	clonotype1185	clonotype1185_consensus_1	single TCR
CTTGGCTAGAACAATC-1	TRUE	CTTGGCTAGAACAATC-1_contig_3	TRUE	566	TRA	TRAV12-3*01	None	TRAJ45*01	TRAC*01	TRUE	TRUE	CAMSDGYSGGGADGLTF	TGTGCAATGAGCGATGGGTATTCAGGAGGAGGTGCTGACGGACTCACCTTT	3924	1	clonotype1185	clonotype1185_consensus_2	single TCR
CTTGGCTTCGGCCGAT-1	TRUE	CTTGGCTTCGGCCGAT-1_contig_1	TRUE	512	TRA	TRAV17*01	None	TRAJ44*01	TRAC*01	TRUE	TRUE	CATYTGTASKLTF	TGTGCTACCTATACCGGCACTGCCAGTAAACTCACCTTT	2929	1	clonotype3	clonotype3_consensus_2	single TCR
CTTGGCTTCGGCCGAT-1	TRUE	CTTGGCTTCGGCCGAT-1_contig_2	TRUE	711	TRB	TRBV30*01	None	TRBJ1-1*01	TRBC1*01	TRUE	TRUE	CAWRSAGSEAFF	TGTGCCTGGAGATCGGCCGGCTCTGAAGCTTTCTTT	2304	1	clonotype3	clonotype3_consensus_1	single TCR
CTTTGCGGTGTGTGCC-1	TRUE	CTTTGCGGTGTGTGCC-1_contig_1	TRUE	683	TRA	TRAV8-3*01	None	TRAJ23*01	TRAC*01	TRUE	TRUE	CAIVLYNQGGKLIF	TGTGCTATAGTTCTTTATAACCAGGGAGGAAAGCTTATCTTC	1014	1	clonotype1187	clonotype1187_consensus_2	single TCR
CTTTGCGGTGTGTGCC-1	TRUE	CTTTGCGGTGTGTGCC-1_contig_3	TRUE	474	TRB	TRBV2*01	None	TRBJ2-5*01	TRBC2*01	TRUE	TRUE	CASSAVQPVRAQYF	TGTGCCAGCAGTGCCGTTCAACCCGTTCGCGCCCAGTACTTC	3009	1	clonotype1187	clonotype1187_consensus_1	single TCR
CTTTGCGTCGCCGTGA-1	TRUE	CTTTGCGTCGCCGTGA-1_contig_1	TRUE	681	TRB	TRBV10-1*01	TRBD2*02	TRBJ1-6*01	TRBC1*01	TRUE	TRUE	CASSEYGEGSPLHF	TGCGCCAGCAGTGAATATGGGGAGGGTTCACCCCTCCACTTT	9481	3	clonotype1188	clonotype1188_consensus_2	single TCR
CTTTGCGTCGCCGTGA-1	TRUE	CTTTGCGTCGCCGTGA-1_contig_3	TRUE	563	TRA	TRAV19*01	None	TRAJ6*01	TRAC*01	TRUE	TRUE	CALRGGSYIPTF	TGTGCTCTGAGAGGGGGAAGCTACATACCTACATTT	3713	1	clonotype1188	clonotype1188_consensus_1	single TCR
CTTTGCGTCTCTTATG-1	TRUE	CTTTGCGTCTCTTATG-1_contig_1	TRUE	674	TRB	TRBV15*01	TRBD1*01	TRBJ1-4*01	TRBC1*01	TRUE	TRUE	CATSSPGQLEKLFF	TGTGCCACCAGCAGTCCGGGACAGCTTGAAAAACTGTTTTTT	9665	3	clonotype1189	clonotype1189_consensus_1	single TCR
CTTTGCGTCTCTTATG-1	TRUE	CTTTGCGTCTCTTATG-1_contig_2	TRUE	723	TRA	TRAV23/DV6*01	None	TRAJ11*01	TRAC*01	TRUE	TRUE	CAASIRSGYSTLTF	TGTGCAGCAAGCATAAGATCAGGATACAGCACCCTCACCTTT	3273	1	clonotype1189	clonotype1189_consensus_2	single TCR
GAAACTCTCAGAGGTG-1	TRUE	GAAACTCTCAGAGGTG-1_contig_1	TRUE	598	TRA	TRAV26-1*01	None	TRAJ45*01	TRAC*01	TRUE	TRUE	CIIKLKSGGGADGLTF	TGCATCATCAAACTCAAATCAGGAGGAGGTGCTGACGGACTCACCTTT	6136	2	clonotype1191	clonotype1191_consensus_1	single TCR
GAAACTCTCAGAGGTG-1	TRUE	GAAACTCTCAGAGGTG-1_contig_2	TRUE	645	TRB	TRBV28*01	TRBD1*01	TRBJ1-2*01	TRBC1*01	TRUE	TRUE	CASSTPGLPNYGYTF	TGTGCCAGCAGTACCCCAGGGTTACCGAACTATGGCTACACCTTC	7012	2	clonotype1191	clonotype1191_consensus_2	single TCR
GAACATCCAACTGCGC-1	TRUE	GAACATCCAACTGCGC-1_contig_1	TRUE	699	TRB	TRBV3-1*01	TRBD1*01	TRBJ2-2*01	TRBC2*01	TRUE	TRUE	CASSQGAGGNTGELFF	TGTGCCAGCAGCCAAGGGGCAGGGGGCAACACCGGGGAGCTGTTTTTT	13672	5	clonotype1194	clonotype1194_consensus_2	single TCR
GAACATCCAACTGCGC-1	TRUE	GAACATCCAACTGCGC-1_contig_2	TRUE	564	TRA	TRAV12-2*01	None	TRAJ45*01	TRAC*01	TRUE	TRUE	CAVILWVRTGGGADGLTF	TGTGCCGTGATTCTTTGGGTCCGGACAGGAGGAGGTGCTGACGGACTCACCTTT	6816	2	clonotype1194	clonotype1194_consensus_1	single TCR
GAACATCCAGTCGATT-1	TRUE	GAACATCCAGTCGATT-1_contig_1	TRUE	533	TRB	TRBV7-2*01	TRBD2*01	TRBJ2-1*01	TRBC2*01	TRUE	TRUE	CASSLDVGGGAYNEQFF	TGTGCCAGCAGCTTAGACGTAGGCGGCGGGGCCTACAATGAGCAGTTCTTC	6271	2	clonotype1195	clonotype1195_consensus_1	single TCR
GAACATCCAGTCGATT-1	TRUE	GAACATCCAGTCGATT-1_contig_2	TRUE	672	TRA	TRAV3*01	None	TRAJ28*01	TRAC*01	TRUE	TRUE	CAVRGLYSGAGSYQLTF	TGTGCTGTGAGAGGCCTCTACTCTGGGGCTGGGAGTTACCAACTCACTTTC	3360	1	clonotype1195	clonotype1195_consensus_2	single TCR
GAACATCGTACCCAAT-1	TRUE	GAACATCGTACCCAAT-1_contig_1	TRUE	692	TRA	TRAV3*01	None	TRAJ9*01	TRAC*01	TRUE	TRUE	CAVRDDSTGGFKTIF	TGTGCTGTGAGAGACGATAGTACTGGAGGCTTCAAAACTATCTTT	7050	3	clonotype1196	clonotype1196_consensus_1	single TCR
GAACATCGTACCCAAT-1	TRUE	GAACATCGTACCCAAT-1_contig_3	TRUE	720	TRB	TRBV2*01	TRBD2*02	TRBJ2-7*01	TRBC2*01	TRUE	TRUE	CASRGLAGGAYEQYF	TGTGCCAGCAGGGGACTAGCGGGAGGGGCCTACGAGCAGTACTTC	12615	4	clonotype1196	clonotype1196_consensus_2	single TCR
GAACATCTCGTTGCCT-1	TRUE	GAACATCTCGTTGCCT-1_contig_1	TRUE	708	TRA	TRAV21*01	None	TRAJ57*01	TRAC*01	TRUE	TRUE	CAVRKGGSEKLVF	TGTGCTGTGAGGAAGGGCGGATCTGAAAAGCTGGTCTTT	14073	3	clonotype1197	clonotype1197_consensus_1	single TCR
GAACATCTCGTTGCCT-1	TRUE	GAACATCTCGTTGCCT-1_contig_2	TRUE	702	TRB	TRBV13*01	TRBD2*01	TRBJ2-5*01	TRBC2*01	TRUE	TRUE	CASSLGSLAETQYF	TGTGCCAGCAGCTTAGGTAGCTTAGCGGAGACCCAGTACTTC	26433	8	clonotype1197	clonotype1197_consensus_2	single TCR
GAACCTAGTGATAAAC-1	TRUE	GAACCTAGTGATAAAC-1_contig_1	TRUE	679	TRB	TRBV5-1*01	None	TRBJ1-1*01	TRBC1*01	TRUE	TRUE	CASSLRQDTEAFF	TGCGCCAGCAGCTTGCGCCAGGACACTGAAGCTTTCTTT	49061	14	clonotype1199	clonotype1199_consensus_2	single TCR
GAACCTAGTGATAAAC-1	TRUE	GAACCTAGTGATAAAC-1_contig_2	TRUE	705	TRA	TRAV13-2*01	None	TRAJ39*01	TRAC*01	TRUE	TRUE	CAEINNAGNMLTF	TGTGCAGAGATCAATAATGCAGGCAACATGCTCACCTTT	17585	6	clonotype1199	clonotype1199_consensus_1	single TCR
GAACGGACACAGCGTC-1	TRUE	GAACGGACACAGCGTC-1_contig_1	TRUE	689	TRA	TRAV8-4*01	None	TRAJ52*01	TRAC*01	TRUE	TRUE	CAVSTAGGTSYGKLTF	TGTGCTGTGAGTACCGCTGGTGGTACTAGCTATGGAAAGCTGACATTT	7437	3	clonotype1202	clonotype1202_consensus_2	single TCR
GAACGGACACAGCGTC-1	TRUE	GAACGGACACAGCGTC-1_contig_2	TRUE	835	TRB	TRBV5-6*01	TRBD2*02	TRBJ2-5*01	TRBC2*01	TRUE	TRUE	CASSRRLKTSGRVQETQYF	TGTGCCAGCAGCCGAAGGCTAAAGACTAGCGGGAGGGTTCAAGAGACCCAGTACTTC	6163	3	clonotype1202	clonotype1202_consensus_1	single TCR
GAAGCAGCATGCCTAA-1	TRUE	GAAGCAGCATGCCTAA-1_contig_1	TRUE	448	TRA	TRAV38-1*01	None	TRAJ48*01	TRAC*01	TRUE	TRUE	CAFMKRGAFGNEKLTF	TGTGCTTTCATGAAGAGGGGAGCCTTTGGAAATGAGAAATTAACCTTT	4594	2	clonotype1205	clonotype1205_consensus_2	single TCR
GAAGCAGCATGCCTAA-1	TRUE	GAAGCAGCATGCCTAA-1_contig_3	TRUE	698	TRB	TRBV7-2*01	TRBD2*01	TRBJ2-3*01	TRBC2*01	TRUE	TRUE	CASSLGRGRGGADTQYF	TGTGCCAGCAGCTTGGGGCGGGGGCGGGGCGGTGCAGATACGCAGTATTTT	20708	7	clonotype1205	clonotype1205_consensus_1	single TCR
GAAGCAGGTAGCGCTC-1	TRUE	GAAGCAGGTAGCGCTC-1_contig_1	TRUE	676	TRB	TRBV5-1*01	TRBD1*01	TRBJ2-1*01	TRBC2*01	TRUE	TRUE	CASRTAVYNEQFF	TGCGCCAGCCGGACAGCCGTCTACAATGAGCAGTTCTTC	26030	8	clonotype1206	clonotype1206_consensus_1	single TCR
GAAGCAGGTAGCGCTC-1	TRUE	GAAGCAGGTAGCGCTC-1_contig_2	TRUE	594	TRA	TRAV41*01	None	TRAJ58*01	TRAC*01	TRUE	TRUE	CAVVKQETSGSRLTF	TGTGCTGTAGTAAAGCAAGAAACCAGTGGCTCTAGGTTGACCTTT	4533	2	clonotype1206	clonotype1206_consensus_2	single TCR
GAAGCAGGTCTCATCC-1	TRUE	GAAGCAGGTCTCATCC-1_contig_1	TRUE	510	TRA	TRAV4*01	None	TRAJ32*02	TRAC*01	TRUE	TRUE	CLVGDNGGATNKLIF	TGCCTCGTGGGTGATAATGGTGGTGCTACAAACAAGCTCATCTTT	4011	1	clonotype1207	clonotype1207_consensus_1	single TCR
GAAGCAGGTCTCATCC-1	TRUE	GAAGCAGGTCTCATCC-1_contig_2	TRUE	498	TRB	TRBV5-6*01	TRBD2*01	TRBJ2-3*01	TRBC2*01	TRUE	TRUE	CASTPRGGGTDTQYF	TGTGCCAGCACCCCGCGGGGGGGCGGTACAGATACGCAGTATTTT	6547	2	clonotype1207	clonotype1207_consensus_2	single TCR
GAAGCAGGTGCTGTAT-1	TRUE	GAAGCAGGTGCTGTAT-1_contig_1	TRUE	655	TRB	TRBV4-1*01	None	TRBJ1-2*01	TRBC1*01	TRUE	TRUE	CASSQGGRYGYTF	TGCGCCAGCAGCCAAGGTGGCCGCTATGGCTACACCTTC	14846	6	clonotype1209	clonotype1209_consensus_2	single TCR
GAAGCAGGTGCTGTAT-1	TRUE	GAAGCAGGTGCTGTAT-1_contig_2	TRUE	553	TRA	TRAV5*01	None	TRAJ32*02	TRAC*01	TRUE	TRUE	CAETGGATNKLIF	TGTGCAGAAACCGGTGGTGCTACAAACAAGCTCATCTTT	3407	1	clonotype1209	clonotype1209_consensus_1	single TCR
GAAGCAGTCTTGTCAT-1	TRUE	GAAGCAGTCTTGTCAT-1_contig_1	TRUE	662	TRB	TRBV2*01	TRBD1*01	TRBJ1-1*01	TRBC1*01	TRUE	TRUE	CASWGSGSGLNTEAFF	TGTGCCAGCTGGGGGTCAGGGAGCGGCCTGAACACTGAAGCTTTCTTT	21199	7	clonotype1213	clonotype1213_consensus_2	single TCR
GAAGCAGTCTTGTCAT-1	TRUE	GAAGCAGTCTTGTCAT-1_contig_3	TRUE	431	TRA	TRAV35*01	None	TRAJ42*01	TRAC*01	TRUE	TRUE	CAGIPYGGSQGNLIF	TGTGCTGGTATTCCCTATGGAGGAAGCCAAGGAAATCTCATCTTT	4612	1	clonotype1213	clonotype1213_consensus_1	single TCR
GAATAAGAGCTGTTCA-1	TRUE	GAATAAGAGCTGTTCA-1_contig_1	TRUE	512	TRA	TRAV24*01	None	TRAJ53*01	TRAC*01	TRUE	TRUE	CASSGGSNYKLTF	TGTGCCTCCTCCGGAGGTAGCAACTATAAACTGACATTT	212	1	clonotype1214	clonotype1214_consensus_2	single TCR
GAATAAGAGCTGTTCA-1	TRUE	GAATAAGAGCTGTTCA-1_contig_2	TRUE	508	TRB	TRBV7-2*01	TRBD1*01	TRBJ1-2*01	TRBC1*01	TRUE	TRUE	CASSSHRTGPNYGYTF	TGTGCCAGCAGCTCACACCGGACAGGGCCCAACTATGGCTACACCTTC	3849	1	clonotype1214	clonotype1214_consensus_1	single TCR
GAATAAGGTTCCAACA-1	TRUE	GAATAAGGTTCCAACA-1_contig_1	TRUE	946	TRB	TRBV11-2*01	TRBD2*02	TRBJ1-5*01	TRBC1*01	TRUE	TRUE	CASSLAGGFNQPQHF	TGTGCCAGCAGCTTAGCGGGAGGATTCAATCAGCCCCAGCATTTT	8908	3	clonotype1216	clonotype1216_consensus_2	single TCR
GAATAAGGTTCCAACA-1	TRUE	GAATAAGGTTCCAACA-1_contig_3	TRUE	501	TRA	TRAV38-2/DV8*01	None	TRAJ44*01	TRAC*01	TRUE	TRUE	CAYRITGTASKLTF	TGTGCTTATAGGATCACCGGCACTGCCAGTAAACTCACCTTT	8180	2	clonotype1216	clonotype1216_consensus_1	single TCR
GAATGAAAGACGCTTT-1	TRUE	GAATGAAAGACGCTTT-1_contig_1	TRUE	650	TRA	TRAV12-1*01	None	TRAJ37*01	TRAC*01	TRUE	TRUE	CVVRSYNTGKLIF	TGTGTGGTGAGGTCTTACAACACAGGCAAACTAATCTTT	3414	1	clonotype1217	clonotype1217_consensus_2	single TCR
GAATGAAAGACGCTTT-1	TRUE	GAATGAAAGACGCTTT-1_contig_2	TRUE	678	TRB	TRBV14*01	None	TRBJ1-1*01	TRBC1*01	TRUE	TRUE	CASSPVRNTEAFF	TGTGCCAGCAGCCCCGTTCGGAACACTGAAGCTTTCTTT	9608	3	clonotype1217	clonotype1217_consensus_1	single TCR
GAATGAACATACCATG-1	TRUE	GAATGAACATACCATG-1_contig_1	TRUE	697	TRB	TRBV12-5*01	TRBD2*01	TRBJ2-3*01	TRBC2*01	TRUE	TRUE	CASDGGLALDTQYF	TGTGCTAGTGACGGCGGACTAGCACTAGATACGCAGTATTTT	16989	5	clonotype1218	clonotype1218_consensus_2	single TCR
GAATGAACATACCATG-1	TRUE	GAATGAACATACCATG-1_contig_3	TRUE	475	TRA	TRAV9-2*01	None	TRAJ53*01	TRAC*01	TRUE	TRUE	CALRAGSGGSNYKLTF	TGTGCTCTGAGGGCGGGTAGTGGAGGTAGCAACTATAAACTGACATTT	3795	1	clonotype1218	clonotype1218_consensus_1	single TCR
GAATGAAGTCCGAATT-1	TRUE	GAATGAAGTCCGAATT-1_contig_1	TRUE	699	TRB	TRBV7-6*01	TRBD2*01	TRBJ2-5*01	TRBC2*01	TRUE	TRUE	CASSLALGTSGGVWETQYF	TGTGCCAGCAGCCTGGCCCTCGGGACTAGCGGGGGAGTGTGGGAGACCCAGTACTTC	16016	4	clonotype1220	clonotype1220_consensus_2	single TCR
GAATGAAGTCCGAATT-1	TRUE	GAATGAAGTCCGAATT-1_contig_2	TRUE	496	TRA	TRAV10*01	None	TRAJ12*01	TRAC*01	TRUE	TRUE	CVVMAWGDSSYKLIF	TGTGTGGTGATGGCCTGGGGGGATAGCAGCTATAAATTGATCTTC	9005	2	clonotype1220	clonotype1220_consensus_1	single TCR
GAATGAATCAGTCCCT-1	TRUE	GAATGAATCAGTCCCT-1_contig_1	TRUE	718	TRB	TRBV6-1*01	TRBD1*01	TRBJ2-7*01	TRBC2*01	TRUE	TRUE	CASIAPQGYYEQYF	TGTGCCAGCATCGCACCACAGGGGTACTACGAGCAGTACTTC	10528	3	clonotype1221	clonotype1221_consensus_2	single TCR
GAATGAATCAGTCCCT-1	TRUE	GAATGAATCAGTCCCT-1_contig_3	TRUE	500	TRA	TRAV13-1*01	None	TRAJ16*01	TRAC*01	TRUE	TRUE	CAAMKYRF	TGTGCAGCAATGAAGTATAGGTTT	3969	1	clonotype1221	clonotype1221_consensus_1	single TCR
GAATGAATCTCGATGA-1	TRUE	GAATGAATCTCGATGA-1_contig_1	TRUE	699	TRB	TRBV6-5*01	TRBD1*01	TRBJ2-7*01	TRBC2*01	TRUE	TRUE	CASSSTPGHGYEQYF	TGTGCCAGCAGTTCAACGCCGGGACATGGCTACGAGCAGTACTTC	26426	9	clonotype1222	clonotype1222_consensus_2	single TCR
GAATGAATCTCGATGA-1	TRUE	GAATGAATCTCGATGA-1_contig_2	TRUE	589	TRA	TRAV14/DV4*01	None	TRAJ57*01	TRAC*01	TRUE	TRUE	CAMRDQGGSEKLVF	TGTGCAATGAGAGATCAGGGCGGATCTGAAAAGCTGGTCTTT	4011	2	clonotype1222	clonotype1222_consensus_1	single TCR
GACACGCAGTGGTCCC-1	TRUE	GACACGCAGTGGTCCC-1_contig_1	TRUE	678	TRB	TRBV5-1*01	TRBD2*01	TRBJ2-5*01	TRBC2*01	TRUE	TRUE	CASAYSGGQETQYF	TGCGCCAGCGCCTATAGCGGGGGACAAGAGACCCAGTACTTC	28229	8	clonotype1223	clonotype1223_consensus_2	single TCR
GACACGCAGTGGTCCC-1	TRUE	GACACGCAGTGGTCCC-1_contig_4	TRUE	503	TRA	TRAV21*01	None	TRAJ57*01	TRAC*01	TRUE	TRUE	CAVQGGSEKLVF	TGTGCTGTGCAGGGCGGATCTGAAAAGCTGGTCTTT	4662	1	clonotype1223	clonotype1223_consensus_1	single TCR
GACACGCGTCTAGTCA-1	TRUE	GACACGCGTCTAGTCA-1_contig_1	TRUE	463	TRA	TRAV2*01	None	TRAJ22*01	TRAC*01	TRUE	TRUE	CAVEDPAASGSARQLTF	TGTGCTGTGGAGGATCCCGCTGCTTCTGGTTCTGCAAGGCAACTGACCTTT	4798	1	clonotype1226	clonotype1226_consensus_1	single TCR
GACACGCGTCTAGTCA-1	TRUE	GACACGCGTCTAGTCA-1_contig_2	TRUE	696	TRB	TRBV2*01	TRBD2*01	TRBJ2-7*01	TRBC2*01	TRUE	TRUE	CASSDKAGVEQYF	TGTGCCAGCAGTGACAAAGCCGGGGTGGAGCAGTACTTC	6326	4	clonotype1226	clonotype1226_consensus_2	single TCR
GACACGCGTTTGCATG-1	TRUE	GACACGCGTTTGCATG-1_contig_1	TRUE	558	TRA	TRAV5*01	None	TRAJ49*01	TRAC*01	TRUE	TRUE	CAESIEYTGNQFYF	TGTGCAGAGAGTATAGAGTATACCGGTAACCAGTTCTATTTT	6247	2	clonotype1228	clonotype1228_consensus_1	single TCR
GACACGCGTTTGCATG-1	TRUE	GACACGCGTTTGCATG-1_contig_2	TRUE	541	TRB	TRBV11-2*03	TRBD2*02	TRBJ1-6*02	TRBC1*01	TRUE	TRUE	CASSLGWGAPEPSPLHF	TGTGCCAGCAGCTTAGGTTGGGGAGCACCAGAGCCCTCACCCCTCCACTTT	3054	1	clonotype1228	clonotype1228_consensus_2	single TCR
GACAGAGCATCTCCCA-1	TRUE	GACAGAGCATCTCCCA-1_contig_1	TRUE	712	TRB	TRBV6-2*01	None	TRBJ1-1*01	TRBC1*01	TRUE	TRUE	CASSPQSGEAFF	TGTGCCAGCAGTCCTCAGTCGGGTGAAGCTTTCTTT	14845	6	clonotype1230	clonotype1230_consensus_2	single TCR
GACAGAGCATCTCCCA-1	TRUE	GACAGAGCATCTCCCA-1_contig_2	TRUE	556	TRA	TRAV1-2*01	None	TRAJ37*01	TRAC*01	TRUE	TRUE	CAVRGLGSGNTGKLIF	TGTGCTGTGAGAGGCCTTGGCTCTGGCAACACAGGCAAACTAATCTTT	4015	1	clonotype1230	clonotype1230_consensus_1	single TCR
GACAGAGTCAAACAAG-1	TRUE	GACAGAGTCAAACAAG-1_contig_1	TRUE	531	TRB	TRBV10-1*02	TRBD2*01	TRBJ1-1*01	TRBC1*01	TRUE	TRUE	CASSESQIGGETEAFF	TGCGCCAGCAGTGAGTCGCAAATCGGGGGTGAAACTGAAGCTTTCTTT	7901	3	clonotype1231	clonotype1231_consensus_2	single TCR
GACAGAGTCAAACAAG-1	TRUE	GACAGAGTCAAACAAG-1_contig_2	TRUE	510	TRA	TRAV29/DV5*01	None	TRAJ40*01	TRAC*01	TRUE	TRUE	CGTGGSGTYKYIF	TGTGGGACAGGTGGCTCAGGAACCTACAAATACATCTTT	3746	1	clonotype1231	clonotype1231_consensus_1	single TCR
GACAGAGTCTCATTCA-1	TRUE	GACAGAGTCTCATTCA-1_contig_1	TRUE	729	TRB	TRBV3-1*01	None	TRBJ2-7*01	TRBC2*01	TRUE	TRUE	CASSQDSHEQYF	TGTGCCAGCAGCCAAGATTCCCACGAGCAGTACTTC	21756	8	clonotype1232	clonotype1232_consensus_1	single TCR
GACAGAGTCTCATTCA-1	TRUE	GACAGAGTCTCATTCA-1_contig_2	TRUE	702	TRA	TRAV8-3*01	None	TRAJ31*01	TRAC*01	TRUE	TRUE	CAVGADNARLMF	TGTGCTGTGGGTGCAGACAATGCCAGACTCATGTTT	12612	5	clonotype1232	clonotype1232_consensus_2	single TCR
GACCAATAGACTAGAT-1	TRUE	GACCAATAGACTAGAT-1_contig_2	TRUE	553	TRB	TRBV6-6*02	None	TRBJ1-4*01	TRBC1*01	TRUE	TRUE	CASSYSIAATNEKLFF	TGTGCCAGCAGTTACTCGATAGCAGCAACTAATGAAAAACTGTTTTTT	3136	1	clonotype1233	clonotype1233_consensus_1	single TCR
GACCAATAGACTAGAT-1	TRUE	GACCAATAGACTAGAT-1_contig_4	TRUE	508	TRA	TRAV41*01	None	TRAJ33*01	TRAC*01	TRUE	TRUE	CAANPDSNYQLIW	TGTGCTGCCAATCCGGATAGCAACTATCAGTTAATCTGG	4207	1	clonotype1233	clonotype1233_consensus_2	single TCR
GACCAATGTAAGTGGC-1	TRUE	GACCAATGTAAGTGGC-1_contig_1	TRUE	518	TRB	TRBV7-9*01	None	TRBJ1-2*01	TRBC1*01	TRUE	TRUE	CASSLAQLGYTF	TGTGCCAGCAGCTTAGCGCAGTTGGGCTACACCTTC	10282	3	clonotype1234	clonotype1234_consensus_2	single TCR
GACCAATGTAAGTGGC-1	TRUE	GACCAATGTAAGTGGC-1_contig_2	TRUE	527	TRA	TRAV30*01	None	TRAJ45*01	TRAC*01	TRUE	TRUE	CGTEIRYSGGGADGLTF	TGTGGCACAGAGATCAGGTATTCAGGAGGAGGTGCTGACGGACTCACCTTT	10927	3	clonotype1234	clonotype1234_consensus_1	single TCR
GACCAATTCATGCAAC-1	TRUE	GACCAATTCATGCAAC-1_contig_1	TRUE	659	TRB	TRBV28*01	None	TRBJ1-2*01	TRBC1*01	TRUE	TRUE	CASSFHDALGGYTF	TGTGCCAGCAGTTTTCACGACGCCTTGGGGGGCTACACCTTC	5444	2	clonotype1235	clonotype1235_consensus_2	single TCR
GACCAATTCATGCAAC-1	TRUE	GACCAATTCATGCAAC-1_contig_4	TRUE	652	TRA	TRAV8-4*01	None	TRAJ15*01	TRAC*01	TRUE	TRUE	CAVRSGAGTALIF	TGTGCTGTGAGGTCCGGGGCAGGAACTGCTCTGATCTTT	2240	1	clonotype1235	clonotype1235_consensus_1	single TCR
GACCTGGCATGCCCGA-1	TRUE	GACCTGGCATGCCCGA-1_contig_1	TRUE	503	TRB	TRBV3-1*01	TRBD1*01	TRBJ1-2*01	TRBC1*01	TRUE	TRUE	CASSSTTGPYGYTF	TGTGCCAGCAGCTCCACGACAGGGCCCTATGGCTACACCTTC	3221	1	clonotype1236	clonotype1236_consensus_2	single TCR
GACCTGGCATGCCCGA-1	TRUE	GACCTGGCATGCCCGA-1_contig_2	TRUE	571	TRA	TRAV23/DV6*01	None	TRAJ23*01	TRAC*01	TRUE	TRUE	CAASKGQGGKLIF	TGTGCAGCAAGCAAGGGCCAGGGAGGAAAGCTTATCTTC	5282	2	clonotype1236	clonotype1236_consensus_1	single TCR
GACCTGGTCTACCAGA-1	TRUE	GACCTGGTCTACCAGA-1_contig_1	TRUE	789	TRB	TRBV23-1*01	None	TRBJ1-5*01	TRBC1*01	TRUE	TRUE	CISAPAVNLPWAQHF	TGTATCTCTGCGCCAGCAGTCAATCTTCCCTGGGCCCAGCATTTT	36126	11	clonotype1238	clonotype1238_consensus_2	single TCR
GACCTGGTCTACCAGA-1	TRUE	GACCTGGTCTACCAGA-1_contig_2	TRUE	520	TRA	TRAV21*01	None	TRAJ53*01	TRAC*01	TRUE	TRUE	CAVSEGSNYKLTF	TGTGCTGTGTCGGAAGGTAGCAACTATAAACTGACATTT	13476	4	clonotype1238	clonotype1238_consensus_1	single TCR
GACGCGTAGACATAAC-1	TRUE	GACGCGTAGACATAAC-1_contig_1	TRUE	513	TRA	TRAV13-1*01	None	TRAJ47*01	TRAC*01	TRUE	TRUE	CAASYMEYGNKLVF	TGTGCAGCAAGTTACATGGAATATGGAAACAAACTGGTCTTT	3706	1	clonotype1239	clonotype1239_consensus_1	single TCR
GACGCGTAGACATAAC-1	TRUE	GACGCGTAGACATAAC-1_contig_2	TRUE	673	TRB	TRBV20-1*02	TRBD2*01	TRBJ2-3*01	TRBC2*01	TRUE	TRUE	CSAIGTSGSDTQYF	TGCAGTGCTATCGGGACTAGCGGCTCAGATACGCAGTATTTT	7130	2	clonotype1239	clonotype1239_consensus_2	single TCR
GACGCGTAGCTACCTA-1	TRUE	GACGCGTAGCTACCTA-1_contig_1	TRUE	581	TRA	TRAV14/DV4*01	None	TRAJ12*01	TRAC*01	TRUE	TRUE	CASGGDSSYKLIF	TGTGCATCGGGAGGGGATAGCAGCTATAAATTGATCTTC	3929	1	clonotype1240	clonotype1240_consensus_1	single TCR
GACGCGTAGCTACCTA-1	TRUE	GACGCGTAGCTACCTA-1_contig_4	TRUE	690	TRB	TRBV12-4*01	TRBD2*01	TRBJ2-3*01	TRBC1*01	TRUE	TRUE	CASSLGSGGPTDTQYF	TGTGCCAGCAGTTTGGGTAGCGGGGGGCCCACAGATACGCAGTATTTT	2982	1	clonotype1240	clonotype1240_consensus_2	single TCR
GACGCGTCATTAGCCA-1	TRUE	GACGCGTCATTAGCCA-1_contig_1	TRUE	549	TRA	TRAV12-2*01	None	TRAJ49*01	TRAC*01	TRUE	TRUE	CAVNIDGNQFYF	TGTGCCGTGAACATCGACGGTAACCAGTTCTATTTT	11715	3	clonotype1243	clonotype1243_consensus_1	single TCR
GACGCGTCATTAGCCA-1	TRUE	GACGCGTCATTAGCCA-1_contig_2	TRUE	508	TRB	TRBV12-4*01	TRBD1*01	TRBJ2-5*01	TRBC2*01	TRUE	TRUE	CASSFATAKETQYF	TGTGCCAGCAGTTTTGCGACAGCGAAAGAGACCCAGTACTTC	5177	2	clonotype1243	clonotype1243_consensus_2	single TCR
GACGCGTTCACAAACC-1	TRUE	GACGCGTTCACAAACC-1_contig_1	TRUE	687	TRB	TRBV11-2*03	None	TRBJ2-3*01	TRBC2*01	TRUE	TRUE	CASSLTPPDTQYF	TGTGCCAGCAGCCTTACCCCCCCGGATACGCAGTATTTT	22621	8	clonotype1	clonotype1_consensus_1	single TCR
GACGCGTTCACAAACC-1	TRUE	GACGCGTTCACAAACC-1_contig_4	TRUE	658	TRA	TRAV8-2*01	None	TRAJ31*01	TRAC*01	TRUE	TRUE	CVVSFRNNNARLMF	TGTGTTGTGAGCTTTCGGAATAACAATGCCAGACTCATGTTT	3038	1	clonotype1	clonotype1_consensus_2	single TCR
GACGCGTTCCGCAGTG-1	TRUE	GACGCGTTCCGCAGTG-1_contig_1	TRUE	702	TRB	TRBV6-2*01	TRBD1*01	TRBJ1-6*02	TRBC1*01	TRUE	TRUE	CASSFDGKRTMERNNSPLHF	TGTGCCAGCAGTTTCGACGGCAAACGGACCATGGAGAGGAATAATTCACCCCTCCACTTT	19800	7	clonotype1245	clonotype1245_consensus_1	single TCR
GACGCGTTCCGCAGTG-1	TRUE	GACGCGTTCCGCAGTG-1_contig_3	TRUE	566	TRA	TRAV12-1*01	None	TRAJ12*01	TRAC*01	TRUE	TRUE	CVVNRGSYKLIF	TGTGTGGTGAACAGGGGCAGCTATAAATTGATCTTC	8902	2	clonotype1245	clonotype1245_consensus_2	single TCR
GACGGCTAGGCTCAGA-1	TRUE	GACGGCTAGGCTCAGA-1_contig_1	TRUE	564	TRA	TRAV1-1*01	None	TRAJ31*01	TRAC*01	TRUE	TRUE	CAVRNNNARLMF	TGCGCTGTGAGAAATAACAATGCCAGACTCATGTTT	17252	4	clonotype1249	clonotype1249_consensus_1	single TCR
GACGGCTAGGCTCAGA-1	TRUE	GACGGCTAGGCTCAGA-1_contig_2	TRUE	829	TRB	TRBV19*01	TRBD1*01	TRBJ2-2*01	TRBC2*01	TRUE	TRUE	CASSRPWTVDAGELFF	TGTGCCAGTAGTCGACCCTGGACAGTGGACGCGGGGGAGCTGTTTTTT	9671	5	clonotype1249	clonotype1249_consensus_2	single TCR
GACGGCTCACGCGAAA-1	TRUE	GACGGCTCACGCGAAA-1_contig_1	TRUE	697	TRA	TRAV26-1*01	None	TRAJ48*01	TRAC*01	TRUE	TRUE	CIVRVDFGNEKLTF	TGCATCGTCAGAGTCGACTTTGGAAATGAGAAATTAACCTTT	3084	2	clonotype1250	clonotype1250_consensus_1	single TCR
GACGGCTCACGCGAAA-1	TRUE	GACGGCTCACGCGAAA-1_contig_2	TRUE	709	TRB	TRBV7-9*03	TRBD2*02	TRBJ2-7*01	TRBC2*01	TRUE	TRUE	CASSIVAGLAGGKTYEQYF	TGTGCCAGCAGCATAGTTGCGGGACTAGCGGGAGGAAAAACCTACGAGCAGTACTTC	17845	6	clonotype1250	clonotype1250_consensus_2	single TCR
GACGGCTCATCTGGTA-1	TRUE	GACGGCTCATCTGGTA-1_contig_1	TRUE	537	TRA	TRAV13-1*01	None	TRAJ22*01	TRAC*01	TRUE	TRUE	CAASSGSARQLTF	TGTGCAGCCTCGTCTGGTTCTGCAAGGCAACTGACCTTT	6420	2	clonotype1252	clonotype1252_consensus_1	single TCR
GACGGCTCATCTGGTA-1	TRUE	GACGGCTCATCTGGTA-1_contig_5	TRUE	712	TRB	TRBV6-1*01	None	TRBJ2-5*01	TRBC1*01	TRUE	TRUE	CATTPKETQYF	TGTGCCACTACGCCAAAAGAGACCCAGTACTTC	2234	1	clonotype1252	clonotype1252_consensus_2	single TCR
GACGGCTGTAGCAAAT-1	TRUE	GACGGCTGTAGCAAAT-1_contig_1	TRUE	715	TRB	TRBV6-1*01	None	TRBJ2-7*01	TRBC2*01	TRUE	TRUE	CASSGGVYEQYF	TGTGCCAGCAGTGGAGGAGTCTACGAGCAGTACTTC	15791	7	clonotype1253	clonotype1253_consensus_2	single TCR
GACGGCTGTAGCAAAT-1	TRUE	GACGGCTGTAGCAAAT-1_contig_3	TRUE	579	TRA	TRAV29/DV5*01	None	TRAJ47*02	TRAC*01	TRUE	TRUE	CAASDTEYGNKLVF	TGTGCAGCAAGCGATACGGAATATGGAAACAAGCTGGTCTTT	10220	3	clonotype1253	clonotype1253_consensus_1	single TCR
GACGGCTTCTCGTTTA-1	TRUE	GACGGCTTCTCGTTTA-1_contig_1	TRUE	837	TRB	TRBV5-6*01	TRBD2*02	TRBJ2-3*01	TRBC2*01	TRUE	TRUE	CASSLVRRGTDTQYF	TGTGCCAGCAGCTTGGTAAGGAGGGGCACAGATACGCAGTATTTT	19029	6	clonotype1256	clonotype1256_consensus_2	single TCR
GACGGCTTCTCGTTTA-1	TRUE	GACGGCTTCTCGTTTA-1_contig_2	TRUE	501	TRA	TRAV17*01	None	TRAJ23*01	TRAC*01	TRUE	TRUE	CATGEGGKLIF	TGTGCTACGGGCGAAGGAGGAAAGCTTATCTTC	7685	2	clonotype1256	clonotype1256_consensus_1	single TCR
GACGGCTTCTTGAGAC-1	TRUE	GACGGCTTCTTGAGAC-1_contig_1	TRUE	723	TRB	TRBV6-5*01	None	TRBJ1-3*01	TRBC1*01	TRUE	TRUE	CASSYSSFKRNTIYF	TGTGCCAGCAGTTACTCGTCATTCAAAAGAAACACCATATATTTT	13528	6	clonotype1257	clonotype1257_consensus_2	single TCR
GACGGCTTCTTGAGAC-1	TRUE	GACGGCTTCTTGAGAC-1_contig_3	TRUE	551	TRA	TRAV26-1*01	None	TRAJ26*01	TRAC*01	TRUE	TRUE	CIVRVDNYGQNFVF	TGCATCGTCAGAGTCGACAACTATGGTCAGAATTTTGTCTTT	6664	3	clonotype1257	clonotype1257_consensus_1	single TCR
GACGTGCCAGACAAGC-1	TRUE	GACGTGCCAGACAAGC-1_contig_1	TRUE	494	TRA	TRAV38-2/DV8*01	None	TRAJ48*01	TRAC*01	TRUE	TRUE	CASRFGNEKLTF	TGTGCTTCCCGCTTTGGAAATGAGAAATTAACCTTT	4774	2	clonotype1258	clonotype1258_consensus_1	single TCR
GACGTGCCAGACAAGC-1	TRUE	GACGTGCCAGACAAGC-1_contig_3	TRUE	680	TRB	TRBV7-9*03	TRBD1*01	TRBJ1-4*01	TRBC1*01	TRUE	TRUE	CASSPETGDEKLFF	TGTGCCAGCAGCCCGGAGACAGGGGATGAAAAACTGTTTTTT	11188	3	clonotype1258	clonotype1258_consensus_2	single TCR
GACGTTACAGCTCGCA-1	TRUE	GACGTTACAGCTCGCA-1_contig_1	TRUE	504	TRB	TRBV2*01	TRBD2*02	TRBJ2-3*01	TRBC2*01	TRUE	TRUE	CASSLTSGRDTQYF	TGTGCCAGCAGTCTCACTAGCGGGAGGGATACGCAGTATTTT	6811	2	clonotype1262	clonotype1262_consensus_2	single TCR
GACGTTACAGCTCGCA-1	TRUE	GACGTTACAGCTCGCA-1_contig_2	TRUE	513	TRA	TRAV35*01	None	TRAJ49*01	TRAC*01	TRUE	TRUE	CAGQRSNTGNQFYF	TGTGCTGGGCAGAGATCGAACACCGGTAACCAGTTCTATTTT	324	1	clonotype1262	clonotype1262_consensus_1	single TCR
GACGTTACATCCGGGT-1	TRUE	GACGTTACATCCGGGT-1_contig_1	TRUE	678	TRB	TRBV5-1*01	TRBD1*01	TRBJ2-5*01	TRBC2*01	TRUE	TRUE	CASSSGGVLETQYF	TGCGCCAGCAGCTCGGGAGGGGTATTAGAGACCCAGTACTTC	24277	7	clonotype1264	clonotype1264_consensus_2	single TCR
GACGTTACATCCGGGT-1	TRUE	GACGTTACATCCGGGT-1_contig_2	TRUE	600	TRA	TRAV26-1*01	None	TRAJ26*01	TRAC*01	TRUE	TRUE	CIVRLVSYGQNFVF	TGCATCGTCAGACTCGTAAGCTATGGTCAGAATTTTGTCTTT	1785	1	clonotype1264	clonotype1264_consensus_1	single TCR
GACTAACCATGACGGA-1	TRUE	GACTAACCATGACGGA-1_contig_1	TRUE	539	TRA	TRAV26-1*01	None	TRAJ31*01	TRAC*01	TRUE	TRUE	CIVRVAGNNARLMF	TGCATCGTCAGAGTCGCTGGAAACAATGCCAGACTCATGTTT	3786	1	clonotype1267	clonotype1267_consensus_1	single TCR
GACTAACCATGACGGA-1	TRUE	GACTAACCATGACGGA-1_contig_2	TRUE	729	TRB	TRBV29-1*01	TRBD2*02	TRBJ2-1*01	TRBC2*01	TRUE	TRUE	CSGGLAGLVDEQFF	TGCAGCGGGGGACTAGCGGGACTTGTGGATGAGCAGTTCTTC	3407	2	clonotype1267	clonotype1267_consensus_2	single TCR
GACTAACCATTGGGCC-1	TRUE	GACTAACCATTGGGCC-1_contig_1	TRUE	676	TRB	TRBV28*01	TRBD1*01	TRBJ2-1*01	TRBC2*01	TRUE	TRUE	CASSSLGVSRGDNEQFF	TGTGCCAGCAGTTCCTTAGGGGTCTCCAGGGGGGACAATGAGCAGTTCTTC	9356	3	clonotype1268	clonotype1268_consensus_2	single TCR
GACTAACCATTGGGCC-1	TRUE	GACTAACCATTGGGCC-1_contig_3	TRUE	549	TRA	TRAV26-1*01	None	TRAJ29*01	TRAC*01	TRUE	TRUE	CIVRLPSGNTPLVF	TGCATCGTCAGGCTGCCTTCAGGAAACACACCTCTTGTCTTT	2802	1	clonotype1268	clonotype1268_consensus_1	single TCR
GACTAACGTCATTAGC-1	TRUE	GACTAACGTCATTAGC-1_contig_1	TRUE	562	TRA	TRAV16*01	None	TRAJ48*01	TRAC*01	TRUE	TRUE	CALRIWFGNEKLTF	TGTGCTCTAAGAATTTGGTTTGGAAATGAGAAATTAACCTTT	7097	2	clonotype1269	clonotype1269_consensus_2	single TCR
GACTAACGTCATTAGC-1	TRUE	GACTAACGTCATTAGC-1_contig_2	TRUE	675	TRB	TRBV20-1*02	TRBD1*01	TRBJ1-5*01	TRBC1*01	TRUE	TRUE	CSATTGRNQPQHF	TGCAGTGCCACTACAGGTAGAAATCAGCCCCAGCATTTT	18322	8	clonotype1269	clonotype1269_consensus_1	single TCR
GACTGCGCAAGGGTCA-1	TRUE	GACTGCGCAAGGGTCA-1_contig_1	TRUE	663	TRB	TRBV19*01	None	TRBJ2-5*01	TRBC2*01	TRUE	TRUE	CASSMGKETQYF	TGTGCCAGTAGTATGGGAAAAGAGACCCAGTACTTC	10972	6	clonotype1273	clonotype1273_consensus_2	single TCR
GACTGCGCAAGGGTCA-1	TRUE	GACTGCGCAAGGGTCA-1_contig_2	TRUE	581	TRA	TRAV8-1*01	None	TRAJ40*01	TRAC*01	TRUE	TRUE	CAVNFGTGTYKYIF	TGTGCCGTGAATTTTGGTACAGGAACCTACAAATACATCTTT	3939	1	clonotype1273	clonotype1273_consensus_1	single TCR
GACTGCGCACTCAGGC-1	TRUE	GACTGCGCACTCAGGC-1_contig_1	TRUE	496	TRA	TRAV1-1*01	None	TRAJ8*01	TRAC*01	TRUE	TRUE	CAVRGGFQKLVF	TGCGCTGTGAGAGGGGGCTTTCAGAAACTTGTATTT	7609	2	clonotype1274	clonotype1274_consensus_1	single TCR
GACTGCGCACTCAGGC-1	TRUE	GACTGCGCACTCAGGC-1_contig_2	TRUE	663	TRB	TRBV6-1*01	TRBD1*01	TRBJ1-5*01	TRBC1*01	TRUE	TRUE	CASREGQGVHQPQHF	TGTGCCAGCAGAGAGGGACAGGGTGTCCATCAGCCCCAGCATTTT	4217	1	clonotype1274	clonotype1274_consensus_2	single TCR
GACTGCGCATTAGGCT-1	TRUE	GACTGCGCATTAGGCT-1_contig_1	TRUE	665	TRB	TRBV4-1*01	TRBD1*01	TRBJ1-2*01	TRBC1*01	TRUE	TRUE	CASSQSPRADLYGYTF	TGCGCCAGCAGCCAAAGCCCCAGGGCCGATCTCTATGGCTACACCTTC	9782	3	clonotype1275	clonotype1275_consensus_2	single TCR
GACTGCGCATTAGGCT-1	TRUE	GACTGCGCATTAGGCT-1_contig_3	TRUE	489	TRA	TRAV29/DV5*01	None	TRAJ49*01	TRAC*01	TRUE	TRUE	CAASATGNQFYF	TGTGCAGCAAGCGCCACCGGTAACCAGTTCTATTTT	3918	1	clonotype1275	clonotype1275_consensus_1	single TCR
GAGGTGAAGCTAGGCA-1	TRUE	GAGGTGAAGCTAGGCA-1_contig_1	TRUE	744	TRB	TRBV4-2*01	TRBD2*01	TRBJ2-1*01	TRBC2*01	TRUE	TRUE	CASSRIAGGHNEQFF	TGTGCCAGCAGCCGGATAGCGGGGGGACACAATGAGCAGTTCTTC	20909	7	clonotype1281	clonotype1281_consensus_1	single TCR
GAGGTGAAGCTAGGCA-1	TRUE	GAGGTGAAGCTAGGCA-1_contig_2	TRUE	677	TRA	TRAV8-3*01	None	TRAJ34*01	TRAC*01	TRUE	TRUE	CAVARDTDKLIF	TGTGCTGTGGCCAGGGACACCGACAAGCTCATCTTT	3261	1	clonotype1281	clonotype1281_consensus_2	single TCR
GAGGTGACACATTTCT-1	TRUE	GAGGTGACACATTTCT-1_contig_1	TRUE	885	TRB	TRBV5-4*01	TRBD2*01	TRBJ2-1*01	TRBC2*01	TRUE	TRUE	CASRLAGGSYNEQFF	TGTGCCAGTCGTCTAGCGGGGGGCTCCTACAATGAGCAGTTCTTC	2174	1	clonotype1282	clonotype1282_consensus_2	single TCR
GAGGTGACACATTTCT-1	TRUE	GAGGTGACACATTTCT-1_contig_2	TRUE	597	TRA	TRAV17*01	None	TRAJ53*01	TRAC*01	TRUE	TRUE	CATVNSGGSNYKLTF	TGTGCTACGGTCAATAGTGGAGGTAGCAACTATAAACTGACATTT	2793	1	clonotype1282	clonotype1282_consensus_1	single TCR
GAGGTGACACCCATTC-1	TRUE	GAGGTGACACCCATTC-1_contig_2	TRUE	762	TRB	TRBV30*01	None	TRBJ2-3*01	TRBC2*01	TRUE	TRUE	CAWGRYGDTQYF	TGTGCCTGGGGCCGTTATGGGGATACGCAGTATTTT	2983	1	clonotype1283	clonotype1283_consensus_2	single TCR
GAGGTGACACCCATTC-1	TRUE	GAGGTGACACCCATTC-1_contig_3	TRUE	442	TRA	TRAV12-2*01	None	TRAJ41*01	TRAC*01	TRUE	TRUE	CAVNSNSGYALNF	TGTGCCGTGAACTCAAATTCCGGGTATGCACTCAACTTC	5699	1	clonotype1283	clonotype1283_consensus_1	single TCR
GAGGTGACATGCAACT-1	TRUE	GAGGTGACATGCAACT-1_contig_1	TRUE	521	TRA	TRAV24*01	None	TRAJ57*01	TRAC*01	TRUE	TRUE	CAPTRSEKLVF	TGTGCCCCGACCCGATCTGAAAAGCTGGTCTTT	3778	1	clonotype1284	clonotype1284_consensus_2	single TCR
GAGGTGACATGCAACT-1	TRUE	GAGGTGACATGCAACT-1_contig_3	TRUE	705	TRB	TRBV20-1*02	TRBD2*02	TRBJ1-2*01	TRBC1*01	TRUE	TRUE	CSAPRGLGGAYGYTF	TGCAGTGCCCCCCGGGGGCTGGGAGGGGCCTATGGCTACACCTTC	11563	5	clonotype1284	clonotype1284_consensus_1	single TCR
GAGGTGAGTAGGGTAC-1	TRUE	GAGGTGAGTAGGGTAC-1_contig_1	TRUE	700	TRB	TRBV20-1*02	TRBD2*01	TRBJ2-1*01	TRBC2*01	TRUE	TRUE	CSARLAGLNEQFF	TGCAGTGCAAGACTAGCGGGTCTCAATGAGCAGTTCTTC	16122	5	clonotype1285	clonotype1285_consensus_1	single TCR
GAGGTGAGTAGGGTAC-1	TRUE	GAGGTGAGTAGGGTAC-1_contig_2	TRUE	480	TRA	TRAV38-1*01	None	TRAJ52*01	TRAC*01	TRUE	TRUE	CAFGGRGTSYGKLTF	TGTGCTTTCGGGGGTCGTGGTACTAGCTATGGAAAGCTGACATTT	4167	1	clonotype1285	clonotype1285_consensus_2	single TCR
GAGTCCGCACACCGAC-1	TRUE	GAGTCCGCACACCGAC-1_contig_1	TRUE	600	TRB	TRBV10-2*01	TRBD1*01	TRBJ2-5*01	TRBC2*01	TRUE	TRUE	CASRGWTGQETQYF	TGCGCCAGCAGGGGATGGACAGGACAAGAGACCCAGTACTTC	13373	4	clonotype1292	clonotype1292_consensus_2	single TCR
GAGTCCGCACACCGAC-1	TRUE	GAGTCCGCACACCGAC-1_contig_2	TRUE	689	TRA	TRAV8-3*01	None	TRAJ34*01	TRAC*01	TRUE	TRUE	CAVGAVTKYTDKLIF	TGTGCTGTGGGTGCGGTTACTAAGTACACCGACAAGCTCATCTTT	6759	3	clonotype1292	clonotype1292_consensus_1	single TCR
GAGTCCGCATTACCTT-1	TRUE	GAGTCCGCATTACCTT-1_contig_1	TRUE	521	TRB	TRBV20-1*02	TRBD1*01	TRBJ2-2*01	TRBC2*01	TRUE	TRUE	CSARDPLNTGELFF	TGCAGTGCTAGGGACCCTTTGAACACCGGGGAGCTGTTTTTT	10639	3	clonotype1295	clonotype1295_consensus_1	single TCR
GAGTCCGCATTACCTT-1	TRUE	GAGTCCGCATTACCTT-1_contig_3	TRUE	694	TRA	TRAV26-1*01	None	TRAJ47*01	TRAC*01	TRUE	TRUE	CIVRVVGGNKLVF	TGCATCGTCAGAGTCGTAGGAGGAAACAAACTGGTCTTT	3875	1	clonotype1295	clonotype1295_consensus_2	single TCR
GAGTCCGCATTGTGCA-1	TRUE	GAGTCCGCATTGTGCA-1_contig_1	TRUE	702	TRB	TRBV11-2*03	TRBD2*01	TRBJ2-2*01	TRBC2*01	TRUE	TRUE	CASSSGLRVAGLDGELFF	TGTGCCAGCAGCTCGGGACTCCGGGTAGCGGGGTTAGACGGGGAGCTGTTTTTT	34377	10	clonotype1296	clonotype1296_consensus_2	single TCR
GAGTCCGCATTGTGCA-1	TRUE	GAGTCCGCATTGTGCA-1_contig_3	TRUE	641	TRA	TRAV8-4*01	None	TRAJ49*01	TRAC*01	TRUE	TRUE	CAVITNTGNQFYF	TGTGCTGTGATAACGAACACCGGTAACCAGTTCTATTTT	3234	1	clonotype1296	clonotype1296_consensus_1	single TCR
GAGTCCGCATTTCACT-1	TRUE	GAGTCCGCATTTCACT-1_contig_1	TRUE	671	TRB	TRBV9*02	None	TRBJ2-2*01	TRBC2*01	TRUE	TRUE	CASSVVDTGELFF	TGTGCCAGCAGCGTAGTAGACACCGGGGAGCTGTTTTTT	12631	5	clonotype1297	clonotype1297_consensus_1	single TCR
GAGTCCGCATTTCACT-1	TRUE	GAGTCCGCATTTCACT-1_contig_2	TRUE	654	TRA	TRAV8-4*01	None	TRAJ11*01	TRAC*01	TRUE	TRUE	CAVSQLSGYSTLTF	TGTGCTGTGAGTCAATTATCAGGATACAGCACCCTCACCTTT	10221	3	clonotype1297	clonotype1297_consensus_2	single TCR
GAGTCCGGTAGCTCCG-1	TRUE	GAGTCCGGTAGCTCCG-1_contig_1	TRUE	926	TRB	TRBV9*02	TRBD1*01	TRBJ2-5*01	TRBC2*01	TRUE	TRUE	CASSVRGGRETQYF	TGTGCCAGCAGCGTAAGAGGGGGCCGGGAGACCCAGTACTTC	15638	5	clonotype1298	clonotype1298_consensus_1	single TCR
GAGTCCGGTAGCTCCG-1	TRUE	GAGTCCGGTAGCTCCG-1_contig_3	TRUE	450	TRA	TRAV30*01	None	TRAJ43*01	TRAC*01	TRUE	TRUE	CGTERDMRF	TGTGGCACAGAGCGGGACATGCGCTTT	4413	1	clonotype1298	clonotype1298_consensus_2	single TCR
GATCAGTCAGCTGTAT-1	TRUE	GATCAGTCAGCTGTAT-1_contig_1	TRUE	557	TRB	TRBV6-5*01	TRBD1*01	TRBJ1-3*01	TRBC1*01	TRUE	TRUE	CASSRHLTGITGNTIYF	TGTGCCAGCAGCCGACACCTCACAGGGATCACTGGAAACACCATATATTTT	13764	5	clonotype1302	clonotype1302_consensus_2	single TCR
GATCAGTCAGCTGTAT-1	TRUE	GATCAGTCAGCTGTAT-1_contig_2	TRUE	490	TRA	TRAV9-2*01	None	TRAJ20*01	TRAC*01	TRUE	TRUE	CALRSDYKLSF	TGTGCTCTGAGGTCCGACTACAAGCTCAGCTTT	9891	3	clonotype1302	clonotype1302_consensus_1	single TCR
GATCGATCATCACAAC-1	TRUE	GATCGATCATCACAAC-1_contig_1	TRUE	697	TRB	TRBV12-4*01	TRBD1*01	TRBJ1-2*01	TRBC1*01	TRUE	TRUE	CASSFITMQGRYGYTF	TGTGCCAGCAGTTTCATAACGATGCAGGGGAGATATGGCTACACCTTC	2930	1	clonotype1308	clonotype1308_consensus_1	single TCR
GATCGATCATCACAAC-1	TRUE	GATCGATCATCACAAC-1_contig_2	TRUE	570	TRA	TRAV19*01	None	TRAJ54*01	TRAC*01	TRUE	TRUE	CALSEITWGAQKLVF	TGTGCTCTGAGTGAGATTACATGGGGAGCCCAGAAGCTGGTATTT	3089	1	clonotype1308	clonotype1308_consensus_2	single TCR
GATCGATGTTAAGATG-1	TRUE	GATCGATGTTAAGATG-1_contig_1	TRUE	704	TRB	TRBV7-2*01	TRBD2*02	TRBJ2-7*01	TRBC2*01	TRUE	TRUE	CASSLDPGSYEQYF	TGTGCCAGCAGCTTAGATCCGGGATCCTACGAGCAGTACTTC	22037	7	clonotype1309	clonotype1309_consensus_1	single TCR
GATCGATGTTAAGATG-1	TRUE	GATCGATGTTAAGATG-1_contig_2	TRUE	555	TRA	TRAV12-1*01	None	TRAJ15*01	TRAC*01	TRUE	TRUE	CVVNMWAGTALIF	TGTGTGGTGAACATGTGGGCAGGAACTGCTCTGATCTTT	3579	1	clonotype1309	clonotype1309_consensus_2	single TCR
GATCGCGCACCTCGTT-1	TRUE	GATCGCGCACCTCGTT-1_contig_1	TRUE	689	TRB	TRBV12-4*01	TRBD2*02	TRBJ1-6*01	TRBC1*01	TRUE	TRUE	CASRGKDGYNSPLHF	TGTGCCAGCAGGGGGAAGGACGGTTATAATTCACCCCTCCACTTT	14053	5	clonotype1312	clonotype1312_consensus_1	single TCR
GATCGCGCACCTCGTT-1	TRUE	GATCGCGCACCTCGTT-1_contig_4	TRUE	580	TRA	TRAV23/DV6*01	None	TRAJ32*02	TRAC*01	TRUE	TRUE	CAASGGGGATNKLIF	TGTGCAGCCTCGGGGGGTGGTGGTGCTACAAACAAGCTCATCTTT	4757	2	clonotype1312	clonotype1312_consensus_2	single TCR
GATCGCGGTAGGGACT-1	TRUE	GATCGCGGTAGGGACT-1_contig_1	TRUE	661	TRB	TRBV5-1*01	TRBD1*01	TRBJ2-5*01	TRBC2*01	TRUE	TRUE	CASSFTGNPTETQYF	TGCGCCAGCAGCTTTACAGGGAACCCCACTGAGACCCAGTACTTC	8713	6	clonotype1313	clonotype1313_consensus_2	single TCR
GATCGCGGTAGGGACT-1	TRUE	GATCGCGGTAGGGACT-1_contig_3	TRUE	493	TRA	TRAV24*01	None	TRAJ52*01	TRAC*01	TRUE	TRUE	CASPPNAGGTSYGKLTF	TGTGCCTCTCCCCCGAATGCTGGTGGTACTAGCTATGGAAAGCTGACATTT	4351	3	clonotype1313	clonotype1313_consensus_1	single TCR
GATCGCGGTGTGCCTG-1	TRUE	GATCGCGGTGTGCCTG-1_contig_1	TRUE	730	TRB	TRBV3-1*01	TRBD1*01	TRBJ2-7*01	TRBC2*01	TRUE	TRUE	CASSQGLQAETSYEQYF	TGTGCCAGCAGCCAAGGTCTACAGGCCGAAACCTCCTACGAGCAGTACTTC	4051	2	clonotype1314	clonotype1314_consensus_1	single TCR
GATCGCGGTGTGCCTG-1	TRUE	GATCGCGGTGTGCCTG-1_contig_2	TRUE	543	TRA	TRAV1-2*01	None	TRAJ21*01	TRAC*01	TRUE	TRUE	CAVLYNFNKFYF	TGTGCTGTCCTATACAACTTCAACAAATTTTACTTT	2919	1	clonotype1314	clonotype1314_consensus_2	single TCR
GATCGCGTCAAGATCC-1	TRUE	GATCGCGTCAAGATCC-1_contig_1	TRUE	498	TRA	TRAV4*01	None	TRAJ32*01	TRAC*01	TRUE	TRUE	CLVGAFNYGGATNKLIF	TGCCTCGTGGGTGCATTCAATTATGGTGGTGCTACAAACAAGCTCATCTTT	7133	2	clonotype1315	clonotype1315_consensus_1	single TCR
GATCGCGTCAAGATCC-1	TRUE	GATCGCGTCAAGATCC-1_contig_2	TRUE	681	TRB	TRBV27*01	TRBD2*02	TRBJ2-1*01	TRBC2*01	TRUE	TRUE	CATLGRGIYNEQFF	TGTGCCACCCTCGGGAGGGGGATCTACAATGAGCAGTTCTTC	12080	5	clonotype1315	clonotype1315_consensus_2	single TCR
GATCGTAAGCAACGGT-1	TRUE	GATCGTAAGCAACGGT-1_contig_1	TRUE	523	TRA	TRAV17*01	None	TRAJ6*01	TRAC*01	TRUE	TRUE	CATVASGGSYIPTF	TGTGCTACGGTCGCATCAGGAGGAAGCTACATACCTACATTT	4529	1	clonotype1317	clonotype1317_consensus_2	single TCR
GATCGTAAGCAACGGT-1	TRUE	GATCGTAAGCAACGGT-1_contig_3	TRUE	710	TRB	TRBV6-1*01	TRBD1*01	TRBJ1-5*01	TRBC1*01	TRUE	TRUE	CASRQGTGNQPQHF	TGTGCCAGCAGACAGGGGACGGGCAATCAGCCCCAGCATTTT	3516	1	clonotype1317	clonotype1317_consensus_1	single TCR
GATCGTACACCTGGTG-1	TRUE	GATCGTACACCTGGTG-1_contig_1	TRUE	571	TRA	TRAV29/DV5*01	None	TRAJ41*01	TRAC*01	TRUE	TRUE	CAASTSGYALNF	TGTGCAGCAAGCACTTCCGGGTATGCACTCAACTTC	1896	1	clonotype1318	clonotype1318_consensus_1	single TCR
GATCGTACACCTGGTG-1	TRUE	GATCGTACACCTGGTG-1_contig_2	TRUE	522	TRB	TRBV7-9*03	TRBD1*01	TRBJ2-3*01	TRBC2*01	TRUE	TRUE	CASSPRDRGPAGDIADTQYF	TGTGCCAGCAGCCCAAGGGACAGGGGGCCAGCGGGAGATATCGCAGATACGCAGTATTTT	6334	2	clonotype1318	clonotype1318_consensus_2	single TCR
GATCGTACATCACGTA-1	TRUE	GATCGTACATCACGTA-1_contig_1	TRUE	476	TRA	TRAV9-2*01	None	TRAJ49*01	TRAC*01	TRUE	TRUE	CALSPNTGNQFYF	TGTGCTCTGAGCCCTAACACCGGTAACCAGTTCTATTTT	4954	2	clonotype1319	clonotype1319_consensus_1	single TCR
GATCGTACATCACGTA-1	TRUE	GATCGTACATCACGTA-1_contig_2	TRUE	721	TRB	TRBV7-7*01	None	TRBJ2-2*01	TRBC2*01	TRUE	TRUE	CASSLGTGELFF	TGTGCTAGCAGCTTAGGCACCGGGGAGCTGTTTTTT	14461	5	clonotype1319	clonotype1319_consensus_2	single TCR
GATCGTATCGCAAGCC-1	TRUE	GATCGTATCGCAAGCC-1_contig_1	TRUE	694	TRB	TRBV15*01	None	TRBJ2-1*01	TRBC1*01	TRUE	TRUE	CATSGPPGAIIYNEQFF	TGTGCCACCAGCGGACCCCCTGGAGCGATAATATACAATGAGCAGTTCTTC	12573	4	clonotype1322	clonotype1322_consensus_1	single TCR
GATCGTATCGCAAGCC-1	TRUE	GATCGTATCGCAAGCC-1_contig_3	TRUE	673	TRA	TRAV3*01	None	TRAJ26*01	TRAC*01	TRUE	TRUE	CAVRPPDNYGQNFVF	TGTGCTGTGAGACCCCCGGATAACTATGGTCAGAATTTTGTCTTT	2256	1	clonotype1322	clonotype1322_consensus_2	single TCR
GATCTAGAGCTTATCG-1	TRUE	GATCTAGAGCTTATCG-1_contig_1	TRUE	527	TRA	TRAV13-1*01	None	TRAJ52*01	TRAC*01	TRUE	TRUE	CAAVEGTSYGKLTF	TGTGCAGCGGTTGAGGGTACTAGCTATGGAAAGCTGACATTT	4253	1	clonotype1324	clonotype1324_consensus_1	single TCR
GATCTAGAGCTTATCG-1	TRUE	GATCTAGAGCTTATCG-1_contig_2	TRUE	711	TRB	TRBV20-1*02	TRBD1*01	TRBJ1-1*01	TRBC1*01	TRUE	TRUE	CSARAPLGQDMNTEAFF	TGCAGTGCTAGGGCCCCACTGGGACAGGATATGAACACTGAAGCTTTCTTT	13236	4	clonotype1324	clonotype1324_consensus_2	single TCR
GATCTAGGTCCGCTGA-1	TRUE	GATCTAGGTCCGCTGA-1_contig_1	TRUE	531	TRB	TRBV12-4*01	TRBD2*01	TRBJ2-1*01	TRBC2*01	TRUE	TRUE	CASSSDESLYNEQFF	TGTGCCAGCAGTTCAGACGAGTCCCTTTACAATGAGCAGTTCTTC	9977	3	clonotype1325	clonotype1325_consensus_1	single TCR
GATCTAGGTCCGCTGA-1	TRUE	GATCTAGGTCCGCTGA-1_contig_2	TRUE	548	TRA	TRAV12-2*01	None	TRAJ6*01	TRAC*01	TRUE	TRUE	CAVREGGSYIPTF	TGTGCCGTGAGAGAAGGAGGAAGCTACATACCTACATTT	3610	1	clonotype1325	clonotype1325_consensus_2	single TCR
GATCTAGTCCGCGTTT-1	TRUE	GATCTAGTCCGCGTTT-1_contig_1	TRUE	540	TRB	TRBV3-1*01	TRBD2*01	TRBJ2-1*01	TRBC2*01	TRUE	TRUE	CASSELIRGASNEQFF	TGTGCCAGCAGCGAATTGATCCGGGGGGCTTCCAATGAGCAGTTCTTC	7962	3	clonotype1326	clonotype1326_consensus_2	single TCR
GATCTAGTCCGCGTTT-1	TRUE	GATCTAGTCCGCGTTT-1_contig_3	TRUE	503	TRA	TRAV13-2*01	None	TRAJ52*01	TRAC*01	TRUE	TRUE	CAENIAGGTSYGKLTF	TGTGCAGAGAATATAGCTGGTGGTACTAGCTATGGAAAGCTGACATTT	4295	1	clonotype1326	clonotype1326_consensus_1	single TCR
GATCTAGTCTACCTGC-1	TRUE	GATCTAGTCTACCTGC-1_contig_1	TRUE	726	TRB	TRBV6-1*01	TRBD2*01	TRBJ2-4*01	TRBC2*01	TRUE	TRUE	CASSTTYSGTLAKNIQYF	TGTGCCAGCAGTACAACCTATAGCGGAACATTAGCCAAAAACATTCAGTACTTC	13355	4	clonotype1328	clonotype1328_consensus_2	single TCR
GATCTAGTCTACCTGC-1	TRUE	GATCTAGTCTACCTGC-1_contig_2	TRUE	704	TRA	TRAV8-2*01	None	TRAJ30*01	TRAC*01	TRUE	TRUE	CVVSDRDDKIIF	TGTGTTGTGAGTGATCGAGATGACAAGATCATCTTT	8040	3	clonotype1328	clonotype1328_consensus_1	single TCR
GATGAAACAGATCCAT-1	TRUE	GATGAAACAGATCCAT-1_contig_2	TRUE	649	TRB	TRBV28*01	TRBD1*01	TRBJ2-7*01	TRBC1*01	TRUE	TRUE	CASSSAPRDRVYEQYF	TGTGCCAGCAGTTCCGCACCTCGGGACAGGGTATACGAGCAGTACTTC	3426	1	clonotype1329	clonotype1329_consensus_2	single TCR
GATGAAACAGATCCAT-1	TRUE	GATGAAACAGATCCAT-1_contig_3	TRUE	558	TRA	TRAV12-3*01	None	TRAJ30*01	TRAC*01	TRUE	TRUE	CAMSARRGDDKIIF	TGTGCAATGAGCGCCAGGAGAGGAGATGACAAGATCATCTTT	3689	1	clonotype1329	clonotype1329_consensus_1	single TCR
GATGAAACAGCCAGAA-1	TRUE	GATGAAACAGCCAGAA-1_contig_1	TRUE	839	TRB	TRBV5-4*01	TRBD1*01	TRBJ1-2*01	TRBC1*01	TRUE	TRUE	CASSIHRGAYGYTF	TGTGCCAGCAGCATACACAGGGGGGCCTATGGCTACACCTTC	4423	3	clonotype1330	clonotype1330_consensus_2	single TCR
GATGAAACAGCCAGAA-1	TRUE	GATGAAACAGCCAGAA-1_contig_2	TRUE	518	TRA	TRAV35*01	None	TRAJ29*01	TRAC*01	TRUE	TRUE	CAGYSGNTPLVF	TGTGCTGGCTATTCAGGAAACACACCTCTTGTCTTT	4735	1	clonotype1330	clonotype1330_consensus_1	single TCR
GATTCAGGTCGCCATG-1	TRUE	GATTCAGGTCGCCATG-1_contig_1	TRUE	669	TRB	TRBV10-3*01	TRBD2*01	TRBJ2-7*01	TRBC2*01	TRUE	TRUE	CAINSPSRYEQYF	TGTGCCATCAACTCGCCTAGCAGGTACGAGCAGTACTTC	27162	9	clonotype1338	clonotype1338_consensus_2	single TCR
GATTCAGGTCGCCATG-1	TRUE	GATTCAGGTCGCCATG-1_contig_3	TRUE	551	TRA	TRAV29/DV5*01	None	TRAJ49*01	TRAC*01	TRUE	TRUE	CAASANTGNQFYF	TGTGCAGCAAGCGCGAACACCGGTAACCAGTTCTATTTT	3989	2	clonotype1338	clonotype1338_consensus_1	single TCR
GATTCAGGTTACCAGT-1	TRUE	GATTCAGGTTACCAGT-1_contig_1	TRUE	677	TRB	TRBV10-1*02	TRBD1*01	TRBJ2-7*01	TRBC2*01	TRUE	TRUE	CASSEGALTWQYF	TGCGCCAGCAGTGAAGGGGCCCTTACGTGGCAGTACTTC	6892	3	clonotype1339	clonotype1339_consensus_1	single TCR
GATTCAGGTTACCAGT-1	TRUE	GATTCAGGTTACCAGT-1_contig_2	TRUE	503	TRA	TRAV29/DV5*01	None	TRAJ38*01	TRAC*01	TRUE	TRUE	CAAPNAGNNRKLIW	TGTGCAGCGCCTAATGCTGGCAACAACCGTAAGCTGATTTGG	8553	2	clonotype1339	clonotype1339_consensus_2	single TCR
GCAAACTAGTGTGGCA-1	TRUE	GCAAACTAGTGTGGCA-1_contig_1	TRUE	687	TRB	TRBV7-3*01	TRBD2*02	TRBJ2-1*01	TRBC2*01	TRUE	TRUE	CASSLGSSGRAGNEQFF	TGTGCCAGCAGCTTAGGATCTAGCGGGAGGGCAGGCAATGAGCAGTTCTTC	7246	2	clonotype1343	clonotype1343_consensus_1	single TCR
GCAAACTAGTGTGGCA-1	TRUE	GCAAACTAGTGTGGCA-1_contig_4	TRUE	494	TRA	TRAV21*01	None	TRAJ15*01	TRAC*01	TRUE	TRUE	CAVDNQAGTALIF	TGTGCTGTGGACAACCAGGCAGGAACTGCTCTGATCTTT	3424	1	clonotype1343	clonotype1343_consensus_2	single TCR
GCAATCAAGCGAAGGG-1	TRUE	GCAATCAAGCGAAGGG-1_contig_1	TRUE	665	TRB	TRBV7-9*03	TRBD1*01	TRBJ2-3*01	TRBC2*01	TRUE	TRUE	CASTRGSTDTQYF	TGTGCCAGCACACGGGGCAGCACAGATACGCAGTATTTT	8183	2	clonotype1348	clonotype1348_consensus_1	single TCR
GCAATCAAGCGAAGGG-1	TRUE	GCAATCAAGCGAAGGG-1_contig_3	TRUE	579	TRA	TRAV23/DV6*01	None	TRAJ49*01	TRAC*01	TRUE	TRUE	CAASGGDTGNQFYF	TGTGCAGCAAGCGGGGGGGACACCGGTAACCAGTTCTATTTT	2659	1	clonotype1348	clonotype1348_consensus_2	single TCR
GCAATCAGTAGCTTGT-1	TRUE	GCAATCAGTAGCTTGT-1_contig_1	TRUE	534	TRA	TRAV20*01	None	TRAJ54*01	TRAC*01	TRUE	TRUE	CVTDVRGAQKLVF	TGTGTCACTGACGTCCGGGGAGCCCAGAAGCTGGTATTT	8218	2	clonotype1349	clonotype1349_consensus_1	single TCR
GCAATCAGTAGCTTGT-1	TRUE	GCAATCAGTAGCTTGT-1_contig_2	TRUE	676	TRB	TRBV4-1*01	TRBD1*01	TRBJ2-3*01	TRBC2*01	TRUE	TRUE	CASSQDPRTRATFTDTQYF	TGCGCCAGCAGCCAAGACCCCCGTACCAGGGCTACTTTCACAGATACGCAGTATTTT	7021	3	clonotype1349	clonotype1349_consensus_2	single TCR
GCACATAAGGCTCAGA-1	TRUE	GCACATAAGGCTCAGA-1_contig_1	TRUE	499	TRA	TRAV38-2/DV8*01	None	TRAJ53*01	TRAC*01	TRUE	TRUE	CACLSGGSNYKLTF	TGTGCTTGCCTTAGTGGAGGTAGCAACTATAAACTGACATTT	6885	2	clonotype1353	clonotype1353_consensus_2	single TCR
GCACATAAGGCTCAGA-1	TRUE	GCACATAAGGCTCAGA-1_contig_2	TRUE	717	TRB	TRBV7-8*01	TRBD2*02	TRBJ2-1*01	TRBC2*01	TRUE	TRUE	CASSLADRAAAGEVNEQFF	TGTGCCAGCAGCTTGGCGGATAGGGCGGCGGCGGGAGAGGTCAATGAGCAGTTCTTC	24126	7	clonotype1353	clonotype1353_consensus_1	single TCR
GCACATACACTGCCAG-1	TRUE	GCACATACACTGCCAG-1_contig_1	TRUE	681	TRB	TRBV12-3*01	None	TRBJ1-1*01	TRBC1*01	TRUE	TRUE	CASSLKNPGRAFF	TGTGCCAGCAGTTTAAAAAATCCAGGTCGGGCTTTCTTT	15157	5	clonotype1354	clonotype1354_consensus_2	single TCR
GCACATACACTGCCAG-1	TRUE	GCACATACACTGCCAG-1_contig_3	TRUE	469	TRA	TRAV13-1*01	None	TRAJ30*01	TRAC*01	TRUE	TRUE	CAASGRDDKIIF	TGTGCAGCAAGTGGTAGAGATGACAAGATCATCTTT	4603	1	clonotype1354	clonotype1354_consensus_1	single TCR
GCACTCTCAGGACGTA-1	TRUE	GCACTCTCAGGACGTA-1_contig_1	TRUE	716	TRA	TRAV1-1*01	None	TRAJ33*01	TRAC*01	TRUE	TRUE	CAVRSDSNYQLIW	TGCGCTGTGAGATCCGATAGCAACTATCAGTTAATCTGG	16379	4	clonotype1360	clonotype1360_consensus_2	single TCR
GCACTCTCAGGACGTA-1	TRUE	GCACTCTCAGGACGTA-1_contig_3	TRUE	499	TRB	TRBV28*01	TRBD1*01	TRBJ2-7*01	TRBC2*01	TRUE	TRUE	CASSGDRSYEQYF	TGTGCCAGCAGCGGGGACCGCTCCTACGAGCAGTACTTC	18417	5	clonotype1360	clonotype1360_consensus_1	single TCR
GCACTCTGTTCCGGCA-1	TRUE	GCACTCTGTTCCGGCA-1_contig_1	TRUE	692	TRB	TRBV12-3*01	TRBD2*01	TRBJ2-5*01	TRBC2*01	TRUE	TRUE	CASSRSTRGPQETQYF	TGTGCCAGCAGTCGTTCGACTAGAGGACCACAAGAGACCCAGTACTTC	8876	3	clonotype1362	clonotype1362_consensus_2	single TCR
GCACTCTGTTCCGGCA-1	TRUE	GCACTCTGTTCCGGCA-1_contig_3	TRUE	512	TRA	TRAV6*01	None	TRAJ5*01	TRAC*01	TRUE	TRUE	CALDMGTGRRALTF	TGTGCTCTAGACATGGGGACGGGCAGGAGAGCACTTACTTTT	8391	2	clonotype1362	clonotype1362_consensus_1	single TCR
GCACTCTTCGTTACAG-1	TRUE	GCACTCTTCGTTACAG-1_contig_1	TRUE	673	TRB	TRBV5-5*01	None	TRBJ2-6*01	TRBC2*01	TRUE	TRUE	CASSLEATRSGANVLTF	TGTGCCAGCAGCTTGGAGGCTACCCGGTCTGGGGCCAACGTCCTGACTTTC	10177	3	clonotype1364	clonotype1364_consensus_2	single TCR
GCACTCTTCGTTACAG-1	TRUE	GCACTCTTCGTTACAG-1_contig_2	TRUE	617	TRA	TRAV8-4*01	None	TRAJ39*01	TRAC*01	TRUE	TRUE	CAVINNAGNMLTF	TGTGCTGTGATTAATAATGCAGGCAACATGCTCACCTTT	3122	1	clonotype1364	clonotype1364_consensus_1	single TCR
GCAGCCAAGATCACGG-1	TRUE	GCAGCCAAGATCACGG-1_contig_1	TRUE	524	TRB	TRBV20-1*02	None	TRBJ2-1*01	TRBC2*01	TRUE	TRUE	CSAIPRRVDEQFF	TGCAGTGCTATCCCCCGGCGAGTCGATGAGCAGTTCTTC	9550	3	clonotype1366	clonotype1366_consensus_1	single TCR
GCAGCCAAGATCACGG-1	TRUE	GCAGCCAAGATCACGG-1_contig_2	TRUE	584	TRA	TRAV26-1*01	None	TRAJ44*01	TRAC*01	TRUE	TRUE	CIVRVLNTGTASKLTF	TGCATCGTCAGAGTCTTAAATACCGGCACTGCCAGTAAACTCACCTTT	3885	1	clonotype1366	clonotype1366_consensus_2	single TCR
GCAGCCATCTAACTCT-1	TRUE	GCAGCCATCTAACTCT-1_contig_1	TRUE	516	TRA	TRAV21*01	None	TRAJ28*01	TRAC*01	TRUE	TRUE	CAFMGAGSYQLTF	TGTGCTTTCATGGGGGCTGGGAGTTACCAACTCACTTTC	8179	2	clonotype1371	clonotype1371_consensus_2	single TCR
GCAGCCATCTAACTCT-1	TRUE	GCAGCCATCTAACTCT-1_contig_3	TRUE	490	TRB	TRBV5-1*01	TRBD2*01	TRBJ2-5*01	TRBC2*01	TRUE	TRUE	CASSPHSLGLAGHLTQYF	TGCGCCAGCAGCCCACACAGTCTCGGACTAGCGGGGCACCTGACCCAGTACTTC	681	1	clonotype1371	clonotype1371_consensus_1	single TCR
GCAGTTAGTAGCGTGA-1	TRUE	GCAGTTAGTAGCGTGA-1_contig_1	TRUE	653	TRB	TRBV3-1*01	TRBD2*01	TRBJ2-7*01	TRBC2*01	TRUE	TRUE	CASSQSGVRLAGSSYEQYF	TGTGCCAGCAGCCAATCGGGGGTAAGACTAGCGGGGTCGTCCTACGAGCAGTACTTC	12104	5	clonotype1375	clonotype1375_consensus_2	single TCR
GCAGTTAGTAGCGTGA-1	TRUE	GCAGTTAGTAGCGTGA-1_contig_2	TRUE	677	TRA	TRAV8-3*01	None	TRAJ27*01	TRAC*01	TRUE	TRUE	CAVLNTNAGKSTF	TGTGCTGTGCTGAACACCAATGCAGGCAAATCAACCTTT	3404	1	clonotype1375	clonotype1375_consensus_1	single TCR
GCAGTTAGTGTGGCTC-1	TRUE	GCAGTTAGTGTGGCTC-1_contig_1	TRUE	700	TRB	TRBV20-1*02	None	TRBJ1-5*01	TRBC1*01	TRUE	TRUE	CSALRRPNQPQHF	TGCAGTGCCCTTAGGAGACCCAATCAGCCCCAGCATTTT	27505	12	clonotype1376	clonotype1376_consensus_1	single TCR
GCAGTTAGTGTGGCTC-1	TRUE	GCAGTTAGTGTGGCTC-1_contig_2	TRUE	773	TRA	TRAV14/DV4*02	None	TRAJ24*02	TRAC*01	TRUE	TRUE	CAMREGRETDSWGKLQF	TGTGCAATGAGAGAGGGCCGGGAAACTGACAGCTGGGGGAAATTGCAGTTT	22308	7	clonotype1376	clonotype1376_consensus_2	single TCR
GCATACACAAGCGTAG-1	TRUE	GCATACACAAGCGTAG-1_contig_1	TRUE	687	TRB	TRBV27*01	TRBD1*01	TRBJ1-2*01	TRBC1*01	TRUE	TRUE	CASSSASPGQGGGYTF	TGTGCCAGCAGTTCCGCCAGCCCCGGACAGGGCGGGGGCTACACCTTC	8022	5	clonotype1380	clonotype1380_consensus_2	single TCR
GCATACACAAGCGTAG-1	TRUE	GCATACACAAGCGTAG-1_contig_3	TRUE	584	TRA	TRAV29/DV5*01	None	TRAJ18*01	TRAC*01	TRUE	TRUE	CAASDRGSTLGRLYF	TGTGCAGCAAGCGACAGAGGCTCAACCCTGGGGAGGCTATACTTT	5343	2	clonotype1380	clonotype1380_consensus_1	single TCR
GCATACAGTGCACTTA-1	TRUE	GCATACAGTGCACTTA-1_contig_1	TRUE	677	TRB	TRBV19*01	TRBD1*01	TRBJ2-7*01	TRBC2*01	TRUE	TRUE	CASSLGQGYEQYF	TGTGCCAGTAGTCTCGGACAGGGCTACGAGCAGTACTTC	6332	3	clonotype1383	clonotype1383_consensus_1	single TCR
GCATACAGTGCACTTA-1	TRUE	GCATACAGTGCACTTA-1_contig_2	TRUE	572	TRA	TRAV29/DV5*01	None	TRAJ43*01	TRAC*01	TRUE	TRUE	CAARASNDMRF	TGTGCAGCAAGGGCGTCCAATGACATGCGCTTT	4130	1	clonotype1383	clonotype1383_consensus_2	single TCR
GCATACATCATGGTCA-1	TRUE	GCATACATCATGGTCA-1_contig_1	TRUE	543	TRA	TRAV12-2*01	None	TRAJ20*01	TRAC*01	TRUE	TRUE	CAVGPFKLSF	TGTGCCGTGGGCCCCTTCAAGCTCAGCTTT	11460	4	clonotype1384	clonotype1384_consensus_2	single TCR
GCATACATCATGGTCA-1	TRUE	GCATACATCATGGTCA-1_contig_3	TRUE	865	TRB	TRBV5-4*01	TRBD1*01	TRBJ1-1*01	TRBC1*01	TRUE	TRUE	CASSLLQGVMMNTEAFF	TGTGCCAGCAGCTTGCTACAGGGGGTCATGATGAACACTGAAGCTTTCTTT	2785	1	clonotype1384	clonotype1384_consensus_1	single TCR
GCATACATCTTGCAAG-1	TRUE	GCATACATCTTGCAAG-1_contig_1	TRUE	507	TRA	TRAV13-1*01	None	TRAJ26*01	TRAC*01	TRUE	TRUE	CAVPKGGQNFVF	TGTGCAGTCCCCAAGGGCGGCCAGAATTTTGTCTTT	9707	3	clonotype1385	clonotype1385_consensus_2	single TCR
GCATACATCTTGCAAG-1	TRUE	GCATACATCTTGCAAG-1_contig_2	TRUE	825	TRB	TRBV19*01	TRBD2*02	TRBJ1-2*01	TRBC1*01	TRUE	TRUE	CASSIGGNPVYGYTF	TGTGCCAGTAGTATCGGAGGAAATCCTGTCTATGGCTACACCTTC	7177	4	clonotype1385	clonotype1385_consensus_1	single TCR
GCATGATGTACTCAAC-1	TRUE	GCATGATGTACTCAAC-1_contig_1	TRUE	700	TRB	TRBV14*01	TRBD2*02	TRBJ1-4*01	TRBC1*01	TRUE	TRUE	CASSHRGRAVEKLFF	TGTGCCAGCAGCCATCGAGGAAGGGCAGTCGAAAAACTGTTTTTT	16280	6	clonotype1386	clonotype1386_consensus_1	single TCR
GCATGATGTACTCAAC-1	TRUE	GCATGATGTACTCAAC-1_contig_3	TRUE	558	TRA	TRAV10*01	None	TRAJ35*01	TRAC*01	TRUE	TRUE	CVVFFI	TGTGTGGTCTTTTTTATA	3615	1	clonotype1386	clonotype1386_consensus_2	single TCR
GCATGATGTGGAAAGA-1	TRUE	GCATGATGTGGAAAGA-1_contig_1	TRUE	658	TRB	TRBV11-1*01	TRBD1*01	TRBJ2-2*01	TRBC2*01	TRUE	TRUE	CASSLSAGPNTGELFF	TGTGCCAGCAGCTTATCCGCAGGGCCGAACACCGGGGAGCTGTTTTTT	12575	5	clonotype1387	clonotype1387_consensus_1	single TCR
GCATGATGTGGAAAGA-1	TRUE	GCATGATGTGGAAAGA-1_contig_2	TRUE	563	TRA	TRAV12-2*01	None	TRAJ57*01	TRAC*01	TRUE	TRUE	CAVNPGGWFQGGSEKLVF	TGTGCCGTGAACCCCGGGGGTTGGTTTCAGGGCGGATCTGAAAAGCTGGTCTTT	1905	1	clonotype1387	clonotype1387_consensus_2	single TCR
GCATGCGTCATCTGTT-1	TRUE	GCATGCGTCATCTGTT-1_contig_1	TRUE	525	TRB	TRBV11-3*01	TRBD1*01	TRBJ2-2*01	TRBC2*01	TRUE	TRUE	CASSLELWPDNTGELFF	TGTGCCAGCAGCTTAGAGTTGTGGCCAGACAACACCGGGGAGCTGTTTTTT	5954	2	clonotype1391	clonotype1391_consensus_1	single TCR
GCATGCGTCATCTGTT-1	TRUE	GCATGCGTCATCTGTT-1_contig_2	TRUE	531	TRA	TRAV26-1*01	None	TRAJ36*01	TRAC*01	TRUE	TRUE	CIVSYQTGANNLFF	TGCATCGTCAGTTATCAAACTGGGGCAAACAACCTCTTCTTT	2743	1	clonotype1391	clonotype1391_consensus_2	single TCR
GCATGTAAGCCTCGTG-1	TRUE	GCATGTAAGCCTCGTG-1_contig_1	TRUE	688	TRB	TRBV3-1*01	TRBD1*01	TRBJ2-3*01	TRBC2*01	TRUE	TRUE	CASSQAGPGTQYF	TGTGCCAGCAGCCAAGCGGGACCAGGGACGCAGTATTTT	17377	7	clonotype1392	clonotype1392_consensus_1	single TCR
GCATGTAAGCCTCGTG-1	TRUE	GCATGTAAGCCTCGTG-1_contig_2	TRUE	768	TRA	TRAV20*01	None	TRAJ45*01	TRAC*01	TRUE	TRUE	CAVQARGGGADGLTF	TGTGCTGTGCAGGCGAGGGGAGGAGGTGCTGACGGACTCACCTTT	10964	5	clonotype1392	clonotype1392_consensus_2	single TCR
GCATGTACAAATACAG-1	TRUE	GCATGTACAAATACAG-1_contig_1	TRUE	921	TRB	TRBV13*01	TRBD2*02	TRBJ2-3*01	TRBC2*01	TRUE	TRUE	CASSSQRELGDTQYF	TGTGCCAGCAGCTCCCAGCGGGAGCTTGGAGATACGCAGTATTTT	13687	8	clonotype1394	clonotype1394_consensus_1	single TCR
GCATGTACAAATACAG-1	TRUE	GCATGTACAAATACAG-1_contig_3	TRUE	539	TRA	TRAV12-2*01	None	TRAJ30*01	TRAC*01	TRUE	TRUE	CAVRDDKIIF	TGTGCCGTGAGAGATGACAAGATCATCTTT	3196	1	clonotype1394	clonotype1394_consensus_2	single TCR
GCATGTAGTCATGCAT-1	TRUE	GCATGTAGTCATGCAT-1_contig_1	TRUE	726	TRB	TRBV4-1*01	TRBD1*01	TRBJ2-1*01	TRBC2*01	TRUE	TRUE	CASSQGGQASSYNEQFF	TGCGCCAGCAGCCAGGGGGGACAGGCGAGCTCCTACAATGAGCAGTTCTTC	12487	6	clonotype1395	clonotype1395_consensus_1	single TCR
GCATGTAGTCATGCAT-1	TRUE	GCATGTAGTCATGCAT-1_contig_4	TRUE	485	TRA	TRAV13-1*01	None	TRAJ18*01	TRAC*01	TRUE	TRUE	CAARKGRGSTLGRLYF	TGTGCAGCAAGGAAGGGCAGAGGCTCAACCCTGGGGAGGCTATACTTT	3880	1	clonotype1395	clonotype1395_consensus_2	single TCR
GCATGTAGTTTACTCT-1	TRUE	GCATGTAGTTTACTCT-1_contig_1	TRUE	486	TRB	TRBV28*01	TRBD2*02	TRBJ2-7*01	TRBC2*01	TRUE	TRUE	CASSFASGSAPSYEQYF	TGTGCCAGCAGTTTCGCTAGCGGGAGCGCCCCCTCCTACGAGCAGTACTTC	3340	1	clonotype1396	clonotype1396_consensus_2	single TCR
GCATGTAGTTTACTCT-1	TRUE	GCATGTAGTTTACTCT-1_contig_2	TRUE	505	TRA	TRAV6*01	None	TRAJ9*01	TRAC*01	TRUE	TRUE	CALGTGGFKTIF	TGTGCTCTAGGCACTGGAGGCTTCAAAACTATCTTT	1957	1	clonotype1396	clonotype1396_consensus_1	single TCR
GCCAAATCAAGGACTG-1	TRUE	GCCAAATCAAGGACTG-1_contig_1	TRUE	552	TRA	TRAV12-3*01	None	TRAJ21*01	TRAC*01	TRUE	TRUE	CAMSANFNKFYF	TGTGCAATGAGCGCCAACTTCAACAAATTTTACTTT	3132	1	clonotype1399	clonotype1399_consensus_1	single TCR
GCCAAATCAAGGACTG-1	TRUE	GCCAAATCAAGGACTG-1_contig_3	TRUE	666	TRB	TRBV9*01	None	TRBJ2-1*01	TRBC1*01	TRUE	TRUE	CASSVAGEQFF	TGTGCCAGCAGCGTAGCCGGTGAGCAGTTCTTC	14130	4	clonotype1399	clonotype1399_consensus_2	single TCR
GCCAAATGTCAGGACA-1	TRUE	GCCAAATGTCAGGACA-1_contig_1	TRUE	696	TRB	TRBV3-1*01	TRBD2*01	TRBJ2-3*01	TRBC2*01	TRUE	TRUE	CASSLAGGMSDTQYF	TGTGCCAGCAGCCTCGCGGGGGGGATGTCAGATACGCAGTATTTT	8465	4	clonotype1400	clonotype1400_consensus_1	single TCR
GCCAAATGTCAGGACA-1	TRUE	GCCAAATGTCAGGACA-1_contig_3	TRUE	534	TRA	TRAV13-2*01	None	TRAJ52*01	TRAC*01	TRUE	TRUE	CANAGGTSYGKLTF	TGTGCTAATGCTGGTGGTACTAGCTATGGAAAGCTGACATTT	7105	2	clonotype1400	clonotype1400_consensus_2	single TCR
GCCAAATGTTCACGGC-1	TRUE	GCCAAATGTTCACGGC-1_contig_1	TRUE	684	TRB	TRBV10-3*01	TRBD2*02	TRBJ2-1*01	TRBC2*01	TRUE	TRUE	CAISFNGRGYNEQFF	TGTGCCATCAGTTTTAACGGGAGGGGGTACAATGAGCAGTTCTTC	14767	5	clonotype1401	clonotype1401_consensus_1	single TCR
GCCAAATGTTCACGGC-1	TRUE	GCCAAATGTTCACGGC-1_contig_4	TRUE	483	TRA	TRAV29/DV5*01	None	TRAJ57*01	TRAC*01	TRUE	TRUE	CSQGGSEKLVF	TGTTCTCAGGGCGGATCTGAAAAGCTGGTCTTT	4196	1	clonotype1401	clonotype1401_consensus_2	single TCR
GCCTCTACAAGGTTCT-1	TRUE	GCCTCTACAAGGTTCT-1_contig_1	TRUE	521	TRA	TRAV1-2*01	None	TRAJ6*01	TRAC*01	TRUE	TRUE	CAVRDQSGGSYIPTF	TGTGCTGTGAGGGACCAATCAGGAGGAAGCTACATACCTACATTT	6724	2	clonotype1404	clonotype1404_consensus_2	single TCR
GCCTCTACAAGGTTCT-1	TRUE	GCCTCTACAAGGTTCT-1_contig_2	TRUE	667	TRB	TRBV5-1*01	None	TRBJ1-1*01	TRBC1*01	TRUE	TRUE	CASSLETQDMNTEAFF	TGCGCCAGCAGCTTAGAGACCCAGGATATGAACACTGAAGCTTTCTTT	7079	3	clonotype1404	clonotype1404_consensus_1	single TCR
GCCTCTACATTCTCAT-1	TRUE	GCCTCTACATTCTCAT-1_contig_1	TRUE	657	TRB	TRBV10-2*01	TRBD1*01	TRBJ2-1*01	TRBC2*01	TRUE	TRUE	CASSERLEYDEQFF	TGCGCCAGCAGTGAGAGACTGGAGTACGATGAGCAGTTCTTC	1836	1	clonotype1405	clonotype1405_consensus_2	single TCR
GCCTCTACATTCTCAT-1	TRUE	GCCTCTACATTCTCAT-1_contig_2	TRUE	556	TRA	TRAV12-2*01	None	TRAJ42*01	TRAC*01	TRUE	TRUE	CAVPNYGGSQGNLIF	TGTGCCGTACCGAATTATGGAGGAAGCCAAGGAAATCTCATCTTT	5120	2	clonotype1405	clonotype1405_consensus_1	single TCR
GCGACCACACTATCTT-1	TRUE	GCGACCACACTATCTT-1_contig_2	TRUE	634	TRB	TRBV19*01	TRBD1*01	TRBJ2-1*01	TRBC2*01	TRUE	TRUE	CASSVTGGNEQFF	TGTGCCAGTAGTGTTACAGGGGGCAATGAGCAGTTCTTC	3506	2	clonotype1408	clonotype1408_consensus_1	single TCR
GCGACCACACTATCTT-1	TRUE	GCGACCACACTATCTT-1_contig_3	TRUE	545	TRA	TRAV24*01	None	TRAJ15*01	TRAC*01	TRUE	TRUE	CAFNQAGTALIF	TGTGCCTTTAACCAGGCAGGAACTGCTCTGATCTTT	5862	1	clonotype1408	clonotype1408_consensus_2	single TCR
GCGACCAGTCCAACTA-1	TRUE	GCGACCAGTCCAACTA-1_contig_2	TRUE	701	TRB	TRBV11-3*01	TRBD1*01	TRBJ1-6*01	TRBC1*01	TRUE	TRUE	CASSLGDRNSPLHF	TGTGCCAGCAGCTTAGGGGACAGGAATTCACCCCTCCACTTT	3120	1	clonotype1409	clonotype1409_consensus_1	single TCR
GCGACCAGTCCAACTA-1	TRUE	GCGACCAGTCCAACTA-1_contig_5	TRUE	690	TRA	TRAV8-3*01	None	TRAJ10*01	TRAC*01	TRUE	TRUE	CAVQILTGGGNKLTF	TGTGCTGTGCAAATACTCACGGGAGGAGGAAACAAACTCACCTTT	8825	3	clonotype1409	clonotype1409_consensus_2	single TCR
GCGAGAATCTTTAGTC-1	TRUE	GCGAGAATCTTTAGTC-1_contig_2	TRUE	505	TRA	TRAV26-1*01	None	TRAJ49*01	TRAC*01	TRUE	TRUE	CIVRVPNTGNQFYF	TGCATCGTCAGAGTCCCTAACACCGGTAACCAGTTCTATTTT	3890	1	clonotype1412	clonotype1412_consensus_2	single TCR
GCGAGAATCTTTAGTC-1	TRUE	GCGAGAATCTTTAGTC-1_contig_3	TRUE	719	TRB	TRBV28*01	None	TRBJ2-1*01	TRBC2*01	TRUE	TRUE	CASSVLMNEQFF	TGTGCCAGCAGTGTACTGATGAATGAGCAGTTCTTC	2208	1	clonotype1412	clonotype1412_consensus_1	single TCR
GCGCAACAGGCCCGTT-1	TRUE	GCGCAACAGGCCCGTT-1_contig_1	TRUE	592	TRB	TRBV18*01	TRBD1*01	TRBJ2-5*01	TRBC2*01	TRUE	TRUE	CASSNQRTGKTQYF	TGTGCCAGCTCCAACCAGAGGACAGGGAAGACCCAGTACTTC	9013	4	clonotype1413	clonotype1413_consensus_2	single TCR
GCGCAACAGGCCCGTT-1	TRUE	GCGCAACAGGCCCGTT-1_contig_2	TRUE	646	TRA	TRAV3*01	None	TRAJ20*01	TRAC*01	TRUE	TRUE	CAVCLHDYKLSF	TGTGCTGTGTGCTTACACGACTACAAGCTCAGCTTT	2928	1	clonotype1413	clonotype1413_consensus_1	single TCR
GCGCAACAGTGAAGAG-1	TRUE	GCGCAACAGTGAAGAG-1_contig_1	TRUE	683	TRB	TRBV7-6*01	TRBD2*01	TRBJ2-7*01	TRBC2*01	TRUE	TRUE	CASSLVPSGDYEQYF	TGTGCCAGCAGCTTAGTTCCTAGCGGCGATTACGAGCAGTACTTC	28110	8	clonotype1414	clonotype1414_consensus_2	single TCR
GCGCAACAGTGAAGAG-1	TRUE	GCGCAACAGTGAAGAG-1_contig_2	TRUE	509	TRA	TRAV38-2/DV8*01	None	TRAJ39*01	TRAC*01	TRUE	TRUE	CAYIEGAGNMLTF	TGTGCTTATATTGAGGGTGCAGGCAACATGCTCACCTTT	7612	2	clonotype1414	clonotype1414_consensus_1	single TCR
GCGCAACCATGTCGAT-1	TRUE	GCGCAACCATGTCGAT-1_contig_1	TRUE	718	TRB	TRBV20-1*02	TRBD1*01	TRBJ2-1*01	TRBC2*01	TRUE	TRUE	CSARTRDAGRHEQFF	TGCAGTGCTCGGACAAGGGACGCCGGTAGGCATGAGCAGTTCTTC	42932	12	clonotype1415	clonotype1415_consensus_2	single TCR
GCGCAACCATGTCGAT-1	TRUE	GCGCAACCATGTCGAT-1_contig_2	TRUE	480	TRA	TRAV12-1*01	None	TRAJ44*01	TRAC*01	TRUE	TRUE	CVTGTASKLTF	TGTGTGACCGGCACTGCCAGTAAACTCACCTTT	4504	2	clonotype1415	clonotype1415_consensus_1	single TCR
GCGCAGTCATCGATGT-1	TRUE	GCGCAGTCATCGATGT-1_contig_1	TRUE	720	TRB	TRBV6-2*01	TRBD1*01	TRBJ2-7*01	TRBC2*01	TRUE	TRUE	CASSYGGAYEQYF	TGTGCCAGCAGTTACGGGGGCGCTTACGAGCAGTACTTC	11848	6	clonotype1418	clonotype1418_consensus_2	single TCR
GCGCAGTCATCGATGT-1	TRUE	GCGCAGTCATCGATGT-1_contig_2	TRUE	532	TRA	TRAV17*01	None	TRAJ12*01	TRAC*01	TRUE	TRUE	CATGILMDSSYKLIF	TGTGCTACGGGGATACTGATGGATAGCAGCTATAAATTGATCTTC	4664	2	clonotype1418	clonotype1418_consensus_1	single TCR
GCGCAGTGTTAAAGTG-1	TRUE	GCGCAGTGTTAAAGTG-1_contig_1	TRUE	735	TRB	TRBV28*01	TRBD1*01	TRBJ2-5*01	TRBC2*01	TRUE	TRUE	CASSLGGAGRAQETQYF	TGTGCCAGCAGTTTAGGGGGCGCGGGACGCGCTCAAGAGACCCAGTACTTC	6986	3	clonotype1420	clonotype1420_consensus_2	single TCR
GCGCAGTGTTAAAGTG-1	TRUE	GCGCAGTGTTAAAGTG-1_contig_2	TRUE	603	TRA	TRAV17*01	None	TRAJ24*02	TRAC*01	TRUE	TRUE	CATHSWGKLQF	TGTGCTACGCACAGCTGGGGGAAATTGCAGTTT	6525	2	clonotype1420	clonotype1420_consensus_1	single TCR
GCGCCAACATGTAAGA-1	TRUE	GCGCCAACATGTAAGA-1_contig_1	TRUE	688	TRB	TRBV14*01	TRBD1*01	TRBJ1-1*01	TRBC1*01	TRUE	TRUE	CASSQVDGTEAFF	TGTGCCAGCAGCCAAGTGGACGGGACAGAAGCTTTCTTT	11730	5	clonotype1422	clonotype1422_consensus_2	single TCR
GCGCCAACATGTAAGA-1	TRUE	GCGCCAACATGTAAGA-1_contig_3	TRUE	559	TRA	TRAV12-3*01	None	TRAJ21*01	TRAC*01	TRUE	TRUE	CAMSRPYNFNKFYF	TGTGCAATGAGCAGACCTTACAACTTCAACAAATTTTACTTT	15962	4	clonotype1422	clonotype1422_consensus_1	single TCR
GCGCCAAGTCGTCTTC-1	TRUE	GCGCCAAGTCGTCTTC-1_contig_1	TRUE	702	TRB	TRBV14*01	TRBD2*02	TRBJ2-7*01	TRBC2*01	TRUE	TRUE	CASSQDFLAGGDEQYF	TGTGCCAGCAGCCAAGATTTTTTAGCGGGAGGGGACGAGCAGTACTTC	16694	6	clonotype1423	clonotype1423_consensus_1	single TCR
GCGCCAAGTCGTCTTC-1	TRUE	GCGCCAAGTCGTCTTC-1_contig_5	TRUE	655	TRA	TRAV8-4*01	None	TRAJ54*01	TRAC*01	TRUE	TRUE	CAVSHLLEGAQKLVF	TGTGCTGTGAGTCACCTTCTGGAGGGAGCCCAGAAGCTGGTATTT	6058	2	clonotype1423	clonotype1423_consensus_2	single TCR
GCGCCAAGTTACAGAA-1	TRUE	GCGCCAAGTTACAGAA-1_contig_1	TRUE	649	TRB	TRBV4-2*01	None	TRBJ1-1*01	TRBC1*01	TRUE	TRUE	CASSQNTEAFF	TGTGCCAGCAGCCAAAACACTGAAGCTTTCTTT	11629	5	clonotype1424	clonotype1424_consensus_1	single TCR
GCGCCAAGTTACAGAA-1	TRUE	GCGCCAAGTTACAGAA-1_contig_2	TRUE	772	TRA	TRAV12-1*01	None	TRAJ6*01	TRAC*01	TRUE	TRUE	CVVTISGGSYIPTF	TGTGTGGTGACTATTTCAGGAGGAAGCTACATACCTACATTT	7219	4	clonotype1424	clonotype1424_consensus_2	single TCR
GCGCCAATCCGTTGTC-1	TRUE	GCGCCAATCCGTTGTC-1_contig_1	TRUE	642	TRA	TRAV12-2*01	None	TRAJ22*01	TRAC*01	TRUE	TRUE	CAVRGSARQLTF	TGTGCCGTGCGGGGTTCTGCAAGGCAACTGACCTTT	9516	3	clonotype1425	clonotype1425_consensus_2	single TCR
GCGCCAATCCGTTGTC-1	TRUE	GCGCCAATCCGTTGTC-1_contig_2	TRUE	682	TRB	TRBV6-5*01	TRBD1*01	TRBJ1-2*01	TRBC1*01	TRUE	TRUE	CASTRGQGHLQGYGYTF	TGTGCCAGCACCAGGGGACAGGGCCACTTACAGGGTTATGGCTACACCTTC	3389	2	clonotype1425	clonotype1425_consensus_1	single TCR
GCGCGATCACGTGAGA-1	TRUE	GCGCGATCACGTGAGA-1_contig_1	TRUE	705	TRB	TRBV20-1*02	None	TRBJ2-3*01	TRBC2*01	TRUE	TRUE	CSARALKSTDTQYF	TGCAGTGCTCGGGCCTTAAAGAGCACAGATACGCAGTATTTT	20717	8	clonotype1426	clonotype1426_consensus_2	single TCR
GCGCGATCACGTGAGA-1	TRUE	GCGCGATCACGTGAGA-1_contig_3	TRUE	707	TRA	TRAV1-2*01	None	TRAJ20*01	TRAC*01	TRUE	TRUE	CAVRGFNDYKLSF	TGTGCTGTGAGAGGTTTTAACGACTACAAGCTCAGCTTT	7049	2	clonotype1426	clonotype1426_consensus_1	single TCR
GCGCGATGTCAATGTC-1	TRUE	GCGCGATGTCAATGTC-1_contig_1	TRUE	533	TRB	TRBV20-1*02	TRBD2*01	TRBJ1-3*01	TRBC1*01	TRUE	TRUE	CSVDYRNTIYF	TGCAGTGTGGATTATCGAAACACCATATATTTT	10349	3	clonotype1429	clonotype1429_consensus_1	single TCR
GCGCGATGTCAATGTC-1	TRUE	GCGCGATGTCAATGTC-1_contig_3	TRUE	470	TRA	TRAV21*01	None	TRAJ12*01	TRAC*01	TRUE	TRUE	CAVRRVDSSYKLIF	TGTGCTGTGAGGCGCGTGGATAGCAGCTATAAATTGATCTTC	5516	2	clonotype1429	clonotype1429_consensus_2	single TCR
GCGGGTTCACGTGAGA-1	TRUE	GCGGGTTCACGTGAGA-1_contig_1	TRUE	488	TRB	TRBV4-1*01	TRBD2*02	TRBJ1-1*01	TRBC1*01	TRUE	TRUE	CASSQGGRWMNTEAFF	TGCGCCAGCAGCCAAGGGGGGAGGTGGATGAACACTGAAGCTTTCTTT	6372	2	clonotype1432	clonotype1432_consensus_2	single TCR
GCGGGTTCACGTGAGA-1	TRUE	GCGGGTTCACGTGAGA-1_contig_2	TRUE	582	TRA	TRAV19*01	None	TRAJ49*01	TRAC*01	TRUE	TRUE	CALSEANTGNQFYF	TGTGCTCTGAGTGAGGCGAACACCGGTAACCAGTTCTATTTT	3722	2	clonotype1432	clonotype1432_consensus_1	single TCR
GCGGGTTCATACTCTT-1	TRUE	GCGGGTTCATACTCTT-1_contig_1	TRUE	667	TRB	TRBV4-1*01	TRBD1*01	TRBJ1-6*01	TRBC1*01	TRUE	TRUE	CASSQDRAGGMGSPLHF	TGCGCCAGCAGCCAAGATAGGGCAGGGGGCATGGGTTCACCCCTCCACTTT	10786	4	clonotype1433	clonotype1433_consensus_2	single TCR
GCGGGTTCATACTCTT-1	TRUE	GCGGGTTCATACTCTT-1_contig_4	TRUE	504	TRA	TRAV29/DV5*01	None	TRAJ20*01	TRAC*01	TRUE	TRUE	CAVRCKLSF	TGTGCAGTTCGGTGCAAGCTCAGCTTT	4048	1	clonotype1433	clonotype1433_consensus_1	single TCR
GCGGGTTGTGCAGACA-1	TRUE	GCGGGTTGTGCAGACA-1_contig_1	TRUE	689	TRB	TRBV11-2*01	TRBD1*01	TRBJ2-3*01	TRBC1*01	TRUE	TRUE	CASSLDHGTDTQYF	TGTGCCAGCAGCTTAGATCATGGGACAGATACGCAGTATTTT	6939	3	clonotype1434	clonotype1434_consensus_2	single TCR
GCGGGTTGTGCAGACA-1	TRUE	GCGGGTTGTGCAGACA-1_contig_3	TRUE	491	TRA	TRAV5*01	None	TRAJ16*01	TRAC*01	TRUE	TRUE	CAETPRDGQKLLF	TGTGCAGAGACCCCCAGAGATGGCCAGAAGCTGCTCTTT	4190	1	clonotype1434	clonotype1434_consensus_1	single TCR
GCTCTGTAGCAATCTC-1	TRUE	GCTCTGTAGCAATCTC-1_contig_1	TRUE	795	TRA	TRAV13-1*01	None	TRAJ13*02	TRAC*01	TRUE	TRUE	CAANTGGYQKVTF	TGTGCAGCAAATACTGGGGGTTACCAGAAAGTTACCTTT	6776	5	clonotype1438	clonotype1438_consensus_1	single TCR
GCTCTGTAGCAATCTC-1	TRUE	GCTCTGTAGCAATCTC-1_contig_2	TRUE	696	TRB	TRBV6-6*02	TRBD2*02	TRBJ1-3*01	TRBC1*01	TRUE	TRUE	CASRPNTGTDSGNTIYF	TGTGCCAGCAGACCAAATACCGGGACGGACTCTGGAAACACCATATATTTT	4726	2	clonotype1438	clonotype1438_consensus_2	single TCR
GCTCTGTCACGGATAG-1	TRUE	GCTCTGTCACGGATAG-1_contig_1	TRUE	692	TRB	TRBV5-1*01	TRBD1*01	TRBJ1-1*01	TRBC1*01	TRUE	TRUE	CASSQRTGQTTEAFF	TGCGCCAGCAGCCAAAGGACAGGGCAGACCACTGAAGCTTTCTTT	21744	7	clonotype1439	clonotype1439_consensus_2	single TCR
GCTCTGTCACGGATAG-1	TRUE	GCTCTGTCACGGATAG-1_contig_4	TRUE	579	TRA	TRAV29/DV5*01	None	TRAJ23*01	TRAC*01	TRUE	TRUE	CAASGNNQGGKLIF	TGTGCAGCAAGCGGAAATAACCAGGGAGGAAAGCTTATCTTC	3028	1	clonotype1439	clonotype1439_consensus_1	single TCR
GCTCTGTCATTCCTCG-1	TRUE	GCTCTGTCATTCCTCG-1_contig_1	TRUE	689	TRA	TRAV3*01	None	TRAJ22*01	TRAC*01	TRUE	TRUE	CAVSALSGSARQLTF	TGTGCTGTGAGCGCCCTTTCTGGTTCTGCAAGGCAACTGACCTTT	11499	4	clonotype1440	clonotype1440_consensus_2	single TCR
GCTCTGTCATTCCTCG-1	TRUE	GCTCTGTCATTCCTCG-1_contig_3	TRUE	707	TRB	TRBV27*01	TRBD2*02	TRBJ2-2*01	TRBC2*01	TRUE	TRUE	CASSFPGLAGVAGELFF	TGTGCCAGCAGTTTTCCGGGACTAGCGGGAGTAGCGGGGGAGCTGTTTTTT	6432	2	clonotype1440	clonotype1440_consensus_1	single TCR
GCTCTGTGTAAATGTG-1	TRUE	GCTCTGTGTAAATGTG-1_contig_1	TRUE	653	TRB	TRBV28*01	TRBD1*01	TRBJ1-5*01	TRBC1*01	TRUE	TRUE	CASSLWLGQGANQPQHF	TGTGCCAGCAGTTTATGGTTGGGACAGGGGGCGAATCAGCCCCAGCATTTT	6780	2	clonotype1441	clonotype1441_consensus_1	single TCR
GCTCTGTGTAAATGTG-1	TRUE	GCTCTGTGTAAATGTG-1_contig_4	TRUE	463	TRA	TRAV13-1*01	None	TRAJ7*01	TRAC*01	TRUE	TRUE	CAASVSGNNRLAF	TGTGCAGCAAGTGTTTCGGGGAACAACAGACTCGCTTTT	4624	1	clonotype1441	clonotype1441_consensus_2	single TCR
GCTGCAGAGTAAGTAC-1	TRUE	GCTGCAGAGTAAGTAC-1_contig_1	TRUE	552	TRA	TRAV12-2*01	None	TRAJ30*01	TRAC*01	TRUE	TRUE	CAVNRVNRDDKIIF	TGTGCCGTGAACAGAGTGAACAGAGATGACAAGATCATCTTT	8481	4	clonotype1445	clonotype1445_consensus_2	single TCR
GCTGCAGAGTAAGTAC-1	TRUE	GCTGCAGAGTAAGTAC-1_contig_2	TRUE	512	TRB	TRBV7-8*01	None	TRBJ2-6*01	TRBC2*01	TRUE	TRUE	CASSHSSGANVLTF	TGTGCCAGCAGCCATAGTTCTGGGGCCAACGTCCTGACTTTC	3681	1	clonotype1445	clonotype1445_consensus_1	single TCR
GCTGCAGAGTCTCAAC-1	TRUE	GCTGCAGAGTCTCAAC-1_contig_1	TRUE	849	TRB	TRBV19*01	TRBD1*01	TRBJ1-5*01	TRBC1*01	TRUE	TRUE	CASRTGSGEPQHF	TGTGCCAGTAGGACAGGGTCGGGGGAGCCCCAGCATTTT	15621	7	clonotype1446	clonotype1446_consensus_1	single TCR
GCTGCAGAGTCTCAAC-1	TRUE	GCTGCAGAGTCTCAAC-1_contig_4	TRUE	531	TRA	TRAV1-2*01	None	TRAJ16*01	TRAC*01	TRUE	TRUE	CDGQKLLF	TGTGATGGCCAGAAGCTGCTCTTT	3650	1	clonotype1446	clonotype1446_consensus_2	single TCR
GCTGCAGCAGATGGGT-1	TRUE	GCTGCAGCAGATGGGT-1_contig_1	TRUE	699	TRB	TRBV20-1*02	TRBD1*01	TRBJ2-3*01	TRBC2*01	TRUE	TRUE	CSAPGQRTDTQYF	TGCAGTGCCCCAGGACAGCGCACAGATACGCAGTATTTT	25761	10	clonotype1448	clonotype1448_consensus_1	single TCR
GCTGCAGCAGATGGGT-1	TRUE	GCTGCAGCAGATGGGT-1_contig_2	TRUE	588	TRA	TRAV17*01	None	TRAJ49*01	TRAC*01	TRUE	TRUE	CATDGNQFYF	TGTGCTACGGACGGTAACCAGTTCTATTTT	5651	3	clonotype1448	clonotype1448_consensus_2	single TCR
GCTGCAGTCAACACTG-1	TRUE	GCTGCAGTCAACACTG-1_contig_1	TRUE	713	TRB	TRBV6-5*01	TRBD2*02	TRBJ1-2*01	TRBC1*01	TRUE	TRUE	CASSYGGGGAYGYTF	TGTGCCAGCAGTTACGGGGGTGGAGGGGCCTATGGCTACACCTTC	27267	9	clonotype1449	clonotype1449_consensus_2	single TCR
GCTGCAGTCAACACTG-1	TRUE	GCTGCAGTCAACACTG-1_contig_4	TRUE	650	TRA	TRAV12-3*01	None	TRAJ54*01	TRAC*01	TRUE	TRUE	CAMSPVQGAQKLVF	TGTGCAATGAGTCCTGTTCAGGGAGCCCAGAAGCTGGTATTT	6053	3	clonotype1449	clonotype1449_consensus_1	single TCR
GCTGCAGTCAGAAATG-1	TRUE	GCTGCAGTCAGAAATG-1_contig_1	TRUE	544	TRA	TRAV10*01	None	TRAJ31*01	TRAC*01	TRUE	TRUE	CVVREPNNNARLMF	TGTGTGGTGCGAGAACCCAATAACAATGCCAGACTCATGTTT	7774	2	clonotype1450	clonotype1450_consensus_1	single TCR
GCTGCAGTCAGAAATG-1	TRUE	GCTGCAGTCAGAAATG-1_contig_2	TRUE	515	TRB	TRBV12-4*01	TRBD1*01	TRBJ2-7*01	TRBC2*01	TRUE	TRUE	CASSSSGTGYHEQYF	TGTGCCAGCAGTTCCTCCGGGACAGGGTACCACGAGCAGTACTTC	6861	2	clonotype1450	clonotype1450_consensus_2	single TCR
GCTGCAGTCCAGGGCT-1	TRUE	GCTGCAGTCCAGGGCT-1_contig_1	TRUE	829	TRB	TRBV30*01	None	TRBJ1-1*01	TRBC1*01	TRUE	TRUE	CAWSLERRNTEAFF	TGTGCCTGGAGTCTCGAACGGAGGAACACTGAAGCTTTCTTT	11397	6	clonotype1452	clonotype1452_consensus_1	single TCR
GCTGCAGTCCAGGGCT-1	TRUE	GCTGCAGTCCAGGGCT-1_contig_2	TRUE	970	TRA	TRAV1-2*01	None	TRAJ6*01	TRAC*01	TRUE	TRUE	CAVRVASGGSYIPTF	TGTGCTGTGAGAGTTGCATCAGGAGGAAGCTACATACCTACATTT	3334	2	clonotype1452	clonotype1452_consensus_2	single TCR
GCTGCGAGTAGGACAC-1	TRUE	GCTGCGAGTAGGACAC-1_contig_1	TRUE	695	TRB	TRBV4-1*01	None	TRBJ1-1*01	TRBC1*01	TRUE	TRUE	CASRSTLEAFF	TGCGCCAGCCGATCGACACTTGAAGCTTTCTTT	37598	12	clonotype1456	clonotype1456_consensus_2	single TCR
GCTGCGAGTAGGACAC-1	TRUE	GCTGCGAGTAGGACAC-1_contig_2	TRUE	532	TRA	TRAV1-2*01	None	TRAJ16*01	TRAC*01	TRUE	TRUE	CAVRGRDGQKLLF	TGTGCTGTGAGGGGAAGAGATGGCCAGAAGCTGCTCTTT	11237	3	clonotype1456	clonotype1456_consensus_1	single TCR
GCTGCGATCTCCTATA-1	TRUE	GCTGCGATCTCCTATA-1_contig_1	TRUE	687	TRB	TRBV3-1*01	TRBD1*01	TRBJ2-7*01	TRBC2*01	TRUE	TRUE	CASSQKGVYEQYF	TGTGCCAGCAGCCAAAAGGGGGTATACGAGCAGTACTTC	9561	3	clonotype1457	clonotype1457_consensus_2	single TCR
GCTGCGATCTCCTATA-1	TRUE	GCTGCGATCTCCTATA-1_contig_2	TRUE	583	TRA	TRAV8-1*01	None	TRAJ9*01	TRAC*01	TRUE	TRUE	CAVIPNTGGFKTIF	TGTGCCGTGATCCCCAATACTGGAGGCTTCAAAACTATCTTT	4176	2	clonotype1457	clonotype1457_consensus_1	single TCR
GCTGCTTAGTTATCGC-1	TRUE	GCTGCTTAGTTATCGC-1_contig_1	TRUE	765	TRB	TRBV7-9*03	TRBD2*01	TRBJ2-5*01	TRBC2*01	TRUE	TRUE	CASSPQAGSLETQYF	TGTGCCAGCAGCCCACAGGCGGGGAGTTTAGAGACCCAGTACTTC	13683	4	clonotype1459	clonotype1459_consensus_2	single TCR
GCTGCTTAGTTATCGC-1	TRUE	GCTGCTTAGTTATCGC-1_contig_4	TRUE	475	TRA	TRAV26-1*01	None	TRAJ42*01	TRAC*01	TRUE	TRUE	CIVRVAEGGSQGNLIF	TGCATCGTCAGAGTCGCGGAGGGAGGAAGCCAAGGAAATCTCATCTTT	2947	1	clonotype1459	clonotype1459_consensus_1	single TCR
GCTGCTTGTTCAGGCC-1	TRUE	GCTGCTTGTTCAGGCC-1_contig_1	TRUE	704	TRB	TRBV20-1*02	TRBD2*02	TRBJ2-1*01	TRBC2*01	TRUE	TRUE	CSARAESANEQFF	TGCAGTGCTAGAGCGGAGAGTGCCAATGAGCAGTTCTTC	12835	4	clonotype1462	clonotype1462_consensus_2	single TCR
GCTGCTTGTTCAGGCC-1	TRUE	GCTGCTTGTTCAGGCC-1_contig_2	TRUE	676	TRA	TRAV8-4*01	None	TRAJ39*01	TRAC*01	TRUE	TRUE	CAVSDLGNAGNMLTF	TGTGCTGTGAGTGATCTTGGGAATGCAGGCAACATGCTCACCTTT	4134	2	clonotype1462	clonotype1462_consensus_1	single TCR
GCTGGGTAGATGGGTC-1	TRUE	GCTGGGTAGATGGGTC-1_contig_1	TRUE	916	TRB	TRBV28*01	TRBD1*01	TRBJ1-3*01	TRBC1*01	TRUE	TRUE	CASSTPPGQGGLSGNTIYF	TGTGCCAGCAGTACCCCCCCGGGACAGGGGGGCCTCTCTGGAAACACCATATATTTT	7104	3	clonotype1465	clonotype1465_consensus_2	single TCR
GCTGGGTAGATGGGTC-1	TRUE	GCTGGGTAGATGGGTC-1_contig_5	TRUE	584	TRA	TRAV12-1*01	None	TRAJ6*01	TRAC*01	TRUE	TRUE	CVVKPLTGGSYIPTF	TGTGTGGTGAAACCCCTTACAGGAGGAAGCTACATACCTACATTT	3225	1	clonotype1465	clonotype1465_consensus_1	single TCR
GCTGGGTCAGGCAGTA-1	TRUE	GCTGGGTCAGGCAGTA-1_contig_1	TRUE	513	TRA	TRAV20*01	None	TRAJ32*02	TRAC*01	TRUE	TRUE	CAVLYGGATNKLIF	TGTGCTGTGCTTTATGGTGGTGCTACAAACAAGCTCATCTTT	4166	1	clonotype1467	clonotype1467_consensus_1	single TCR
GCTGGGTCAGGCAGTA-1	TRUE	GCTGGGTCAGGCAGTA-1_contig_2	TRUE	738	TRB	TRBV3-1*01	TRBD1*01	TRBJ1-6*01	TRBC1*01	TRUE	TRUE	CASSPGTAYNSPLHF	TGTGCCAGCAGCCCCGGGACCGCCTATAATTCACCCCTCCACTTT	6024	2	clonotype1467	clonotype1467_consensus_2	single TCR
GCTGGGTGTCATCCCT-1	TRUE	GCTGGGTGTCATCCCT-1_contig_1	TRUE	706	TRB	TRBV7-9*01	TRBD1*01	TRBJ2-5*01	TRBC2*01	TRUE	TRUE	CASSLFARAGGETQYF	TGTGCCAGCAGCTTGTTTGCCCGTGCAGGGGGAGAGACCCAGTACTTC	19790	7	clonotype1469	clonotype1469_consensus_1	single TCR
GCTGGGTGTCATCCCT-1	TRUE	GCTGGGTGTCATCCCT-1_contig_2	TRUE	645	TRA	TRAV12-1*01	None	TRAJ23*01	TRAC*01	TRUE	TRUE	CVVSSYNQGGKLIF	TGTGTGGTGAGTTCTTATAACCAGGGAGGAAAGCTTATCTTC	6444	2	clonotype1469	clonotype1469_consensus_2	single TCR
GCTGGGTGTCGGGTCT-1	TRUE	GCTGGGTGTCGGGTCT-1_contig_1	TRUE	443	TRA	TRAV4*01	None	TRAJ5*01	TRAC*01	TRUE	TRUE	CLVGEGTGRRALTF	TGCCTCGTGGGTGAAGGGACGGGCAGGAGAGCACTTACTTTT	4405	1	clonotype1470	clonotype1470_consensus_1	single TCR
GCTGGGTGTCGGGTCT-1	TRUE	GCTGGGTGTCGGGTCT-1_contig_2	TRUE	680	TRB	TRBV5-6*01	TRBD2*02	TRBJ2-7*01	TRBC2*01	TRUE	TRUE	CASSFMTGGGEQYF	TGTGCCAGCAGCTTTATGACGGGCGGAGGGGAGCAGTACTTC	3826	1	clonotype1470	clonotype1470_consensus_2	single TCR
GCTTCCACAGACGCAA-1	TRUE	GCTTCCACAGACGCAA-1_contig_2	TRUE	691	TRB	TRBV12-3*01	None	TRBJ1-4*01	TRBC1*01	TRUE	TRUE	CASSFSISDTNEKLFF	TGTGCCAGCAGCTTTTCTATTTCGGATACTAATGAAAAACTGTTTTTT	6126	2	clonotype1473	clonotype1473_consensus_1	single TCR
GCTTCCACAGACGCAA-1	TRUE	GCTTCCACAGACGCAA-1_contig_5	TRUE	450	TRA	TRAV21*01	None	TRAJ56*01	TRAC*01	TRUE	TRUE	CAGTGANSKLTF	TGTGCTGGGACTGGAGCCAATAGTAAGCTGACATTT	4253	1	clonotype1473	clonotype1473_consensus_2	single TCR
GCTTCCACAGGTGGAT-1	TRUE	GCTTCCACAGGTGGAT-1_contig_1	TRUE	1044	TRB	TRBV13*01	TRBD1*01	TRBJ2-1*01	TRBC2*01	TRUE	TRUE	CASSTDSNYNEQFF	TGTGCCAGCAGCACGGACAGTAACTACAATGAGCAGTTCTTC	10284	6	clonotype1474	clonotype1474_consensus_2	single TCR
GCTTCCACAGGTGGAT-1	TRUE	GCTTCCACAGGTGGAT-1_contig_3	TRUE	568	TRA	TRAV22*01	None	TRAJ37*01	TRAC*01	TRUE	TRUE	CAAVSGNTGKLIF	TGTGCTGCCGTCTCTGGCAACACAGGCAAACTAATCTTT	2662	1	clonotype1474	clonotype1474_consensus_1	single TCR
GCTTCCAGTCACTTCC-1	TRUE	GCTTCCAGTCACTTCC-1_contig_1	TRUE	579	TRB	TRBV30*01	TRBD1*01	TRBJ1-5*01	TRBC1*01	TRUE	TRUE	CAWSEGTVNQPQHF	TGTGCCTGGAGTGAGGGGACGGTCAATCAGCCCCAGCATTTT	12022	4	clonotype1475	clonotype1475_consensus_1	single TCR
GCTTCCAGTCACTTCC-1	TRUE	GCTTCCAGTCACTTCC-1_contig_2	TRUE	548	TRA	TRAV5*01	None	TRAJ11*01	TRAC*01	TRUE	TRUE	CAGTGYSTLTF	TGTGCAGGAACAGGATACAGCACCCTCACCTTT	3441	1	clonotype1475	clonotype1475_consensus_2	single TCR
GCTTCCATCACGCATA-1	TRUE	GCTTCCATCACGCATA-1_contig_1	TRUE	515	TRA	TRAV13-1*01	None	TRAJ4*01	TRAC*01	TRUE	TRUE	CAASTFSGGYNKLIF	TGTGCAGCAAGTACTTTTTCTGGTGGCTACAATAAGCTGATTTTT	3883	1	clonotype1476	clonotype1476_consensus_1	single TCR
GCTTCCATCACGCATA-1	TRUE	GCTTCCATCACGCATA-1_contig_2	TRUE	686	TRB	TRBV11-2*03	TRBD1*01	TRBJ1-4*01	TRBC1*01	TRUE	TRUE	CASSVTGLEKLFF	TGTGCCAGCAGCGTAACAGGGCTTGAAAAACTGTTTTTT	9098	5	clonotype1476	clonotype1476_consensus_2	single TCR
GCTTGAATCTCCGGTT-1	TRUE	GCTTGAATCTCCGGTT-1_contig_1	TRUE	579	TRA	TRAV13-2*01	None	TRAJ40*01	TRAC*01	TRUE	TRUE	CAENEPGTYKYIF	TGTGCAGAGAATGAACCAGGAACCTACAAATACATCTTT	2370	2	clonotype1479	clonotype1479_consensus_1	single TCR
GCTTGAATCTCCGGTT-1	TRUE	GCTTGAATCTCCGGTT-1_contig_2	TRUE	725	TRB	TRBV7-9*03	None	TRBJ1-1*01	TRBC1*01	TRUE	TRUE	CASSLATEAFF	TGTGCCAGCAGCTTAGCCACTGAAGCTTTCTTT	26031	11	clonotype1479	clonotype1479_consensus_2	single TCR
GGAAAGCTCCCTAATT-1	TRUE	GGAAAGCTCCCTAATT-1_contig_2	TRUE	713	TRB	TRBV6-1*01	TRBD1*01	TRBJ1-5*01	TRBC1*01	TRUE	TRUE	CASTRLPKLSTEQDFSNQPQHF	TGTGCCAGCACCCGACTTCCGAAGTTATCTACCGAACAGGACTTCAGCAATCAGCCCCAGCATTTT	3486	1	clonotype1486	clonotype1486_consensus_1	single TCR
GGAAAGCTCCCTAATT-1	TRUE	GGAAAGCTCCCTAATT-1_contig_3	TRUE	695	TRA	TRAV8-2*01	None	TRAJ22*01	TRAC*01	TRUE	TRUE	CVVSDIGSARQLTF	TGTGTTGTGAGTGATATAGGTTCTGCAAGGCAACTGACCTTT	1829	1	clonotype1486	clonotype1486_consensus_2	single TCR
GGAACTTAGCTGATAA-1	TRUE	GGAACTTAGCTGATAA-1_contig_1	TRUE	669	TRB	TRBV7-8*01	TRBD1*01	TRBJ2-5*01	TRBC2*01	TRUE	TRUE	CASSSLGQAIQYF	TGTGCCAGCAGCAGTCTGGGACAGGCAATTCAGTACTTC	12910	4	clonotype1487	clonotype1487_consensus_1	single TCR
GGAACTTAGCTGATAA-1	TRUE	GGAACTTAGCTGATAA-1_contig_3	TRUE	513	TRA	TRAV16*01	None	TRAJ4*01	TRAC*01	TRUE	TRUE	CARNSGGYNKLIF	TGTGCTCGGAATTCTGGTGGCTACAATAAGCTGATTTTT	3276	1	clonotype1487	clonotype1487_consensus_2	single TCR
GGAACTTAGGAATGGA-1	TRUE	GGAACTTAGGAATGGA-1_contig_1	TRUE	529	TRA	TRAV27*01	None	TRAJ48*01	TRAC*01	TRUE	TRUE	CAGSFGNEKLTF	TGTGCAGGATCCTTTGGAAATGAGAAATTAACCTTT	3867	1	clonotype1488	clonotype1488_consensus_1	single TCR
GGAACTTAGGAATGGA-1	TRUE	GGAACTTAGGAATGGA-1_contig_2	TRUE	669	TRB	TRBV7-2*01	TRBD1*01	TRBJ1-6*02	TRBC1*01	TRUE	TRUE	CASSLWGRTTSPLHF	TGTGCCAGCAGCTTGTGGGGCCGGACCACATCACCCCTCCACTTT	1194	1	clonotype1488	clonotype1488_consensus_2	single TCR
GGAACTTCAAAGGAAG-1	TRUE	GGAACTTCAAAGGAAG-1_contig_1	TRUE	672	TRB	TRBV2*01	TRBD1*01	TRBJ2-1*01	TRBC2*01	TRUE	TRUE	CASSDNWNEQFF	TGTGCCAGCAGTGATAACTGGAATGAGCAGTTCTTC	9379	5	clonotype1489	clonotype1489_consensus_2	single TCR
GGAACTTCAAAGGAAG-1	TRUE	GGAACTTCAAAGGAAG-1_contig_2	TRUE	507	TRA	TRAV13-1*01	None	TRAJ44*01	TRAC*01	TRUE	TRUE	CAARTGTASKLTF	TGTGCAGCAAGAACCGGCACTGCCAGTAAACTCACCTTT	2593	1	clonotype1489	clonotype1489_consensus_1	single TCR
GGAACTTCATTGAGCT-1	TRUE	GGAACTTCATTGAGCT-1_contig_2	TRUE	681	TRB	TRBV9*02	TRBD2*01	TRBJ2-3*01	TRBC1*01	TRUE	TRUE	CASSVYSTSGTDTQYF	TGTGCCAGCAGCGTTTATTCGACTAGCGGCACAGATACGCAGTATTTT	3656	1	clonotype1490	clonotype1490_consensus_1	single TCR
GGAACTTCATTGAGCT-1	TRUE	GGAACTTCATTGAGCT-1_contig_3	TRUE	694	TRA	TRAV8-4*01	None	TRAJ49*01	TRAC*01	TRUE	TRUE	CAVSEPGNQFYF	TGTGCTGTGAGTGAGCCCGGTAACCAGTTCTATTTT	224	1	clonotype1490	clonotype1490_consensus_2	single TCR
GGAACTTCATTGTGCA-1	TRUE	GGAACTTCATTGTGCA-1_contig_1	TRUE	659	TRB	TRBV5-1*01	TRBD1*01	TRBJ2-5*01	TRBC2*01	TRUE	TRUE	CASRLQGVQETQYF	TGCGCCAGCAGACTACAGGGGGTTCAAGAGACCCAGTACTTC	17938	5	clonotype1491	clonotype1491_consensus_1	single TCR
GGAACTTCATTGTGCA-1	TRUE	GGAACTTCATTGTGCA-1_contig_2	TRUE	564	TRA	TRAV36/DV7*01	None	TRAJ49*01	TRAC*01	TRUE	TRUE	CAVGRNTGNQFYF	TGTGCTGTGGGCAGGAACACCGGTAACCAGTTCTATTTT	3645	1	clonotype1491	clonotype1491_consensus_2	single TCR
GGAACTTGTATGCTTG-1	TRUE	GGAACTTGTATGCTTG-1_contig_1	TRUE	728	TRB	TRBV7-9*01	TRBD2*01	TRBJ1-1*01	TRBC1*01	TRUE	TRUE	CASSSAGGTEAFF	TGTGCCAGCAGCTCAGCGGGGGGGACTGAAGCTTTCTTT	31885	10	clonotype1493	clonotype1493_consensus_1	single TCR
GGAACTTGTATGCTTG-1	TRUE	GGAACTTGTATGCTTG-1_contig_2	TRUE	510	TRA	TRAV6*01	None	TRAJ6*01	TRAC*01	TRUE	TRUE	CALDPSGGSYIPTF	TGTGCTCTAGACCCATCAGGAGGAAGCTACATACCTACATTT	2687	1	clonotype1493	clonotype1493_consensus_2	single TCR
GGAACTTGTTACAGAA-1	TRUE	GGAACTTGTTACAGAA-1_contig_1	TRUE	687	TRB	TRBV15*01	TRBD2*02	TRBJ2-7*01	TRBC2*01	TRUE	TRUE	CATSRDRGGRAYEQYF	TGTGCCACCAGCAGAGATCGTGGCGGGAGGGCCTACGAGCAGTACTTC	7436	3	clonotype1494	clonotype1494_consensus_2	single TCR
GGAACTTGTTACAGAA-1	TRUE	GGAACTTGTTACAGAA-1_contig_3	TRUE	596	TRA	TRAV25*01	None	TRAJ42*01	TRAC*01	TRUE	TRUE	CASPSEGGSQGNLIF	TGTGCATCCCCCTCGGAGGGAGGAAGCCAAGGAAATCTCATCTTT	1553	1	clonotype1494	clonotype1494_consensus_1	single TCR
GGAACTTTCTGTTGAG-1	TRUE	GGAACTTTCTGTTGAG-1_contig_1	TRUE	508	TRA	TRAV17*01	None	TRAJ24*02	TRAC*01	TRUE	TRUE	CAKTTTDSWGKLQF	TGTGCTAAGACGACAACTGACAGCTGGGGGAAATTGCAGTTT	4068	1	clonotype1495	clonotype1495_consensus_1	single TCR
GGAACTTTCTGTTGAG-1	TRUE	GGAACTTTCTGTTGAG-1_contig_2	TRUE	821	TRB	TRBV19*01	None	TRBJ1-5*01	TRBC1*01	TRUE	TRUE	CASSIAPGSSSSQPQHF	TGTGCCAGTAGTATAGCCCCAGGTTCAAGCTCGAGTCAGCCCCAGCATTTT	2525	1	clonotype1495	clonotype1495_consensus_2	single TCR
GGAACTTTCTGTTTGT-1	TRUE	GGAACTTTCTGTTTGT-1_contig_1	TRUE	714	TRB	TRBV14*01	TRBD1*01	TRBJ1-2*01	TRBC1*01	TRUE	TRUE	CASSRTRDRVGYTF	TGTGCCAGCAGCCGAACCCGGGACAGGGTAGGCTACACCTTC	13555	7	clonotype1496	clonotype1496_consensus_2	single TCR
GGAACTTTCTGTTTGT-1	TRUE	GGAACTTTCTGTTTGT-1_contig_3	TRUE	872	TRA	TRAV8-3*01	None	TRAJ39*01	TRAC*01	TRUE	TRUE	CAVGAMINAGNMLTF	TGTGCTGTGGGTGCGATGATTAATGCAGGCAACATGCTCACCTTT	7073	3	clonotype1496	clonotype1496_consensus_1	single TCR
GGAATAAGTGTATGGG-1	TRUE	GGAATAAGTGTATGGG-1_contig_1	TRUE	667	TRB	TRBV4-1*01	TRBD1*01	TRBJ1-2*01	TRBC1*01	TRUE	TRUE	CASSQDRGAATNYGYTF	TGCGCCAGCAGCCAAGATCGAGGGGCAGCAACCAACTATGGCTACACCTTC	5490	5	clonotype1499	clonotype1499_consensus_1	single TCR
GGAATAAGTGTATGGG-1	TRUE	GGAATAAGTGTATGGG-1_contig_3	TRUE	648	TRA	TRAV8-6*02	None	TRAJ45*01	TRAC*01	TRUE	TRUE	CAVYSTNSGGGADGLTF	TGTGCTGTGTACTCGACCAATTCAGGAGGAGGTGCTGACGGACTCACCTTT	2946	1	clonotype1499	clonotype1499_consensus_2	single TCR
GGACAAGAGTGTCCCG-1	TRUE	GGACAAGAGTGTCCCG-1_contig_1	TRUE	470	TRB	TRBV28*01	TRBD2*01	TRBJ1-2*01	TRBC1*01	TRUE	TRUE	CASTGGTLSNYGYTF	TGTGCCAGCACGGGGGGAACGCTGTCTAACTATGGCTACACCTTC	2734	1	clonotype1500	clonotype1500_consensus_1	single TCR
GGACAAGAGTGTCCCG-1	TRUE	GGACAAGAGTGTCCCG-1_contig_2	TRUE	583	TRA	TRAV29/DV5*01	None	TRAJ56*01	TRAC*01	TRUE	TRUE	CAAREGTGANSKLTF	TGTGCAGCAAGGGAGGGCACTGGAGCCAATAGTAAGCTGACATTT	7121	2	clonotype1500	clonotype1500_consensus_2	single TCR
GGACAAGTCTTCATGT-1	TRUE	GGACAAGTCTTCATGT-1_contig_1	TRUE	686	TRB	TRBV7-2*01	TRBD2*01	TRBJ2-7*01	TRBC2*01	TRUE	TRUE	CASAVAGSYPVYEQYF	TGTGCCAGCGCCGTGGCGGGGTCTTACCCGGTCTACGAGCAGTACTTC	28180	9	clonotype1502	clonotype1502_consensus_2	single TCR
GGACAAGTCTTCATGT-1	TRUE	GGACAAGTCTTCATGT-1_contig_3	TRUE	560	TRA	TRAV17*01	None	TRAJ36*01	TRAC*01	TRUE	TRUE	CATAQQTGANNLFF	TGTGCTACGGCCCAACAAACTGGGGCAAACAACCTCTTCTTT	3045	1	clonotype1502	clonotype1502_consensus_1	single TCR
GGACAGAAGGTGTTAA-1	TRUE	GGACAGAAGGTGTTAA-1_contig_1	TRUE	521	TRB	TRBV7-9*01	TRBD2*01	TRBJ2-1*01	TRBC2*01	TRUE	TRUE	CASSLGPLAGNNEQFF	TGTGCCAGCAGCTTAGGACCACTAGCGGGGAACAATGAGCAGTTCTTC	4464	2	clonotype1503	clonotype1503_consensus_1	single TCR
GGACAGAAGGTGTTAA-1	TRUE	GGACAGAAGGTGTTAA-1_contig_2	TRUE	504	TRA	TRAV10*01	None	TRAJ45*01	TRAC*01	TRUE	TRUE	CVVTPSGGGADGLTF	TGTGTGGTGACCCCGTCAGGAGGAGGTGCTGACGGACTCACCTTT	4234	1	clonotype1503	clonotype1503_consensus_2	single TCR
GGACAGACAACACCTA-1	TRUE	GGACAGACAACACCTA-1_contig_1	TRUE	496	TRA	TRAV38-2/DV8*01	None	TRAJ44*01	TRAC*01	TRUE	TRUE	CAYRDNTGTASKLTF	TGTGCTTATAGGGACAATACCGGCACTGCCAGTAAACTCACCTTT	3776	1	clonotype1504	clonotype1504_consensus_2	single TCR
GGACAGACAACACCTA-1	TRUE	GGACAGACAACACCTA-1_contig_2	TRUE	665	TRB	TRBV5-1*01	TRBD1*01	TRBJ1-1*01	TRBC1*01	TRUE	TRUE	CASSPGQSNTEAFF	TGCGCCAGCAGCCCGGGACAGTCGAACACTGAAGCTTTCTTT	10794	4	clonotype1504	clonotype1504_consensus_1	single TCR
GGACATTAGAGCTGGT-1	TRUE	GGACATTAGAGCTGGT-1_contig_1	TRUE	707	TRB	TRBV27*01	TRBD2*02	TRBJ1-5*01	TRBC1*01	TRUE	TRUE	CASSPGRGGAFYQPQHF	TGTGCCAGCAGTCCCGGGAGGGGAGGGGCCTTCTATCAGCCCCAGCATTTT	34344	11	clonotype1507	clonotype1507_consensus_2	single TCR
GGACATTAGAGCTGGT-1	TRUE	GGACATTAGAGCTGGT-1_contig_5	TRUE	493	TRA	TRAV30*01	None	TRAJ28*01	TRAC*01	TRUE	TRUE	CGTEPLLDSGAGSYQLTF	TGTGGCACAGAGCCGCTGTTGGACTCTGGGGCTGGGAGTTACCAACTCACTTTC	1128	1	clonotype1507	clonotype1507_consensus_1	single TCR
GGACATTGTGATGTCT-1	TRUE	GGACATTGTGATGTCT-1_contig_1	TRUE	693	TRB	TRBV11-2*01	TRBD2*02	TRBJ1-5*01	TRBC1*01	TRUE	TRUE	CASSLAGNSNQPQHF	TGTGCCAGCAGCTTAGCGGGAAATAGCAATCAGCCCCAGCATTTT	6373	2	clonotype1510	clonotype1510_consensus_1	single TCR
GGACATTGTGATGTCT-1	TRUE	GGACATTGTGATGTCT-1_contig_3	TRUE	706	TRA	TRAV8-4*01	None	TRAJ36*01	TRAC*01	TRUE	TRUE	CAVRGPMGGANNLFF	TGTGCTGTGAGAGGGCCGATGGGTGGGGCAAACAACCTCTTCTTT	5489	2	clonotype1510	clonotype1510_consensus_2	single TCR
GGACGTCAGGATTCGG-1	TRUE	GGACGTCAGGATTCGG-1_contig_1	TRUE	477	TRA	TRAV5*01	None	TRAJ42*01	TRAC*01	TRUE	TRUE	CAEDYGGSQGNLIF	TGTGCAGAGGATTATGGAGGAAGCCAAGGAAATCTCATCTTT	2641	1	clonotype1514	clonotype1514_consensus_1	single TCR
GGACGTCAGGATTCGG-1	TRUE	GGACGTCAGGATTCGG-1_contig_2	TRUE	744	TRB	TRBV18*01	TRBD1*01	TRBJ2-7*01	TRBC2*01	TRUE	TRUE	CASSPLPGTLSYEQYF	TGTGCCAGCTCACCACTTCCCGGGACCCTCTCCTACGAGCAGTACTTC	12773	4	clonotype1514	clonotype1514_consensus_2	single TCR
GGACGTCCAATCCGAT-1	TRUE	GGACGTCCAATCCGAT-1_contig_1	TRUE	563	TRA	TRAV22*01	None	TRAJ27*01	TRAC*01	TRUE	TRUE	CAVPNAGKSTF	TGTGCTGTGCCCAATGCAGGCAAATCAACCTTT	7175	2	clonotype1516	clonotype1516_consensus_1	single TCR
GGACGTCCAATCCGAT-1	TRUE	GGACGTCCAATCCGAT-1_contig_3	TRUE	699	TRB	TRBV20-1*02	TRBD2*02	TRBJ2-7*01	TRBC2*01	TRUE	TRUE	CSARASGSNEQYF	TGCAGTGCTAGAGCTAGCGGGAGCAACGAGCAGTACTTC	1975	1	clonotype1516	clonotype1516_consensus_2	single TCR
GGAGCAAAGGTACTCT-1	TRUE	GGAGCAAAGGTACTCT-1_contig_1	TRUE	557	TRB	TRBV28*01	TRBD1*01	TRBJ1-5*01	TRBC1*01	TRUE	TRUE	CASSARDRPYQPQHF	TGTGCCAGCAGTGCCCGGGACCGCCCTTATCAGCCCCAGCATTTT	7344	2	clonotype1520	clonotype1520_consensus_2	single TCR
GGAGCAAAGGTACTCT-1	TRUE	GGAGCAAAGGTACTCT-1_contig_2	TRUE	450	TRA	TRAV9-2*01	None	TRAJ41*01	TRAC*01	TRUE	TRUE	CASFSNSGYALNF	TGTGCTTCCTTCTCAAATTCCGGGTATGCACTCAACTTC	4976	1	clonotype1520	clonotype1520_consensus_1	single TCR
GGAGCAAGTAGCCTCG-1	TRUE	GGAGCAAGTAGCCTCG-1_contig_1	TRUE	522	TRA	TRAV27*01	None	TRAJ40*01	TRAC*01	TRUE	TRUE	CAGGTYKYIF	TGTGCAGGAGGAACCTACAAATACATCTTT	4651	1	clonotype1522	clonotype1522_consensus_1	single TCR
GGAGCAAGTAGCCTCG-1	TRUE	GGAGCAAGTAGCCTCG-1_contig_2	TRUE	705	TRB	TRBV11-2*01	TRBD2*02	TRBJ2-3*01	TRBC2*01	TRUE	TRUE	CASSLDGRPSGSWKDTQYF	TGTGCCAGCAGCTTAGATGGGAGGCCTAGCGGGAGTTGGAAAGATACGCAGTATTTT	14716	5	clonotype1522	clonotype1522_consensus_2	single TCR
GGAGCAAGTCGATTGT-1	TRUE	GGAGCAAGTCGATTGT-1_contig_1	TRUE	693	TRB	TRBV20-1*02	TRBD1*01	TRBJ2-7*01	TRBC2*01	TRUE	TRUE	CSASSGKVFEQYF	TGCAGTGCTAGCTCAGGGAAGGTCTTCGAGCAGTACTTC	27514	11	clonotype1523	clonotype1523_consensus_2	single TCR
GGAGCAAGTCGATTGT-1	TRUE	GGAGCAAGTCGATTGT-1_contig_3	TRUE	459	TRA	TRAV9-2*01	None	TRAJ4*01	TRAC*01	TRUE	TRUE	CALSLMFSGGYNKLIF	TGTGCTCTGAGCCTCATGTTTTCTGGTGGCTACAATAAGCTGATTTTT	1324	1	clonotype1523	clonotype1523_consensus_1	single TCR
GGAGCAATCTTTAGTC-1	TRUE	GGAGCAATCTTTAGTC-1_contig_1	TRUE	721	TRB	TRBV16*01	TRBD2*01	TRBJ2-1*01	TRBC2*01	TRUE	TRUE	CASSQSLLAGVVVEQFF	TGTGCCAGCAGCCAATCGTTGCTAGCGGGGGTCGTAGTTGAGCAGTTCTTC	10707	3	clonotype1524	clonotype1524_consensus_2	single TCR
GGAGCAATCTTTAGTC-1	TRUE	GGAGCAATCTTTAGTC-1_contig_3	TRUE	551	TRA	TRAV26-1*01	None	TRAJ30*01	TRAC*01	TRUE	TRUE	CIVRGWNRDDKIIF	TGCATCGTCAGAGGATGGAACAGAGATGACAAGATCATCTTT	3168	1	clonotype1524	clonotype1524_consensus_1	single TCR
GGATGTTCAGCTCGAC-1	TRUE	GGATGTTCAGCTCGAC-1_contig_3	TRUE	700	TRB	TRBV11-3*01	TRBD2*01	TRBJ2-3*01	TRBC2*01	TRUE	TRUE	CASSLDPTISGDTQYF	TGTGCCAGCAGCTTAGACCCAACGATATCGGGAGATACGCAGTATTTT	2921	1	clonotype1526	clonotype1526_consensus_2	single TCR
GGATGTTCAGCTCGAC-1	TRUE	GGATGTTCAGCTCGAC-1_contig_5	TRUE	554	TRA	TRAV25*01	None	TRAJ34*01	TRAC*01	TRUE	TRUE	CAGPRGGTDKLIF	TGTGCAGGGCCGAGGGGGGGCACCGACAAGCTCATCTTT	3047	1	clonotype1526	clonotype1526_consensus_1	single TCR
GGATTACAGGATGGTC-1	TRUE	GGATTACAGGATGGTC-1_contig_1	TRUE	693	TRB	TRBV7-8*01	None	TRBJ2-5*01	TRBC2*01	TRUE	TRUE	CASSLVAQETQYF	TGTGCCAGCAGCTTAGTGGCTCAAGAGACCCAGTACTTC	30793	10	clonotype1528	clonotype1528_consensus_1	single TCR
GGATTACAGGATGGTC-1	TRUE	GGATTACAGGATGGTC-1_contig_3	TRUE	553	TRA	TRAV12-1*01	None	TRAJ27*01	TRAC*01	TRUE	TRUE	CVVKRSNAGKSTF	TGTGTGGTGAAAAGGTCCAATGCAGGCAAATCAACCTTT	7630	2	clonotype1528	clonotype1528_consensus_2	single TCR
GGATTACGTGACGCCT-1	TRUE	GGATTACGTGACGCCT-1_contig_1	TRUE	545	TRA	TRAV12-2*01	None	TRAJ33*01	TRAC*01	TRUE	TRUE	CAVTDSNYQLIW	TGTGCCGTGACGGACAGCAACTATCAGTTAATCTGG	3980	1	clonotype1530	clonotype1530_consensus_1	single TCR
GGATTACGTGACGCCT-1	TRUE	GGATTACGTGACGCCT-1_contig_4	TRUE	821	TRB	TRBV19*01	TRBD1*01	TRBJ1-1*01	TRBC1*01	TRUE	TRUE	CASSMGQANTEAFF	TGTGCCAGTAGTATGGGACAGGCAAACACTGAAGCTTTCTTT	5060	2	clonotype1530	clonotype1530_consensus_2	single TCR
GGCAATTAGTAGTGCG-1	TRUE	GGCAATTAGTAGTGCG-1_contig_1	TRUE	795	TRB	TRBV7-2*01	TRBD1*01	TRBJ2-7*01	TRBC2*01	TRUE	TRUE	CASSFRGGPTNEQYF	TGTGCCAGCAGCTTCCGAGGGGGGCCGACGAACGAGCAGTACTTC	41186	12	clonotype1532	clonotype1532_consensus_2	single TCR
GGCAATTAGTAGTGCG-1	TRUE	GGCAATTAGTAGTGCG-1_contig_2	TRUE	572	TRA	TRAV14/DV4*01	None	TRAJ36*01	TRAC*01	TRUE	TRUE	CAMRPDQTGANNLFF	TGTGCAATGAGGCCCGATCAAACTGGGGCAAACAACCTCTTCTTT	4201	2	clonotype1532	clonotype1532_consensus_1	single TCR
GGCAATTCAATCTGCA-1	TRUE	GGCAATTCAATCTGCA-1_contig_1	TRUE	725	TRB	TRBV7-2*01	None	TRBJ1-1*01	TRBC1*01	TRUE	TRUE	CASTPQAEAFF	TGTGCCAGCACCCCCCAGGCTGAAGCTTTCTTT	7396	2	clonotype1533	clonotype1533_consensus_1	single TCR
GGCAATTCAATCTGCA-1	TRUE	GGCAATTCAATCTGCA-1_contig_2	TRUE	553	TRA	TRAV12-2*01	None	TRAJ40*01	TRAC*01	TRUE	TRUE	CAVTGPSGTYKYIF	TGTGCCGTGACCGGGCCCTCAGGAACCTACAAATACATCTTT	3820	1	clonotype1533	clonotype1533_consensus_2	single TCR
GGCAATTTCGATAGAA-1	TRUE	GGCAATTTCGATAGAA-1_contig_1	TRUE	694	TRB	TRBV6-5*01	TRBD1*01	TRBJ1-6*02	TRBC1*01	TRUE	TRUE	CASSYSGRVHNSPLHF	TGTGCCAGCAGTTACTCGGGCAGGGTTCATAATTCACCCCTCCACTTT	10414	3	clonotype1535	clonotype1535_consensus_1	single TCR
GGCAATTTCGATAGAA-1	TRUE	GGCAATTTCGATAGAA-1_contig_2	TRUE	572	TRA	TRAV19*01	None	TRAJ45*01	TRAC*01	TRUE	TRUE	CALSEAGGGADGLTF	TGTGCTCTGAGTGAGGCAGGAGGAGGTGCTGACGGACTCACCTTT	3007	1	clonotype1535	clonotype1535_consensus_2	single TCR
GGCCGATTCTGCTTGC-1	TRUE	GGCCGATTCTGCTTGC-1_contig_1	TRUE	732	TRA	TRAV38-2/DV8*01	None	TRAJ43*01	TRAC*01	TRUE	TRUE	CAYRSAWDNNDMRF	TGTGCTTATAGGAGCGCGTGGGATAACAATGACATGCGCTTT	15558	5	clonotype1541	clonotype1541_consensus_1	single TCR
GGCCGATTCTGCTTGC-1	TRUE	GGCCGATTCTGCTTGC-1_contig_2	TRUE	475	TRB	TRBV27*01	None	TRBJ1-1*01	TRBC1*01	TRUE	TRUE	CASSPLTRNTEAFF	TGTGCCAGCAGTCCTCTTACTCGGAACACTGAAGCTTTCTTT	7550	3	clonotype1541	clonotype1541_consensus_2	single TCR
GGCGTGTTCAAACCAC-1	TRUE	GGCGTGTTCAAACCAC-1_contig_1	TRUE	687	TRB	TRBV11-2*03	None	TRBJ1-6*02	TRBC1*01	TRUE	TRUE	CASSLDFNSPLHF	TGTGCCAGCAGCTTAGATTTCAATTCACCCCTCCACTTT	40756	11	clonotype1547	clonotype1547_consensus_1	single TCR
GGCGTGTTCAAACCAC-1	TRUE	GGCGTGTTCAAACCAC-1_contig_3	TRUE	486	TRA	TRAV13-2*01	None	TRAJ13*02	TRAC*01	TRUE	TRUE	CADNSGGYQKVTF	TGTGCAGATAATTCTGGGGGTTACCAGAAAGTTACCTTT	2100	1	clonotype1547	clonotype1547_consensus_2	single TCR
GGCTGGTAGAAGAAGC-1	TRUE	GGCTGGTAGAAGAAGC-1_contig_1	TRUE	518	TRB	TRBV11-2*01	TRBD1*01	TRBJ2-1*01	TRBC2*01	TRUE	TRUE	CASSLFEGARGEQFF	TGTGCCAGCAGCTTATTTGAGGGGGCGCGCGGTGAGCAGTTCTTC	6337	2	clonotype1552	clonotype1552_consensus_2	single TCR
GGCTGGTAGAAGAAGC-1	TRUE	GGCTGGTAGAAGAAGC-1_contig_3	TRUE	430	TRA	TRAV9-2*01	None	TRAJ48*01	TRAC*01	TRUE	TRUE	CALSGRNFGNEKLTF	TGTGCTCTGAGTGGCCGTAACTTTGGAAATGAGAAATTAACCTTT	4016	1	clonotype1552	clonotype1552_consensus_1	single TCR
GGCTGGTGTTGTCTTT-1	TRUE	GGCTGGTGTTGTCTTT-1_contig_1	TRUE	503	TRA	TRAV9-2*01	None	TRAJ32*01	TRAC*01	TRUE	TRUE	CALTNYGGATNKLIF	TGTGCTCTGACTAATTATGGTGGTGCTACAAACAAGCTCATCTTT	7264	3	clonotype1554	clonotype1554_consensus_1	single TCR
GGCTGGTGTTGTCTTT-1	TRUE	GGCTGGTGTTGTCTTT-1_contig_3	TRUE	681	TRB	TRBV7-6*01	TRBD2*02	TRBJ2-7*01	TRBC2*01	TRUE	TRUE	CASSPGLAGEYEQYF	TGTGCCAGCAGCCCAGGACTAGCGGGAGAATACGAGCAGTACTTC	3943	3	clonotype1554	clonotype1554_consensus_2	single TCR
GGGAATGGTTCACGGC-1	TRUE	GGGAATGGTTCACGGC-1_contig_1	TRUE	530	TRA	TRAV21*01	None	TRAJ32*01	TRAC*01	TRUE	TRUE	CAPANYGGATNKLIF	TGTGCTCCCGCGAATTATGGTGGTGCTACAAACAAGCTCATCTTT	9218	2	clonotype1558	clonotype1558_consensus_2	single TCR
GGGAATGGTTCACGGC-1	TRUE	GGGAATGGTTCACGGC-1_contig_2	TRUE	681	TRB	TRBV11-2*03	TRBD1*01	TRBJ2-7*01	TRBC2*01	TRUE	TRUE	CASSTGYSYEQYF	TGTGCCAGCAGCACAGGGTACTCCTACGAGCAGTACTTC	12153	4	clonotype1558	clonotype1558_consensus_1	single TCR
GGGAATGTCTGACCTC-1	TRUE	GGGAATGTCTGACCTC-1_contig_1	TRUE	699	TRB	TRBV3-1*01	TRBD1*01	TRBJ2-2*01	TRBC2*01	TRUE	TRUE	CASSQRGRTGELFF	TGTGCCAGCAGCCAAAGGGGGCGAACCGGGGAGCTGTTTTTT	8844	3	clonotype1559	clonotype1559_consensus_2	single TCR
GGGAATGTCTGACCTC-1	TRUE	GGGAATGTCTGACCTC-1_contig_2	TRUE	799	TRA	TRAV8-3*01	None	TRAJ47*02	TRAC*01	TRUE	TRUE	CAVGAEEYGNKLVF	TGTGCTGTGGGTGCGGAGGAATATGGAAACAAGCTGGTCTTT	2275	1	clonotype1559	clonotype1559_consensus_1	single TCR
GGGACCTCACCTTGTC-1	TRUE	GGGACCTCACCTTGTC-1_contig_1	TRUE	765	TRA	TRAV29/DV5*01	None	TRAJ52*01	TRAC*01	TRUE	TRUE	CAAGGTSYGKLTF	TGTGCAGCCGGTGGTACTAGCTATGGAAAGCTGACATTT	13690	7	clonotype1560	clonotype1560_consensus_2	single TCR
GGGACCTCACCTTGTC-1	TRUE	GGGACCTCACCTTGTC-1_contig_2	TRUE	664	TRB	TRBV28*01	TRBD1*01	TRBJ2-3*01	TRBC1*01	TRUE	TRUE	CASSEQGPASTDTQYF	TGTGCCAGCAGTGAACAGGGTCCGGCTAGCACAGATACGCAGTATTTT	12497	4	clonotype1560	clonotype1560_consensus_1	single TCR
GGGACCTCAGCCTATA-1	TRUE	GGGACCTCAGCCTATA-1_contig_1	TRUE	456	TRA	TRAV9-2*01	None	TRAJ45*01	TRAC*01	TRUE	TRUE	CALTNSGGGADGLTF	TGTGCTCTTACTAATTCAGGAGGAGGTGCTGACGGACTCACCTTT	2572	1	clonotype1561	clonotype1561_consensus_2	single TCR
GGGACCTCAGCCTATA-1	TRUE	GGGACCTCAGCCTATA-1_contig_2	TRUE	846	TRB	TRBV11-2*03	TRBD2*01	TRBJ1-6*02	TRBC1*01	TRUE	TRUE	CASSLDGGNSPLHF	TGTGCCAGCAGCTTAGACGGGGGTAATTCACCCCTCCACTTT	15882	5	clonotype1561	clonotype1561_consensus_1	single TCR
GGGACCTCAGCGATCC-1	TRUE	GGGACCTCAGCGATCC-1_contig_1	TRUE	679	TRB	TRBV5-5*01	None	TRBJ2-5*01	TRBC2*01	TRUE	TRUE	CASNLRPETQYF	TGTGCCAGCAACCTTAGGCCAGAGACCCAGTACTTC	12137	4	clonotype1562	clonotype1562_consensus_1	single TCR
GGGACCTCAGCGATCC-1	TRUE	GGGACCTCAGCGATCC-1_contig_2	TRUE	508	TRA	TRAV4*01	None	TRAJ17*01	TRAC*01	TRUE	TRUE	CLVGEKAAGNKLTF	TGCCTCGTGGGTGAAAAGGCTGCAGGCAACAAGCTAACTTTT	9009	2	clonotype1562	clonotype1562_consensus_2	single TCR
GGGACCTGTAAGTGGC-1	TRUE	GGGACCTGTAAGTGGC-1_contig_1	TRUE	485	TRB	TRBV28*01	TRBD2*02	TRBJ2-1*01	TRBC2*01	TRUE	TRUE	CASSLGLAGAFYEQFF	TGTGCCAGCAGTTTGGGGCTAGCGGGAGCATTCTATGAGCAGTTCTTC	7227	2	clonotype1563	clonotype1563_consensus_2	single TCR
GGGACCTGTAAGTGGC-1	TRUE	GGGACCTGTAAGTGGC-1_contig_2	TRUE	516	TRA	TRAV29/DV5*01	None	TRAJ48*01	TRAC*01	TRUE	TRUE	CAASAGGNEKLTF	TGTGCAGCAAGCGCCGGAGGAAATGAGAAATTAACCTTT	13723	4	clonotype1563	clonotype1563_consensus_1	single TCR
GGGACCTGTTGCGTTA-1	TRUE	GGGACCTGTTGCGTTA-1_contig_1	TRUE	491	TRB	TRBV4-2*01	TRBD2*01	TRBJ2-5*01	TRBC2*01	TRUE	TRUE	CASSQDKGRVAETQYF	TGTGCCAGCAGCCAAGATAAAGGGCGGGTGGCGGAGACCCAGTACTTC	3428	2	clonotype1564	clonotype1564_consensus_2	single TCR
GGGACCTGTTGCGTTA-1	TRUE	GGGACCTGTTGCGTTA-1_contig_2	TRUE	517	TRA	TRAV12-3*01	None	TRAJ49*01	TRAC*01	TRUE	TRUE	CAMSGMDTGNQFYF	TGTGCAATGAGCGGGATGGACACCGGTAACCAGTTCTATTTT	3075	1	clonotype1564	clonotype1564_consensus_1	single TCR
GGGACCTTCCTAGGGC-1	TRUE	GGGACCTTCCTAGGGC-1_contig_1	TRUE	736	TRB	TRBV7-9*01	TRBD1*01	TRBJ2-7*01	TRBC2*01	TRUE	TRUE	CASSFTGISYEQYF	TGTGCCAGCAGCTTCACAGGGATCTCCTACGAGCAGTACTTC	42616	13	clonotype1565	clonotype1565_consensus_2	single TCR
GGGACCTTCCTAGGGC-1	TRUE	GGGACCTTCCTAGGGC-1_contig_3	TRUE	588	TRA	TRAV23/DV6*01	None	TRAJ31*01	TRAC*01	TRUE	TRUE	CAASRGNARLMF	TGTGCAGCAAGCAGGGGCAATGCCAGACTCATGTTT	3188	1	clonotype1565	clonotype1565_consensus_1	single TCR
GGGATGAGTAGCTGCC-1	TRUE	GGGATGAGTAGCTGCC-1_contig_1	TRUE	682	TRB	TRBV11-2*03	TRBD1*01	TRBJ2-5*01	TRBC2*01	TRUE	TRUE	CASSLERTGRETQYF	TGTGCCAGCAGCTTAGAGAGGACAGGGCGAGAGACCCAGTACTTC	11294	3	clonotype1567	clonotype1567_consensus_2	single TCR
GGGATGAGTAGCTGCC-1	TRUE	GGGATGAGTAGCTGCC-1_contig_2	TRUE	672	TRA	TRAV21*01	None	TRAJ47*01	TRAC*01	TRUE	TRUE	CADSMEYGNKLVF	TGTGCTGACTCCATGGAATATGGAAACAAACTGGTCTTT	8485	2	clonotype1567	clonotype1567_consensus_1	single TCR
GGGATGATCCGCATAA-1	TRUE	GGGATGATCCGCATAA-1_contig_1	TRUE	497	TRA	TRAV38-2/DV8*01	None	TRAJ58*01	TRAC*01	TRUE	TRUE	CAYRRGETSGSRLTF	TGTGCTTATAGGAGAGGAGAAACCAGTGGCTCTAGGTTGACCTTT	4269	1	clonotype1569	clonotype1569_consensus_2	single TCR
GGGATGATCCGCATAA-1	TRUE	GGGATGATCCGCATAA-1_contig_3	TRUE	660	TRB	TRBV29-1*01	TRBD1*01	TRBJ2-5*01	TRBC2*01	TRUE	TRUE	CSAGTGKETQYF	TGCAGCGCCGGGACAGGAAAAGAGACCCAGTACTTC	17011	5	clonotype1569	clonotype1569_consensus_1	single TCR
GGGCACTGTAGAAAGG-1	TRUE	GGGCACTGTAGAAAGG-1_contig_1	TRUE	679	TRB	TRBV19*01	None	TRBJ1-2*01	TRBC1*01	TRUE	TRUE	CASSMSPSYYGYTF	TGTGCCAGTAGTATGTCGCCCAGCTACTATGGCTACACCTTC	3597	2	clonotype1573	clonotype1573_consensus_2	single TCR
GGGCACTGTAGAAAGG-1	TRUE	GGGCACTGTAGAAAGG-1_contig_2	TRUE	493	TRA	TRAV38-2/DV8*01	None	TRAJ43*01	TRAC*01	TRUE	TRUE	CAYRLGDNDMRF	TGTGCTTATAGGTTGGGAGACAATGACATGCGCTTT	2983	1	clonotype1573	clonotype1573_consensus_1	single TCR
GGGCACTGTATTCTCT-1	TRUE	GGGCACTGTATTCTCT-1_contig_1	TRUE	726	TRB	TRBV5-6*01	TRBD2*02	TRBJ2-1*01	TRBC2*01	TRUE	TRUE	CASSLIWTSGRHEQFF	TGTGCCAGCAGCTTGATCTGGACTAGCGGGAGGCATGAGCAGTTCTTC	26787	9	clonotype1574	clonotype1574_consensus_2	single TCR
GGGCACTGTATTCTCT-1	TRUE	GGGCACTGTATTCTCT-1_contig_4	TRUE	684	TRA	TRAV8-3*01	None	TRAJ6*01	TRAC*01	TRUE	TRUE	CAVGALGGSYIPTF	TGTGCTGTGGGTGCCCTAGGAGGAAGCTACATACCTACATTT	3765	2	clonotype1574	clonotype1574_consensus_1	single TCR
GGGCACTTCTTATCTG-1	TRUE	GGGCACTTCTTATCTG-1_contig_1	TRUE	677	TRB	TRBV7-2*01	TRBD2*02	TRBJ1-1*01	TRBC1*01	TRUE	TRUE	CASSFWKGNTEAFF	TGTGCCAGCAGCTTTTGGAAGGGGAACACTGAAGCTTTCTTT	8996	5	clonotype1576	clonotype1576_consensus_2	single TCR
GGGCACTTCTTATCTG-1	TRUE	GGGCACTTCTTATCTG-1_contig_2	TRUE	519	TRA	TRAV29/DV5*01	None	TRAJ39*01	TRAC*01	TRUE	TRUE	CAAMNNNAGNMLTF	TGTGCAGCCATGAATAATAATGCAGGCAACATGCTCACCTTT	8772	3	clonotype1576	clonotype1576_consensus_1	single TCR
GGGCATCCAGGTCCAC-1	TRUE	GGGCATCCAGGTCCAC-1_contig_1	TRUE	840	TRB	TRBV5-5*01	TRBD1*01	TRBJ2-5*01	TRBC2*01	TRUE	TRUE	CASSLEGTPQETQYF	TGTGCCAGCAGCTTGGAGGGGACCCCGCAAGAGACCCAGTACTTC	7280	4	clonotype1578	clonotype1578_consensus_2	single TCR
GGGCATCCAGGTCCAC-1	TRUE	GGGCATCCAGGTCCAC-1_contig_3	TRUE	681	TRA	TRAV8-3*01	None	TRAJ35*01	TRAC*01	TRUE	TRUE	CAVGAGGFGNVLHC	TGTGCTGTGGGTGCGGGAGGCTTTGGGAATGTGCTGCATTGC	3202	1	clonotype1578	clonotype1578_consensus_1	single TCR
GGGCATCGTACAGACG-1	TRUE	GGGCATCGTACAGACG-1_contig_1	TRUE	514	TRB	TRBV12-4*01	None	TRBJ2-3*01	TRBC2*01	TRUE	TRUE	CASSHTDTQYF	TGTGCCAGCTCACACACAGATACGCAGTATTTT	12492	4	clonotype1581	clonotype1581_consensus_1	single TCR
GGGCATCGTACAGACG-1	TRUE	GGGCATCGTACAGACG-1_contig_2	TRUE	548	TRA	TRAV5*01	None	TRAJ33*01	TRAC*01	TRUE	TRUE	CAERPGYQLIW	TGTGCAGAGAGGCCAGGCTATCAGTTAATCTGG	1778	1	clonotype1581	clonotype1581_consensus_2	single TCR
GGGCATCGTACCATCA-1	TRUE	GGGCATCGTACCATCA-1_contig_1	TRUE	732	TRB	TRBV27*01	TRBD1*01	TRBJ2-1*01	TRBC1*01	TRUE	TRUE	CASSLTRDSSYNEQFF	TGTGCCAGCAGTTTGACCCGGGACAGCTCCTACAATGAGCAGTTCTTC	10823	3	clonotype1582	clonotype1582_consensus_1	single TCR
GGGCATCGTACCATCA-1	TRUE	GGGCATCGTACCATCA-1_contig_3	TRUE	675	TRA	TRAV3*01	None	TRAJ26*01	TRAC*01	TRUE	TRUE	CAVRDTSYGQNFVF	TGTGCTGTGAGAGACACCTCCTATGGTCAGAATTTTGTCTTT	6379	2	clonotype1582	clonotype1582_consensus_2	single TCR
GGGTCTGAGTGTTTGC-1	TRUE	GGGTCTGAGTGTTTGC-1_contig_1	TRUE	751	TRB	TRBV30*01	TRBD1*01	TRBJ1-1*01	TRBC1*01	TRUE	TRUE	CAWSLGQGNTEAFF	TGTGCCTGGAGTTTGGGACAGGGGAACACTGAAGCTTTCTTT	10222	3	clonotype1585	clonotype1585_consensus_1	single TCR
GGGTCTGAGTGTTTGC-1	TRUE	GGGTCTGAGTGTTTGC-1_contig_4	TRUE	570	TRA	TRAV29/DV5*01	None	TRAJ40*01	TRAC*01	TRUE	TRUE	CAASGDPGTYKYIF	TGTGCAGCAAGCGGGGACCCAGGAACCTACAAATACATCTTT	1301	1	clonotype1585	clonotype1585_consensus_2	single TCR
GGGTCTGCAGCCTGTG-1	TRUE	GGGTCTGCAGCCTGTG-1_contig_1	TRUE	525	TRB	TRBV4-1*01	None	TRBJ2-2*01	TRBC2*01	TRUE	TRUE	CASSQSRTGELFF	TGCGCCAGCAGCCAATCGCGCACCGGGGAGCTGTTTTTT	12067	4	clonotype1586	clonotype1586_consensus_2	single TCR
GGGTCTGCAGCCTGTG-1	TRUE	GGGTCTGCAGCCTGTG-1_contig_2	TRUE	534	TRA	TRAV23/DV6*01	None	TRAJ27*01	TRAC*01	TRUE	TRUE	CAARYLNAGKSTF	TGTGCAGCAAGATATCTCAATGCAGGCAAATCAACCTTT	1562	1	clonotype1586	clonotype1586_consensus_1	single TCR
GGGTCTGCAGGCAGTA-1	TRUE	GGGTCTGCAGGCAGTA-1_contig_2	TRUE	805	TRA	TRAV8-4*01	None	TRAJ49*01	TRAC*01	TRUE	TRUE	CAVSVRVGNQFYF	TGTGCTGTGAGCGTGAGAGTGGGTAACCAGTTCTATTTT	5877	2	clonotype1587	clonotype1587_consensus_1	single TCR
GGGTCTGCAGGCAGTA-1	TRUE	GGGTCTGCAGGCAGTA-1_contig_4	TRUE	681	TRB	TRBV12-4*01	None	TRBJ1-1*01	TRBC1*01	TRUE	TRUE	CASSFPVNTEAFF	TGTGCCAGCAGTTTTCCGGTGAACACTGAAGCTTTCTTT	2679	1	clonotype1587	clonotype1587_consensus_2	single TCR
GGGTTGCGTAGGACAC-1	TRUE	GGGTTGCGTAGGACAC-1_contig_1	TRUE	820	TRB	TRBV6-6*02	None	TRBJ2-2*01	TRBC2*01	TRUE	TRUE	CASSSRLNTGELFF	TGTGCCAGCAGTTCCCGTCTGAACACCGGGGAGCTGTTTTTT	18836	8	clonotype1596	clonotype1596_consensus_2	single TCR
GGGTTGCGTAGGACAC-1	TRUE	GGGTTGCGTAGGACAC-1_contig_2	TRUE	514	TRA	TRAV6*01	None	TRAJ11*01	TRAC*01	TRUE	TRUE	CASPGENSGYSTLTF	TGTGCTTCACCCGGGGAGAACTCAGGATACAGCACCCTCACCTTT	4000	1	clonotype1596	clonotype1596_consensus_1	single TCR
GGTATTGCAAAGCGGT-1	TRUE	GGTATTGCAAAGCGGT-1_contig_1	TRUE	679	TRB	TRBV24-1*01	TRBD2*01	TRBJ2-1*01	TRBC2*01	TRUE	TRUE	CATSDPQGLAGNEQFF	TGTGCCACCAGTGACCCCCAGGGACTAGCGGGCAATGAGCAGTTCTTC	19207	7	clonotype1599	clonotype1599_consensus_1	single TCR
GGTATTGCAAAGCGGT-1	TRUE	GGTATTGCAAAGCGGT-1_contig_3	TRUE	526	TRA	TRAV29/DV5*01	None	TRAJ53*01	TRAC*01	TRUE	TRUE	CAADQGGSNYKLTF	TGTGCAGCCGACCAGGGGGGTAGCAACTATAAACTGACATTT	4149	2	clonotype1599	clonotype1599_consensus_2	single TCR
GGTATTGCACGCTTTC-1	TRUE	GGTATTGCACGCTTTC-1_contig_1	TRUE	533	TRB	TRBV7-3*01	TRBD2*02	TRBJ2-1*01	TRBC2*01	TRUE	TRUE	CASSLTGTSGSNEQFF	TGTGCCAGCAGTTTAACCGGGACTAGCGGGAGCAATGAGCAGTTCTTC	13655	4	clonotype1600	clonotype1600_consensus_2	single TCR
GGTATTGCACGCTTTC-1	TRUE	GGTATTGCACGCTTTC-1_contig_2	TRUE	723	TRA	TRAV8-6*02	None	TRAJ30*01	TRAC*01	TRUE	TRUE	CAVRKNRDDKIIF	TGTGCTGTGAGGAAGAACAGAGATGACAAGATCATCTTT	1810	1	clonotype1600	clonotype1600_consensus_1	single TCR
GGTATTGCAGGGTATG-1	TRUE	GGTATTGCAGGGTATG-1_contig_1	TRUE	699	TRA	TRAV3*01	None	TRAJ6*01	TRAC*01	TRUE	TRUE	CAVRDGGSYIPTF	TGTGCTGTGAGAGACGGGGGAAGCTACATACCTACATTT	2752	2	clonotype1601	clonotype1601_consensus_2	single TCR
GGTATTGCAGGGTATG-1	TRUE	GGTATTGCAGGGTATG-1_contig_2	TRUE	687	TRB	TRBV6-5*01	TRBD1*01	TRBJ1-4*01	TRBC1*01	TRUE	TRUE	CASSPTGSNEKLFF	TGTGCCAGCAGCCCGACAGGAAGTAATGAAAAACTGTTTTTT	3336	1	clonotype1601	clonotype1601_consensus_1	single TCR
GGTATTGGTTAAAGAC-1	TRUE	GGTATTGGTTAAAGAC-1_contig_1	TRUE	733	TRB	TRBV27*01	None	TRBJ2-1*01	TRBC2*01	TRUE	TRUE	CASSRSALLRNEQFF	TGTGCCAGCAGTAGGTCTGCACTATTGAGGAATGAGCAGTTCTTC	7006	3	clonotype1603	clonotype1603_consensus_1	single TCR
GGTATTGGTTAAAGAC-1	TRUE	GGTATTGGTTAAAGAC-1_contig_2	TRUE	574	TRA	TRAV12-2*01	None	TRAJ45*01	TRAC*01	TRUE	TRUE	CAVNPGGGADGLTF	TGTGCCGTGAACCCGGGAGGAGGTGCTGACGGACTCACCTTT	10311	3	clonotype1603	clonotype1603_consensus_2	single TCR
GGTGAAGGTGTTCGAT-1	TRUE	GGTGAAGGTGTTCGAT-1_contig_1	TRUE	498	TRB	TRBV5-5*01	None	TRBJ1-1*01	TRBC1*01	TRUE	TRUE	CASSFGFTEAFF	TGTGCCAGCAGCTTTGGGTTTACTGAAGCTTTCTTT	7467	3	clonotype1607	clonotype1607_consensus_1	single TCR
GGTGAAGGTGTTCGAT-1	TRUE	GGTGAAGGTGTTCGAT-1_contig_2	TRUE	518	TRA	TRAV35*01	None	TRAJ53*01	TRAC*01	TRUE	TRUE	CAGQLSGGSNYKLTF	TGTGCTGGGCAGCTAAGTGGAGGTAGCAACTATAAACTGACATTT	102	1	clonotype1607	clonotype1607_consensus_2	single TCR
GGTGCGTGTAAGGATT-1	TRUE	GGTGCGTGTAAGGATT-1_contig_1	TRUE	696	TRB	TRBV7-2*01	TRBD2*01	TRBJ2-3*01	TRBC2*01	TRUE	TRUE	CASSLAHASVSTDTQYF	TGTGCCAGCAGCTTAGCGCATGCTAGCGTAAGCACAGATACGCAGTATTTT	36200	12	clonotype1610	clonotype1610_consensus_1	single TCR
GGTGCGTGTAAGGATT-1	TRUE	GGTGCGTGTAAGGATT-1_contig_2	TRUE	449	TRA	TRAV9-2*01	None	TRAJ49*01	TRAC*01	TRUE	TRUE	CALSGRTGNQFYF	TGTGCTCTGAGTGGACGCACCGGTAACCAGTTCTATTTT	1987	1	clonotype1610	clonotype1610_consensus_2	single TCR
GGTGTTACACTGTCGG-1	TRUE	GGTGTTACACTGTCGG-1_contig_1	TRUE	535	TRB	TRBV3-1*01	TRBD1*01	TRBJ1-3*01	TRBC1*01	TRUE	TRUE	CASSQRTGLSGNTIYF	TGTGCCAGCAGCCAACGGACAGGGCTTTCTGGAAACACCATATATTTT	9130	4	clonotype1616	clonotype1616_consensus_1	single TCR
GGTGTTACACTGTCGG-1	TRUE	GGTGTTACACTGTCGG-1_contig_2	TRUE	616	TRA	TRAV8-4*01	None	TRAJ48*01	TRAC*01	TRUE	TRUE	CAVSSFGNEKLTF	TGTGCTGTGAGTTCCTTTGGAAATGAGAAATTAACCTTT	3199	1	clonotype1616	clonotype1616_consensus_2	single TCR
GGTGTTAGTCAGAATA-1	TRUE	GGTGTTAGTCAGAATA-1_contig_1	TRUE	704	TRB	TRBV5-5*01	TRBD2*02	TRBJ1-1*01	TRBC1*01	TRUE	TRUE	CASSLRSQGGTEAFF	TGTGCCAGCAGCTTGAGATCCCAGGGAGGGACTGAAGCTTTCTTT	13573	4	clonotype1617	clonotype1617_consensus_1	single TCR
GGTGTTAGTCAGAATA-1	TRUE	GGTGTTAGTCAGAATA-1_contig_4	TRUE	687	TRA	TRAV8-3*01	None	TRAJ20*01	TRAC*01	TRUE	TRUE	CAVGTPLGYKLSF	TGTGCTGTGGGTACCCCACTCGGCTACAAGCTCAGCTTT	12669	4	clonotype1617	clonotype1617_consensus_2	single TCR
GGTGTTAGTTAGTGGG-1	TRUE	GGTGTTAGTTAGTGGG-1_contig_1	TRUE	699	TRB	TRBV6-5*01	TRBD2*02	TRBJ2-7*01	TRBC2*01	TRUE	TRUE	CASSYSASGNYEQYF	TGTGCCAGCAGTTACTCGGCCAGCGGGAACTACGAGCAGTACTTC	13071	5	clonotype1618	clonotype1618_consensus_1	single TCR
GGTGTTAGTTAGTGGG-1	TRUE	GGTGTTAGTTAGTGGG-1_contig_3	TRUE	674	TRA	TRAV3*01	None	TRAJ9*01	TRAC*01	TRUE	TRUE	CAVRGPNTGGFKTIF	TGTGCTGTGAGAGGACCTAATACTGGAGGCTTCAAAACTATCTTT	3804	1	clonotype1618	clonotype1618_consensus_2	single TCR
GTAACGTAGAGTAATC-1	TRUE	GTAACGTAGAGTAATC-1_contig_2	TRUE	735	TRA	TRAV12-2*01	None	TRAJ31*01	TRAC*01	TRUE	TRUE	CAVNTNARLMF	TGTGCCGTGAACACGAATGCCAGACTCATGTTT	3683	1	clonotype1619	clonotype1619_consensus_2	single TCR
GTAACGTAGAGTAATC-1	TRUE	GTAACGTAGAGTAATC-1_contig_3	TRUE	656	TRB	TRBV29-1*01	TRBD1*01	TRBJ1-1*01	TRBC1*01	TRUE	TRUE	CSVVNRDNTEAFF	TGCAGCGTTGTTAACAGGGACAACACTGAAGCTTTCTTT	3573	1	clonotype1619	clonotype1619_consensus_1	single TCR
GTAACGTCAATTCCTT-1	TRUE	GTAACGTCAATTCCTT-1_contig_2	TRUE	639	TRB	TRBV19*01	TRBD2*02	TRBJ2-5*01	TRBC2*01	TRUE	TRUE	CASSIASGNQETQYF	TGTGCCAGTAGTATTGCTAGCGGGAACCAAGAGACCCAGTACTTC	1588	1	clonotype1620	clonotype1620_consensus_1	single TCR
GTAACGTCAATTCCTT-1	TRUE	GTAACGTCAATTCCTT-1_contig_3	TRUE	512	TRA	TRAV2*01	None	TRAJ27*01	TRAC*01	TRUE	TRUE	CAVINTNAGKSTF	TGTGCTGTTATTAACACCAATGCAGGCAAATCAACCTTT	3491	1	clonotype1620	clonotype1620_consensus_2	single TCR
GTAACGTCATCTCCCA-1	TRUE	GTAACGTCATCTCCCA-1_contig_1	TRUE	523	TRA	TRAV24*01	None	TRAJ44*01	TRAC*01	TRUE	TRUE	CAITGTASKLTF	TGTGCCATCACCGGCACTGCCAGTAAACTCACCTTT	3936	1	clonotype1621	clonotype1621_consensus_2	single TCR
GTAACGTCATCTCCCA-1	TRUE	GTAACGTCATCTCCCA-1_contig_3	TRUE	727	TRB	TRBV29-1*01	TRBD1*01	TRBJ1-1*01	TRBC1*01	TRUE	TRUE	CSVEEQGEAFF	TGCAGCGTTGAAGAGCAGGGGGAAGCTTTCTTT	17118	5	clonotype1621	clonotype1621_consensus_1	single TCR
GTAACGTGTACTCTCC-1	TRUE	GTAACGTGTACTCTCC-1_contig_1	TRUE	559	TRA	TRAV12-1*01	None	TRAJ9*01	TRAC*01	TRUE	TRUE	CVVTQYTGGFKTIF	TGTGTGGTGACCCAATATACTGGAGGCTTCAAAACTATCTTT	5463	2	clonotype1622	clonotype1622_consensus_1	single TCR
GTAACGTGTACTCTCC-1	TRUE	GTAACGTGTACTCTCC-1_contig_2	TRUE	533	TRB	TRBV4-1*01	TRBD2*02	TRBJ2-3*01	TRBC2*01	TRUE	TRUE	CASSQVSGGRAQDTQYF	TGCGCCAGCAGCCAAGTTTCGGGCGGGAGGGCCCAAGATACGCAGTATTTT	14499	5	clonotype1622	clonotype1622_consensus_2	single TCR
GTAACGTGTCCGTGAC-1	TRUE	GTAACGTGTCCGTGAC-1_contig_1	TRUE	673	TRB	TRBV14*01	None	TRBJ2-2*01	TRBC2*01	TRUE	TRUE	CASSQDVGLWDTGELFF	TGTGCCAGCAGCCAAGATGTGGGGTTGTGGGACACCGGGGAGCTGTTTTTT	5712	3	clonotype1623	clonotype1623_consensus_1	single TCR
GTAACGTGTCCGTGAC-1	TRUE	GTAACGTGTCCGTGAC-1_contig_2	TRUE	637	TRA	TRAV8-4*01	None	TRAJ49*01	TRAC*01	TRUE	TRUE	CAVRTGNQFYF	TGTGCTGTGAGAACCGGTAACCAGTTCTATTTT	2535	1	clonotype1623	clonotype1623_consensus_2	single TCR
GTAACTGGTCAAAGAT-1	TRUE	GTAACTGGTCAAAGAT-1_contig_1	TRUE	674	TRB	TRBV7-6*01	TRBD2*01	TRBJ2-2*01	TRBC2*01	TRUE	TRUE	CASRQGGGPFAGELFF	TGTGCCAGCAGACAGGGCGGGGGGCCTTTCGCCGGGGAGCTGTTTTTT	7870	2	clonotype1625	clonotype1625_consensus_1	single TCR
GTAACTGGTCAAAGAT-1	TRUE	GTAACTGGTCAAAGAT-1_contig_3	TRUE	498	TRA	TRAV9-2*01	None	TRAJ10*01	TRAC*01	TRUE	TRUE	CALRATGGGNKLTF	TGTGCTCTCCGCGCCACGGGAGGAGGAAACAAACTCACCTTT	10482	3	clonotype1625	clonotype1625_consensus_2	single TCR
GTAACTGTCATCGGAT-1	TRUE	GTAACTGTCATCGGAT-1_contig_1	TRUE	540	TRA	TRAV13-1*01	None	TRAJ16*01	TRAC*01	TRUE	TRUE	CAVLTDGQKLLF	TGTGCAGTCCTAACAGATGGCCAGAAGCTGCTCTTT	4337	2	clonotype1626	clonotype1626_consensus_1	single TCR
GTAACTGTCATCGGAT-1	TRUE	GTAACTGTCATCGGAT-1_contig_2	TRUE	690	TRB	TRBV2*01	TRBD1*01	TRBJ2-2*01	TRBC2*01	TRUE	TRUE	CASRLDSFSNTGELFF	TGTGCCAGCAGATTAGACAGTTTTTCGAACACCGGGGAGCTGTTTTTT	7134	3	clonotype1626	clonotype1626_consensus_2	single TCR
GTAACTGTCCAACCAA-1	TRUE	GTAACTGTCCAACCAA-1_contig_1	TRUE	724	TRB	TRBV6-2*01	TRBD1*01	TRBJ1-6*01	TRBC1*01	TRUE	TRUE	CASSTPGQALGSPLHF	TGTGCCAGCAGTACCCCGGGACAGGCCTTGGGTTCACCCCTCCACTTT	19238	7	clonotype1627	clonotype1627_consensus_2	single TCR
GTAACTGTCCAACCAA-1	TRUE	GTAACTGTCCAACCAA-1_contig_3	TRUE	594	TRA	TRAV25*01	None	TRAJ9*01	TRAC*01	TRUE	TRUE	CAGISRTGGFKTIF	TGTGCAGGGATATCACGGACTGGAGGCTTCAAAACTATCTTT	5365	2	clonotype1627	clonotype1627_consensus_1	single TCR
GTACGTAAGACTAGAT-1	TRUE	GTACGTAAGACTAGAT-1_contig_1	TRUE	623	TRA	TRAV8-4*01	None	TRAJ15*01	TRAC*01	TRUE	TRUE	CAVSARRQAGTALIF	TGTGCTGTGAGTGCCCGGCGCCAGGCAGGAACTGCTCTGATCTTT	6791	2	clonotype1629	clonotype1629_consensus_2	single TCR
GTACGTAAGACTAGAT-1	TRUE	GTACGTAAGACTAGAT-1_contig_2	TRUE	656	TRB	TRBV4-1*01	TRBD2*02	TRBJ2-7*01	TRBC2*01	TRUE	TRUE	CASSQDPWEEQYF	TGCGCCAGCAGCCAAGATCCCTGGGAGGAGCAGTACTTC	9576	3	clonotype1629	clonotype1629_consensus_1	single TCR
GTACGTAGTCAGAATA-1	TRUE	GTACGTAGTCAGAATA-1_contig_1	TRUE	667	TRB	TRBV4-1*01	TRBD2*01	TRBJ1-2*01	TRBC1*01	TRUE	TRUE	CASSQGGRTEESYGYTF	TGCGCCAGCAGCCAGGGGGGGAGGACAGAGGAGAGTTATGGCTACACCTTC	21512	7	clonotype1630	clonotype1630_consensus_1	single TCR
GTACGTAGTCAGAATA-1	TRUE	GTACGTAGTCAGAATA-1_contig_4	TRUE	682	TRA	TRAV8-3*01	None	TRAJ54*01	TRAC*01	TRUE	TRUE	CAVGAWGAQKLVF	TGTGCTGTGGGTGCGTGGGGAGCCCAGAAGCTGGTATTT	3626	1	clonotype1630	clonotype1630_consensus_2	single TCR
GTACGTATCAAAGACA-1	TRUE	GTACGTATCAAAGACA-1_contig_1	TRUE	562	TRA	TRAV19*01	None	TRAJ31*01	TRAC*01	TRUE	TRUE	CALSEIANARLMF	TGTGCTCTGAGCGAGATAGCCAATGCCAGACTCATGTTT	1815	1	clonotype1632	clonotype1632_consensus_2	single TCR
GTACGTATCAAAGACA-1	TRUE	GTACGTATCAAAGACA-1_contig_2	TRUE	700	TRB	TRBV5-1*01	TRBD1*01	TRBJ2-1*01	TRBC2*01	TRUE	TRUE	CASSLSPGRDRLYNEQFF	TGCGCCAGCAGCTTATCCCCCGGTAGGGACAGACTCTACAATGAGCAGTTCTTC	20734	8	clonotype1632	clonotype1632_consensus_1	single TCR
GTACTCCGTGTTTGGT-1	TRUE	GTACTCCGTGTTTGGT-1_contig_1	TRUE	453	TRA	TRAV9-2*01	None	TRAJ8*01	TRAC*01	TRUE	TRUE	CALRGGGFQKLVF	TGTGCTCTGAGAGGGGGAGGCTTTCAGAAACTTGTATTT	7092	2	clonotype1633	clonotype1633_consensus_2	single TCR
GTACTCCGTGTTTGGT-1	TRUE	GTACTCCGTGTTTGGT-1_contig_2	TRUE	703	TRB	TRBV20-1*02	TRBD1*01	TRBJ1-1*01	TRBC1*01	TRUE	TRUE	CSARKDSLEAEAFF	TGCAGTGCTAGGAAGGACAGTCTTGAGGCTGAAGCTTTCTTT	14985	5	clonotype1633	clonotype1633_consensus_1	single TCR
GTACTCCTCCATGAAC-1	TRUE	GTACTCCTCCATGAAC-1_contig_1	TRUE	539	TRA	TRAV13-1*01	None	TRAJ3*01	TRAC*01	TRUE	TRUE	CAARYSSASKIIF	TGTGCAGCGCGGTACAGCAGTGCTTCCAAGATAATCTTT	7527	2	clonotype1634	clonotype1634_consensus_2	single TCR
GTACTCCTCCATGAAC-1	TRUE	GTACTCCTCCATGAAC-1_contig_2	TRUE	699	TRB	TRBV4-1*01	None	TRBJ1-2*01	TRBC1*01	TRUE	TRUE	CASSQDLNPIYGYTF	TGCGCCAGCAGCCAAGATCTTAACCCAATCTATGGCTACACCTTC	16417	5	clonotype1634	clonotype1634_consensus_1	single TCR
GTACTTTGTCCGAGTC-1	TRUE	GTACTTTGTCCGAGTC-1_contig_1	TRUE	699	TRB	TRBV6-5*01	TRBD2*01	TRBJ1-6*02	TRBC1*01	TRUE	TRUE	CASSWKVPENSPLHF	TGTGCCAGCAGTTGGAAGGTACCGGAGAATTCACCCCTCCACTTT	7157	2	clonotype1637	clonotype1637_consensus_2	single TCR
GTACTTTGTCCGAGTC-1	TRUE	GTACTTTGTCCGAGTC-1_contig_4	TRUE	542	TRA	TRAV13-2*01	None	TRAJ28*01	TRAC*01	TRUE	TRUE	CAELLWAGSYQLTF	TGTGCAGAGCTCCTCTGGGCTGGGAGTTACCAACTCACTTTC	3636	1	clonotype1637	clonotype1637_consensus_1	single TCR
GTAGGCCAGTCACGCC-1	TRUE	GTAGGCCAGTCACGCC-1_contig_1	TRUE	737	TRB	TRBV2*01	TRBD1*01	TRBJ2-3*01	TRBC2*01	TRUE	TRUE	CASSEGTGSTDTQYF	TGTGCCAGCAGTGAAGGGACAGGAAGTACAGATACGCAGTATTTT	37115	12	clonotype1640	clonotype1640_consensus_2	single TCR
GTAGGCCAGTCACGCC-1	TRUE	GTAGGCCAGTCACGCC-1_contig_2	TRUE	498	TRA	TRAV21*01	None	TRAJ12*01	TRAC*01	TRUE	TRUE	CAVTMDSSYKLIF	TGTGCTGTGACGATGGATAGCAGCTATAAATTGATCTTC	15246	4	clonotype1640	clonotype1640_consensus_1	single TCR
GTAGGCCTCGCATGGC-1	TRUE	GTAGGCCTCGCATGGC-1_contig_1	TRUE	693	TRB	TRBV2*01	TRBD2*01	TRBJ1-4*01	TRBC1*01	TRUE	TRUE	CASSEGGIANEKLFF	TGTGCCAGCAGCGAGGGGGGAATAGCTAATGAAAAACTGTTTTTT	12696	5	clonotype1644	clonotype1644_consensus_1	single TCR
GTAGGCCTCGCATGGC-1	TRUE	GTAGGCCTCGCATGGC-1_contig_2	TRUE	643	TRA	TRAV8-4*01	None	TRAJ31*01	TRAC*01	TRUE	TRUE	CAVNRNNNARLMF	TGTGCTGTGAATCGGAATAACAATGCCAGACTCATGTTT	4453	2	clonotype1644	clonotype1644_consensus_2	single TCR
GTAGGCCTCGCTAGCG-1	TRUE	GTAGGCCTCGCTAGCG-1_contig_1	TRUE	510	TRB	TRBV9*01	TRBD1*01	TRBJ2-1*01	TRBC2*01	TRUE	TRUE	CASSARGVDYNEQFF	TGTGCCAGCAGCGCCAGGGGTGTGGACTACAATGAGCAGTTCTTC	9752	3	clonotype1645	clonotype1645_consensus_2	single TCR
GTAGGCCTCGCTAGCG-1	TRUE	GTAGGCCTCGCTAGCG-1_contig_2	TRUE	670	TRA	TRAV23/DV6*01	None	TRAJ18*01	TRAC*01	TRUE	TRUE	CARGSTLGRLYF	TGCGCCAGAGGCTCAACCCTGGGGAGGCTATACTTT	6327	2	clonotype1645	clonotype1645_consensus_1	single TCR
GTAGTCAAGGAGCGAG-1	TRUE	GTAGTCAAGGAGCGAG-1_contig_1	TRUE	710	TRA	TRAV16*01	None	TRAJ52*01	TRAC*01	TRUE	TRUE	CALRGGTSYGKLTF	TGTGCTCTCCGTGGTGGTACTAGCTATGGAAAGCTGACATTT	4242	1	clonotype1646	clonotype1646_consensus_2	single TCR
GTAGTCAAGGAGCGAG-1	TRUE	GTAGTCAAGGAGCGAG-1_contig_2	TRUE	767	TRB	TRBV5-8*01	None	TRBJ2-3*01	TRBC2*01	TRUE	TRUE	CASSLETAWVSNTQYF	TGTGCCAGCAGCTTGGAAACAGCCTGGGTTTCAAATACGCAGTATTTT	4780	2	clonotype1646	clonotype1646_consensus_1	single TCR
GTAGTCAGTCAACTGT-1	TRUE	GTAGTCAGTCAACTGT-1_contig_1	TRUE	487	TRA	TRAV21*01	None	TRAJ49*01	TRAC*01	TRUE	TRUE	CAVTGNQFYF	TGTGCTGTGACCGGTAACCAGTTCTATTTT	4947	1	clonotype1647	clonotype1647_consensus_2	single TCR
GTAGTCAGTCAACTGT-1	TRUE	GTAGTCAGTCAACTGT-1_contig_2	TRUE	532	TRB	TRBV12-4*01	TRBD2*01	TRBJ2-1*01	TRBC2*01	TRUE	TRUE	CASSPRLSGTAEQFF	TGTGCCAGCAGCCCGCGTCTAAGCGGCACAGCTGAGCAGTTCTTC	12055	4	clonotype1647	clonotype1647_consensus_1	single TCR
GTATCTTAGGCATTGG-1	TRUE	GTATCTTAGGCATTGG-1_contig_1	TRUE	533	TRB	TRBV6-1*01	TRBD2*02	TRBJ2-7*01	TRBC2*01	TRUE	TRUE	CASSEGWFGSNYEQYF	TGTGCCAGCAGTGAAGGATGGTTCGGCAGCAACTACGAGCAGTACTTC	6678	2	clonotype1649	clonotype1649_consensus_2	single TCR
GTATCTTAGGCATTGG-1	TRUE	GTATCTTAGGCATTGG-1_contig_2	TRUE	534	TRA	TRAV36/DV7*01	None	TRAJ53*01	TRAC*01	TRUE	TRUE	CAVGGGGSNYKLTF	TGTGCTGTGGGGGGAGGAGGTAGCAACTATAAACTGACATTT	3947	1	clonotype1649	clonotype1649_consensus_1	single TCR
GTATCTTAGTGGTCCC-1	TRUE	GTATCTTAGTGGTCCC-1_contig_1	TRUE	649	TRB	TRBV2*01	None	TRBJ2-1*01	TRBC2*01	TRUE	TRUE	CASSEDAAEQFF	TGTGCCAGCAGTGAAGACGCCGCCGAGCAGTTCTTC	10935	3	clonotype1650	clonotype1650_consensus_1	single TCR
GTATCTTAGTGGTCCC-1	TRUE	GTATCTTAGTGGTCCC-1_contig_4	TRUE	623	TRA	TRAV38-1*01	None	TRAJ57*01	TRAC*01	TRUE	TRUE	CAFMKPQGGSEKLVF	TGTGCTTTCATGAAGCCTCAGGGCGGATCTGAAAAGCTGGTCTTT	4251	2	clonotype1650	clonotype1650_consensus_2	single TCR
GTATCTTAGTGTTTGC-1	TRUE	GTATCTTAGTGTTTGC-1_contig_1	TRUE	804	TRB	TRBV6-6*01	TRBD2*02	TRBJ2-7*01	TRBC2*01	TRUE	TRUE	CASSYWGGTSKYEQYF	TGTGCCAGCAGTTACTGGGGAGGGACATCAAAATACGAGCAGTACTTC	9609	3	clonotype1651	clonotype1651_consensus_1	single TCR
GTATCTTAGTGTTTGC-1	TRUE	GTATCTTAGTGTTTGC-1_contig_3	TRUE	531	TRA	TRAV23/DV6*01	None	TRAJ5*01	TRAC*01	TRUE	TRUE	CAASRGTGRRALTF	TGTGCAGCAAGTCGAGGCACGGGCAGGAGAGCACTTACTTTT	2714	1	clonotype1651	clonotype1651_consensus_2	single TCR
GTATCTTGTGACAAAT-1	TRUE	GTATCTTGTGACAAAT-1_contig_1	TRUE	497	TRA	TRAV17*01	None	TRAJ27*01	TRAC*01	TRUE	TRUE	CATLNAGKSTF	TGTGCTACTTTAAATGCAGGCAAATCAACCTTT	13084	3	clonotype1653	clonotype1653_consensus_1	single TCR
GTATCTTGTGACAAAT-1	TRUE	GTATCTTGTGACAAAT-1_contig_2	TRUE	674	TRB	TRBV5-4*01	None	TRBJ2-1*01	TRBC2*01	TRUE	TRUE	CASSYSYNEQFF	TGTGCCAGCAGCTACAGTTACAATGAGCAGTTCTTC	12523	5	clonotype1653	clonotype1653_consensus_2	single TCR
GTATCTTTCCGCTGTT-1	TRUE	GTATCTTTCCGCTGTT-1_contig_1	TRUE	426	TRA	TRAV10*01	None	TRAJ20*01	TRAC*01	TRUE	TRUE	CVVSARGNYKLSF	TGTGTGGTGAGCGCGCGGGGAAACTACAAGCTCAGCTTT	4891	1	clonotype1654	clonotype1654_consensus_2	single TCR
GTATCTTTCCGCTGTT-1	TRUE	GTATCTTTCCGCTGTT-1_contig_2	TRUE	642	TRB	TRBV28*01	TRBD2*01	TRBJ1-1*01	TRBC1*01	TRUE	TRUE	CASSLGPGGTEAFF	TGTGCCAGCAGTTTGGGGCCGGGGGGCACTGAAGCTTTCTTT	2944	1	clonotype1654	clonotype1654_consensus_1	single TCR
GTATTCTAGCAGATCG-1	TRUE	GTATTCTAGCAGATCG-1_contig_1	TRUE	668	TRB	TRBV4-1*01	TRBD1*01	TRBJ1-5*01	TRBC1*01	TRUE	TRUE	CASSHLGQGSNQPQHF	TGCGCCAGCAGCCATCTCGGACAGGGGAGCAATCAGCCCCAGCATTTT	19463	6	clonotype1655	clonotype1655_consensus_1	single TCR
GTATTCTAGCAGATCG-1	TRUE	GTATTCTAGCAGATCG-1_contig_4	TRUE	701	TRA	TRAV8-4*01	None	TRAJ53*01	TRAC*01	TRUE	TRUE	CAVRESGGSNYKLTF	TGTGCTGTGAGGGAGAGTGGAGGTAGCAACTATAAACTGACATTT	2931	2	clonotype1655	clonotype1655_consensus_2	single TCR
GTATTCTAGCTGCAAG-1	TRUE	GTATTCTAGCTGCAAG-1_contig_1	TRUE	498	TRB	TRBV7-2*01	None	TRBJ2-1*01	TRBC2*01	TRUE	TRUE	CASSLTVYNEQFF	TGTGCCAGCAGCTTAACAGTTTACAATGAGCAGTTCTTC	3656	1	clonotype1656	clonotype1656_consensus_1	single TCR
GTATTCTAGCTGCAAG-1	TRUE	GTATTCTAGCTGCAAG-1_contig_3	TRUE	702	TRA	TRAV8-3*01	None	TRAJ7*01	TRAC*01	TRUE	TRUE	CAVGAPRGGNNRLAF	TGTGCTGTGGGGGCCCCTCGGGGCGGGAACAACAGACTCGCTTTT	3177	1	clonotype1656	clonotype1656_consensus_2	single TCR
GTATTCTCACCAGGTC-1	TRUE	GTATTCTCACCAGGTC-1_contig_1	TRUE	517	TRB	TRBV6-6*01	TRBD2*01	TRBJ2-3*01	TRBC2*01	TRUE	TRUE	CASSGLGTDTQYF	TGTGCCAGCTCGGGACTGGGCACAGATACGCAGTATTTT	10144	4	clonotype1658	clonotype1658_consensus_2	single TCR
GTATTCTCACCAGGTC-1	TRUE	GTATTCTCACCAGGTC-1_contig_2	TRUE	505	TRA	TRAV17*01	None	TRAJ37*01	TRAC*01	TRUE	TRUE	CATSSAGKLIF	TGTGCTACGAGTAGTGCAGGCAAACTAATCTTT	4346	1	clonotype1658	clonotype1658_consensus_1	single TCR
GTATTCTGTCGGCACT-1	TRUE	GTATTCTGTCGGCACT-1_contig_1	TRUE	668	TRB	TRBV5-1*01	None	TRBJ1-1*01	TRBC1*01	TRUE	TRUE	CASSLDGANTEAFF	TGCGCCAGCAGCTTGGACGGAGCGAACACTGAAGCTTTCTTT	12040	4	clonotype1660	clonotype1660_consensus_2	single TCR
GTATTCTGTCGGCACT-1	TRUE	GTATTCTGTCGGCACT-1_contig_3	TRUE	494	TRA	TRAV41*01	None	TRAJ56*01	TRAC*01	TRUE	TRUE	CAVIRGANSKLTF	TGTGCTGTCATCCGTGGAGCCAATAGTAAGCTGACATTT	4946	1	clonotype1660	clonotype1660_consensus_1	single TCR
GTCACAACAGTAGAGC-1	TRUE	GTCACAACAGTAGAGC-1_contig_1	TRUE	685	TRB	TRBV3-1*01	TRBD2*01	TRBJ2-5*01	TRBC2*01	TRUE	TRUE	CASSQAGDQYF	TGTGCCAGCAGCCAAGCCGGGGATCAGTACTTC	14503	5	clonotype1667	clonotype1667_consensus_2	single TCR
GTCACAACAGTAGAGC-1	TRUE	GTCACAACAGTAGAGC-1_contig_4	TRUE	647	TRA	TRAV8-1*01	None	TRAJ39*01	TRAC*01	TRUE	TRUE	CAVNAWNAGNMLTF	TGTGCCGTGAATGCCTGGAATGCAGGCAACATGCTCACCTTT	1085	2	clonotype1667	clonotype1667_consensus_1	single TCR
GTCACAAGTTTACTCT-1	TRUE	GTCACAAGTTTACTCT-1_contig_2	TRUE	688	TRB	TRBV6-1*01	None	TRBJ2-7*01	TRBC2*01	TRUE	TRUE	CASSELHSSGEQYF	TGTGCCAGCAGTGAACTACACTCGTCCGGGGAGCAGTACTTC	1985	1	clonotype1669	clonotype1669_consensus_2	single TCR
GTCACAAGTTTACTCT-1	TRUE	GTCACAAGTTTACTCT-1_contig_3	TRUE	521	TRA	TRAV13-1*01	None	TRAJ29*01	TRAC*01	TRUE	TRUE	CAAPRGQGNTPLVF	TGTGCAGCACCCCGGGGTCAAGGAAACACACCTCTTGTCTTT	3977	1	clonotype1669	clonotype1669_consensus_1	single TCR
GTCACAATCGCCAGCA-1	TRUE	GTCACAATCGCCAGCA-1_contig_1	TRUE	683	TRB	TRBV7-2*01	None	TRBJ2-6*01	TRBC2*01	TRUE	TRUE	CASSLGPSGANVLTF	TGTGCCAGCAGCTTAGGGCCCTCTGGGGCCAACGTCCTGACTTTC	25328	8	clonotype1671	clonotype1671_consensus_1	single TCR
GTCACAATCGCCAGCA-1	TRUE	GTCACAATCGCCAGCA-1_contig_2	TRUE	524	TRA	TRAV24*01	None	TRAJ32*01	TRAC*01	TRUE	TRUE	CASPNYGGATNKLIF	TGTGCCTCTCCGAATTATGGTGGTGCTACAAACAAGCTCATCTTT	4349	2	clonotype1671	clonotype1671_consensus_2	single TCR
GTCATTTAGCGTGAAC-1	TRUE	GTCATTTAGCGTGAAC-1_contig_1	TRUE	694	TRB	TRBV7-9*03	TRBD1*01	TRBJ1-6*01	TRBC1*01	TRUE	TRUE	CASSLGTGNSPLHF	TGTGCCAGCAGCTTAGGGACAGGGAATTCACCCCTCCACTTT	13764	5	clonotype1676	clonotype1676_consensus_1	single TCR
GTCATTTAGCGTGAAC-1	TRUE	GTCATTTAGCGTGAAC-1_contig_2	TRUE	510	TRA	TRAV38-2/DV8*01	None	TRAJ53*01	TRAC*01	TRUE	TRUE	CAYRSAENSGGSNYKLTF	TGTGCTTATAGGAGCGCGGAAAATAGTGGAGGTAGCAACTATAAACTGACATTT	3276	1	clonotype1676	clonotype1676_consensus_2	single TCR
GTCATTTGTACGCACC-1	TRUE	GTCATTTGTACGCACC-1_contig_1	TRUE	549	TRA	TRAV12-1*01	None	TRAJ11*01	TRAC*01	TRUE	TRUE	CVVPRYSTLTF	TGTGTGGTCCCCCGATACAGCACCCTCACCTTT	8565	2	clonotype1678	clonotype1678_consensus_1	single TCR
GTCATTTGTACGCACC-1	TRUE	GTCATTTGTACGCACC-1_contig_2	TRUE	684	TRB	TRBV20-1*02	TRBD2*02	TRBJ2-3*01	TRBC2*01	TRUE	TRUE	CSARMVGRSGPDTQYF	TGCAGTGCTAGGATGGTGGGACGTTCGGGACCAGATACGCAGTATTTT	6780	2	clonotype1678	clonotype1678_consensus_2	single TCR
GTCATTTTCAAACAAG-1	TRUE	GTCATTTTCAAACAAG-1_contig_1	TRUE	677	TRB	TRBV7-9*01	TRBD1*01	TRBJ1-1*01	TRBC1*01	TRUE	TRUE	CASSPGGNTEAFF	TGTGCCAGCAGCCCAGGGGGGAACACTGAAGCTTTCTTT	13830	4	clonotype1679	clonotype1679_consensus_1	single TCR
GTCATTTTCAAACAAG-1	TRUE	GTCATTTTCAAACAAG-1_contig_2	TRUE	513	TRA	TRAV20*01	None	TRAJ31*01	TRAC*01	TRUE	TRUE	CAVQALNNNARLMF	TGTGCTGTGCAGGCCTTGAATAACAATGCCAGACTCATGTTT	3049	1	clonotype1679	clonotype1679_consensus_2	single TCR
GTCATTTTCATGCAAC-1	TRUE	GTCATTTTCATGCAAC-1_contig_1	TRUE	546	TRB	TRBV5-1*01	None	TRBJ2-7*01	TRBC2*01	TRUE	TRUE	CASSDPTSYEQYF	TGCGCCAGCAGCGACCCGACGTCCTACGAGCAGTACTTC	9879	3	clonotype1680	clonotype1680_consensus_1	single TCR
GTCATTTTCATGCAAC-1	TRUE	GTCATTTTCATGCAAC-1_contig_2	TRUE	841	TRA	TRAV8-2*01	None	TRAJ24*02	TRAC*01	TRUE	TRUE	CVVSDPWSDSWGKLQF	TGTGTTGTGAGTGATCCCTGGAGTGACAGCTGGGGGAAATTGCAGTTT	3874	2	clonotype1680	clonotype1680_consensus_2	single TCR
GTCCTCAAGAGTTGGC-1	TRUE	GTCCTCAAGAGTTGGC-1_contig_1	TRUE	502	TRB	TRBV9*01	TRBD1*01	TRBJ1-2*01	TRBC1*01	TRUE	TRUE	CASSVDRATYGYTF	TGTGCCAGCAGCGTGGACAGGGCTACCTATGGCTACACCTTC	5673	2	clonotype1681	clonotype1681_consensus_2	single TCR
GTCCTCAAGAGTTGGC-1	TRUE	GTCCTCAAGAGTTGGC-1_contig_2	TRUE	740	TRA	TRAV21*01	None	TRAJ58*01	TRAC*01	TRUE	TRUE	CAVSPTSGSRLTF	TGTGCTGTGAGCCCAACCAGTGGCTCTAGGTTGACCTTT	2380	1	clonotype1681	clonotype1681_consensus_1	single TCR
GTCCTCATCGTTGACA-1	TRUE	GTCCTCATCGTTGACA-1_contig_1	TRUE	697	TRB	TRBV14*01	TRBD2*02	TRBJ2-5*01	TRBC2*01	TRUE	TRUE	CASGDSGRAQEETQYF	TGTGCCAGCGGGGATAGCGGGAGGGCACAAGAAGAGACCCAGTACTTC	16921	5	clonotype1687	clonotype1687_consensus_1	single TCR
GTCCTCATCGTTGACA-1	TRUE	GTCCTCATCGTTGACA-1_contig_2	TRUE	643	TRA	TRAV12-2*01	None	TRAJ31*01	TRAC*01	TRUE	TRUE	CAVGPWNNNARLMF	TGTGCCGTGGGCCCATGGAATAACAATGCCAGACTCATGTTT	6708	2	clonotype1687	clonotype1687_consensus_2	single TCR
GTCGGGTAGTCATGCT-1	TRUE	GTCGGGTAGTCATGCT-1_contig_1	TRUE	509	TRB	TRBV20-1*02	TRBD2*01	TRBJ1-2*01	TRBC1*01	TRUE	TRUE	CKLDNYYGYTF	TGCAAACTAGACAACTACTATGGCTACACCTTC	491	1	clonotype1688	clonotype1688_consensus_2	single TCR
GTCGGGTAGTCATGCT-1	TRUE	GTCGGGTAGTCATGCT-1_contig_4	TRUE	515	TRA	TRAV27*01	None	TRAJ54*01	TRAC*01	TRUE	TRUE	CAGARAGAQKLVF	TGTGCAGGAGCTAGGGCAGGAGCCCAGAAGCTGGTATTT	402	1	clonotype1688	clonotype1688_consensus_1	single TCR
GTCGGGTGTTCCATGA-1	TRUE	GTCGGGTGTTCCATGA-1_contig_1	TRUE	532	TRA	TRAV1-2*01	None	TRAJ6*01	TRAC*01	TRUE	TRUE	CAVKPTGGSYIPTF	TGTGCTGTGAAGCCAACAGGAGGAAGCTACATACCTACATTT	11419	3	clonotype1689	clonotype1689_consensus_1	single TCR
GTCGGGTGTTCCATGA-1	TRUE	GTCGGGTGTTCCATGA-1_contig_2	TRUE	709	TRB	TRBV7-8*01	TRBD1*01	TRBJ2-1*01	TRBC1*01	TRUE	TRUE	CASSLQGQGYYNEQFF	TGTGCCAGCAGCTTACAGGGTCAGGGGTACTACAATGAGCAGTTCTTC	10508	5	clonotype1689	clonotype1689_consensus_2	single TCR
GTCGGGTTCTAACGGT-1	TRUE	GTCGGGTTCTAACGGT-1_contig_1	TRUE	737	TRA	TRAV29/DV5*01	None	TRAJ30*01	TRAC*01	TRUE	TRUE	CAVPEIDRDDKIIF	TGTGCAGTCCCGGAAATAGACAGAGATGACAAGATCATCTTT	6434	3	clonotype1690	clonotype1690_consensus_1	single TCR
GTCGGGTTCTAACGGT-1	TRUE	GTCGGGTTCTAACGGT-1_contig_2	TRUE	513	TRB	TRBV2*01	TRBD2*01	TRBJ2-6*01	TRBC2*01	TRUE	TRUE	CASSEVSPRWASGANVLTF	TGTGCCAGCAGTGAGGTCTCCCCTCGGTGGGCCTCTGGGGCCAACGTCCTGACTTTC	3667	2	clonotype1690	clonotype1690_consensus_2	single TCR
GTCGTAACAAGGTTTC-1	TRUE	GTCGTAACAAGGTTTC-1_contig_1	TRUE	706	TRB	TRBV6-6*01	TRBD1*01	TRBJ1-1*01	TRBC1*01	TRUE	TRUE	CNTGTGSRGEAFF	TGTAACACCGGGACAGGTTCGAGAGGTGAAGCTTTCTTT	14196	4	clonotype1693	clonotype1693_consensus_1	single TCR
GTCGTAACAAGGTTTC-1	TRUE	GTCGTAACAAGGTTTC-1_contig_4	TRUE	517	TRA	TRAV29/DV5*01	None	TRAJ44*01	TRAC*01	TRUE	TRUE	CAALNTGTASKLTF	TGTGCAGCGCTAAATACCGGCACTGCCAGTAAACTCACCTTT	533	1	clonotype1693	clonotype1693_consensus_2	single TCR
GTCTCGTCACGTAAGG-1	TRUE	GTCTCGTCACGTAAGG-1_contig_1	TRUE	703	TRB	TRBV18*01	None	TRBJ2-2*01	TRBC2*01	TRUE	TRUE	CASSPQRAGPGGELFF	TGTGCCAGCTCACCACAAAGGGCCGGGCCTGGCGGGGAGCTGTTTTTT	7207	3	clonotype1695	clonotype1695_consensus_2	single TCR
GTCTCGTCACGTAAGG-1	TRUE	GTCTCGTCACGTAAGG-1_contig_2	TRUE	571	TRA	TRAV17*01	None	TRAJ10*01	TRAC*01	TRUE	TRUE	CATAILTGGGNKLTF	TGTGCTACGGCCATACTCACGGGAGGAGGAAACAAACTCACCTTT	3576	2	clonotype1695	clonotype1695_consensus_1	single TCR
GTCTCGTGTCAACTGT-1	TRUE	GTCTCGTGTCAACTGT-1_contig_1	TRUE	505	TRB	TRBV4-1*01	TRBD1*01	TRBJ2-7*01	TRBC2*01	TRUE	TRUE	CASSQGVGREQYF	TGCGCCAGCAGCCAAGGAGTGGGCCGGGAGCAGTACTTC	12589	4	clonotype1697	clonotype1697_consensus_1	single TCR
GTCTCGTGTCAACTGT-1	TRUE	GTCTCGTGTCAACTGT-1_contig_2	TRUE	533	TRA	TRAV13-2*01	None	TRAJ48*01	TRAC*01	TRUE	TRUE	CAEILSNFGNEKLTF	TGTGCAGAGATCTTATCTAACTTTGGAAATGAGAAATTAACCTTT	4207	1	clonotype1697	clonotype1697_consensus_2	single TCR
GTCTTCGCAAGGGTCA-1	TRUE	GTCTTCGCAAGGGTCA-1_contig_1	TRUE	685	TRB	TRBV7-9*03	TRBD1*01	TRBJ1-3*01	TRBC1*01	TRUE	TRUE	CASSSQGASGNTIYF	TGTGCCAGCAGCTCCCAAGGGGCCTCTGGAAACACCATATATTTT	17950	5	clonotype1699	clonotype1699_consensus_1	single TCR
GTCTTCGCAAGGGTCA-1	TRUE	GTCTTCGCAAGGGTCA-1_contig_2	TRUE	637	TRA	TRAV26-1*01	None	TRAJ23*01	TRAC*01	TRUE	TRUE	CIVRVNQGGKLIF	TGCATCGTCAGGGTGAACCAGGGAGGAAAGCTTATCTTC	6359	2	clonotype1699	clonotype1699_consensus_2	single TCR
GTGAAGGGTGGTCTCG-1	TRUE	GTGAAGGGTGGTCTCG-1_contig_1	TRUE	701	TRB	TRBV6-5*01	None	TRBJ2-2*01	TRBC2*01	TRUE	TRUE	CASSNTGELFF	TGTGCCAGCAGTAACACCGGGGAGCTGTTTTTT	12843	4	clonotype1705	clonotype1705_consensus_2	single TCR
GTGAAGGGTGGTCTCG-1	TRUE	GTGAAGGGTGGTCTCG-1_contig_3	TRUE	697	TRA	TRAV8-4*01	None	TRAJ47*02	TRAC*01	TRUE	TRUE	CAVSDLVGNKLVF	TGTGCTGTGAGTGATTTGGTGGGAAACAAGCTGGTCTTT	2939	1	clonotype1705	clonotype1705_consensus_1	single TCR
GTGCAGCAGATGTGGC-1	TRUE	GTGCAGCAGATGTGGC-1_contig_1	TRUE	696	TRB	TRBV5-1*01	None	TRBJ2-2*01	TRBC2*01	TRUE	TRUE	CASSDRLSTGELFF	TGCGCCAGCAGCGATCGACTGAGCACCGGGGAGCTGTTTTTT	28973	9	clonotype1706	clonotype1706_consensus_1	single TCR
GTGCAGCAGATGTGGC-1	TRUE	GTGCAGCAGATGTGGC-1_contig_2	TRUE	549	TRA	TRAV13-1*01	None	TRAJ37*01	TRAC*01	TRUE	TRUE	CAAIHGSGNTGKLIF	TGTGCAGCAATACATGGCTCTGGCAACACAGGCAAACTAATCTTT	14186	4	clonotype1706	clonotype1706_consensus_2	single TCR
GTGCAGCGTATTAGCC-1	TRUE	GTGCAGCGTATTAGCC-1_contig_1	TRUE	767	TRB	TRBV18*01	TRBD1*01	TRBJ2-2*01	TRBC2*01	TRUE	TRUE	CASSTTRTGLTSGELFF	TGTGCCAGCTCGACAACTCGGACAGGGCTGACGTCCGGGGAGCTGTTTTTT	17628	6	clonotype1710	clonotype1710_consensus_1	single TCR
GTGCAGCGTATTAGCC-1	TRUE	GTGCAGCGTATTAGCC-1_contig_3	TRUE	520	TRA	TRAV12-3*01	None	TRAJ23*01	TRAC*01	TRUE	TRUE	CAMSRGNQGGKLIF	TGTGCAATGAGCCGAGGTAACCAGGGAGGAAAGCTTATCTTC	4554	1	clonotype1710	clonotype1710_consensus_2	single TCR
GTGCATAAGAGGTAGA-1	TRUE	GTGCATAAGAGGTAGA-1_contig_1	TRUE	651	TRA	TRAV8-3*01	None	TRAJ28*01	TRAC*01	TRUE	TRUE	CARGAGSYQLTF	TGTGCCCGCGGGGCTGGGAGTTACCAACTCACTTTC	2212	1	clonotype1714	clonotype1714_consensus_2	single TCR
GTGCATAAGAGGTAGA-1	TRUE	GTGCATAAGAGGTAGA-1_contig_2	TRUE	746	TRB	TRBV18*01	TRBD1*01	TRBJ2-1*01	TRBC2*01	TRUE	TRUE	CASSPPSRGAGANEQFF	TGTGCCAGCTCACCACCGTCCAGGGGGGCCGGTGCAAATGAGCAGTTCTTC	14884	5	clonotype1714	clonotype1714_consensus_1	single TCR
GTGCATACATCACGAT-1	TRUE	GTGCATACATCACGAT-1_contig_1	TRUE	657	TRB	TRBV10-2*01	TRBD2*02	TRBJ1-1*01	TRBC1*01	TRUE	TRUE	CASSVERVHTEAFF	TGCGCCAGCAGTGTAGAGAGGGTACACACTGAAGCTTTCTTT	7307	2	clonotype1716	clonotype1716_consensus_2	single TCR
GTGCATACATCACGAT-1	TRUE	GTGCATACATCACGAT-1_contig_4	TRUE	558	TRA	TRAV20*01	None	TRAJ40*01	TRAC*01	TRUE	TRUE	CAVQLPTSGTYKYIF	TGTGCTGTGCAGCTCCCGACCTCAGGAACCTACAAATACATCTTT	12142	3	clonotype1716	clonotype1716_consensus_1	single TCR
GTGCATAGTTATGTGC-1	TRUE	GTGCATAGTTATGTGC-1_contig_2	TRUE	836	TRB	TRBV5-6*01	None	TRBJ2-1*01	TRBC2*01	TRUE	TRUE	CASGAGPSSYNEQFF	TGTGCCAGCGGTGCCGGGCCGAGCTCCTACAATGAGCAGTTCTTC	10560	3	clonotype1717	clonotype1717_consensus_2	single TCR
GTGCATAGTTATGTGC-1	TRUE	GTGCATAGTTATGTGC-1_contig_4	TRUE	660	TRA	TRAV8-6*01	None	TRAJ57*01	TRAC*01	TRUE	TRUE	CAVRRRTQGGSEKLVF	TGTGCTGTGAGACGGCGTACTCAGGGCGGATCTGAAAAGCTGGTCTTT	3136	1	clonotype1717	clonotype1717_consensus_1	single TCR
GTGCATATCCAGAAGG-1	TRUE	GTGCATATCCAGAAGG-1_contig_1	TRUE	707	TRB	TRBV5-8*01	None	TRBJ1-1*01	TRBC1*01	TRUE	TRUE	CASRKTSLGPNTEAFF	TGTGCCAGCAGGAAGACAAGTCTAGGCCCGAACACTGAAGCTTTCTTT	22355	8	clonotype1718	clonotype1718_consensus_2	single TCR
GTGCATATCCAGAAGG-1	TRUE	GTGCATATCCAGAAGG-1_contig_4	TRUE	652	TRA	TRAV8-4*01	None	TRAJ16*01	TRAC*01	TRUE	TRUE	CAVSDGVGGQKLLF	TGTGCTGTGAGTGATGGGGTCGGTGGCCAGAAGCTGCTCTTT	2939	1	clonotype1718	clonotype1718_consensus_1	single TCR
GTGCGGTAGATGCGAC-1	TRUE	GTGCGGTAGATGCGAC-1_contig_1	TRUE	665	TRB	TRBV5-5*01	TRBD1*01	TRBJ1-2*01	TRBC1*01	TRUE	TRUE	CASSLMTGVGYYGYTF	TGTGCCAGCAGCTTGATGACAGGCGTGGGGTACTATGGCTACACCTTC	7721	4	clonotype1721	clonotype1721_consensus_2	single TCR
GTGCGGTAGATGCGAC-1	TRUE	GTGCGGTAGATGCGAC-1_contig_2	TRUE	563	TRA	TRAV12-1*01	None	TRAJ17*01	TRAC*01	TRUE	TRUE	CVVSTLIKAAGNKLTF	TGTGTGGTGTCCACCCTGATCAAAGCTGCAGGCAACAAGCTAACTTTT	1174	1	clonotype1721	clonotype1721_consensus_1	single TCR
GTGCGGTCAGTGGGAT-1	TRUE	GTGCGGTCAGTGGGAT-1_contig_1	TRUE	715	TRB	TRBV2*01	TRBD2*01	TRBJ1-6*02	TRBC1*01	TRUE	TRUE	CASSAPGNSPLHF	TGTGCCAGCAGTGCCCCGGGGAATTCACCCCTCCACTTT	17154	6	clonotype1722	clonotype1722_consensus_1	single TCR
GTGCGGTCAGTGGGAT-1	TRUE	GTGCGGTCAGTGGGAT-1_contig_2	TRUE	462	TRA	TRAV4*01	None	TRAJ33*01	TRAC*01	TRUE	TRUE	CLVGDRSNYQLIW	TGCCTCGTGGGTGACCGTAGCAACTATCAGTTAATCTGG	1925	1	clonotype1722	clonotype1722_consensus_2	single TCR
GTGCGGTGTCGAGTTT-1	TRUE	GTGCGGTGTCGAGTTT-1_contig_1	TRUE	658	TRB	TRBV15*01	TRBD2*01	TRBJ2-7*01	TRBC1*01	TRUE	TRUE	CATSRDSVSGEQYF	TGTGCCACCAGCAGAGATTCCGTCAGCGGCGAGCAGTACTTC	4016	1	clonotype1723	clonotype1723_consensus_2	single TCR
GTGCGGTGTCGAGTTT-1	TRUE	GTGCGGTGTCGAGTTT-1_contig_3	TRUE	533	TRA	TRAV13-2*01	None	TRAJ5*01	TRAC*01	TRUE	TRUE	CAENGAGRRALTF	TGTGCAGAGAATGGCGCGGGCAGGAGAGCACTTACTTTT	8812	3	clonotype1723	clonotype1723_consensus_1	single TCR
GTGCGGTTCCCTAACC-1	TRUE	GTGCGGTTCCCTAACC-1_contig_1	TRUE	630	TRB	TRBV6-1*01	None	TRBJ1-4*01	TRBC1*01	TRUE	TRUE	CASSGFSATNEKLFF	TGTGCCAGCAGTGGATTCAGCGCAACTAATGAAAAACTGTTTTTT	14668	5	clonotype1725	clonotype1725_consensus_1	single TCR
GTGCGGTTCCCTAACC-1	TRUE	GTGCGGTTCCCTAACC-1_contig_2	TRUE	453	TRA	TRAV9-2*01	None	TRAJ47*02	TRAC*01	TRUE	TRUE	CALSVVEYGNKLVF	TGTGCTCTGAGTGTGGTGGAATATGGAAACAAGCTGGTCTTT	3938	1	clonotype1725	clonotype1725_consensus_2	single TCR
GTGCGGTTCTCAAGTG-1	TRUE	GTGCGGTTCTCAAGTG-1_contig_1	TRUE	664	TRB	TRBV25-1*01	TRBD2*01	TRBJ2-3*01	TRBC2*01	TRUE	TRUE	CASTGTSGTDTQYF	TGTGCCAGCACCGGGACTAGTGGCACAGATACGCAGTATTTT	6977	2	clonotype1726	clonotype1726_consensus_2	single TCR
GTGCGGTTCTCAAGTG-1	TRUE	GTGCGGTTCTCAAGTG-1_contig_2	TRUE	684	TRA	TRAV8-3*01	None	TRAJ23*01	TRAC*01	TRUE	TRUE	CAVGAIYNQGGKLIF	TGTGCTGTGGGTGCGATTTATAACCAGGGAGGAAAGCTTATCTTC	5317	2	clonotype1726	clonotype1726_consensus_1	single TCR
GTGCTTCAGCCGGTAA-1	TRUE	GTGCTTCAGCCGGTAA-1_contig_1	TRUE	503	TRB	TRBV5-1*01	None	TRBJ1-1*01	TRBC1*01	TRUE	TRUE	CASSLIGLSNTEAFF	TGCGCCAGCAGCTTGATTGGGCTCTCGAACACTGAAGCTTTCTTT	5524	2	clonotype1728	clonotype1728_consensus_2	single TCR
GTGCTTCAGCCGGTAA-1	TRUE	GTGCTTCAGCCGGTAA-1_contig_3	TRUE	603	TRA	TRAV8-1*01	None	TRAJ37*02	TRAC*01	TRUE	TRUE	CAVNTGPHGSSNTGKLIF	TGTGCCGTGAACACAGGACCCCATGGCTCTAGCAACACAGGCAAACTAATCTTT	10404	3	clonotype1728	clonotype1728_consensus_1	single TCR
GTGCTTCCACCGCTAG-1	TRUE	GTGCTTCCACCGCTAG-1_contig_1	TRUE	529	TRA	TRAV17*01	None	TRAJ17*01	TRAC*01	TRUE	TRUE	CAIEAAGNKLTF	TGTGCTATCGAAGCTGCAGGCAACAAGCTAACTTTT	4288	1	clonotype1729	clonotype1729_consensus_2	single TCR
GTGCTTCCACCGCTAG-1	TRUE	GTGCTTCCACCGCTAG-1_contig_2	TRUE	519	TRB	TRBV11-2*03	TRBD1*01	TRBJ2-2*01	TRBC2*01	TRUE	TRUE	CASSPGGKGASPLSGELFF	TGTGCCAGCAGCCCTGGGGGCAAGGGAGCCTCGCCTTTATCCGGGGAGCTGTTTTTT	5250	2	clonotype1729	clonotype1729_consensus_1	single TCR
GTGCTTCGTGCACCAC-1	TRUE	GTGCTTCGTGCACCAC-1_contig_1	TRUE	650	TRB	TRBV27*01	None	TRBJ2-7*01	TRBC2*01	TRUE	TRUE	CASSFKGNYEQYF	TGTGCCAGCAGCTTCAAGGGCAACTACGAGCAGTACTTC	11956	4	clonotype1730	clonotype1730_consensus_2	single TCR
GTGCTTCGTGCACCAC-1	TRUE	GTGCTTCGTGCACCAC-1_contig_2	TRUE	664	TRA	TRAV8-1*01	None	TRAJ24*02	TRAC*01	TRUE	TRUE	CAVTKKTTDSWGKLQF	TGTGCCGTGACAAAGAAGACAACTGACAGCTGGGGGAAATTGCAGTTT	3760	2	clonotype1730	clonotype1730_consensus_1	single TCR
GTGCTTCGTGCGATAG-1	TRUE	GTGCTTCGTGCGATAG-1_contig_1	TRUE	860	TRB	TRBV9*01	TRBD1*01	TRBJ2-3*01	TRBC2*01	TRUE	TRUE	CASSAWDGSTDTQYF	TGTGCCAGCAGCGCTTGGGACGGGAGCACAGATACGCAGTATTTT	12608	5	clonotype1731	clonotype1731_consensus_2	single TCR
GTGCTTCGTGCGATAG-1	TRUE	GTGCTTCGTGCGATAG-1_contig_2	TRUE	491	TRA	TRAV38-1*01	None	TRAJ49*01	TRAC*01	TRUE	TRUE	CAAGLNTGNQFYF	TGTGCTGCCGGACTCAACACCGGTAACCAGTTCTATTTT	3898	1	clonotype1731	clonotype1731_consensus_1	single TCR
GTGCTTCTCTGTTGAG-1	TRUE	GTGCTTCTCTGTTGAG-1_contig_1	TRUE	484	TRA	TRAV21*01	None	TRAJ44*01	TRAC*01	TRUE	TRUE	CAVPNTGTASKLTF	TGTGCTGTACCAAATACCGGCACTGCCAGTAAACTCACCTTT	3709	1	clonotype1732	clonotype1732_consensus_2	single TCR
GTGCTTCTCTGTTGAG-1	TRUE	GTGCTTCTCTGTTGAG-1_contig_2	TRUE	516	TRB	TRBV2*01	None	TRBJ2-3*01	TRBC2*01	TRUE	TRUE	CASSRAPRSVDTQYF	TGTGCCAGCAGTAGGGCTCCCCGGTCAGTAGATACGCAGTATTTT	6800	2	clonotype1732	clonotype1732_consensus_1	single TCR
GTGGGTCCAGACACTT-1	TRUE	GTGGGTCCAGACACTT-1_contig_1	TRUE	696	TRB	TRBV18*01	TRBD1*01	TRBJ2-1*01	TRBC1*01	TRUE	TRUE	CASSEAGDLYNEQFF	TGTGCCAGCTCTGAGGCAGGGGATCTTTACAATGAGCAGTTCTTC	11573	4	clonotype1734	clonotype1734_consensus_1	single TCR
GTGGGTCCAGACACTT-1	TRUE	GTGGGTCCAGACACTT-1_contig_3	TRUE	552	TRA	TRAV12-3*01	None	TRAJ48*01	TRAC*01	TRUE	TRUE	CAIRRGNEKLTF	TGTGCAATCCGTCGCGGAAATGAGAAATTAACCTTT	10467	3	clonotype1734	clonotype1734_consensus_2	single TCR
GTGGGTCGTCCCTACT-1	TRUE	GTGGGTCGTCCCTACT-1_contig_1	TRUE	684	TRB	TRBV2*01	TRBD1*01	TRBJ1-4*01	TRBC1*01	TRUE	TRUE	CASSERQGATNEKLFF	TGTGCCAGCAGTGAAAGACAGGGGGCAACTAATGAAAAACTGTTTTTT	13521	4	clonotype1735	clonotype1735_consensus_1	single TCR
GTGGGTCGTCCCTACT-1	TRUE	GTGGGTCGTCCCTACT-1_contig_3	TRUE	492	TRA	TRAV29/DV5*01	None	TRAJ37*01	TRAC*01	TRUE	TRUE	CAAILNTGKLIF	TGTGCAGCTATACTCAACACAGGCAAACTAATCTTT	3780	1	clonotype1735	clonotype1735_consensus_2	single TCR
GTGTGCGAGTACGTTC-1	TRUE	GTGTGCGAGTACGTTC-1_contig_1	TRUE	638	TRA	TRAV27*01	None	TRAJ46*01	TRAC*01	TRUE	TRUE	CAGEKKSSGDKLTF	TGTGCAGGAGAGAAGAAAAGCAGCGGAGACAAGCTGACTTTT	4377	1	clonotype1737	clonotype1737_consensus_1	single TCR
GTGTGCGAGTACGTTC-1	TRUE	GTGTGCGAGTACGTTC-1_contig_2	TRUE	658	TRB	TRBV10-3*01	TRBD1*01	TRBJ2-2*01	TRBC2*01	TRUE	TRUE	CAIRMAGGTGELFF	TGTGCCATCAGAATGGCAGGGGGTACGGGGGAGCTGTTTTTT	3340	2	clonotype1737	clonotype1737_consensus_2	single TCR
GTGTGCGAGTGGTAGC-1	TRUE	GTGTGCGAGTGGTAGC-1_contig_1	TRUE	650	TRA	TRAV8-3*01	None	TRAJ31*01	TRAC*01	TRUE	TRUE	CAVRDDARLMF	TGTGCTGTGAGAGATGATGCCAGACTCATGTTT	4989	2	clonotype1738	clonotype1738_consensus_2	single TCR
GTGTGCGAGTGGTAGC-1	TRUE	GTGTGCGAGTGGTAGC-1_contig_4	TRUE	563	TRB	TRBV10-2*01	TRBD2*02	TRBJ2-5*01	TRBC2*01	TRUE	TRUE	CASSLGGNSGRAETQYF	TGCGCCAGCAGTTTAGGCGGGAATAGCGGGAGAGCAGAGACCCAGTACTTC	3239	1	clonotype1738	clonotype1738_consensus_1	single TCR
GTGTGCGAGTGTTAGA-1	TRUE	GTGTGCGAGTGTTAGA-1_contig_1	TRUE	522	TRB	TRBV6-5*01	TRBD1*01	TRBJ1-5*01	TRBC1*01	TRUE	TRUE	CASSYGVGQLPQHF	TGTGCCAGCAGTTACGGGGTAGGACAACTGCCCCAGCATTTT	12653	6	clonotype1739	clonotype1739_consensus_1	single TCR
GTGTGCGAGTGTTAGA-1	TRUE	GTGTGCGAGTGTTAGA-1_contig_2	TRUE	548	TRA	TRAV12-2*01	None	TRAJ23*01	TRAC*01	TRUE	TRUE	CAVNDNQGGKLIF	TGTGCCGTGAACGATAACCAGGGAGGAAAGCTTATCTTC	3968	1	clonotype1739	clonotype1739_consensus_2	single TCR
GTGTGCGTCGAGAACG-1	TRUE	GTGTGCGTCGAGAACG-1_contig_1	TRUE	512	TRB	TRBV7-6*01	TRBD1*01	TRBJ1-6*02	TRBC1*01	TRUE	TRUE	CASSLAQGLTSPLHF	TGTGCCAGCAGCTTAGCGCAGGGCTTGACTTCACCCCTCCACTTT	10945	3	clonotype1742	clonotype1742_consensus_2	single TCR
GTGTGCGTCGAGAACG-1	TRUE	GTGTGCGTCGAGAACG-1_contig_2	TRUE	560	TRA	TRAV12-3*01	None	TRAJ48*01	TRAC*01	TRUE	TRUE	CAMTPNNFGNEKLTF	TGTGCAATGACTCCTAATAACTTTGGAAATGAGAAATTAACCTTT	3888	1	clonotype1742	clonotype1742_consensus_1	single TCR
GTGTGCGTCTTGAGAC-1	TRUE	GTGTGCGTCTTGAGAC-1_contig_1	TRUE	579	TRA	TRAV29/DV5*01	None	TRAJ40*01	TRAC*01	TRUE	TRUE	CAASAASGTYKYIF	TGTGCAGCAAGCGCCGCCTCAGGAACCTACAAATACATCTTT	3123	1	clonotype1745	clonotype1745_consensus_2	single TCR
GTGTGCGTCTTGAGAC-1	TRUE	GTGTGCGTCTTGAGAC-1_contig_2	TRUE	529	TRB	TRBV20-1*02	TRBD2*01	TRBJ2-2*01	TRBC2*01	TRUE	TRUE	CSARGNLAADFGELFF	TGCAGTGCTAGGGGCAATCTAGCGGCCGATTTCGGGGAGCTGTTTTTT	12210	4	clonotype1745	clonotype1745_consensus_1	single TCR
GTGTTAGCAGACGTAG-1	TRUE	GTGTTAGCAGACGTAG-1_contig_1	TRUE	469	TRA	TRAV12-3*01	None	TRAJ54*01	TRAC*01	TRUE	TRUE	CAMSGEGAQKLVF	TGTGCAATGAGCGGTGAGGGAGCCCAGAAGCTGGTATTT	4300	1	clonotype1747	clonotype1747_consensus_2	single TCR
GTGTTAGCAGACGTAG-1	TRUE	GTGTTAGCAGACGTAG-1_contig_5	TRUE	559	TRB	TRBV7-6*01	TRBD1*01	TRBJ1-4*01	TRBC1*01	TRUE	TRUE	CASSLEGVKLFF	TGTGCCAGCAGCTTAGAGGGGGTAAAACTGTTTTTT	3380	1	clonotype1747	clonotype1747_consensus_1	single TCR
GTGTTAGGTCGCCATG-1	TRUE	GTGTTAGGTCGCCATG-1_contig_1	TRUE	826	TRB	TRBV19*01	TRBD1*01	TRBJ2-6*01	TRBC2*01	TRUE	TRUE	CASSGGQVHKSGANVLTF	TGTGCCAGTAGTGGGGGACAGGTGCACAAATCTGGGGCCAACGTCCTGACTTTC	7758	3	clonotype1748	clonotype1748_consensus_1	single TCR
GTGTTAGGTCGCCATG-1	TRUE	GTGTTAGGTCGCCATG-1_contig_4	TRUE	647	TRA	TRAV8-3*01	None	TRAJ22*01	TRAC*01	TRUE	TRUE	CAVAISGSARQLTF	TGTGCTGTGGCTATTTCTGGTTCTGCAAGGCAACTGACCTTT	2507	2	clonotype1748	clonotype1748_consensus_2	single TCR
GTGTTAGGTCTAGTCA-1	TRUE	GTGTTAGGTCTAGTCA-1_contig_1	TRUE	553	TRB	TRBV20-1*02	TRBD2*02	TRBJ2-7*01	TRBC2*01	TRUE	TRUE	CSASGREGTYEQYF	TGCAGTGCTAGCGGGCGGGAGGGAACCTACGAGCAGTACTTC	9048	3	clonotype1749	clonotype1749_consensus_2	single TCR
GTGTTAGGTCTAGTCA-1	TRUE	GTGTTAGGTCTAGTCA-1_contig_3	TRUE	487	TRA	TRAV10*01	None	TRAJ9*01	TRAC*01	TRUE	TRUE	CVVSAYTGGFKTIF	TGTGTGGTGAGCGCTTATACTGGAGGCTTCAAAACTATCTTT	2345	1	clonotype1749	clonotype1749_consensus_1	single TCR
GTGTTAGTCAATACCG-1	TRUE	GTGTTAGTCAATACCG-1_contig_1	TRUE	843	TRB	TRBV5-4*01	TRBD2*01	TRBJ1-1*01	TRBC1*01	TRUE	TRUE	CASSRVVALNTEAFF	TGTGCCAGCAGCCGTGTAGTGGCTTTGAACACTGAAGCTTTCTTT	13930	8	clonotype1750	clonotype1750_consensus_1	single TCR
GTGTTAGTCAATACCG-1	TRUE	GTGTTAGTCAATACCG-1_contig_3	TRUE	509	TRA	TRAV29/DV5*01	None	TRAJ58*01	TRAC*01	TRUE	TRUE	CAASAGTSGSRLTF	TGTGCAGCAAGCGCCGGAACCAGTGGCTCTAGGTTGACCTTT	3928	1	clonotype1750	clonotype1750_consensus_2	single TCR
GTTAAGCTCATCTGCC-1	TRUE	GTTAAGCTCATCTGCC-1_contig_1	TRUE	696	TRB	TRBV27*01	TRBD2*02	TRBJ1-1*01	TRBC1*01	TRUE	TRUE	CASKLGPEVKKAFF	TGTGCCAGCAAATTGGGGCCGGAGGTTAAAAAAGCTTTCTTT	2614	1	clonotype1753	clonotype1753_consensus_2	single TCR
GTTAAGCTCATCTGCC-1	TRUE	GTTAAGCTCATCTGCC-1_contig_3	TRUE	459	TRA	TRAV35*01	None	TRAJ22*01	TRAC*01	TRUE	TRUE	CAASRSGSARQLTF	TGTGCTGCTTCCCGTTCTGGTTCTGCAAGGCAACTGACCTTT	4605	1	clonotype1753	clonotype1753_consensus_1	single TCR
[truncated: 750 more rows]

## Sheet: KD2 before
barcode	is_cell	contig_id	high_confidence	length	chain	v_gene	d_gene	j_gene	c_gene	full_length	productive	cdr3	cdr3_nt	reads	umis	raw_clonotype_id	raw_consensus_id	TCRgroup
[truncated: 5,545 more rows]

## Sheet: KD3 before
barcode	is_cell	contig_id	high_confidence	length	chain	v_gene	d_gene	j_gene	c_gene	full_length	productive	cdr3	cdr3_nt	reads	umis	raw_clonotype_id	raw_consensus_id	TCRgroup
[truncated: 6,711 more rows]

[truncated: 12 more sheets: KD4 before, KD5 before, KD6 before, KD1 after, KD2 after, KD3 after, KD4 after, KD5 after, KD6 after, NC1, NC2, NC3]
